# Supplementary material
Source: PubMed Central journal article supplement (PMC5382122)
Supplement: NIHMS826369-supplement-supporting_information.pdf [file NIHMS826369-supplement-supporting_information.pdf]

## Supporting Information

**Enantioselective, Catalytic Fluorolactonization Reactions with a Nucleophilic Fluoride Source**

Eric M. Woerly, Steven M. Banik, Eric N. Jacobsen\*

Department of Chemistry and Chemical Biology, Harvard University, 12 Oxford St., Cambridge, Massachusetts 02138, United States

\*jacobsen@chem.harvard.edu

Table of contents:

|                                                                                    |       |
|------------------------------------------------------------------------------------|-------|
| I. General methods.....                                                            | SI-1  |
| II. Synthesis of catalyst <b>2d</b> .....                                          | SI-2  |
| III. Table 1. Optimization of reaction conditions.....                             | SI-3  |
| IV. Preparation of substrates.....                                                 | SI-15 |
| V. Table 2. Fluorolactonization of aryl substituted substrates.....                | SI-34 |
| VI. Table 3. Fluorolactonization of alkene substituted substrates.....             | SI-60 |
| VII. Scheme 2. Comparing electrophilic and nucleophilic fluorinating reagents..... | SI-74 |
| VIII. Additional substrates.....                                                   | SI-79 |
| IX. X-ray crystallographic data.....                                               | SI-80 |
| X. NMR spectra.....                                                                | SI-90 |

**I. General methods**

**Materials.** Commercial reagents were purchased from Sigma-Aldrich, VWR, Alfa Aesar, TCI America, Strem Chemicals Inc., or Frontier Scientific and were used without further purification unless otherwise noted. Solvents were purified via passage through packed columns as described by Pangborn and coworkers<sup>1</sup> (THF, Et<sub>2</sub>O, CH<sub>3</sub>CN, and CH<sub>2</sub>Cl<sub>2</sub>: dry neutral alumina; benzene and toluene: dry neutral alumina and Q5 reactant; DMF: activated molecular sieves). All water was deionized prior to use. Triethylamine and pyridine were freshly distilled under an atmosphere of nitrogen from CaH<sub>2</sub>.

**General Experimental Procedures.** Unless noted, all reactions were performed in flame-dried round bottom or modified Schlenk flasks fitted with rubber septa under a positive pressure of argon or nitrogen. Organic solutions were concentrated via rotary evaporation under reduced pressure with a bath temperature of 35–40 °C. Reactions were monitored by analytical thin layer chromatography (TLC) performed using the indicated solvent. Compounds were visualized by exposure to a UV lamp ( $\lambda = 254$  nm) and/or a solution of basic KMnO<sub>4</sub> followed by brief heating using a Varitemp heat gun. Column chromatography was performed using standard methods<sup>2</sup> or on a Teledyne-Isco CombiFlash Rf purification system using EM Science silica gel 60Å (230-400 mesh). For loading, compounds were adsorbed onto non acid-washed Celite under reduced pressure from an acetone solution. Specifically, for a 1 g mixture of crude material the sample is dissolved in reagent grade acetone (25 to 50 mL) and to the flask is added Celite 454 Filter Aid

(5 to 15 g). The mixture is then concentrated under reduced pressure to afford a powder, which is then loaded on top of a silica gel column. The procedure is typically repeated with a small amount of acetone (5 mL) and Celite (2 g) to ensure quantitative transfer. Cryocools are commercially available circulating cooling baths.

**Structural analysis.**  $^1\text{H}$ ,  $^{13}\text{C}$ , and  $^{19}\text{F}$  NMR spectra were recorded at 23 °C on a Inova-500 (500 MHz). Chemical shifts ( $\delta$ ) are reported in parts per million (ppm) downfield from tetramethylsilane and referenced to residual protium in the NMR solvent ( $\text{CHCl}_3$ ,  $\delta = 7.26$ ) or to added tetramethylsilane ( $\delta = 0.00$ ). Data are reported as follows: chemical shift, multiplicity (s = singlet, d = doublet, t = triplet, q = quartet, quint = quintet, sext = sextet, sept = septet, m = multiplet, b = broad, app = apparent), coupling constant ( $J$ ) in Hertz (Hz), and integration.  $^{13}\text{C}$  NMR shifts ( $\delta$ ) are reported in ppm downfield from tetramethylsilane and referenced to carbon resonances in the NMR solvent ( $\text{CDCl}_3$ ,  $\delta = 77.0$ ) or to added tetramethylsilane ( $\delta = 0.00$ ). Carbons bearing boron substituents were not observed (quadrupolar relaxation). High resolution mass spectra (HRMS) were performed by Jennifer Wang at the Harvard University Mass Spectrometry Laboratory. Infrared spectra were collected from a thin film on a Bruker Optics Tensor 27 FTIR spectrometer. Absorption maxima ( $\nu_{\text{max}}$ ) are reported in wavenumbers ( $\text{cm}^{-1}$ ). High-performance liquid chromatography (HPLC) analysis was performed using an Agilent 1200 series quaternary HPLC system with commercially available ChiralPak and ChiralCel columns. X-ray crystallographic analyses were carried out by Dr. Shao-Liang Zheng at the Harvard University X-Ray facility.

## II. Synthesis of catalyst **2d**

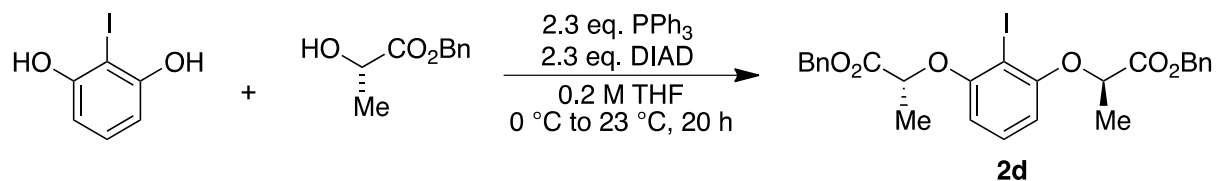

**Aryl iodide **2d**.** To a 250 mL round bottom flask charged with a stir bar was added 2-iodoresorcinol<sup>3</sup> (4.0 g, 17.0 mmol, 1.0 eq.), benzyl (*S*)-(-)-lactate (6.4 g, 35.7 mmol, 2.1 eq.), and triphenylphosphine (10.3 g, 39.0 mmol, 2.3 eq.). A septum was affixed and the flask was flushed with  $\text{N}_2$ . THF (85 mL) was then added. The solution was cooled to 0 °C. Diisopropyl azodicarboxylate (DIAD, 7.7 mL, 39.0 mmol, 2.3 eq.) was added dropwise. The solution was warmed to 23 °C and stirred at this temperature for 20 h. After this time, basic alumina (8.0 g) was added to the reaction solution. The suspension was stirred at 23 °C for 10 min. The suspension was filtered and the filtrate was concentrated under reduced pressure. The resulting residue was dry loaded onto celite and purified by column chromatography through a plug of basic alumina followed directly by a column of silica gel (hexanes:Et<sub>2</sub>O 100:0 → 80:20) to afford aryl iodide **2d** as a clear, colorless oil (8.6 g, 90% yield).

TLC (hexanes:EtOAc 6:1)

$R_f = 0.28$ , stained by  $\text{KMnO}_4$

$^1\text{H}$ -NMR (500 MHz,  $\text{CDCl}_3$ )

$\delta$  7.37-7.29 (m, 10H), 7.03 (t,  $J$  = 8.5 Hz, 1H), 6.34 (d,  $J$  = 8.5 Hz, 2H), 5.21 (app dd,  $J$  = 15.5, 12.5 Hz, 4H), 4.82 (q,  $J$  = 6.5 Hz, 2H), 1.73 (d,  $J$  = 6.5 Hz, 6H).

$^{13}\text{C}$ -NMR (125 MHz,  $\text{CDCl}_3$ )

$\delta$  171.4, 158.2, 135.3, 129.5, 128.5, 128.4, 128.2, 107.0, 80.7, 74.2, 66.9, 18.6.

HRMS (method)

Calculated for  $\text{C}_{26}\text{H}_{25}\text{IO}_6$  ( $\text{M}+\text{H}$ ) $^+$ : 561.0769

Found: 561.0782

IR (thin film,  $\text{cm}^{-1}$ )

3033, 2989, 2941, 1752, 1587, 1459, 1251, 1131, 1104, 749, 698

$[\alpha]_{\text{D}}^{23}$  -32.4 ( $c$  = 1.0,  $\text{CHCl}_3$ )

### III. Table 1. Optimization of reaction conditions.

Entry 1:

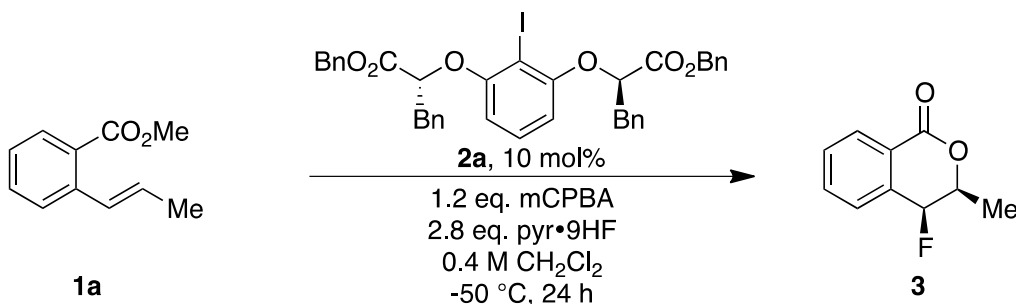

To a 1.5 mL polyethylene Eppendorf tube charged with a Teflon PTFE coated stir bar was added mCPBA (77%, 26.9 mg, 0.12 mmol, 1.2 eq.). The reaction vial was cooled in a dry ice/acetone bath to  $<-60$  °C. To the cooled vial was added aryl iodide catalyst **2a** (7.1 mg, 0.01 mmol, 10 mol%) as a solution in  $\text{CH}_2\text{Cl}_2$  (0.15 mL) followed by pyr·9HF (70% HF, 0.065 mL, 2.5 mmol HF, 25 eq. HF). The alkene methyl (*E*)-2-(prop-1-en-1-yl)benzoate **1a** (17.6 mg, 0.10 mmol) was added as a solution in  $\text{CH}_2\text{Cl}_2$  (0.10 mL, 0.40 M total concentration). The tube was capped and transferred to a -50 °C continuous cooling bath with vigorous stirring (vigorous stirring of the heterogeneous mixture is important to ensure reproducible conversion) at -50 °C for 24 h. After this time, the crude reaction suspension was quenched by being added to a cooled (-78 °C) suspension of basic alumina (0.5 g) in  $\text{CH}_2\text{Cl}_2$  (2.0 mL). The resulting suspension was warmed to 23 °C and stirred at this temperature for 10 min. The suspension was filtered through a plug of basic alumina, eluting with  $\text{CH}_2\text{Cl}_2$ . The crude reaction solution was analyzed by chiral GC.

87% *ee*, Chiral GC ( $\beta$ -Cyclosil, 60 °C to 180 °C, 10 psi);  $t_{\text{R}}$ (major) = 44.4 min,  $t_{\text{R}}$ (minor) = 44.7 min. 72% GC yield based on a dodecane internal standard.

Racemic sample:

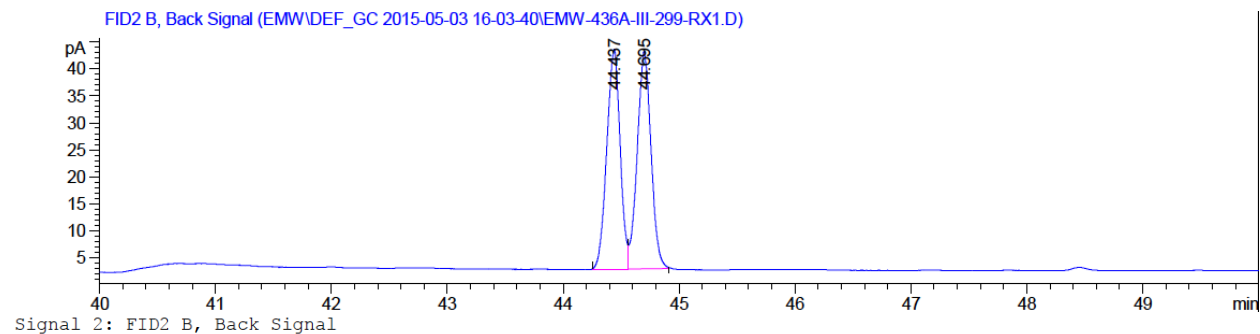

## Enriched sample:

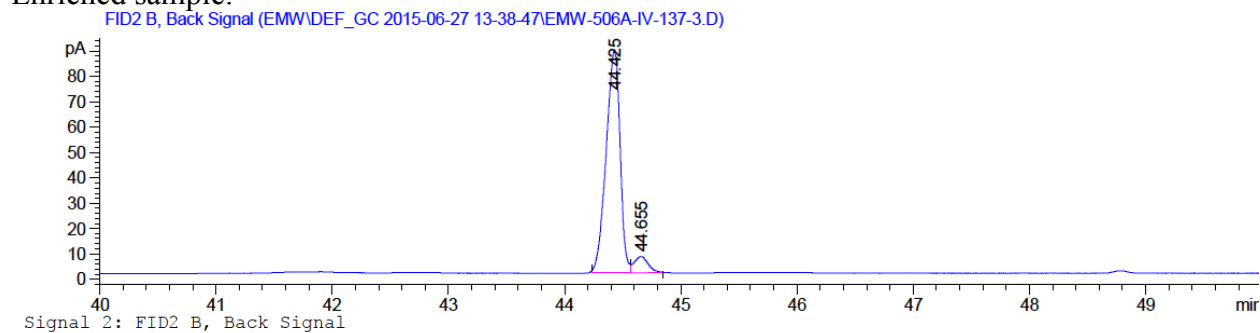

## Entry 2:

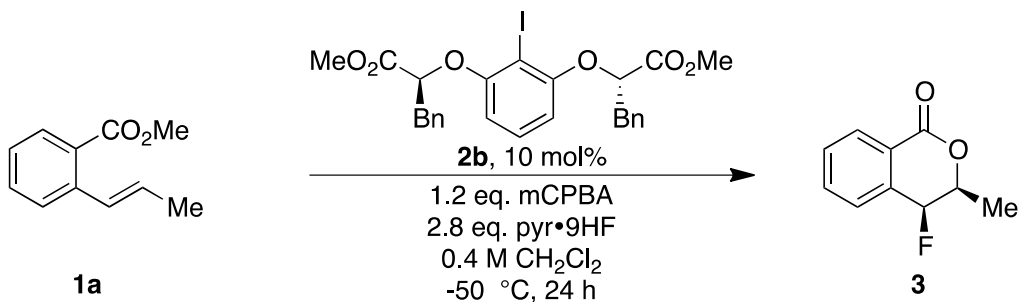

To a 1.5 mL polyethylene Eppendorf tube charged with a Teflon PTFE coated stir bar was added mCPBA (77%, 26.9 mg, 0.12 mmol, 1.2 eq.). The reaction vial was cooled in a dry ice/acetone bath to  $<-60$  °C. To the cooled vial was added aryl iodide catalyst **2b** (5.6 mg, 0.01 mmol, 10





crude reaction suspension was quenched by being added to a cooled (-78 °C) suspension of basic alumina (0.5 g) in CH<sub>2</sub>Cl<sub>2</sub> (2.0 mL). The resulting suspension was warmed to 23 °C and stirred at this temperature for 10 min. The suspension was filtered through a plug of basic alumina, eluting with CH<sub>2</sub>Cl<sub>2</sub>. The crude reaction solution was analyzed by chiral GC.

95% *ee*, Chiral GC (β-Cyclosil, 60 °C to 180 °C, 10 psi); *t<sub>R</sub>*(major) = 44.4 min, *t<sub>R</sub>*(minor) = 44.7 min. 86% GC yield based on a dodecane internal standard.

Enriched sample:

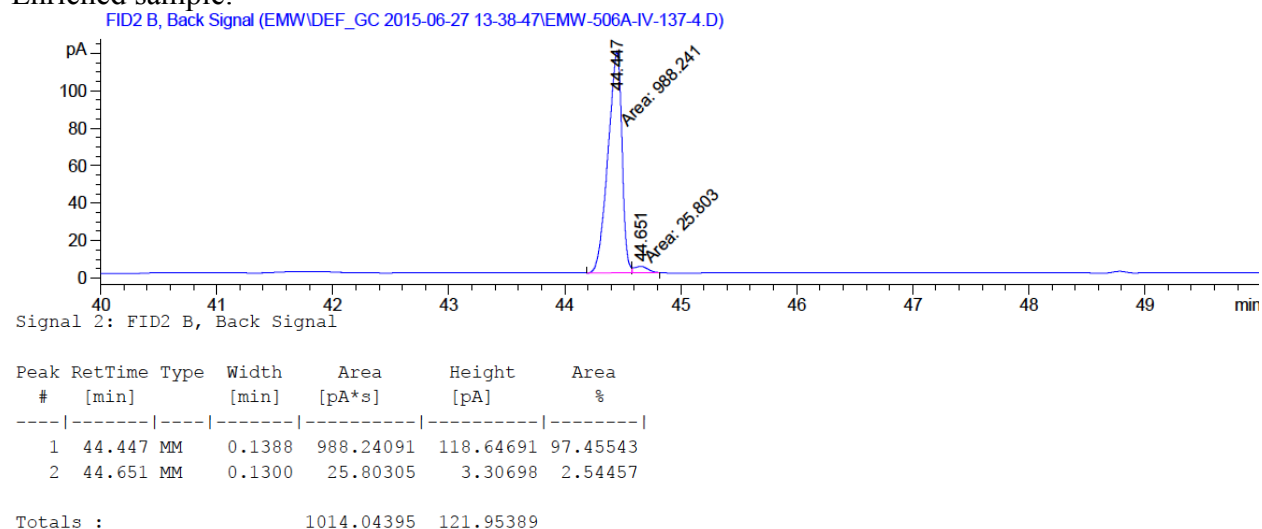

1.0 mmol reaction:

To a 7 mL low-density polyethylene vial with snap cap charged with a Teflon PTFE coated stir bar was added mCPBA (77%, 269 mg, 1.2 mmol, 1.2 eq.). The reaction vial was cooled in a dry ice/acetone bath to <-60 °C. To the cooled vial was added aryl iodide catalyst **2d** (56.0 mg, 0.10 mmol, 10 mol%) as a solution in CH<sub>2</sub>Cl<sub>2</sub> (1.5 mL) followed by pyr•9HF (70% HF, 0.65 mL, 25 mmol HF, 25 eq. HF). The alkene (*E*)-2-(prop-1-en-1-yl)benzoate **1a** (1.0 mmol) was added as a solution in CH<sub>2</sub>Cl<sub>2</sub> (1.0 mL, 0.40 M total concentration). The tube was capped and transferred to a -50 °C cryocool with vigorous stirring (vigorous stirring of the heterogeneous mixture is important to ensure reproducible conversion) at -50 °C for 24 h. After this time, the crude reaction suspension was quenched by being added to a cooled (-78 °C) suspension of basic alumina (2.5 g) in CH<sub>2</sub>Cl<sub>2</sub> (5.0 mL). The resulting suspension was warmed to 23 °C and stirred at this temperature for 10 min. The suspension was filtered through a plug of basic alumina, eluting with CH<sub>2</sub>Cl<sub>2</sub>. The solution was concentrated under reduced pressure. The resulting residue was dry loaded onto celite and purified by column chromatography on silica gel (hexanes:EtOAc 100:0 → 80:20) to afford fluorolactone **3** as a white solid (122 mg, 68% yield).

TLC (hexanes:EtOAc 4:1)

*R<sub>f</sub>* = 0.14, stained by KMnO<sub>4</sub>

<sup>1</sup>H-NMR (500 MHz, CDCl<sub>3</sub>)

$\delta$  8.19 (d,  $J = 7.5$  Hz, 1H), 7.69 (tt,  $J = 7.5, 1.5$  Hz, 1H), 7.62 (tdd,  $J = 7.5, 2.0, 1.5$  Hz, 1H), 7.52 (m, 1H), 5.32 (dd,  $J = 49.5, 1.5$  Hz, 1H), 4.72 (dq,  $J = 27.3, 6.8, 1.5$  Hz, 1H), 1.64 (d,  $J = 6.5$  Hz, 3H).

$^{13}\text{C}$ -NMR (125 MHz,  $\text{CDCl}_3$ )

$\delta$  163.8, 134.6 (d,  $J = 17.5$  Hz), 134.3 (d,  $J = 3.0$  Hz), 131.3 (d,  $J = 3.5$  Hz), 130.4 (d,  $J = 3.0$  Hz), 128.8 (d,  $J = 3.5$  Hz), 124.7 (d,  $J = 2.5$  Hz), 85.3 (d,  $J = 181.0$  Hz), 75.7 (d,  $J = 22.5$  Hz), 16.1 (d,  $J = 5.0$  Hz).

$^{19}\text{F}$ -NMR (470 MHz,  $\text{CDCl}_3$ )

$\delta$  -183.0 (dd,  $J = 49.5, 28.0$  Hz).

HRMS (ESI+)

Calculated for  $\text{C}_{10}\text{H}_9\text{FO}_2$  ( $\text{M}+\text{H}$ ) $^+$ : 181.0659

Found: 181.0660

IR (thin film,  $\text{cm}^{-1}$ )

2990, 2943, 1730, 1274, 1239, 1124, 1103, 901, 765, 723, 700, 649

$[\alpha]_{\text{D}}^{23} +78.8$  ( $c$  1.0,  $\text{CHCl}_3$ )

95% *ee*, Chiral HPLC (CHIRALPAK OD-H, 5% isopropanol in hexanes, 1.0 mL/min,  $\lambda = 230$  nm);  $t_{\text{R}}$ (major) = 17.4 min,  $t_{\text{R}}$ (minor) = 22.4 min.

Racemic sample:

DAD1 C, Sig=230,4 Ref=450,100 (AL\DEF\_LC 2015-06-12 14-19-01\EMW-477A-IV-79-RAC.D)

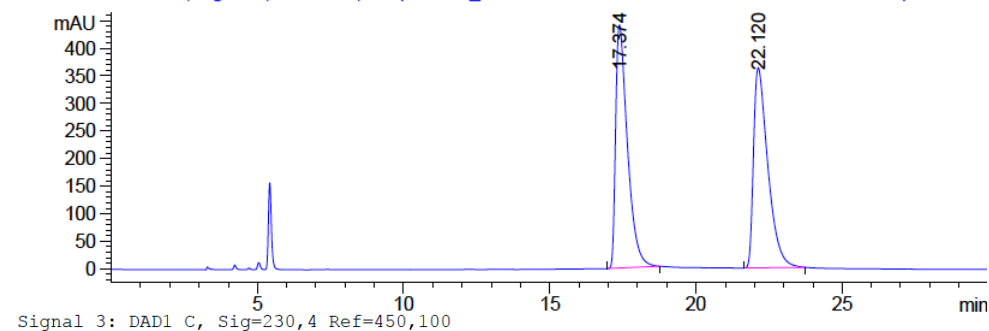

| Peak # | RetTime [min] | Type | Width [min] | Area [mAU*s] | Height [mAU] | Area %  |
|--------|---------------|------|-------------|--------------|--------------|---------|
| 1      | 17.374        | BB   | 0.4220      | 1.23833e4    | 440.47375    | 49.9442 |
| 2      | 22.120        | BB   | 0.5113      | 1.24110e4    | 362.61212    | 50.0558 |

Totals : 2.47943e4 803.08588



Enriched sample:

DAD1 C, Sig=230,4 Ref=450,100 (AL\DEF\_LC 2015-06-12 14-19-01\EMW-477A-IV-79-1MMOLD)

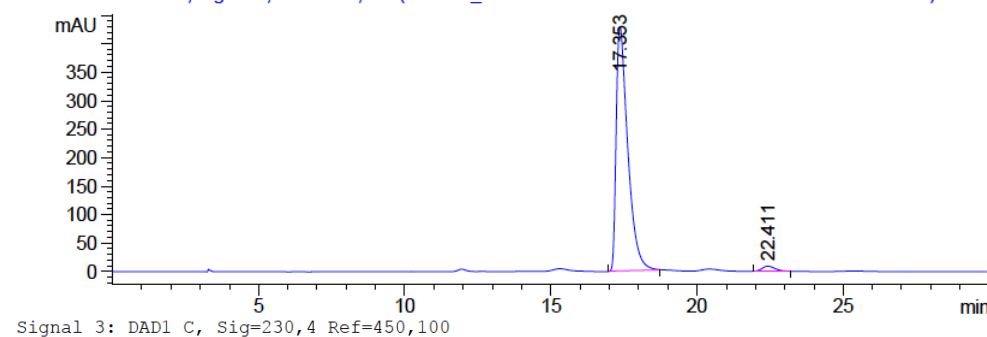

| Peak # | RetTime [min] | Type | Width [min] | Area [mAU*s] | Height [mAU] | Area %  |
|--------|---------------|------|-------------|--------------|--------------|---------|
| 1      | 17.353        | BB   | 0.4142      | 1.18424e4    | 428.77740    | 97.7392 |
| 2      | 22.411        | BB   | 0.4571      | 273.92612    | 8.99970      | 2.2608  |

Totals : 1.21164e4 437.77710

Entry 5:

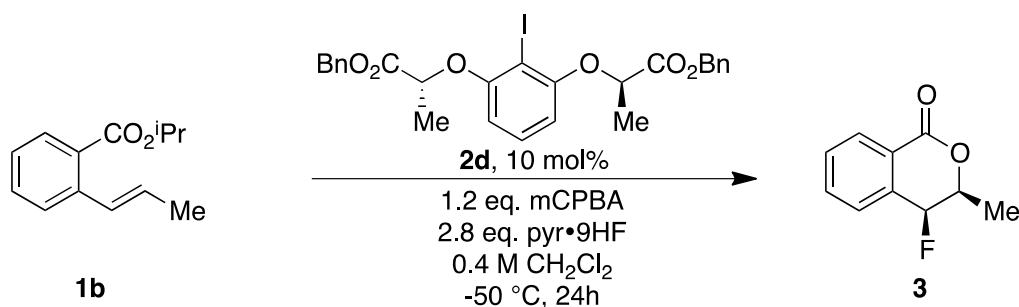

To a 1.5 mL polyethylene Eppendorf tube charged with a Teflon PTFE coated stir bar was added mCPBA (77%, 26.9 mg, 0.12 mmol, 1.2 eq.). The reaction vial was cooled in a dry ice/acetone bath to <-60 °C. To the cooled vial was added aryl iodide catalyst **2d** (5.6 mg, 0.01 mmol, 10 mol%) as a solution in CH<sub>2</sub>Cl<sub>2</sub> (0.15 mL) followed by pyr·9HF (70% HF, 0.065 mL, 2.5 mmol HF, 25 eq. HF). The alkene isopropyl (*E*)-2-(prop-1-en-1-yl)benzoate **1b** (20.4 mg, 0.10 mmol) was added as a solution in CH<sub>2</sub>Cl<sub>2</sub> (0.10 mL, 0.40 M total concentration). The tube was capped and transferred to a -50 °C cryocool with vigorous stirring (vigorous stirring of the heterogeneous mixture is important to ensure reproducible conversion) at -50 °C for 24 h. After this time, the crude reaction suspension was quenched by being added to a cooled (-78 °C) suspension of basic alumina (0.5 g) in CH<sub>2</sub>Cl<sub>2</sub> (2.0 mL). The resulting suspension was warmed to 23 °C and stirred at this temperature for 10 min. The suspension was filtered through a plug of basic alumina, eluting with CH<sub>2</sub>Cl<sub>2</sub>. The crude reaction solution was analyzed by chiral GC.

95% *ee*, Chiral GC (β-Cyclosil, 60 °C to 180 °C, 10 psi); *t<sub>R</sub>*(major) = 44.4 min, *t<sub>R</sub>*(minor) = 44.6 min. 72% GC yield based on a dodecane internal standard.

Enriched sample:

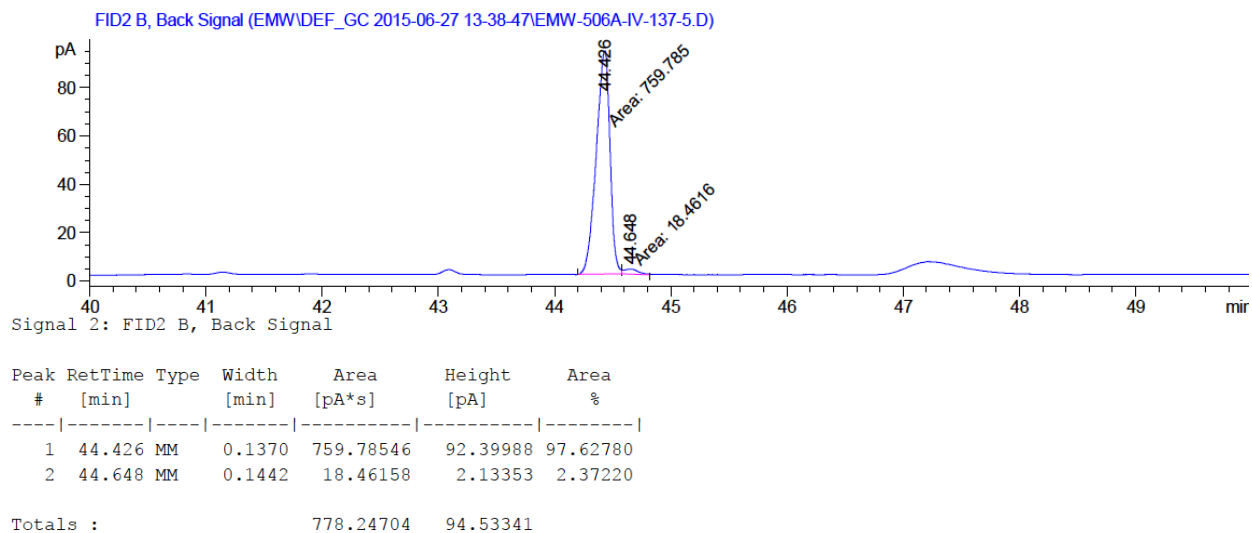

## Entry 6:

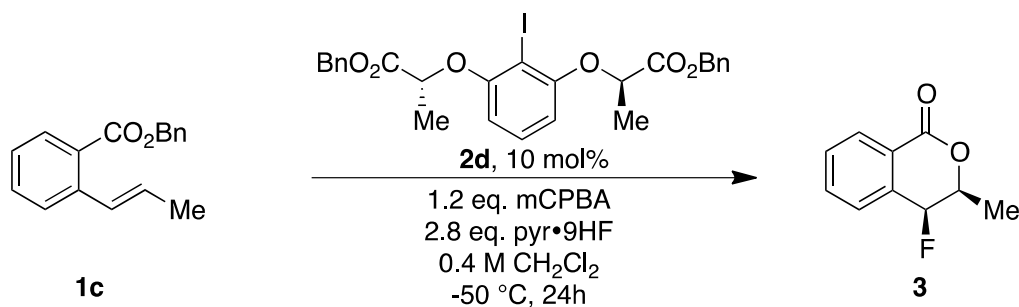

To a 1.5 mL polyethylene Eppendorf tube charged with a Teflon PTFE coated stir bar was added mCPBA (77%, 26.9 mg, 0.12 mmol, 1.2 eq.). The reaction vial was cooled in a dry ice/acetone bath to <-60 °C. To the cooled vial was added aryl iodide catalyst **2d** (5.6 mg, 0.01 mmol, 10 mol%) as a solution in CH<sub>2</sub>Cl<sub>2</sub> (0.15 mL) followed by pyr·9HF (70% HF, 0.065 mL, 2.5 mmol HF, 25 eq. HF). The alkene benzyl (*E*)-2-(prop-1-en-1-yl)benzoate **1c** (25.2 mg, 0.10 mmol) was added as a solution in CH<sub>2</sub>Cl<sub>2</sub> (0.10 mL, 0.40 M total concentration). The tube was capped and transferred to a -50 °C cryocool with vigorous stirring (vigorous stirring of the heterogeneous mixture is important to ensure reproducible conversion) at -50 °C for 24 h. After this time, the crude reaction suspension was quenched by being added to a cooled (-78 °C) suspension of basic alumina (0.5 g) in CH<sub>2</sub>Cl<sub>2</sub> (2.0 mL). The resulting suspension was warmed to 23 °C and stirred at this temperature for 10 min. The suspension was filtered through a plug of basic alumina, eluting with CH<sub>2</sub>Cl<sub>2</sub>. The crude reaction solution was analyzed by chiral GC.

87% *ee*, Chiral GC (β-Cyclosil, 60 °C to 180 °C, 10 psi); *t<sub>R</sub>*(major) = 44.4 min, *t<sub>R</sub>*(minor) = 44.7 min. 42% GC yield based on a dodecane internal standard.

Enriched sample:

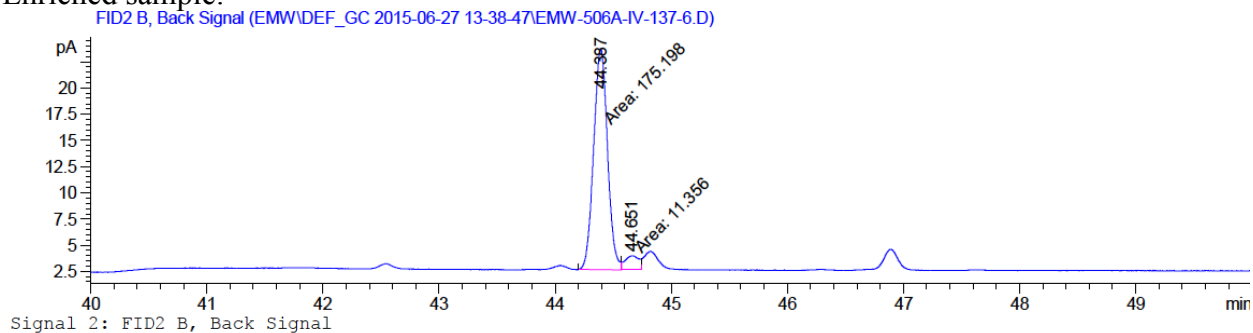

| Peak # | RetTime [min] | Type | Width [min] | Area [pA*s] | Height [pA] | Area %   |
|--------|---------------|------|-------------|-------------|-------------|----------|
| 1      | 44.387        | MM   | 0.1384      | 175.19818   | 21.09846    | 93.91276 |
| 2      | 44.651        | MM   | 0.1402      | 11.35600    | 1.35027     | 6.08724  |

Totals :                      186.55418    22.44873

Entry 7:

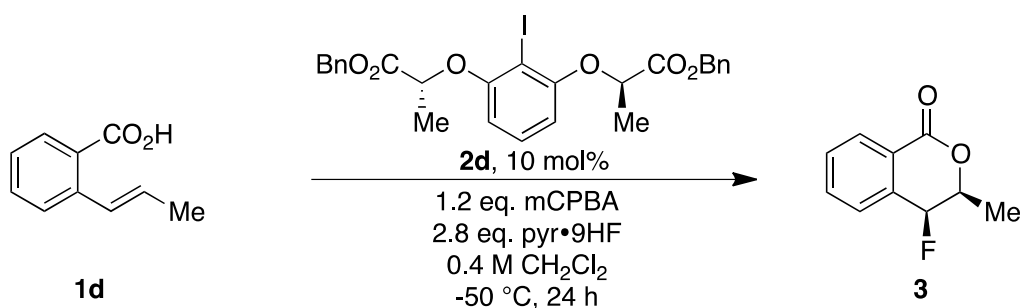

To a 1.5 mL polyethylene Eppendorf tube charged with a Teflon PTFE coated stir bar was added mCPBA (77%, 26.9 mg, 0.12 mmol, 1.2 eq.). The reaction vial was cooled in a dry ice/acetone bath to <-60 °C. To the cooled vial was added aryl iodide catalyst **2d** (5.6 mg, 0.01 mmol, 10 mol%) as a solution in CH<sub>2</sub>Cl<sub>2</sub> (0.15 mL) followed by pyr•9HF (70% HF, 0.065 mL, 2.5 mmol HF, 25 eq. HF). The alkene (*E*)-2-(prop-1-en-1-yl)benzoic acid **1d** (16.2 mg, 0.10 mmol) was added as a solution in CH<sub>2</sub>Cl<sub>2</sub> (0.10 mL, 0.40 M total concentration). The tube was capped and transferred to a -50 °C cryocool with vigorous stirring (vigorous stirring of the heterogeneous mixture is important to ensure reproducible conversion) at -50 °C for 24 h. After this time, the crude reaction suspension was quenched by being added to a cooled (-78 °C) suspension of basic alumina (0.5 g) in CH<sub>2</sub>Cl<sub>2</sub> (2.0 mL). The resulting suspension was warmed to 23 °C and stirred at this temperature for 10 min. The suspension was filtered through a plug of basic alumina, eluting with CH<sub>2</sub>Cl<sub>2</sub>. The crude reaction solution was analyzed by chiral GC.

89% *ee*, Chiral GC (β-Cyclosil, 60 °C to 180 °C, 10 psi); *t<sub>R</sub>*(major) = 44.5 min, *t<sub>R</sub>*(minor) = 44.7 min. 95% GC yield based on a dodecane internal standard.

Enriched sample:

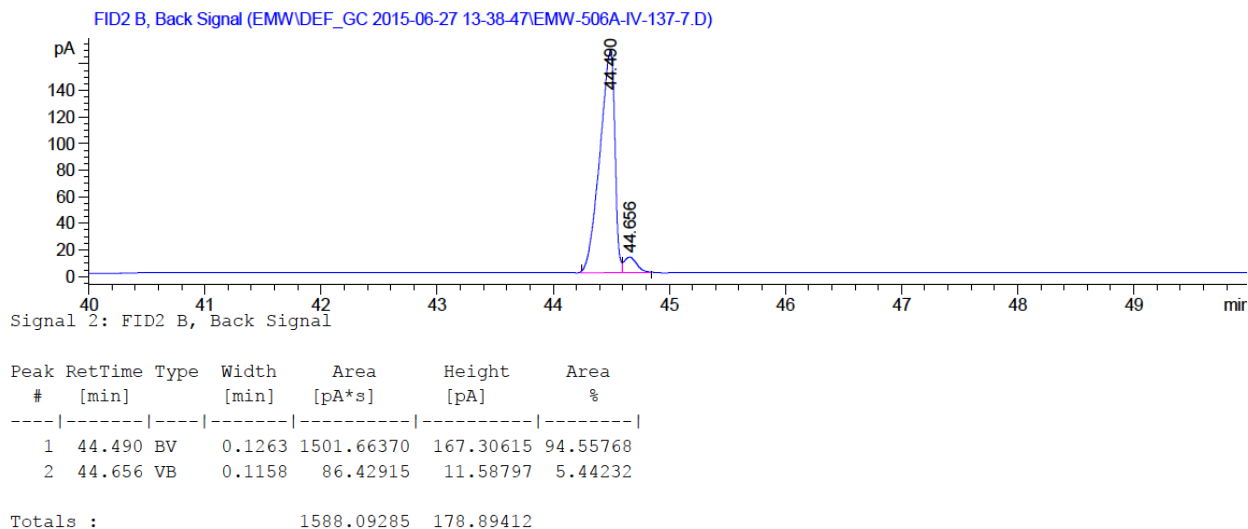

See page SI-77 for a 1 mmol scale reaction with isolated yield.

Footnote 15:

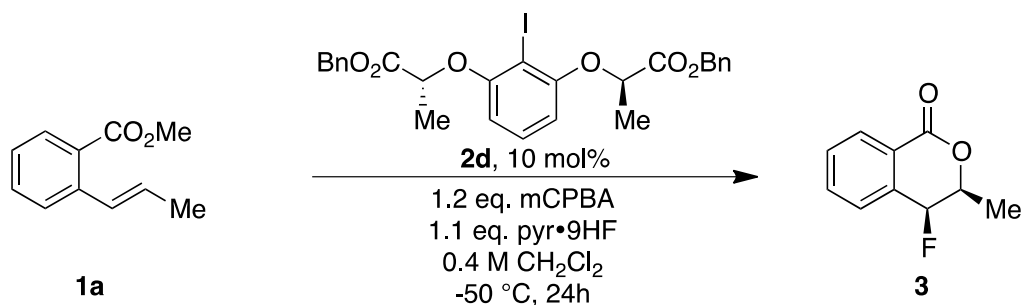

To a 1.5 mL polyethylene Eppendorf tube charged with a Teflon PTFE coated stir bar was added mCPBA (77%, 26.9 mg, 0.12 mmol, 1.2 eq.). The reaction vial was cooled in a dry ice/acetone bath to <-60 °C. To the cooled vial was added aryl iodide catalyst **2d** (5.6 mg, 0.01 mmol, 10 mol%) as a solution in CH<sub>2</sub>Cl<sub>2</sub> (0.15 mL) followed by pyr·9HF (70% HF, 0.026 mL, 1.0 mmol HF, 10 eq. HF). The alkene methyl (*E*)-2-(prop-1-en-1-yl)benzoate **1a** (17.6 mg, 0.10 mmol) was added as a solution in CH<sub>2</sub>Cl<sub>2</sub> (0.10 mL, 0.40 M total concentration). The tube was capped and transferred to a -50 °C cryocool with vigorous stirring (vigorous stirring of the heterogeneous mixture is important to ensure reproducible conversion) at -50 °C for 24 h. After this time, the crude reaction suspension was quenched by being added to a cooled (-78 °C) suspension of basic alumina (0.5 g) in CH<sub>2</sub>Cl<sub>2</sub> (2.0 mL). The resulting suspension was warmed to 23 °C and stirred at this temperature for 10 min. The suspension was filtered through a plug of basic alumina, eluting with CH<sub>2</sub>Cl<sub>2</sub>. The crude reaction solution was analyzed by chiral GC.

93% *ee*, Chiral GC (β-Cyclosil, 60 °C to 180 °C, 10 psi); *t<sub>R</sub>*(major) = 44.4 min, *t<sub>R</sub>*(minor) = 44.7 min. 28% GC yield based on a dodecane internal standard.

Enriched sample:

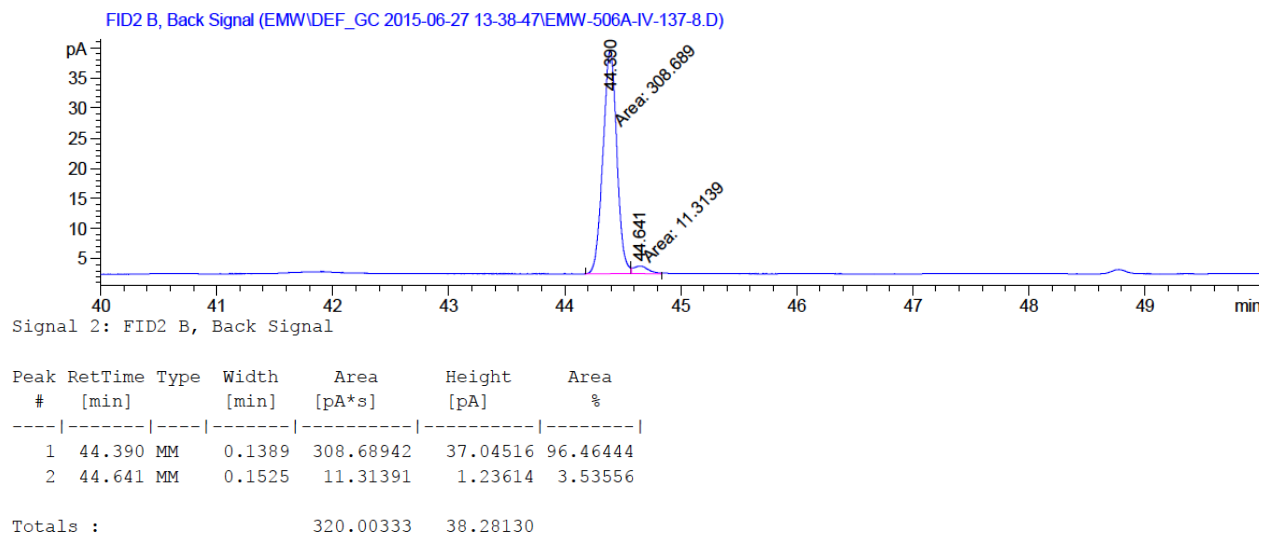

## Footnote 15:

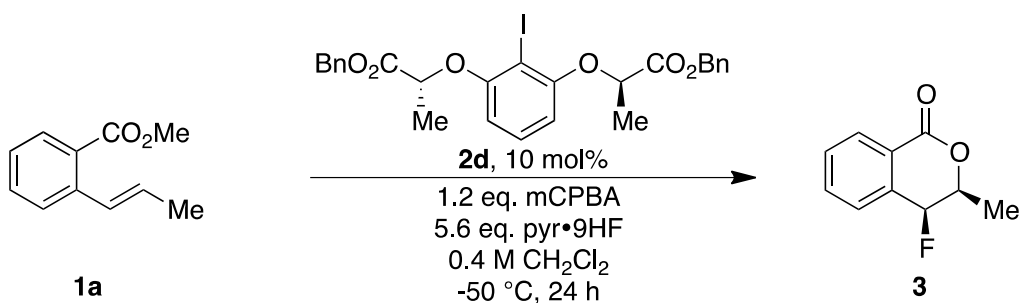

To a 1.5 mL polyethylene Eppendorf tube charged with a Teflon PTFE coated stir bar was added mCPBA (77%, 26.9 mg, 0.12 mmol, 1.2 eq.). The reaction vial was cooled in a dry ice/acetone bath to <-60 °C. To the cooled vial was added aryl iodide catalyst **2d** (5.6 mg, 0.01 mmol, 10 mol%) as a solution in CH<sub>2</sub>Cl<sub>2</sub> (0.15 mL) followed by pyr•9HF (70% HF, 0.13 mL, 5.0 mmol HF, 50 eq. HF). The alkene methyl (*E*)-2-(prop-1-en-1-yl)benzoate **1a** (17.6 mg, 0.10 mmol) was added as a solution in CH<sub>2</sub>Cl<sub>2</sub> (0.10 mL, 0.40 M total concentration). The tube was capped and transferred to a -50 °C cryocool with vigorous stirring (vigorous stirring of the heterogeneous mixture is important to ensure reproducible conversion) at -50 °C for 24 h. After this time, the crude reaction suspension was quenched by being added to a cooled (-78 °C) suspension of basic alumina (0.5 g) in CH<sub>2</sub>Cl<sub>2</sub> (2.0 mL). The resulting suspension was warmed to 23 °C and stirred at this temperature for 10 min. The suspension was filtered through a plug of basic alumina, eluting with CH<sub>2</sub>Cl<sub>2</sub>. The crude reaction solution was analyzed by chiral GC.

93% *ee*, Chiral GC (β-Cyclosil, 60 °C to 180 °C, 10 psi); t<sub>R</sub>(major) = 44.4 min, t<sub>R</sub>(minor) = 44.7 min. 83% GC yield based on a dodecane internal standard.

Enriched sample:

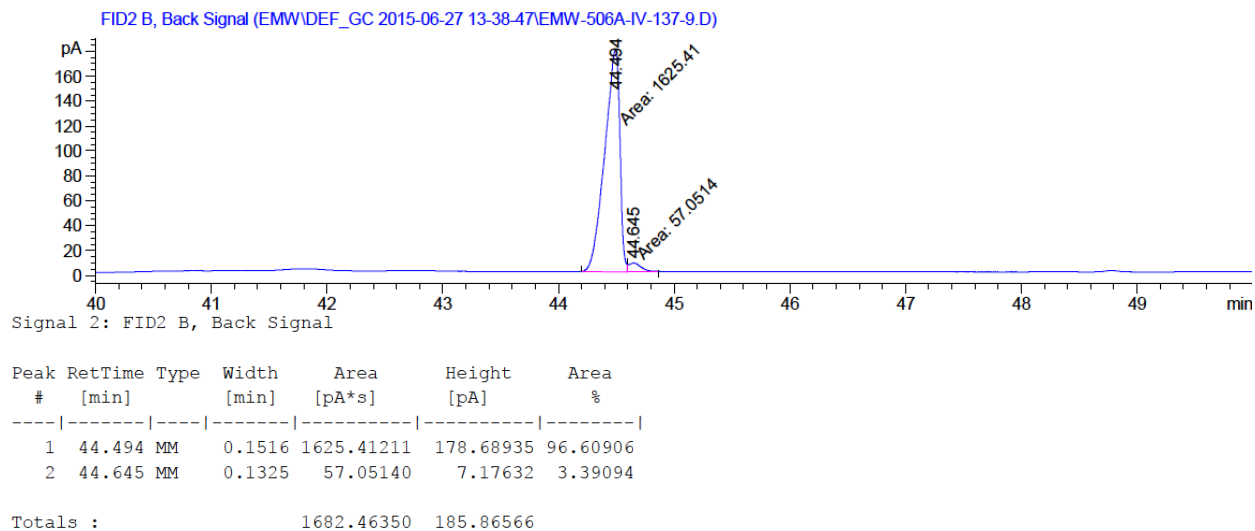

## Footnote 15:

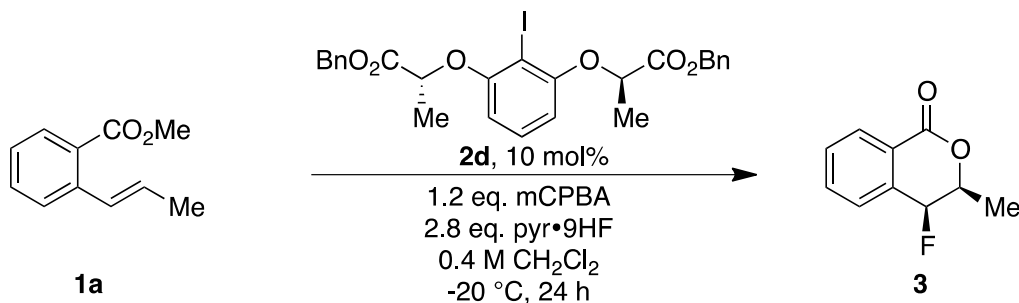

To a 1.5 mL polyethylene Eppendorf tube charged with a Teflon PTFE coated stir bar was added mCPBA (77%, 26.9 mg, 0.12 mmol, 1.2 eq.). The reaction vial was cooled in a dry ice/acetone bath to <-60 °C. To the cooled vial was added aryl iodide catalyst **2d** (5.6 mg, 0.01 mmol, 10 mol%) as a solution in CH<sub>2</sub>Cl<sub>2</sub> (0.15 mL) followed by pyr·9HF (70% HF, 0.065 mL, 2.5 mmol HF, 25 eq. HF). The alkene methyl (*E*)-2-(prop-1-en-1-yl)benzoate **1a** (17.6 mg, 0.10 mmol) was added as a solution in CH<sub>2</sub>Cl<sub>2</sub> (0.10 mL, 0.40 M total concentration). The tube was capped and transferred to a -20 °C cryocool with vigorous stirring (vigorous stirring of the heterogeneous mixture is important to ensure reproducible conversion) at -20 °C for 24 h. After this time, the crude reaction suspension was quenched by being added to a cooled (-78 °C) suspension of basic alumina (0.5 g) in CH<sub>2</sub>Cl<sub>2</sub> (2.0 mL). The resulting suspension was warmed to 23 °C and stirred at this temperature for 10 min. The suspension was filtered through a plug of basic alumina, eluting with CH<sub>2</sub>Cl<sub>2</sub>. The crude reaction solution was analyzed by chiral GC.

86% *ee*, Chiral GC (β-Cyclosil, 60 °C to 180 °C, 10 psi); *t*<sub>R</sub>(major) = 44.4 min, *t*<sub>R</sub>(minor) = 44.7 min. 71% GC yield based on a dodecane internal standard.

Enriched sample:



$K_3PO_4$  (9.0 mL, 5 eq.) at 45 °C for 21 h. Brine (40 mL) and  $Et_2O$  (40 mL) were used in the workup. Alkene **1a** was isolated as a pale yellow oil (434 mg, 46% yield). Characterization of this compound was consistent with previously reported data.<sup>4</sup>

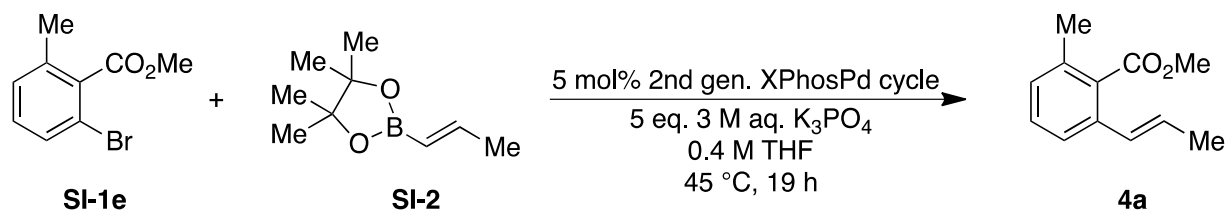

**methyl (*E*)-2-methyl-6-(prop-1-en-1-yl)benzoate 4a.** Following the “general procedure for the synthesis of substrates 4a-o”, methyl 2-bromo-6-methylbenzoate **SI-1e** (573 mg, 2.5 mmol, 1.0 eq.), *trans*-1-propenylboronic acid pinacol ester **SI-2** (462 mg, 2.8 mmol, 1.1 eq.), and 2<sup>nd</sup> generation XPhosPd cycle (98 mg, 0.13 mmol, 5 mol%) were reacted in THF (6.2 mL, 0.4 M) and 3 M aqueous  $K_3PO_4$  (4.0 mL, 5 eq.) at 45 °C for 19 h. Brine (40 mL) and  $Et_2O$  (40 mL) were used in the workup. Alkene **4a** was isolated as a pale yellow oil (474 mg, 99% yield).

TLC (hexanes:EtOAc 9:1)

$R_f = 0.49$ , stained by  $KMnO_4$

$^1H$ -NMR (500 MHz,  $CDCl_3$ )

$\delta$  7.35 (d,  $J = 7.5$  Hz, 1H), 7.25 (t,  $J = 7.0$  Hz, 1H), 7.07 (d,  $J = 7.5$  Hz, 1H), 6.41 (d,  $J = 16.0$  Hz, 1H), 6.21 (dq,  $J = 16.0, 7.0$  Hz, 1H), 3.94 (s, 3H), 2.32 (s, 3H), 1.89 (d,  $J = 7.0$  Hz, 3H).

$^{13}C$ -NMR (125 MHz,  $CDCl_3$ )

$\delta$  170.4, 135.4, 134.8, 132.2, 129.3, 128.7, 128.4, 127.9, 123.0, 52.0, 19.6, 18.8.

HRMS (ESI+)

Calculated for  $C_{12}H_{14}O_2$  ( $M+H$ )<sup>+</sup>: 191.1067

Found: 191.1072

IR (thin film,  $cm^{-1}$ )

3028, 2950, 1724, 1435, 1265, 1233, 1114, 1069, 958, 767

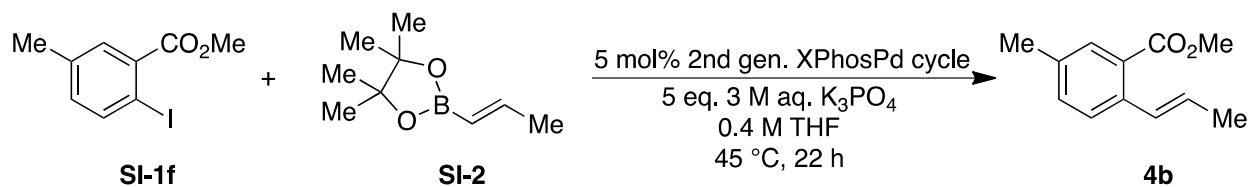



**methyl (*E*)-5-methyl-2-(prop-1-en-1-yl)benzoate 4b.** Following the “general procedure for the synthesis of substrates 4a-o”, methyl 2-iodo-5-methylbenzoate **SI-1f** (690 mg, 2.5 mmol, 1.0 eq.), *trans*-1-propenylboronic acid pinacol ester **SI-2** (462 mg, 2.8 mmol, 1.1 eq.), and 2<sup>nd</sup> generation XPhosPd cycle (98 mg, 0.13 mmol, 5 mol%) were reacted in THF (6.2 mL, 0.4 M) and 3 M aqueous K<sub>3</sub>PO<sub>4</sub> (4.0 mL, 5 eq.) at 45 °C for 22 h. Brine (40 mL) and Et<sub>2</sub>O (40 mL) were used in the workup. Alkene **4b** was isolated as a pale yellow oil (475 mg, 99% yield).

TLC (hexanes:EtOAc 9:1)

R<sub>f</sub> = 0.49, stained by KMnO<sub>4</sub>

<sup>1</sup>H-NMR (500 MHz, CDCl<sub>3</sub>)

δ 7.66 (s, 1H), 7.44 (d, *J* = 8.5 Hz, 1H), 7.25 (d, *J* = 7.5 Hz, 1H), 7.13 (app d, *J* = 16.0 Hz, 1H), 6.13 (dq, *J* = 15.5, 6.5 Hz, 1H), 3.91 (s, 3H), 2.36 (s, 3H), 1.93 (dd, *J* = 6.5, 1.5 Hz, 3H).

<sup>13</sup>C-NMR (125 MHz, CDCl<sub>3</sub>)

δ 168.2, 136.8, 136.2, 132.8, 130.6, 129.4, 127.9, 127.7, 127.1, 52.0, 20.9, 18.8.

HRMS (ESI+)

Calculated for C<sub>12</sub>H<sub>14</sub>O<sub>2</sub> (M+H)<sup>+</sup>: 191.1067

Found: 191.1075

IR (thin film, cm<sup>-1</sup>)

2950, 2915, 2853, 1719, 1433, 1290, 1249, 1198, 1143, 1097, 1074, 965, 838, 776

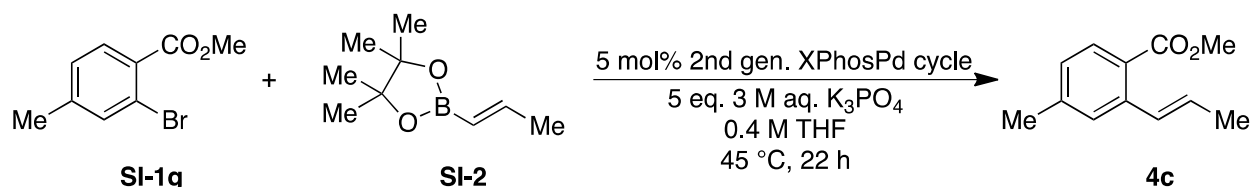

**methyl (*E*)-4-methyl-2-(prop-1-en-1-yl)benzoate 4c.** Following the “general procedure for the synthesis of substrates 4a-o”, methyl 2-bromo-4-methylbenzoate **SI-1g** (573 mg, 2.5 mmol, 1.0 eq.), *trans*-1-propenylboronic acid pinacol ester **SI-2** (462 mg, 2.8 mmol, 1.1 eq.), and 2<sup>nd</sup> generation XPhosPd cycle (98 mg, 0.13 mmol, 5 mol%) were reacted in THF (6.2 mL, 0.4 M) and 3 M aqueous K<sub>3</sub>PO<sub>4</sub> (4.0 mL, 5 eq.) at 45 °C for 22 h. Brine (40 mL) and Et<sub>2</sub>O (40 mL) were used in the workup. Alkene **4c** was isolated as a pale yellow oil (475 mg, 99% yield).

TLC (hexanes:EtOAc 9:1)

R<sub>f</sub> = 0.49, stained by KMnO<sub>4</sub>

<sup>1</sup>H-NMR (500 MHz, CDCl<sub>3</sub>)

δ 7.78 (d, *J* = 7.5 Hz, 1H), 7.34 (s, 1H), 7.20 (dq, *J* = 16.0, 1.5 Hz, 1H), 7.07 (d, *J* = 8.0 Hz, 1H), 6.15 (dq, *J* = 16.0, 7.0 Hz, 1H), 3.89 (s, 3H), 2.39 (s, 3H), 1.94 (dd, *J* = 6.5, 1.5 Hz, 3H).

$^{13}\text{C}$ -NMR (125 MHz,  $\text{CDCl}_3$ )

$\delta$  168.0, 142.4, 139.9, 130.5, 129.9, 128.3, 127.9, 127.3, 125.1, 51.8, 21.5, 18.8.

HRMS (ESI+)

Calculated for  $\text{C}_{12}\text{H}_{14}\text{O}_2$  ( $\text{M}+\text{H}$ ) $^+$ : 191.1067

Found: 191.1074

IR (thin film,  $\text{cm}^{-1}$ )

2950, 2913, 2852, 1716, 1607, 1433, 1284, 1243, 1189, 1138, 1098, 1076, 961, 816, 767

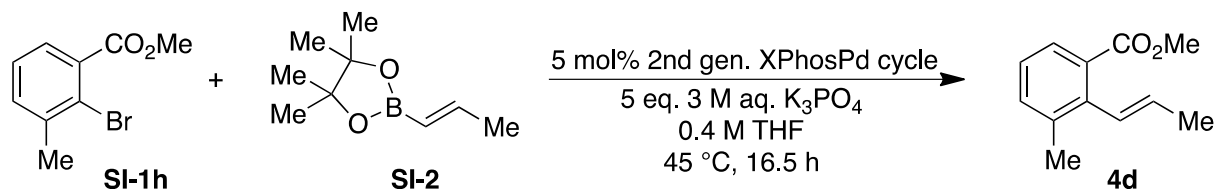

**methyl (*E*)-3-methyl-2-(prop-1-en-1-yl)benzoate 4d.** Following the “general procedure for the synthesis of substrates 4a-o”, methyl 2-bromo-3-methylbenzoate **SI-1h** (573 mg, 2.5 mmol, 1.0 eq.), *trans*-1-propenylboronic acid pinacol ester **SI-2** (462 mg, 2.8 mmol, 1.1 eq.), and 2<sup>nd</sup> generation XPhosPd cycle (98 mg, 0.13 mmol, 5 mol%) were reacted in THF (6.2 mL, 0.4 M) and 3 M aqueous  $\text{K}_3\text{PO}_4$  (4.0 mL, 5 eq.) at 45 °C for 16.5 h. Brine (40 mL) and  $\text{Et}_2\text{O}$  (40 mL) were used in the workup. Alkene **4d** was isolated as a pale yellow solid (443 mg, 93% yield).

TLC (hexanes:EtOAc 6:1)

$R_f$  = 0.46, stained by  $\text{KMnO}_4$

$^1\text{H}$ -NMR (500 MHz,  $\text{CDCl}_3$ )

$\delta$  7.52 (d,  $J$  = 8.0 Hz, 1H), 7.30 (d,  $J$  = 7.5 Hz, 1H), 7.17 (t,  $J$  = 7.5 Hz, 1H), 6.63 (d,  $J$  = 16.0 Hz, 1H), 5.64 (dq,  $J$  = 16.0, 6.5 Hz, 1H), 3.85 (s, 3H), 2.34 (s, 3H), 1.90 (dd,  $J$  = 6.5, 1.5 Hz, 3H).

$^{13}\text{C}$ -NMR (125 MHz,  $\text{CDCl}_3$ )

$\delta$  169.8, 138.1, 136.9, 132.9, 131.3, 130.2, 128.3, 126.8, 126.1, 52.0, 20.7, 18.8.

HRMS (ESI+)

Calculated for  $\text{C}_{12}\text{H}_{14}\text{O}_2$  ( $\text{M}+\text{H}$ ) $^+$ : 191.1067

Found: 191.1073

IR (thin film,  $\text{cm}^{-1}$ )

3019, 2949, 2916, 1720, 1434, 1283, 1262, 1208, 1190, 1172, 1132, 1092, 1013, 964, 939, 782, 746

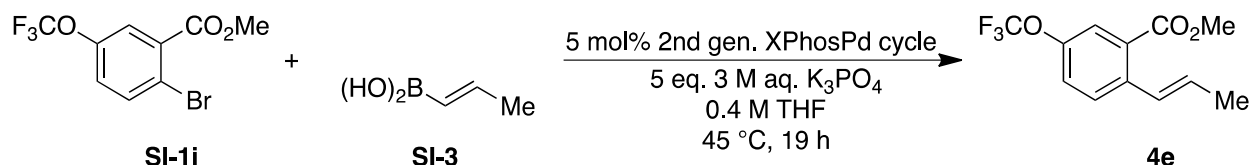

**methyl (*E*)-2-(prop-1-en-1-yl)-5-(trifluoromethoxy)benzoate 4e.** Following the “general procedure for the synthesis of substrates 4a-o”, methyl 2-bromo-5-(trifluoromethoxy)benzoate **SI-1i** (748 mg, 2.5 mmol, 1.0 eq.), *trans*-1-propenylboronic acid **SI-3** (300 mg, 3.5 mmol, 1.4 eq.), and 2<sup>nd</sup> generation XPhosPd cycle (98 mg, 0.13 mmol, 5 mol%) were reacted in THF (6.2 mL, 0.4 M) and 3 M aqueous K<sub>3</sub>PO<sub>4</sub> (4.0 mL, 5 eq.) at 45 °C for 19 h. Brine (40 mL) and Et<sub>2</sub>O (40 mL) were used in the workup. Alkene **4e** was isolated as a pale yellow oil (545 mg, 84% yield).

TLC (hexanes:EtOAc 4:1)

R<sub>f</sub> = 0.30, stained by KMnO<sub>4</sub>

<sup>1</sup>H-NMR (500 MHz, CDCl<sub>3</sub>)

δ 7.72 (s, 1H), 7.55 (d, *J* = 8.5 Hz, 1H), 7.31 (d, *J* = 7.5 Hz, 1H), 7.15 (d, *J* = 15.5 Hz, 1H), 6.16 (ddq, 15.5, 7.0, 1.5 Hz, 1H), 3.93 (s, 3H), 1.94 (dt, *J* = 6.5, 2.0 Hz, 3H).

<sup>13</sup>C-NMR (125 MHz, CDCl<sub>3</sub>)

δ 166.6, 147.4, 138.6, 129.9, 129.1, 128.8, 128.5, 124.5, 122.7, 120.4 (d, *J* = 258 Hz), 52.3 (d, *J* = 3.5 Hz), 18.8.

<sup>19</sup>F-NMR (470 MHz, CDCl<sub>3</sub>)

δ -58.0.

HRMS (ESI+)

Calculated for C<sub>12</sub>H<sub>11</sub>F<sub>3</sub>O<sub>3</sub> (M+H)<sup>+</sup>: 261.0733

Found: 261.0726

IR (thin film, cm<sup>-1</sup>)

2955, 2918, 2855, 1726, 1491, 1437, 1247, 1204, 1157, 1099, 1071, 991, 964, 944, 845, 776

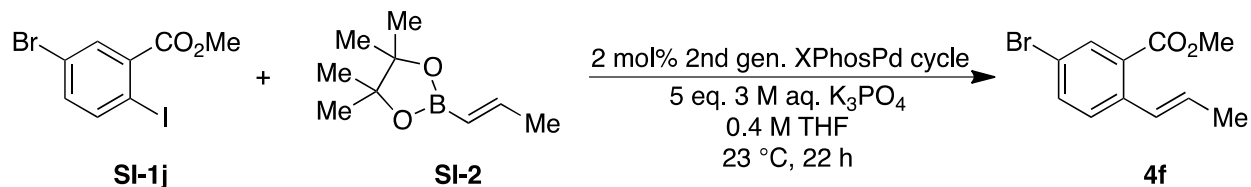

**methyl (*E*)-5-bromo-2-(prop-1-en-1-yl)benzoate 4f.** Following the “general procedure for the synthesis of substrates 4a-o”, methyl 5-bromo-2-iodobenzoate **SI-1j** (852 mg, 2.5 mmol, 1.0 eq.),

*trans*-1-propenylboronic acid pinacol ester **SI-2** (420 mg, 2.5 mmol, 1.0 eq.), and 2<sup>nd</sup> generation XPhosPd cycle (39 mg, 0.05 mmol, 2 mol%) were reacted in THF (6.2 mL, 0.4 M) and 3 M aqueous K<sub>3</sub>PO<sub>4</sub> (4.0 mL, 5 eq.) at 23 °C for 22 h. Brine (40 mL) and Et<sub>2</sub>O (40 mL) were used in the workup. Alkene **4f** was isolated as a pale yellow oil (408 mg, 64% yield, 85% purity).

TLC (hexanes:EtOAc 6:1)

R<sub>f</sub> = 0.55, stained by KMnO<sub>4</sub>

<sup>1</sup>H-NMR (500 MHz, CDCl<sub>3</sub>)

δ 7.99 (d, *J* = 2.0 Hz, 1H), 7.55 (dd, *J* = 8.5, 2.5 Hz, 1H), 7.40 (d, *J* = 9.0 Hz, 1H), 7.11 (dd, *J* = 16.0, 1.5 Hz, 1H), 6.17 (dq, *J* = 16.0, 6.5 Hz, 1H), 3.92 (s, 3H), 1.93 (dd, *J* = 7.0, 2.0 Hz, 3H).

<sup>13</sup>C-NMR (125 MHz, CDCl<sub>3</sub>)

δ 166.7, 142.6, 138.6, 134.8, 133.1, 129.5, 128.7, 128.6, 120.0, 52.3, 18.8.

HRMS (ESI+)

Calculated for C<sub>11</sub>H<sub>11</sub>BrO<sub>2</sub> (M+H)<sup>+</sup>: 255.0015

Found: 255.0008

IR (thin film, cm<sup>-1</sup>)

3010, 2949, 2912, 2875, 2850, 1720, 1475, 1434, 1282, 1235, 1204, 1143, 1103, 1074, 964, 839, 774

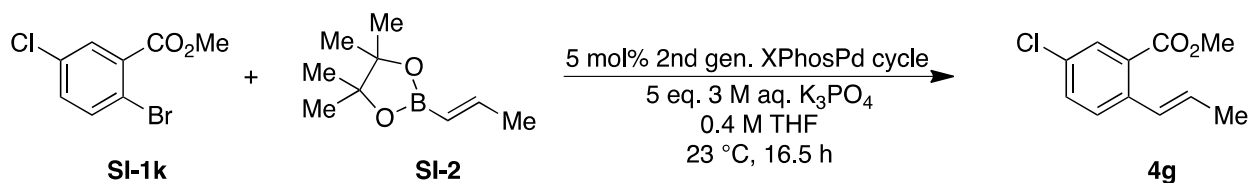

**methyl (*E*)-5-chloro-2-(prop-1-en-1-yl)benzoate 4g.** Following the “general procedure for the synthesis of substrates 4a-o”, methyl 2-bromo-5-chlorobenzoate **SI-1k** (624 mg, 2.5 mmol, 1.0 eq.), *trans*-1-propenylboronic acid pinacol ester **SI-2** (420 mg, 2.8 mmol, 1.0 eq.), and 2<sup>nd</sup> generation XPhosPd cycle (98 mg, 0.13 mmol, 5 mol%) were reacted in THF (6.2 mL, 0.4 M) and 3 M aqueous K<sub>3</sub>PO<sub>4</sub> (4.0 mL, 5 eq.) at 23 °C for 16.5 h. Brine (40 mL) and Et<sub>2</sub>O (40 mL) were used in the workup. Alkene **4g** was isolated as a pale yellow solid (508 mg, 96% yield).

TLC (hexanes:EtOAc 6:1)

R<sub>f</sub> = 0.59, stained by KMnO<sub>4</sub>

<sup>1</sup>H-NMR (500 MHz, CDCl<sub>3</sub>)

δ 7.84 (d, *J* = 2.5 Hz, 1H), 7.47 (d, *J* = 8.5 Hz, 1H), 7.40 (dd, *J* = 8.5, 2.0 Hz, 1H), 7.12 (dd, *J* = 16.0, 2.0 Hz, 1H), 6.16 (dq, *J* = 15.5, 6.5 Hz, 1H), 3.91 (s, 3H), 1.93 (dd, *J* = 6.5, 1.5 Hz, 3H).

$^{13}\text{C}$ -NMR (125 MHz,  $\text{CDCl}_3$ )

$\delta$  166.8, 138.2, 132.2, 132.0, 130.1, 129.4, 129.1, 128.6, 128.5, 52.3, 18.8.

HRMS (ESI+)

Calculated for  $\text{C}_{11}\text{H}_{11}\text{ClO}_2$  (M+H) $^+$ : 211.0520

Found: 211.0515

IR (thin film,  $\text{cm}^{-1}$ )

3011, 2913, 2878, 1721, 1476, 1434, 1284, 1232, 1204, 1142, 1112, 1098, 1073, 964, 840, 774, 727

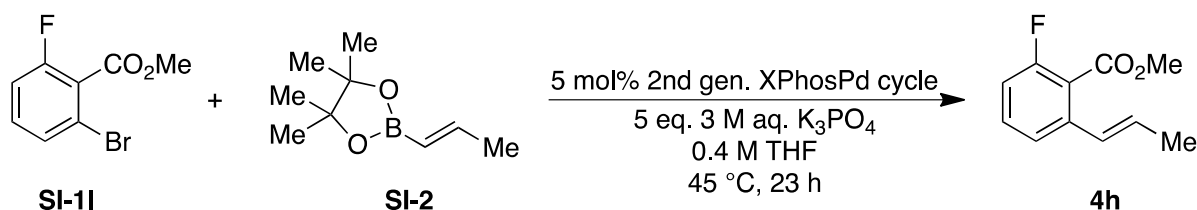

**methyl (*E*)-2-fluoro-6-(prop-1-en-1-yl)benzoate **4h**.** Following the “general procedure for the synthesis of substrates 4a-o”, methyl 2-bromo-6-fluorobenzoate **SI-11** (583 mg, 2.5 mmol, 1.0 eq.), *trans*-1-propenylboronic acid pinacol ester **SI-2** (462 mg, 2.8 mmol, 1.1 eq.), and 2<sup>nd</sup> generation XPhosPd cycle (98 mg, 0.13 mmol, 5 mol%) were reacted in THF (6.2 mL, 0.4 M) and 3 M aqueous  $\text{K}_3\text{PO}_4$  (4.0 mL, 5 eq.) at 45 °C for 23 h. Brine (40 mL) and  $\text{Et}_2\text{O}$  (40 mL) were used in the workup. Alkene **4h** was isolated as a pale yellow oil (367 mg, 76% yield).

TLC (hexanes:EtOAc 6:1)

$R_f$  = 0.62, stained by  $\text{KMnO}_4$

$^1\text{H}$ -NMR (500 MHz,  $\text{CDCl}_3$ )

$\delta$  7.36-7.26 (m, 2H), 6.99-6.94 (m, 1H), 6.52 (dd,  $J$  = 15.5, 1.5 Hz, 1H), 6.26 (dq,  $J$  = 15.5, 6.5 Hz, 1H), 3.96 (s, 3H), 1.90 (dd,  $J$  = 6.5, 1.5 Hz, 3H).

$^{13}\text{C}$ -NMR (125 MHz,  $\text{CDCl}_3$ )

$\delta$  166.2, 159.9 (d,  $J$  = 250.0 Hz), 138.6, 131.2 (d,  $J$  = 9.0 Hz), 130.3, 127.0 (d,  $J$  = 2.5 Hz), 121.3 (d,  $J$  = 3.0 Hz), 119.8 (d,  $J$  = 16.0 Hz), 113.7 (d,  $J$  = 22.0 Hz), 52.6, 18.8.

$^{19}\text{F}$ -NMR (470 MHz,  $\text{CDCl}_3$ )

$\delta$  -115.1 (dd,  $J$  = 9.5, 5.5 Hz).

HRMS (ESI+)

Calculated for  $\text{C}_{11}\text{H}_{11}\text{FO}_2$  (M+H) $^+$ : 195.0816

Found: 195.0815

IR (thin film,  $\text{cm}^{-1}$ )

3037, 2953, 2916, 1729, 1611, 1568, 1467, 1431, 1284, 1269, 1240, 1106, 1059, 958, 918, 830, 773, 764, 536

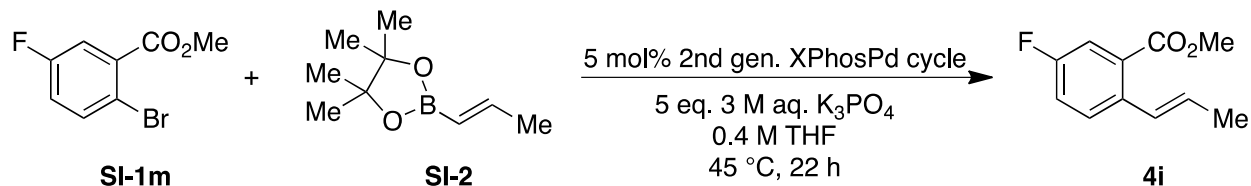

**methyl (*E*)-5-fluoro-2-(prop-1-en-1-yl)benzoate 4i.** Following the “general procedure for the synthesis of substrates 4a-o”, methyl 2-bromo-5-fluorobenzoate **SI-1m** (583 mg, 2.5 mmol, 1.0 eq.), *trans*-1-propenylboronic acid pinacol ester **SI-2** (462 mg, 2.8 mmol, 1.1 eq.), and 2<sup>nd</sup> generation XPhosPd cycle (98 mg, 0.13 mmol, 5 mol%) were reacted in THF (6.2 mL, 0.4 M) and 3 M aqueous K<sub>3</sub>PO<sub>4</sub> (4.0 mL, 5 eq.) at 45 °C for 22 h. Brine (40 mL) and Et<sub>2</sub>O (40 mL) were used in the workup. Alkene **4i** was isolated as a pale yellow oil (480 mg, 99% yield).

TLC (hexanes:EtOAc 9:1)

R<sub>f</sub> = 0.49, stained by KMnO<sub>4</sub>

<sup>1</sup>H-NMR (500 MHz, CDCl<sub>3</sub>)

δ 7.53 (dd, *J* = 9.5, 3.0 Hz, 1H), 7.47 (dd, *J* = 8.5, 5.5 Hz, 1H), 7.17-7.06 (m, 2H), 6.07 (dq, *J* = 15.5, 6.5 Hz, 1H), 3.89 (s, 3H), 1.90 (dd, *J* = 7.0, 2.0 Hz, 3H).

<sup>13</sup>C-NMR (125 MHz, CDCl<sub>3</sub>)

δ 166.8 (d, *J* = 2.5 Hz), 161.0 (d, *J* = 249.5 Hz), 136.0 (d, *J* = 4.0 Hz), 129.2 (d, *J* = 8.0 Hz), 129.0 (d, *J* = 7.0 Hz), 128.7, 128.6 (d, *J* = 1.5 Hz), 119.2 (d, *J* = 22.0 Hz), 116.8 (d, *J* = 23.0 Hz), 52.2, 18.7.

<sup>19</sup>F-NMR (470 MHz, CDCl<sub>3</sub>)

δ -115.6 (m).

HRMS (ESI+)

Calculated for C<sub>11</sub>H<sub>11</sub>FO<sub>2</sub> (M+H)<sup>+</sup>: 195.0816

Found: 195.0812

IR (thin film, cm<sup>-1</sup>)

3011, 2953, 2915, 2853, 1723, 1488, 1435, 1290, 1271, 1249, 1207, 1183, 1097, 1064, 982, 964, 887, 841, 775

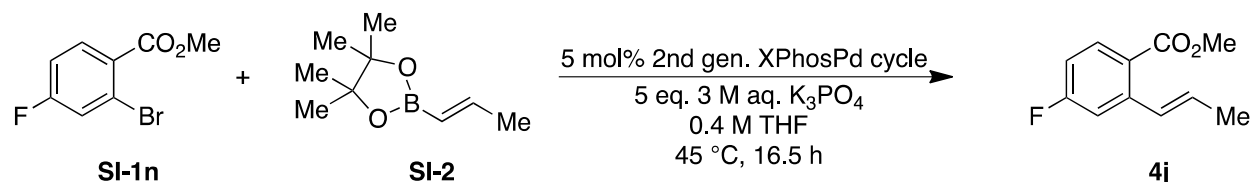

**methyl (*E*)-4-fluoro-2-(prop-1-en-1-yl)benzoate 4j.** Following the “general procedure for the synthesis of substrates 4a-o”, methyl 2-bromo-4-fluorobenzoate **SI-1n** (583 mg, 2.5 mmol, 1.0 eq.), *trans*-1-propenylboronic acid pinacol ester **SI-2** (462 mg, 2.8 mmol, 1.1 eq.), and 2<sup>nd</sup> generation XPhosPd cycle (98 mg, 0.13 mmol, 5 mol%) were reacted in THF (6.2 mL, 0.4 M)

and 3 M aqueous  $K_3PO_4$  (4.0 mL, 5 eq.) at 23 °C for 16.5 h. Brine (40 mL) and  $Et_2O$  (40 mL) were used in the workup. Alkene **4j** was isolated as a pale yellow solid (440 mg, 91% yield).

TLC (hexanes:EtOAc 6:1)

$R_f$  = 0.55, stained by  $KMnO_4$

$^1H$ -NMR (500 MHz,  $CDCl_3$ )

$\delta$  7.88 (dd,  $J$  = 8.5, 6.0 Hz, 1H), 7.23-7.16 (m, 2H), 6.95-6.89 (m, 1H), 6.16 (dq,  $J$  = 16.0, 6.5 Hz, 1H), 3.88 (s, 3H), 1.92 (dd,  $J$  = 6.5, 1.5 Hz, 3H).

$^{13}C$ -NMR (125 MHz,  $CDCl_3$ )

$\delta$  167.0, 164.8 (d,  $J$  = 253.0 Hz), 143.0 (d,  $J$  = 8.5 Hz), 133.0 (d,  $J$  = 9.5 Hz), 129.9, 128.9 (d,  $J$  = 2.5 Hz), 123.9 (d,  $J$  = 2.0 Hz), 113.7 (d,  $J$  = 19.0 Hz), 113.5 (d,  $J$  = 18.5 Hz), 52.0, 18.7.

$^{19}F$ -NMR (470 MHz,  $CDCl_3$ )

$\delta$  -107.6.

HRMS (ESI+)

Calculated for  $C_{11}H_{11}FO_2$  (M+H) $^+$ : 195.0816

Found: 195.0819

IR (thin film,  $cm^{-1}$ )

3012, 2953, 2914, 2854, 1719, 1606, 1577, 1434, 1279, 1242, 1219, 1189, 1163, 1115, 1099, 1075, 960, 874, 771

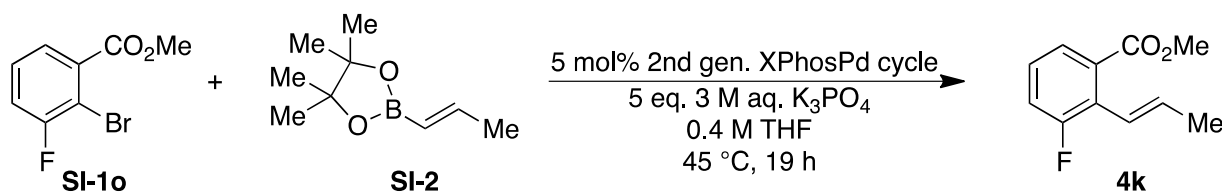

**methyl (*E*)-3-fluoro-2-(prop-1-en-1-yl)benzoate 4k.** Following the “general procedure for the synthesis of substrates 4a-o”, methyl 2-bromo-3-fluorobenzoate **SI-10** (583 mg, 2.5 mmol, 1.0 eq.), *trans*-1-propenylboronic acid pinacol ester **SI-2** (462 mg, 2.8 mmol, 1.1 eq.), and 2<sup>nd</sup> generation XPhosPd cycle (98 mg, 0.13 mmol, 5 mol%) were reacted in THF (6.2 mL, 0.4 M) and 3 M aqueous  $K_3PO_4$  (4.0 mL, 5 eq.) at 45 °C for 19 h. Brine (40 mL) and  $Et_2O$  (40 mL) were used in the workup. Alkene **4k** was isolated as a pale yellow oil (465 mg, 96% yield).

TLC (hexanes:EtOAc 9:1)

$R_f$  = 0.49, stained by  $KMnO_4$

$^1H$ -NMR (500 MHz,  $CDCl_3$ )

$\delta$  7.57-7.51 (m, 1H), 7.23-7.14 (m, 2H), 6.68 (d,  $J$  = 16.0 Hz, 1H), 6.25 (ddq,  $J$  = 15.5, 7.0, 2.0 Hz, 1H), 3.89 (s, 3H), 1.93 (d,  $J$  = 7.0 Hz, 3H).

$^{13}\text{C}$ -NMR (125 MHz,  $\text{CDCl}_3$ )

$\delta$  167.7 (d,  $J = 4.0$  Hz), 160.6 (d,  $J = 247.5$  Hz), 133.6 (d,  $J = 10.0$  Hz), 131.4 (d,  $J = 4.0$  Hz), 127.0 (d,  $J = 9.5$  Hz), 126.7 (d,  $J = 14.5$  Hz), 125.6 (d,  $J = 4.0$  Hz), 122.2, 119.1 (d,  $J = 24.0$  Hz), 52.2, 19.5.

$^{19}\text{F}$ -NMR (470 MHz,  $\text{CDCl}_3$ )

$\delta$  -114.2 (t,  $J = 8.0$  Hz).

HRMS (ESI+)

Calculated for  $\text{C}_{11}\text{H}_{11}\text{FO}_2$  ( $\text{M}+\text{H}$ ) $^+$ : 195.0816

Found: 195.0821

IR (thin film,  $\text{cm}^{-1}$ )

2953, 2915, 2853, 1721, 1454, 1433, 1287, 1257, 1194, 1174, 1140, 1099, 1001, 965, 900, 773, 753

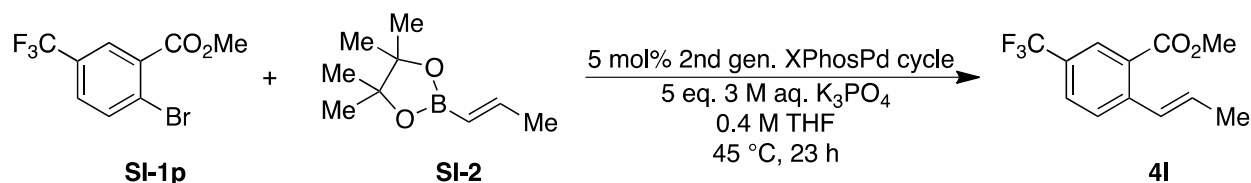

**methyl (*E*)-2-(prop-1-en-1-yl)-5-(trifluoromethyl)benzoate 4I.** Following the “general procedure for the synthesis of substrates 4a-o”, methyl 2-bromo-5-(trifluoromethyl)benzoate **SI-1p** (708 mg, 2.5 mmol, 1.0 eq.), *trans*-1-propenylboronic acid pinacol ester **SI-2** (462 mg, 2.8 mmol, 1.1 eq.), and 2<sup>nd</sup> generation XPhosPd cycle (98 mg, 0.13 mmol, 5 mol%) were reacted in THF (6.2 mL, 0.4 M) and 3 M aqueous  $\text{K}_3\text{PO}_4$  (4.0 mL, 5 eq.) at 45 °C for 23 h. Brine (40 mL) and  $\text{Et}_2\text{O}$  (40 mL) were used in the workup. Alkene **4I** was isolated as a pale yellow oil (526 mg, 86% yield).

TLC (hexanes:EtOAc 6:1)

$R_f = 0.68$ , stained by  $\text{KMnO}_4$

$^1\text{H}$ -NMR (500 MHz,  $\text{CDCl}_3$ )

$\delta$  8.11 (s, 1H), 7.68-7.61 (m, 2H), 7.20 (d,  $J = 16.0$  Hz, 1H), 6.26 (dq,  $J = 16.0, 6.5$  Hz, 1H), 3.93 (s, 3H), 1.95 (dd,  $J = 7.0, 1.5$  Hz, 3H).

$^{13}\text{C}$ -NMR (125 MHz,  $\text{CDCl}_3$ )

$\delta$  166.7, 143.1, 131.4, 128.6, 128.2, 127.9 (dq,  $J = 102.0, 3.5$  Hz) 127.6, 124.8, 122.7, 110.0, 52.3, 18.9.

$^{19}\text{F}$ -NMR (470 MHz,  $\text{CDCl}_3$ )

$\delta$  -62.7.

HRMS (ESI+)

Calculated for  $\text{C}_{12}\text{H}_{11}\text{F}_3\text{O}_2$  ( $\text{M}+\text{H}$ ) $^+$ : 245.0784



Found: 245.0778

IR (thin film,  $\text{cm}^{-1}$ )

2955, 2917, 1725, 1336, 1273, 1236, 1211, 1168, 1120, 1101, 1084, 1075, 961, 848, 777, 691

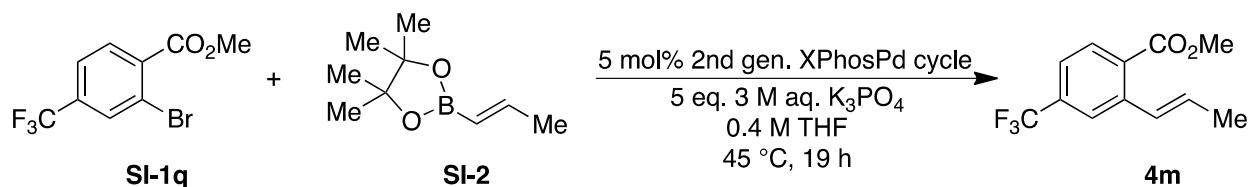

**methyl (E)-2-(prop-1-en-1-yl)-4-(trifluoromethyl)benzoate 4m.** Following the “general procedure for the synthesis of substrates 4a-o”, methyl 2-bromo-4-(trifluoromethyl)benzoate **SI-1q** (708 mg, 2.5 mmol, 1.0 eq.), *trans*-1-propenylboronic acid pinacol ester **SI-2** (462 mg, 2.8 mmol, 1.1 eq.), and 2<sup>nd</sup> generation XPhosPd cycle (98 mg, 0.13 mmol, 5 mol%) were reacted in THF (6.2 mL, 0.4 M) and 3 M aqueous  $\text{K}_3\text{PO}_4$  (4.0 mL, 5 eq.) at 45 °C for 19 h. Brine (40 mL) and  $\text{Et}_2\text{O}$  (40 mL) were used in the workup. Alkene **4m** was isolated as a pale yellow oil (573 mg, 94% yield).

TLC (hexanes:EtOAc 9:1)

$R_f$  = 0.57, stained by  $\text{KMnO}_4$

$^1\text{H-NMR}$  (500 MHz,  $\text{CDCl}_3$ )

$\delta$  7.93 (d,  $J$  = 8.0 Hz, 1H), 7.78 (s, 1H), 7.49 (d,  $J$  = 8.0 Hz, 1H), 7.15 (dq,  $J$  = 15.5, 2.0 Hz, 1H), 6.26 (dq,  $J$  = 15.5, 6.5 Hz, 1H), 3.94 (s, 3H), 1.96 (dd,  $J$  = 7.0, 2.0 Hz, 3H).

$^{13}\text{C-NMR}$  (125 MHz,  $\text{CDCl}_3$ )

$\delta$  167.0, 140.2, 133.5 (q,  $J$  = 32.0 Hz), 131.0, 130.8, 130.7, 128.4, 124.7, 123.4 (dq,  $J$  = 133.0, 4.5 Hz), 122.5, 52.4 (d,  $J$  = 2.0 Hz), 18.8.

$^{19}\text{F-NMR}$  (470 MHz,  $\text{CDCl}_3$ )

$\delta$  -63.3.

HRMS (ESI+)

Calculated for  $\text{C}_{12}\text{H}_{11}\text{F}_3\text{O}_2$  ( $\text{M}+\text{H}$ )<sup>+</sup>: 245.0784

Found: 245.0788

IR (thin film,  $\text{cm}^{-1}$ )

2955, 2917, 2856, 1725, 1335, 1312, 1289, 1276, 1245, 1167, 1124, 1089, 961, 894, 846, 776, 754, 707

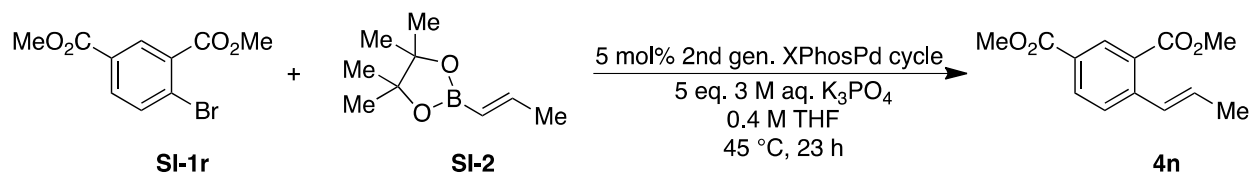

**dimethyl (*E*)-4-(prop-1-en-1-yl)isophthalate 4n.** Following the “general procedure for the synthesis of substrates 4a-o”, dimethyl 4-bromoisophthalate **SI-1r** (683 mg, 2.5 mmol, 1.0 eq.), *trans*-1-propenylboronic acid pinacol ester **SI-2** (462 mg, 2.8 mmol, 1.1 eq.), and 2<sup>nd</sup> generation XPhosPd cycle (98 mg, 0.13 mmol, 5 mol%) were reacted in THF (6.2 mL, 0.4 M) and 3 M aqueous K<sub>3</sub>PO<sub>4</sub> (4.0 mL, 5 eq.) at 45 °C for 23 h. Brine (40 mL) and Et<sub>2</sub>O (40 mL) were used in the workup. Alkene **4n** was isolated as a pale yellow solid (437 mg, 75% yield).

TLC (hexanes:EtOAc 6:1)

R<sub>f</sub> = 0.49, stained by KMnO<sub>4</sub>

<sup>1</sup>H-NMR (500 MHz, CDCl<sub>3</sub>)

δ 8.50 (d, *J* = 1.5 Hz, 1H), 8.06 (dd, *J* = 8.0, 2.0 Hz, 1H), 7.60 (d, *J* = 8.0 Hz, 1H), 7.21 (dd, *J* = 16.0, 2.0 Hz, 1H), 6.30 (dq, *J* = 15.5, 6.5 Hz, 1H), 3.92 (s, 6H), 1.95 (dd, *J* = 6.5, 1.5 Hz, 3H).

<sup>13</sup>C-NMR (125 MHz, CDCl<sub>3</sub>)

δ 167.2, 166.2, 143.9, 132.5, 131.8, 131.4, 128.9, 128.1, 128.0, 127.1, 52.2, 19.0.

HRMS (ESI+)

Calculated for C<sub>13</sub>H<sub>14</sub>O<sub>4</sub> (M+H)<sup>+</sup>: 235.0965

Found: 235.0972

IR (thin film, cm<sup>-1</sup>)

3001, 2952, 2913, 1716, 1607, 1433, 1305, 1262, 1226, 1142, 1116, 1099, 1073, 990, 962, 754

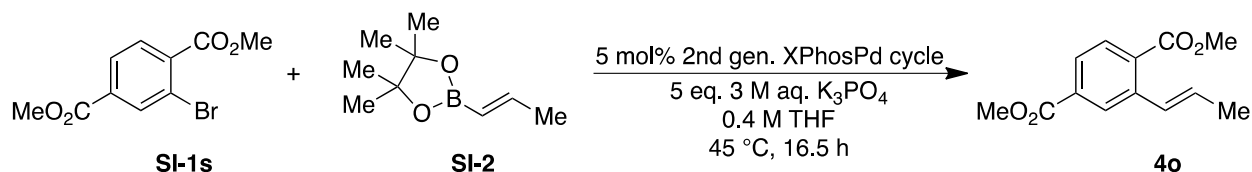

**dimethyl (*E*)-2-(prop-1-en-1-yl)terephthalate 4o.** Following the “general procedure for the synthesis of substrates 4a-o”, dimethyl 2-bromoterephthalate **SI-1s** (683 mg, 2.5 mmol, 1.0 eq.), *trans*-1-propenylboronic acid pinacol ester **SI-2** (462 mg, 2.8 mmol, 1.1 eq.), and 2<sup>nd</sup> generation XPhosPd cycle (98 mg, 0.13 mmol, 5 mol%) were reacted in THF (6.2 mL, 0.4 M) and 3 M aqueous K<sub>3</sub>PO<sub>4</sub> (4.0 mL, 5 eq.) at 45 °C for 16.5 h. Brine (40 mL) and Et<sub>2</sub>O (40 mL) were used in the workup. Alkene **4o** was isolated as a white solid (586 mg, 99% yield).

TLC (hexanes:EtOAc 6:1)

$R_f = 0.39$ , stained by  $\text{KMnO}_4$

$^1\text{H-NMR}$  (500 MHz,  $\text{CDCl}_3$ )

$\delta$  8.14 (s, 1H), 7.84-7.79 (m, 2H), 7.07 (d,  $J = 16.5$  Hz, 1H), 6.23 (dq,  $J = 16.0, 6.5$  Hz, 1H), 3.88 (s, 3H), 3.87 (s, 3H), 1.89 (dd,  $J = 7.0, 1.5$  Hz, 3H).

$^{13}\text{C-NMR}$  (125 MHz,  $\text{CDCl}_3$ )

$\delta$  167.3, 166.2, 139.6, 132.8, 131.6, 130.2, 130.0, 128.6, 128.2, 127.0, 52.3, 52.2, 18.8.

HRMS (ESI+)

Calculated for  $\text{C}_{13}\text{H}_{14}\text{O}_4$  ( $\text{M}+\text{H}$ ) $^+$ : 235.0965

Found: 235.0971

IR (thin film,  $\text{cm}^{-1}$ )

3002, 2952, 2914, 2852, 1717, 1433, 1287, 1237, 1200, 1110, 1073, 962, 747, 730

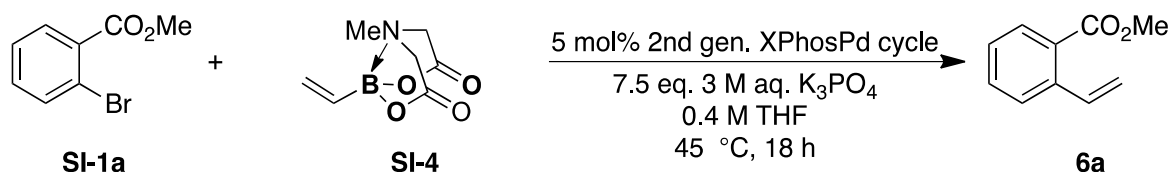

**Methyl 2-vinylbenzoate 6a.** Following the “general procedure for the synthesis of substrates 6a-h”, methyl 2-bromobenzoate **SI-1a** (968 mg, 4.5 mmol, 1.0 eq.), vinylboronic acid MIDA ester **SI-4** (906 mg, 5.0 mmol, 1.1 eq.), and 2<sup>nd</sup> generation XPhosPd cycle (177 mg, 0.23 mmol, 5 mol%) were reacted in THF (11.0 mL, 0.4 M) and 3 M aqueous  $\text{K}_3\text{PO}_4$  (11.0 mL, 7.5 eq.) at 45 °C for 18 h. Brine (40 mL) and  $\text{Et}_2\text{O}$  (40 mL) were used in the workup. Alkene **6a** was isolated as a pale yellow oil (569 mg, 78% yield). Characterization of this compound was consistent with previously reported data.<sup>5</sup>

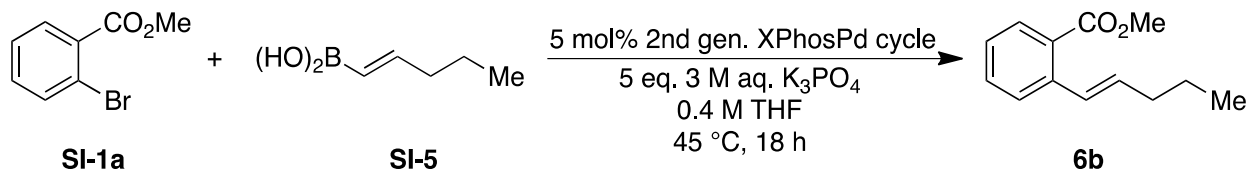

**Methyl (*E*)-2-(pent-1-en-1-yl)benzoate 6b.** Following the “general procedure for the synthesis of substrates 6a-h”, methyl 2-bromobenzoate **SI-1a** (857 mg, 4.0 mmol, 1.0 eq.), 1-penten-1-ylboronic acid **SI-5** (500 mg, 4.4 mmol, 1.1 eq.), and 2<sup>nd</sup> generation XPhosPd cycle (157 mg, 0.20 mmol, 5 mol%) were reacted in THF (10 mL, 0.4 M) and 3 M aqueous  $\text{K}_3\text{PO}_4$  (6.6 mL, 5 eq.) at 45 °C for 18 h. Brine (40 mL) and  $\text{Et}_2\text{O}$  (40 mL) were used in the workup. Alkene **6b** was isolated as a pale yellow oil (780 mg, 96% yield). Characterization of this compound was consistent with previously reported data.<sup>6</sup>

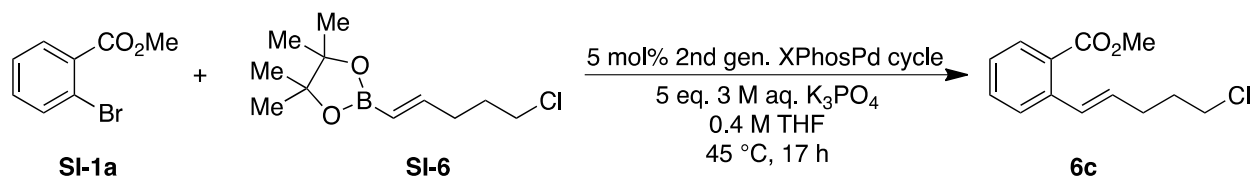

**Methyl (*E*)-2-(5-chloropent-1-en-1-yl)benzoate 6c.** Following the “general procedure for the synthesis of substrates 6a-h”, methyl 2-bromobenzoate **SI-1a** (645 mg, 3.0 mmol, 1.0 eq.), *trans*-5-chloro-1-penten-1-ylboronic acid pinacol ester **SI-6** (760 mg, 3.3 mmol, 1.1 eq.), and 2<sup>nd</sup> generation XPhosPd cycle (118 mg, 0.15 mmol, 5 mol%) were reacted in THF (10.0 mL, 0.3 M) and 3 M aqueous K<sub>3</sub>PO<sub>4</sub> (5.0 mL, 5 eq.) at 45 °C for 17 h. Brine (40 mL) and Et<sub>2</sub>O (40 mL) were used in the workup. Alkene **6c** was isolated as a pale yellow oil (659 mg, 92% yield).

TLC (hexanes:EtOAc 9:1)

R<sub>f</sub> = 0.50, stained by KMnO<sub>4</sub>

<sup>1</sup>H-NMR (500 MHz, CDCl<sub>3</sub>)

δ 7.87 (d, *J* = 8.0 Hz, 1H), 7.53 (d, *J* = 8.0 Hz, 1H), 7.46 (t, *J* = 7.5 Hz, 1H), 7.28 (t, *J* = 7.5 Hz, 1H), 7.20 (d, *J* = 16.0 Hz, 1H), 6.13-6.05 (m, 1H), 3.91 (s, 3H), 3.62 (t, *J* = 7.0 Hz, 2H), 2.43 (q, *J* = 7.0 Hz, 2H), 1.99 (p, *J* = 7.0 Hz, 2H).

<sup>13</sup>C-NMR (125 MHz, CDCl<sub>3</sub>)

δ 167.9, 139.3, 132.0, 131.5, 130.3, 130.0, 128.2, 127.3, 126.8, 52.0, 44.3, 32.0, 30.2.

HRMS (ESI+)

Calculated for C<sub>13</sub>H<sub>15</sub>ClO<sub>2</sub> (M+H)<sup>+</sup>: 239.0833

Found: 239.0841

IR (thin film, cm<sup>-1</sup>)

3063, 2997, 2951, 2846, 1719, 1481, 1434, 1249, 1159, 1075, 966, 745

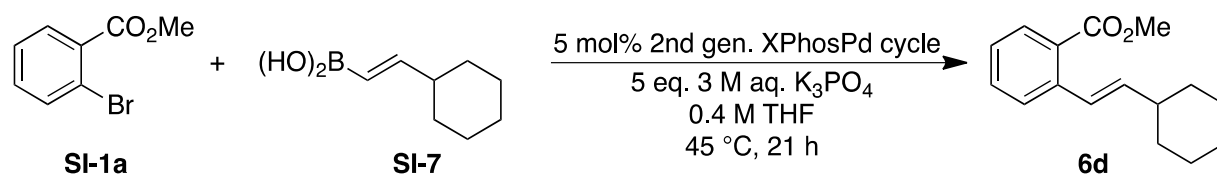

**Methyl (*E*)-2-(2-cyclohexylvinyl)benzoate 6d.** Following the “general procedure for the synthesis of substrates 6a-h”, methyl 2-bromobenzoate **SI-1a** (517 mg, 2.4 mmol, 1.0 eq.), (*E*)-(2-cyclohexylvinyl)boronic acid **SI-7** (407 mg, 2.6 mmol, 1.1 eq.), and 2<sup>nd</sup> generation XPhosPd cycle (95 mg, 0.12 mmol, 5 mol%) were reacted in THF (6.0 mL, 0.4 M) and 3 M aqueous K<sub>3</sub>PO<sub>4</sub> (4.0 mL, 5 eq.) at 45 °C for 21 h. Brine (40 mL) and Et<sub>2</sub>O (40 mL) were used in the workup. Alkene **6d** was isolated as a pale yellow oil (557 mg, 95% yield).

TLC (hexanes:EtOAc 9:1)

R<sub>f</sub> = 0.50, stained by KMnO<sub>4</sub>

<sup>1</sup>H-NMR (500 MHz, CDCl<sub>3</sub>)

δ 7.86 (d, *J* = 8.0 Hz, 1H), 7.56 (d, *J* = 8.0 Hz, 1H), 7.45 (t, *J* = 7.5 Hz, 1H), 7.26 (t, *J* = 7.5 Hz, 1H), 7.14 (d, *J* = 16.0 Hz, 1H), 6.11 (dd, *J* = 16.0, 7.0 Hz, 1H), 3.92 (s, 3H), 2.26-2.15 (m, 1H), 1.90-1.83 (m, 2H), 1.83-1.74 (m, 2H), 1.74-1.66 (m, 1H), 1.42-1.29 (m, 2H), 1.28-1.16 (m, 3H).

<sup>13</sup>C-NMR (125 MHz, CDCl<sub>3</sub>)

δ 168.1, 139.9, 139.6, 131.9, 130.3, 128.2, 127.1, 126.4, 126.1, 52.0, 41.3, 32.9, 26.2, 26.1.

HRMS (ESI+)

Calculated for C<sub>16</sub>H<sub>20</sub>O<sub>2</sub> (M+H)<sup>+</sup>: 245.1536

Found: 245.1541

IR (thin film, cm<sup>-1</sup>)

2923, 2850, 1719, 1448, 1247, 1126, 1075, 966, 903, 725, 649

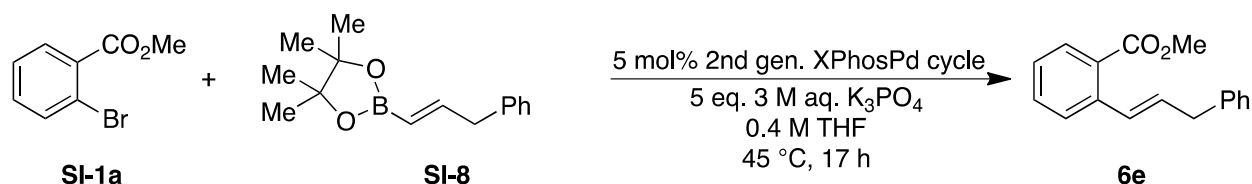

**Methyl (E)-2-(3-phenylprop-1-en-1-yl)benzoate 6e.** Following the “general procedure for the synthesis of substrates 6a-h”, methyl 2-bromobenzoate **SI-1a** (645 mg, 3.0 mmol, 1.0 eq.), trans-3-phenyl-1-propenylboronic acid pinacol ester **SI-8** (806 mg, 3.3 mmol, 1.1 eq.), and 2<sup>nd</sup> generation XPhosPd cycle (118 mg, 0.15 mmol, 5 mol%) were reacted in THF (10 mL, 0.3 M) and 3 M aqueous K<sub>3</sub>PO<sub>4</sub> (5.0 mL, 5 eq.) at 45 °C for 17 h. Brine (40 mL) and Et<sub>2</sub>O (40 mL) were used in the workup. Alkene **6e** was isolated as a pale yellow oil (740 mg, 98% yield).

TLC (hexanes:EtOAc 6:1)

R<sub>f</sub> = 0.59, stained by KMnO<sub>4</sub>

<sup>1</sup>H-NMR (500 MHz, CDCl<sub>3</sub>)

δ 7.88 (d, *J* = 7.5 Hz, 1H), 7.56 (d, *J* = 7.5 Hz, 1H), 7.45 (t, *J* = 7.0 Hz, 1H), 7.38-7.22 (m, 7H), 6.28 (dt, *J* = 15.5, 6.5 Hz, 1H), 3.91 (s, 3H), 3.62 (d, *J* = 6.5 Hz, 2H).

<sup>13</sup>C-NMR (125 MHz, CDCl<sub>3</sub>)

δ 168.1, 140.1, 139.2, 132.0, 131.9, 130.4, 129.9, 128.7, 128.5, 128.3, 127.3, 126.8, 126.2, 52.1, 39.6.

HRMS (ESI+)

Calculated for C<sub>17</sub>H<sub>16</sub>O<sub>2</sub> (M+H)<sup>+</sup>: 253.1223

Found: 253.1235

IR (thin film,  $\text{cm}^{-1}$ )

3062, 3027, 2950, 1719, 1433, 1293, 1251, 1130, 1082, 966, 744, 700

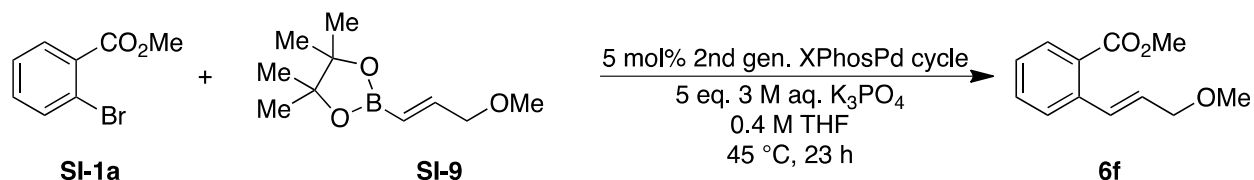

**Methyl (*E*)-2-(3-methoxyprop-1-en-1-yl)benzoate 6f.** Following the “general procedure for the synthesis of substrates 6a-h”, methyl 2-bromobenzoate **SI-1a** (905 mg, 4.2 mmol, 1.0 eq.), trans-3-methoxy-1-propenylboronic acid pinacol ester **SI-9** (1.0 g, 5.0 mmol, 1.1 eq.), and 2<sup>nd</sup> generation XPhosPd cycle (165 mg, 0.21 mmol, 5 mol%) were reacted in THF (10.5 mL, 0.4 M) and 3 M aqueous  $\text{K}_3\text{PO}_4$  (7.0 mL, 5 eq.) at 45 °C for 23 h. Brine (40 mL) and  $\text{Et}_2\text{O}$  (40 mL) were used in the workup. Alkene **6f** was isolated as a pale yellow oil (860 mg, 99% yield). Characterization of this compound was consistent with previously reported data.<sup>7</sup>

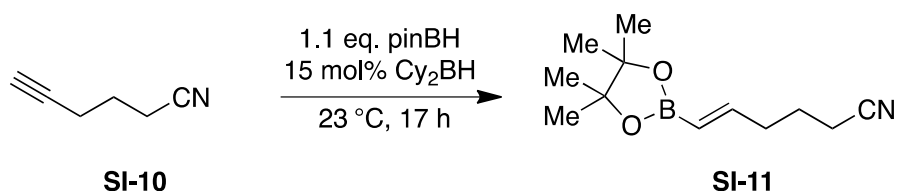

**trans-5-cyano-1-penten-1-ylboronic acid pinacol ester SI-11.** In a glovebox, to a 7 mL vial charged with a stir bar was added dicyclohexyl borane (160 mg, 0.9 mmol, 15 mol%) and pinacol borane (0.96 mL, 6.6 mmol, 1.1 eq.). The vial was capped, removed from the glovebox and placed under a nitrogen atmosphere. The slurry was cooled to 0 °C in an ice bath. Hex-5-ynenitrile **SI-10** (0.63 mL, 6.0 mmol, 1.0 eq.) was added in one portion. The solution was stirred at 23 °C for 17 h. After this time, celite was added to quench the reaction. The crude reaction was dry loaded onto celite and purified by column chromatography on silica gel (hexanes:EtOAc 100:0 → 80:20) to afford the pinacol ester **SI-11** as a clear, colorless oil (1.0 g, 75% yield).

TLC (hexanes:EtOAc 9:1)

 $R_f = 0.17$ , stained by  $\text{KMnO}_4$  $^1\text{H-NMR}$  (500 MHz,  $\text{CDCl}_3$ ) $\delta$  6.52 (dt,  $J = 18.0, 6.5$  Hz, 1H), 5.49 (dt,  $J = 18.0, 1.5$  Hz, 1H), 2.38-2.26 (m, 4H), 1.79 (p, 7.0 Hz, 2H), 1.26 (s, 12H). $^{13}\text{C-NMR}$  (125 MHz,  $\text{CDCl}_3$ ) $\delta$  150.9, 119.4, 83.2, 34.2, 24.8, 23.9, 16.5.

HRMS (ESI+)

Calculated for  $\text{C}_{12}\text{H}_{20}\text{BNO}_2$  ( $\text{M}+\text{H}$ )<sup>+</sup>: 222.1662

Found: 222.1666

IR (thin film,  $\text{cm}^{-1}$ )

2978, 2934, 1638, 1364, 1352, 1321, 1142, 969, 849

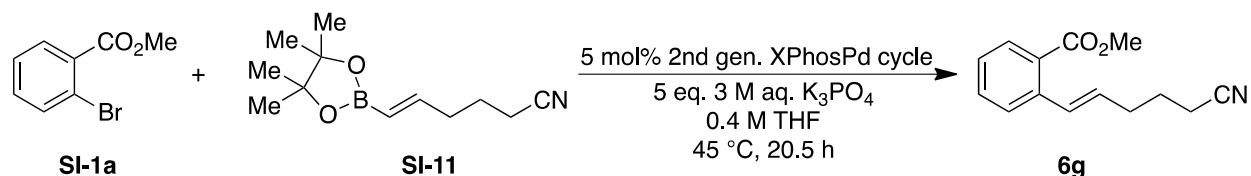

**methyl (*E*)-2-(5-cyanopent-1-en-1-yl)benzoate **6g**.** Following the “general procedure for the synthesis of substrates 6a-h”, methyl 2-bromobenzoate **SI-1a** (538 mg, 2.5 mmol, 1.0 eq.), *trans*-5-cyano-1-penten-1-ylboronic acid pinacol ester **SI-11** (608 mg, 2.8 mmol, 1.1 eq.), and 2<sup>nd</sup> generation XPhosPd cycle (98 mg, 0.13 mmol, 5 mol%) were reacted in THF (6.3 mL, 0.4 M) and 3 M aqueous  $\text{K}_3\text{PO}_4$  (4.0 mL, 5 eq.) at 45 °C for 20.5 h. Brine (40 mL) and  $\text{Et}_2\text{O}$  (40 mL) were used in the workup. Alkene **6g** was isolated as a pale yellow oil (544 mg, 95% yield).

TLC (hexanes:EtOAc 9:1)

 $R_f = 0.13$ , stained by  $\text{KMnO}_4$  $^1\text{H-NMR}$  (500 MHz,  $\text{CDCl}_3$ )

$\delta$  7.87 (dd,  $J = 8.0, 1.5$  Hz, 1H), 7.51 (d,  $J = 8.0$  Hz, 1H), 7.45 (dt,  $J = 7.0, 1.5$  Hz, 1H), 7.29 (dt,  $J = 7.5, 1.5$  Hz, 1H), 7.20 (d,  $J = 16.0$  Hz, 1H), 6.02 (dt,  $J = 16.0, 7.0$  Hz, 1H), 3.90 (s, 3H), 2.46-2.38 (m, 4H), 1.88 (p,  $J = 7.0$  Hz, 2H).

 $^{13}\text{C-NMR}$  (125 MHz,  $\text{CDCl}_3$ )

$\delta$  167.8, 139.1, 132.1, 131.0, 130.4, 130.3, 128.1, 127.3, 127.0, 119.7, 52.1, 31.8, 24.9, 16.4.

HRMS (ESI+)

Calculated for  $\text{C}_{14}\text{H}_{15}\text{NO}_2$  ( $\text{M}+\text{H}$ )<sup>+</sup>: 230.1176

Found: 230.1183

IR (thin film,  $\text{cm}^{-1}$ )

3065, 2998, 2950, 1715, 1433, 1293, 1248, 1129, 1074, 965, 746, 706

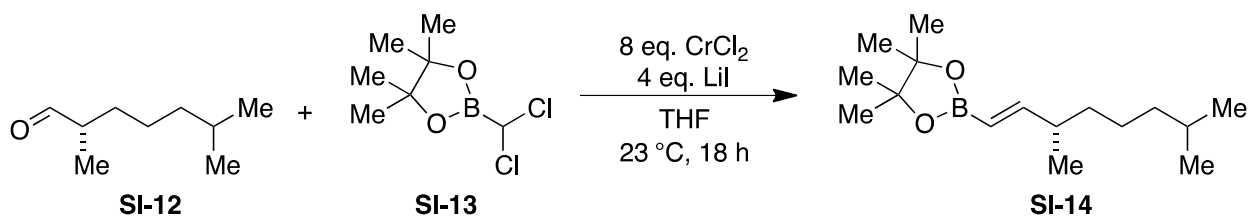

**(*S,E*)-2-(3,7-dimethyloct-1-en-1-yl)-4,4,5,5-tetramethyl-1,3,2-dioxaborolane **SI-14**.** In a glovebox, to a 100 mL round bottom flask charged with a stir bar was added chromium (II) chloride (3.6 g, 29.6 mmol, 8.0 eq). The round bottom was sealed with a septum, removed from the glovebox, and placed under a nitrogen atmosphere. To the flask was added THF (35 mL),

followed by a solution of aldehyde **SI-12** (526 mg, 3.7 mmol, 1.0 eq) and pinacol ester **SI-13** (1.6 g, 7.4 mmol, 2.0 eq) in THF (10 mL). To the resulting suspension was slowly dropwise added a solution of lithium iodide (2.0 g, 15 mmol, 4.0 eq) in THF (5 mL). The resulting suspension was stirred at 23 °C, under a nitrogen atmosphere, in a reduced light environment (shielded with aluminum foil) for 18 h. After this time, the crude reaction was poured into a separatory funnel containing H<sub>2</sub>O (100 mL) and hexanes (75 mL). After shaking, the organic layer was removed and the aqueous layer was extracted with hexanes (2 x 50 mL). The combined organic layers were dried over MgSO<sub>4</sub>, filtered, and dry loaded onto celite for purification by column chromatography on silica gel (hexanes:EtOAc 100:0 → 90:10) to afford pinacol ester **SI-14** as a clear, colorless oil (603 mg, 61% yield).

<sup>1</sup>H-NMR (500 MHz, CDCl<sub>3</sub>)

δ 6.53 (dd, *J* = 18.0, 8.0 Hz, 1H), 5.38 (d, *J* = 18.0 Hz, 1H), 2.25-2.15 (m, 1H), 1.57-1.47 (m, 1H), 1.38-1.23 (m, 4H), 1.28 (s, 12H), 1.20-1.11 (m, 2H), 1.00 (d, *J* = 6.5 Hz, 3H), 0.86 (d, *J* = 6.5 Hz, 6H).

<sup>13</sup>C-NMR (125 MHz, CDCl<sub>3</sub>)

δ 160.2, 83.0, 39.5, 39.0, 36.3, 27.9, 25.0, 24.8, 22.7, 19.5.

HRMS (ESI+)

Calculated for C<sub>16</sub>H<sub>31</sub>BO<sub>2</sub> (M+H)<sup>+</sup>: 267.2493

Found: 267.2501

IR (thin film, cm<sup>-1</sup>)

2977, 2956, 2927, 2869, 1637, 1467, 1397, 1389, 1363, 1318, 1268, 1215, 1165, 1145, 999, 970, 901, 850, 729, 650

[α]<sub>D</sub><sup>23</sup> +12.8 (*c* 1.0, CHCl<sub>3</sub>)

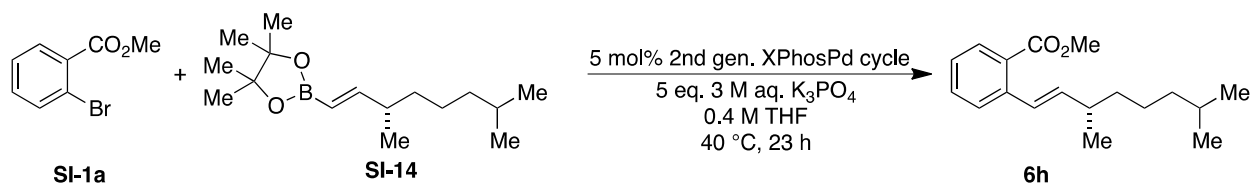

**methyl (S,E)-2-(3,7-dimethyloct-1-en-1-yl)benzoate 6h.** Following the “general procedure for the synthesis of substrates 6a-h”, methyl 2-bromobenzoate **SI-1a** (426 mg, 2.0 mmol, 1.0 eq.), (S,E)-2-(3,7-dimethyloct-1-en-1-yl)-4,4,5,5-tetramethyl-1,3,2-dioxaborolane **SI-14** (580 mg, 2.2 mmol, 1.1 eq.), and 2<sup>nd</sup> generation XPhosPd cycle (78 mg, 0.10 mmol, 5 mol%) were reacted in THF (5.0 mL, 0.4 M) and 3 M aqueous K<sub>3</sub>PO<sub>4</sub> (3.3 mL, 5 eq.) at 40 °C for 23 h. Brine (40 mL) and Et<sub>2</sub>O (40 mL) were used in the workup. Alkene **6h** was isolated as a pale yellow oil (525 mg, 96% yield).

TLC (hexanes:EtOAc 4:1)

R<sub>f</sub> = 0.73, stained by KMnO<sub>4</sub>



$^1\text{H-NMR}$  (500 MHz,  $\text{CDCl}_3$ )

$\delta$  7.86 (d,  $J = 7.5$  Hz, 1H), 7.56 (d,  $J = 7.5$  Hz, 1H), 7.45 (t,  $J = 6.5$  Hz, 1H), 7.27 (t,  $J = 7.0$  Hz, 1H), 7.12 (d,  $J = 16.0$  Hz, 1H), 6.02 (dd,  $J = 16.0, 8.0$  Hz, 1H), 3.91 (s, 3H), 2.42-2.32 (m, 1H), 1.61-1.51 (sept,  $J = 6.5$  Hz, 1H), 1.43-1.31 (m, 4H), 1.24-1.16 (m, 2H), 1.11 (d,  $J = 7.0$  Hz, 3H), 0.89 (d,  $J = 6.5$  Hz, 6H).

$^{13}\text{C-NMR}$  (125 MHz,  $\text{CDCl}_3$ )

$\delta$  168.1, 139.9, 139.8, 131.9, 130.3, 128.2, 127.2, 126.7, 126.4, 51.9, 39.1, 37.4, 37.3, 28.0, 25.1, 22.7, 20.6.

HRMS (ESI+)

Calculated for  $\text{C}_{18}\text{H}_{26}\text{O}_2$  ( $\text{M}+\text{H}$ ) $^+$ : 275.2006  
Found: 275.2006

IR (thin film,  $\text{cm}^{-1}$ )

2952, 2925, 2868, 1722, 1481, 1459, 1433, 1292, 1246, 1206, 1189, 1126, 1076, 967, 749, 707

$[\alpha]_{\text{D}}^{23} +24.2$  ( $c$  1.0,  $\text{CHCl}_3$ )

## V. Table 2. Fluorolactonization of aryl substituted substrates

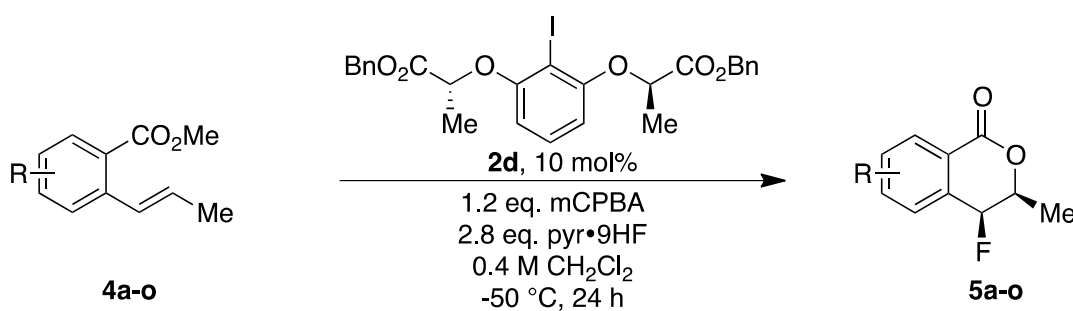

### General procedure for the synthesis of products **5a-o**.

To a 7 mL low-density polyethylene vial with snap cap charged with a Teflon PTFE coated stir bar was added mCPBA (77%, 269 mg, 1.2 mmol, 1.2 eq.). The reaction vial was cooled in a dry ice/acetone bath to  $<-60$  °C. To the cooled vial was added aryl iodide catalyst **2d** (56.0 mg, 0.10 mmol HF, 10 mol%) as a solution in  $\text{CH}_2\text{Cl}_2$  (1.5 mL) followed by pyr·9HF (70% HF, 0.65 mL, 25 mmol HF, 25 eq. HF). The alkene **4a-o** (1.0 mmol) was added as a solution in  $\text{CH}_2\text{Cl}_2$  (1.0 mL, 0.40 M total concentration). The tube was capped and transferred to a -50 °C cryocool with

vigorous stirring (vigorous stirring of the heterogeneous mixture is important to ensure reproducible conversion) at  $-50\text{ }^{\circ}\text{C}$  for 24 h. After this time, the crude reaction suspension was quenched by being added to a cooled ( $-78\text{ }^{\circ}\text{C}$ ) suspension of basic alumina (2.5 g) in  $\text{CH}_2\text{Cl}_2$  (5.0 mL). The resulting suspension was warmed to  $23\text{ }^{\circ}\text{C}$  and stirred at this temperature for 10 min. The suspension was filtered through a plug of basic alumina, eluting with  $\text{CH}_2\text{Cl}_2$ . The solution was concentrated under reduced pressure. The resulting residue was dry loaded onto celite and purified by column chromatography on silica gel (hexanes:EtOAc 100:0  $\rightarrow$  80:20) to afford fluorolactone **5a-o**.

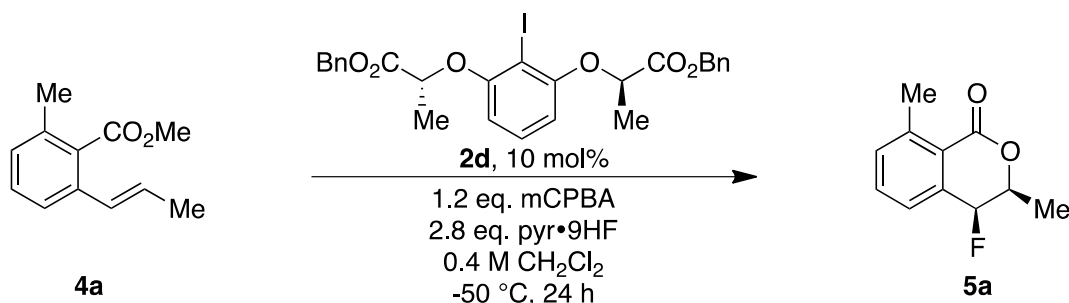

**4-fluoro-3,8-dimethylisochroman-1-one 5a.** Following the “general procedure for the synthesis of products 5a-o” on a 1 mmol scale, fluorolactone **5a** was isolated as a white solid (103 mg, 53% yield).

TLC (hexanes:EtOAc 1:1)

$R_f = 0.35$ , stained by  $\text{KMnO}_4$

$^1\text{H-NMR}$  (500 MHz,  $\text{CDCl}_3$ )

$\delta$  7.53 (t,  $J = 7.5$  Hz, 1H), 7.43 (d,  $J = 7.5$  Hz, 1H), 7.34 (d,  $J = 7.0$  Hz, 1H), 5.29 (d,  $J = 50.0$  Hz, 1H), 4.65 (dq,  $J = 27.0, 6.5$  Hz, 1H), 2.73 (s, 3H), 1.61 (d,  $J = 7.0$  Hz, 3H).

$^{13}\text{C-NMR}$  (125 MHz,  $\text{CDCl}_3$ )

$\delta$  163.2, 143.4 (d,  $J = 2.5$  Hz), 135.8 (d,  $J = 16.5$  Hz), 134.6 (d,  $J = 3.5$  Hz), 133.2 (d,  $J = 3.0$  Hz), 126.7 (d,  $J = 3.5$  Hz), 122.9 (d,  $J = 2.5$  Hz), 86.5 (d,  $J = 179.5$  Hz), 74.9 (d,  $J = 20.5$  Hz), 22.2, 16.1 (d,  $J = 4.0$  Hz).

$^{19}\text{F-NMR}$  (470 MHz,  $\text{CDCl}_3$ )

$\delta$  -184.6 (dd,  $J = 50.0, 27.0$  Hz).

HRMS (ESI+)

Calculated for  $\text{C}_{11}\text{H}_{11}\text{FO}_2$  ( $\text{M}+\text{H}$ ) $^+$ : 195.0816

Found: 195.0823

IR (thin film,  $\text{cm}^{-1}$ )

2989, 2941, 1716, 1255, 1241, 1217, 1117, 1070, 964, 937, 899, 811, 788, 703

$[\alpha]_D^{23} +123.6$  (*c* 1.0, CHCl<sub>3</sub>)

96% *ee*, Chiral GC (β-Cyclosil, 60 °C to 180 °C, 10 psi); *t<sub>R</sub>*(minor) = 47.7 min, *t<sub>R</sub>*(major) = 49.2 min.

Racemic sample:

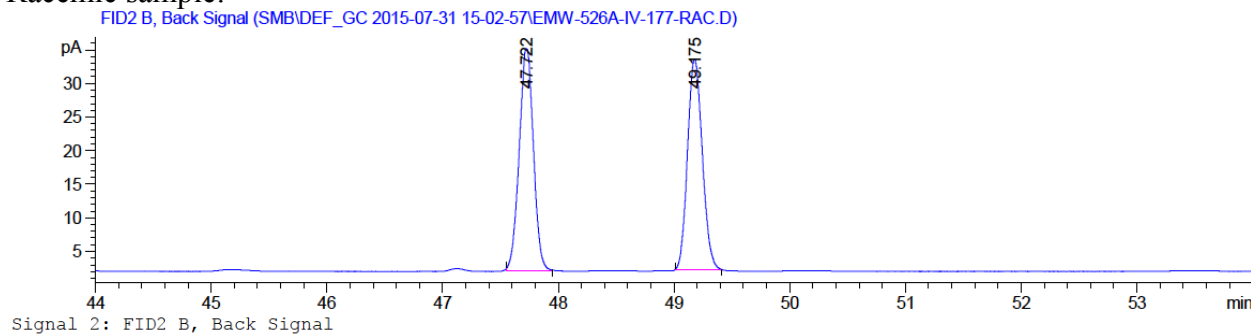

Enriched sample:

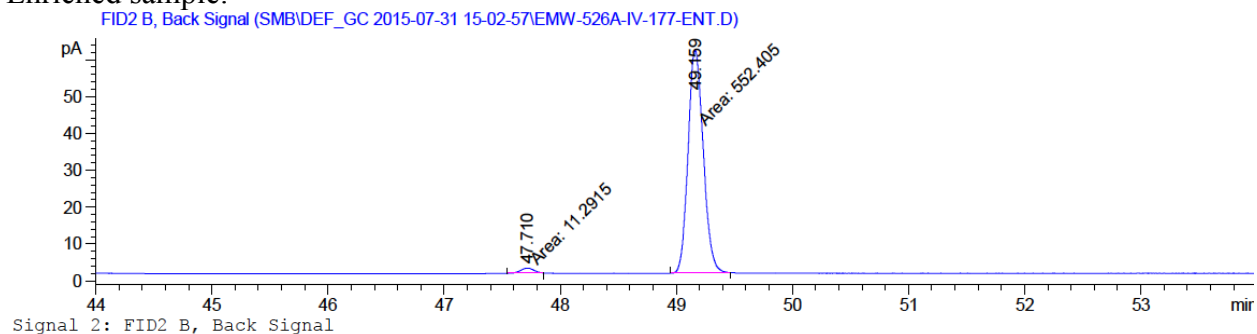

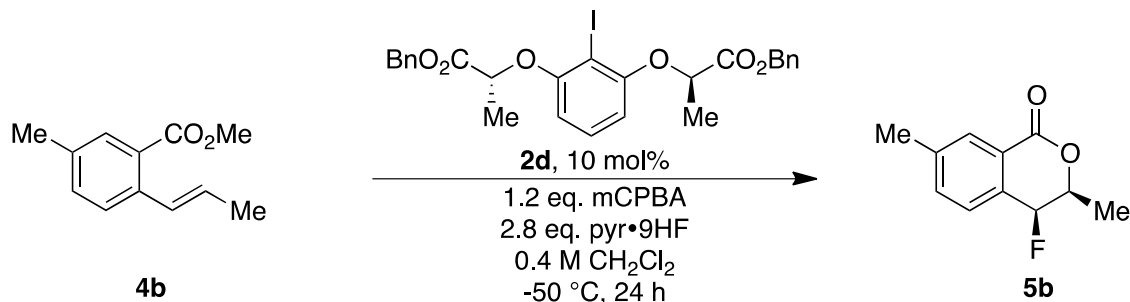

**4-fluoro-3,7-dimethylisochroman-1-one 5b.** Following the “general procedure for the synthesis of products 5a-o” on a 1 mmol scale, fluorolactone **5b** was isolated as a white solid (97 mg, 50% yield).

TLC (hexanes:EtOAc 3:1)

$R_f = 0.36$ , stained by KMnO<sub>4</sub>

<sup>1</sup>H-NMR (500 MHz, CDCl<sub>3</sub>)

$\delta$  8.00 (s, 1H), 7.49 (d,  $J = 7.0$  Hz, 1H), 7.41 (dd,  $J = 7.0, 3.0$  Hz, 1H), 5.29 (dd,  $J = 50.0, 1.5$  Hz, 1H), 4.69 (dq,  $J = 28.0, 6.5, 1.5$  Hz, 1H), 2.45 (d,  $J = 3.0$  Hz, 3H), 1.63 (d,  $J = 7.0$  Hz, 3H).

<sup>13</sup>C-NMR (125 MHz, CDCl<sub>3</sub>)

$\delta$  164.1, 141.7 (d,  $J = 3.5$  Hz), 135.0 (d,  $J = 3.0$  Hz), 131.9 (d,  $J = 17.5$  Hz), 130.7 (d,  $J = 2.5$  Hz), 128.8 (d,  $J = 3.5$  Hz), 124.5 (d,  $J = 2.5$  Hz), 85.3 (d,  $J = 180.5$  Hz), 75.8 (d,  $J = 23.0$  Hz), 21.3, 16.2 (d,  $J = 5.0$  Hz).

<sup>19</sup>F-NMR (470 MHz, CDCl<sub>3</sub>)

$\delta$  -182.0 (dd,  $J = 50.0, 28.0$  Hz).

HRMS (ESI+)

Calculated for C<sub>11</sub>H<sub>11</sub>FO<sub>2</sub> (M+H)<sup>+</sup>: 195.0816

Found: 195.0824

IR (thin film, cm<sup>-1</sup>)

2988, 2941, 1720, 1280, 1238, 1208, 1193, 1153, 1139, 1090, 1037, 946, 891, 843, 787, 589

$[\alpha]_D^{23} +67.4$  ( $c$  1.0, CHCl<sub>3</sub>)

93% *ee*, Chiral GC ( $\beta$ -Cyclosil, 60 °C to 180 °C, 10 psi);  $t_R$ (major) = 52.0 min,  $t_R$ (minor) = 52.3 min.

Racemic sample:

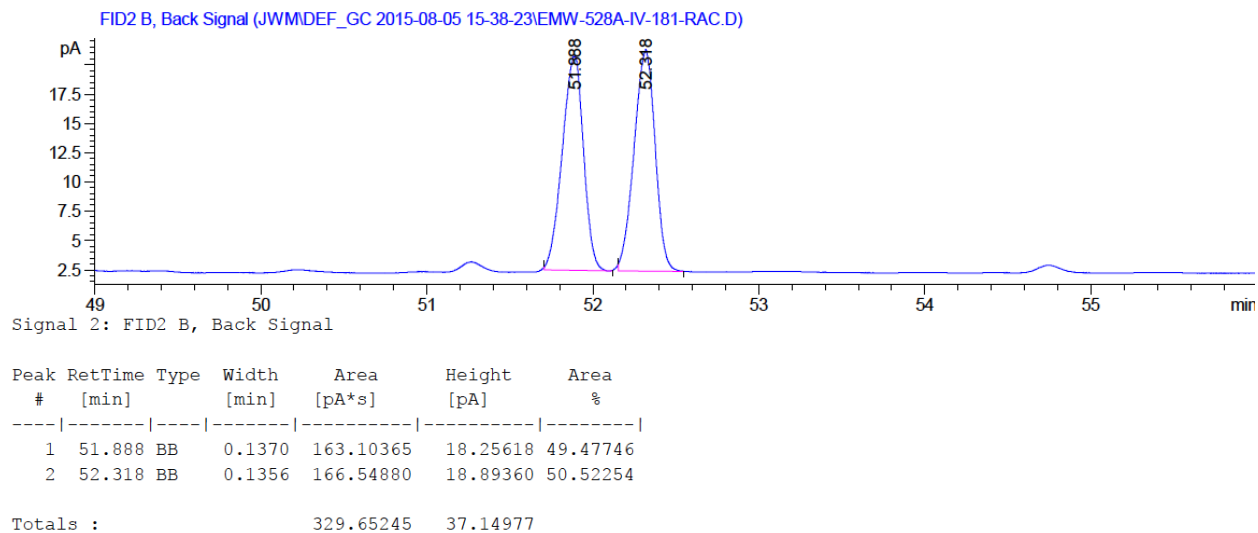

Enriched sample:

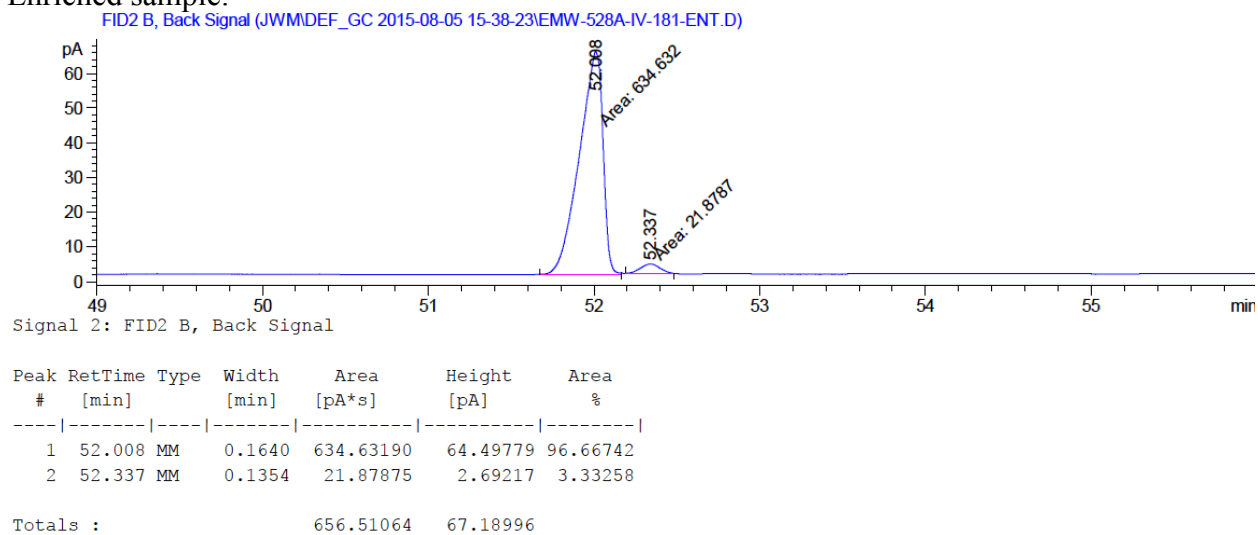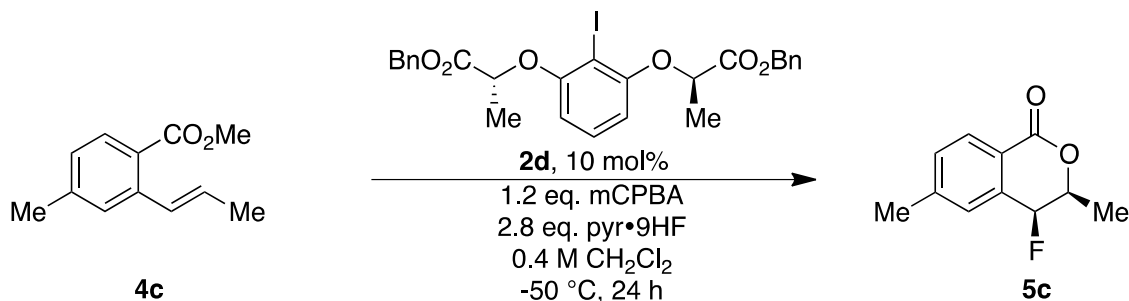

**4-fluoro-3,6-dimethylisochroman-1-one 5c.** Following the “general procedure for the synthesis of products 5a-o” on a 1 mmol scale, fluorolactone **5c** was isolated as a white solid (124 mg, 64% yield).

TLC (hexanes:EtOAc 3:1)

$R_f = 0.29$ , stained by  $\text{KMnO}_4$

<sup>1</sup>H-NMR (500 MHz, CDCl<sub>3</sub>)

δ 8.05 (d, *J* = 8.0 Hz, 1H), 7.41 (d, *J* = 8.0 Hz, 1H), 7.31 (s, 1H), 5.26 (dd, *J* = 50.0, 1.5 Hz, 1H), 4.69 (dq, *J* = 27.5, 6.5, 1.5 Hz, 1H), 2.46 (s, 3H), 1.62 (d, *J* = 6.5 Hz, 3H).

<sup>13</sup>C-NMR (125 MHz, CDCl<sub>3</sub>)

δ 164.1, 145.5 (d, *J* = 3.0 Hz), 134.6 (d, *J* = 17.0 Hz), 132.0 (d, *J* = 3.5 Hz), 130.4 (d, *J* = 2.5 Hz), 129.3 (d, *J* = 3.0 Hz), 122.0 (d, *J* = 2.5 Hz), 85.5 (d, *J* = 181.5 Hz), 75.7 (d, *J* = 22.5 Hz), 21.7, 16.1 (d, *J* = 5.0 Hz).

<sup>19</sup>F-NMR (470 MHz, CDCl<sub>3</sub>)

δ -183.1 (dd, *J* = 49.5, 28.0 Hz).

HRMS (ESI+)

Calculated for C<sub>11</sub>H<sub>11</sub>FO<sub>2</sub> (M+H)<sup>+</sup>: 195.0816

Found: 195.0825

IR (thin film, cm<sup>-1</sup>)

2986, 2943, 1729, 1615, 1274, 1237, 1135, 1094, 1037, 944, 927, 907, 892, 881, 852, 780, 729, 709, 697, 639

[α]<sub>D</sub><sup>23</sup> +56.0 (*c* 1.0, CHCl<sub>3</sub>)

94% *ee*, Chiral GC (β-Cyclosil, 60 °C to 180 °C, 10 psi); t<sub>R</sub>(major) = 54.6 min, t<sub>R</sub>(minor) = 55.8 min.

Racemic sample:

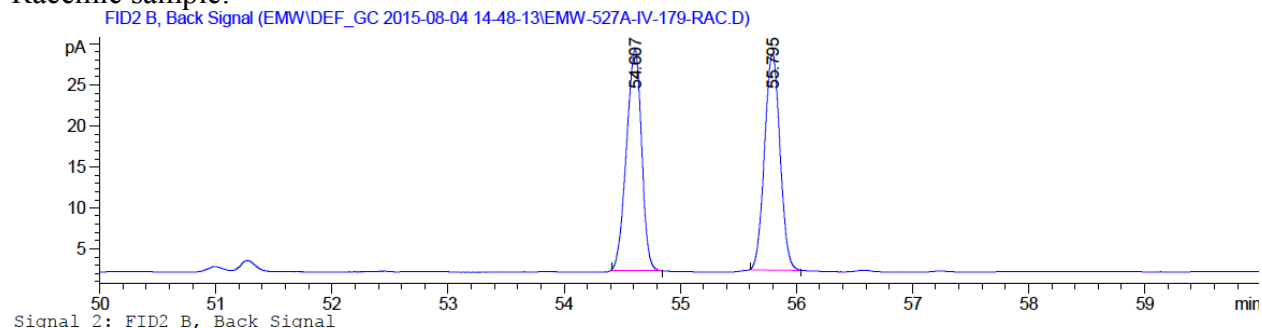

| Peak # | RetTime [min] | Type | Width [min] | Area [pA*s] | Height [pA] | Area %   |
|--------|---------------|------|-------------|-------------|-------------|----------|
| 1      | 54.607        | BB   | 0.1133      | 245.88181   | 27.04622    | 50.14268 |
| 2      | 55.795        | BB   | 0.1247      | 244.48247   | 26.24483    | 49.85732 |

Totals : 490.36427 53.29106



Calculated for  $C_{11}H_{11}FO_2$  (M+H)<sup>+</sup>: 195.0816  
 Found: 195.0820

IR (thin film,  $cm^{-1}$ )

2991, 2942, 1717, 1275, 1172, 1160, 1137, 1080, 1038, 985, 949, 763

$[\alpha]_D^{23} +48.4$  (*c* 1.0,  $CHCl_3$ )

66% *ee*, Chiral GC ( $\beta$ -Cyclosil, 60 °C to 180 °C, 10 psi);  $t_R$ (major) = 56.0 min,  $t_R$ (minor) = 56.5 min.

Racemic sample:

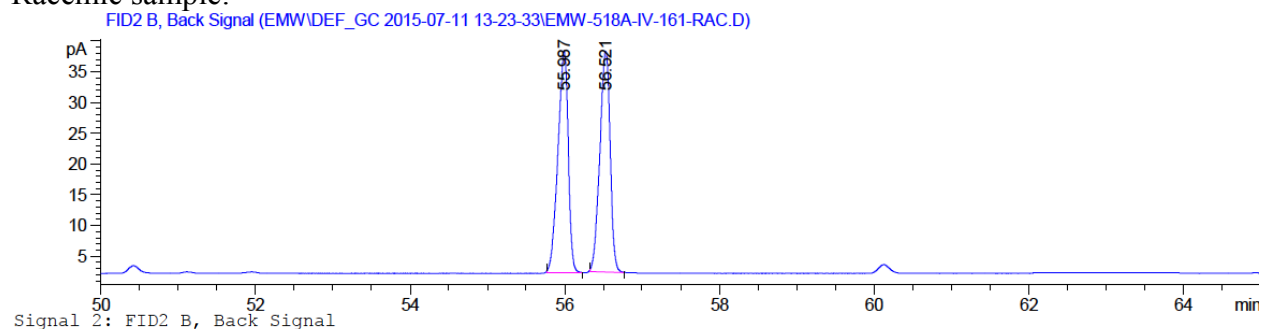

Enriched sample:

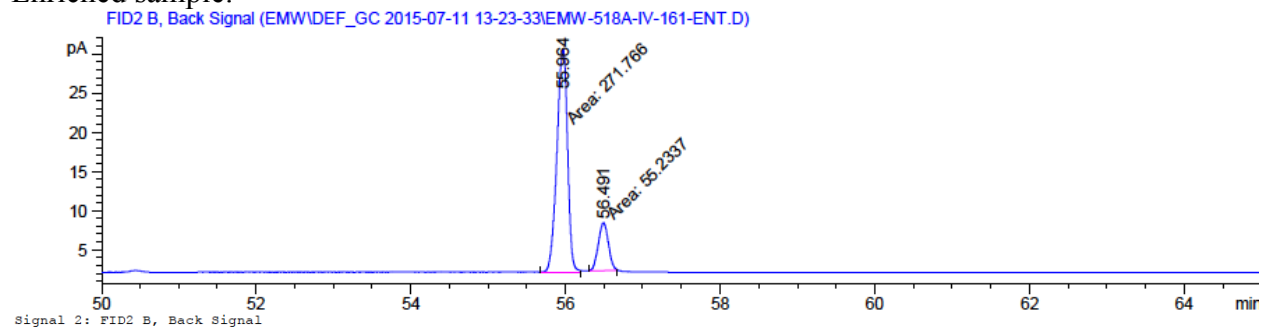



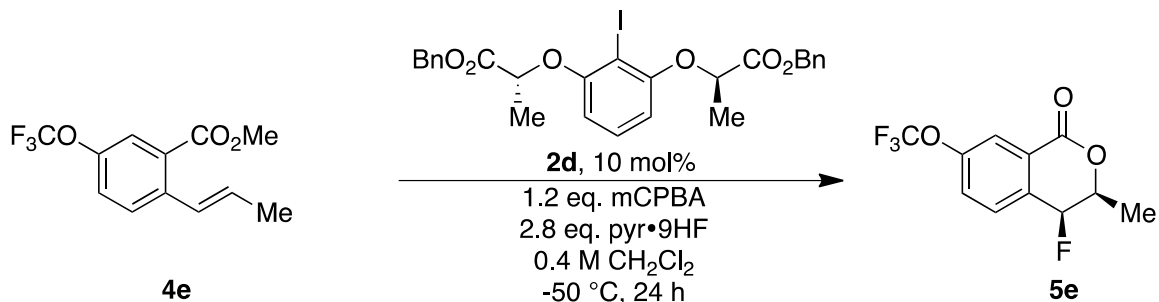

**4-fluoro-3-methyl-7-(trifluoromethoxy)isochroman-1-one 5e**. Following the “general procedure for the synthesis of products 5a-o” on a 1 mmol scale, fluorolactone **5e** was isolated as a white solid (145 mg, 55% yield).

TLC (hexanes:EtOAc 3:1)

$R_f$  = 0.26, stained by KMnO<sub>4</sub>

<sup>1</sup>H-NMR (500 MHz, CDCl<sub>3</sub>)

$\delta$  8.02 (s, 1H), 7.62 (d,  $J$  = 8.5 Hz, 1H), 7.53 (d,  $J$  = 8.5 Hz, 1H), 5.35 (d,  $J$  = 49.5 Hz, 1H), 4.74 (dq,  $J$  = 27.5, 6.5 Hz, 1H), 1.65 (d,  $J$  = 6.5 Hz, 3H).

<sup>13</sup>C-NMR (125 MHz, CDCl<sub>3</sub>)

$\delta$  162.5, 151.6 (app sextet,  $J$  = 2.0 Hz), 133.0 (d,  $J$  = 17.5 Hz), 130.9 (d,  $J$  = 3.0 Hz), 126.8 (d,  $J$  = 2.0 Hz), 126.5, 122.1, 120.3 (q,  $J$  = 258.0 Hz), 84.4 (d,  $J$  = 182.0 Hz), 76.0 (dd,  $J$  = 22.0, 3.0 Hz), 16.0 (d,  $J$  = 5.0 Hz).

<sup>19</sup>F-NMR (470 MHz, CDCl<sub>3</sub>)

$\delta$  -58.0, -183.1 (dd,  $J$  = 49.0, 27.0 Hz).

HRMS (ESI+)

Calculated for C<sub>11</sub>H<sub>8</sub>F<sub>4</sub>O<sub>3</sub> (M+H)<sup>+</sup>: 265.0482

Found: 265.0476

IR (thin film, cm<sup>-1</sup>)

2996, 2945, 1725, 1252, 1204, 1164, 1132, 1106, 1085, 1038, 990, 961, 931, 897, 880, 836, 786, 587

$[\alpha]_D^{23}$  +62.6 ( $c$  1.0, CHCl<sub>3</sub>)

89% *ee*, Chiral GC ( $\beta$ -Cyclosil, 60 °C to 180 °C, 10 psi);  $t_R$ (major) = 39.8 min,  $t_R$ (minor) = 40.6 min.

Racemic sample:

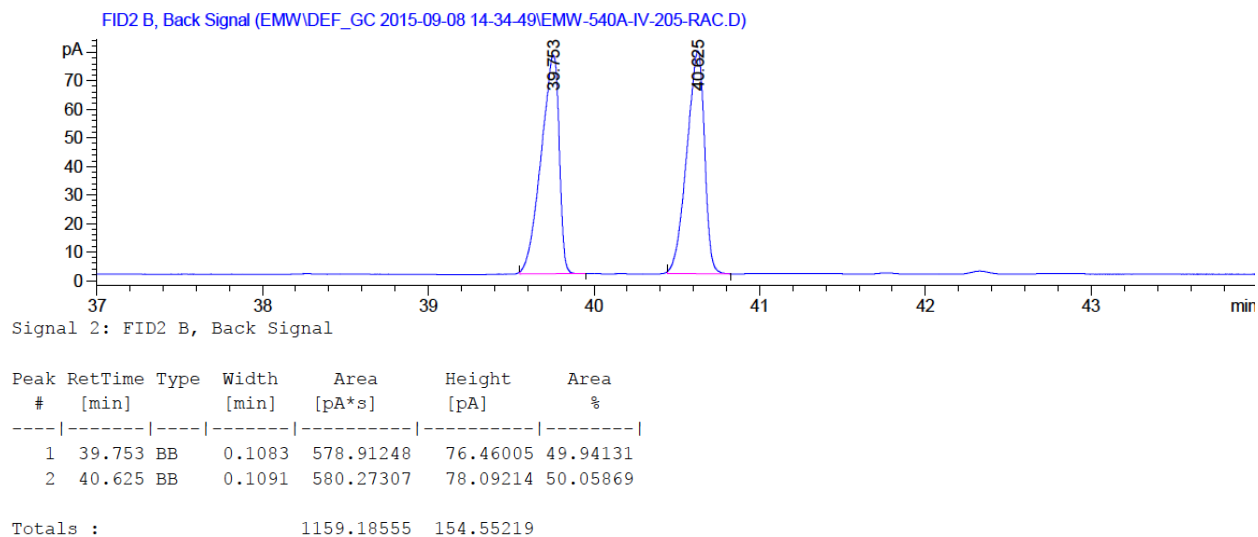

Enriched sample:

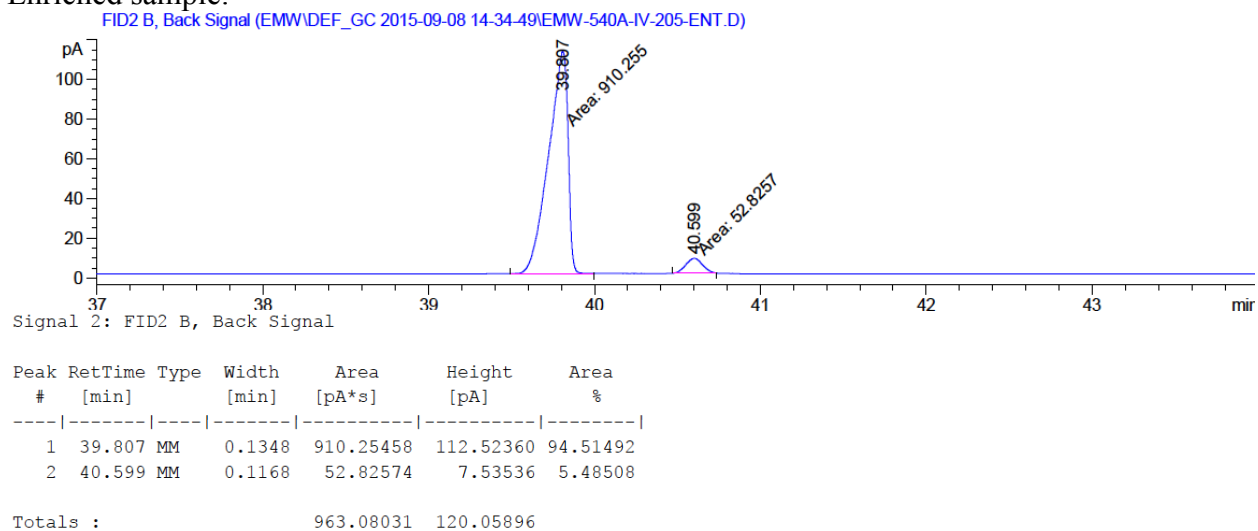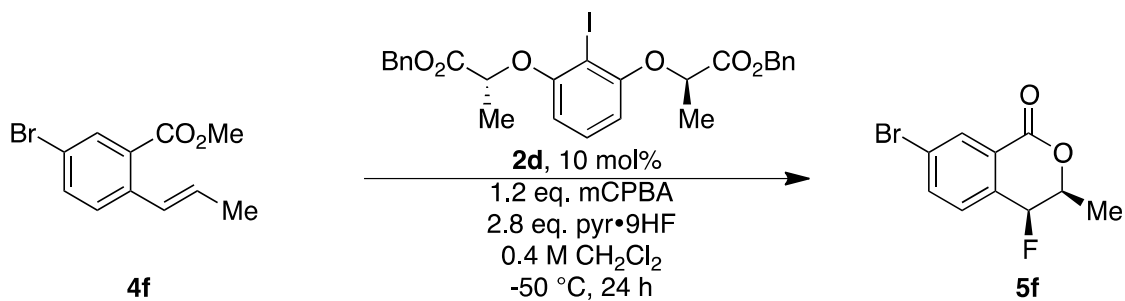

**7-bromo-4-fluoro-3-methylisochroman-1-one 5f.** Following the “general procedure for the synthesis of products 5a-o” on a 1 mmol scale, fluorolactone **5f** was isolated as a white solid (124 mg, 48% yield).

TLC (hexanes:EtOAc 3:1)

$R_f = 0.34$ , stained by  $\text{KMnO}_4$

<sup>1</sup>H-NMR (500 MHz, CDCl<sub>3</sub>)

δ 8.33 (bs, 1H), 7.84-7.81 (m, 1H), 7.42 (dd, *J* = 8.0, 2.5 Hz, 1H), 5.32 (dd, *J* = 49.5, 1.5 Hz, 1H), 4.72 (dq, *J* = 28.0, 7.0, 1.5 Hz, 1H), 1.65 (dd, *J* = 6.5, 1.0 Hz, 3H).

<sup>13</sup>C-NMR (125 MHz, CDCl<sub>3</sub>)

δ 162.5, 137.3 (d, *J* = 3.0 Hz), 133.4 (d, *J* = 3.0 Hz), 133.3 (d, *J* = 17.5 Hz), 130.4 (d, *J* = 3.0 Hz), 126.3 (d, *J* = 2.0 Hz), 122.5 (d, *J* = 4.5 Hz), 84.7 (d, *J* = 182.0), 75.8 (d, *J* = 22.0 Hz), 16.0 (d, *J* = 4.5 Hz).

<sup>19</sup>F-NMR (470 MHz, CDCl<sub>3</sub>)

δ -183.4 (dd, *J* = 49.5, 27.5 Hz).

HRMS (ESI+)

Calculated for C<sub>10</sub>H<sub>8</sub>BrFO<sub>2</sub> (M+H)<sup>+</sup>: 258.9764

Found: 258.9759

IR (thin film, cm<sup>-1</sup>)

3084, 2990, 2942, 1723, 1418, 1283, 1254, 1228, 1136, 1099, 1072, 1036, 983, 942, 896, 875, 830, 788, 704, 583, 526

[α]<sub>D</sub><sup>23</sup> +55.0 (*c* 1.0, CHCl<sub>3</sub>)

86% *ee*, Chiral GC (β-Cyclosil, 60 °C to 180 °C, 10 psi); t<sub>R</sub>(major) = 67.5 min, t<sub>R</sub>(minor) = 68.6 min.

Racemic sample:

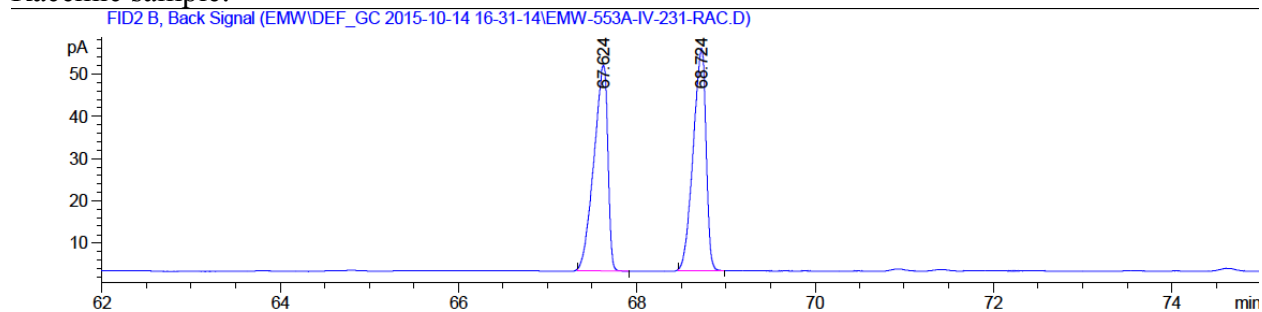

Signal 2: FID2 B, Back Signal

| Peak # | RetTime [min] | Type | Width [min] | Area [pA*s] | Height [pA] | Area %   |
|--------|---------------|------|-------------|-------------|-------------|----------|
| 1      | 67.624        | BB   | 0.1302      | 525.79370   | 48.59820    | 49.91754 |
| 2      | 68.724        | BB   | 0.1222      | 527.53082   | 52.43005    | 50.08246 |

Totals : 1053.32452 101.02824

Enriched sample:

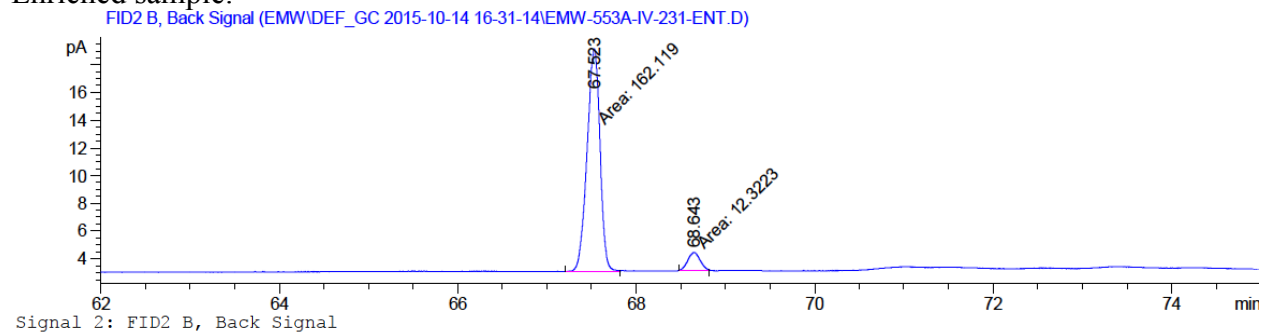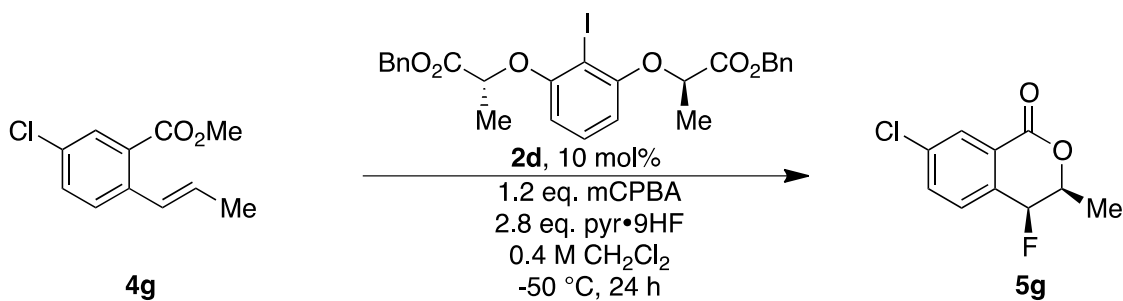

**7-chloro-4-fluoro-3-methylisochroman-1-one 5g.** Following the “general procedure for the synthesis of products 5a-o” on a 1 mmol scale, fluorolactone **5g** was isolated as a white solid (128 mg, 60% yield).

TLC (hexanes:EtOAc 3:1)

$R_f = 0.26$ , stained by KMnO<sub>4</sub>

<sup>1</sup>H-NMR (500 MHz, CDCl<sub>3</sub>)

$\delta$  8.15 (d,  $J = 2.0$  Hz, 1H), 7.66 (dq,  $J = 8.5, 1.5$  Hz, 1H), 7.49 (dd,  $J = 8.5, 2.5$  Hz, 1H), 5.32 (dd,  $J = 49.5, 1.5$  Hz, 1H), 4.72 (dq,  $J = 27.5, 6.5, 1.5$  Hz, 1H), 1.64 (dd,  $J = 6.5, 1.0$  Hz, 3H).

<sup>13</sup>C-NMR (125 MHz, CDCl<sub>3</sub>)

$\delta$  162.6, 137.6 (d,  $J = 4.5$  Hz), 134.4 (d,  $J = 3.0$  Hz), 132.9 (d,  $J = 18.5$  Hz), 130.3 (d,  $J = 2.5$  Hz), 130.3 (d,  $J = 3.5$  Hz), 126.3 (d,  $J = 2.0$  Hz), 84.6 (d,  $J = 182.5$  Hz), 75.9 (d,  $J = 22.0$  Hz), 16.0 (d,  $J = 5.0$  Hz).

<sup>19</sup>F-NMR (470 MHz, CDCl<sub>3</sub>)

$\delta$  -183.2 (dd,  $J$  = 49.5, 27.5 Hz).

HRMS (ESI+)

Calculated for  $C_{10}H_8ClFO_2$  (M+H)<sup>+</sup>: 215.0270

Found: 215.0278

IR (thin film,  $cm^{-1}$ )

2999, 2943, 1729, 1285, 1256, 1227, 1134, 1077, 939, 907, 895, 878, 826, 782, 729, 705, 665, 584, 529

$[\alpha]_D^{23}$  +69.0 ( $c$  1.0,  $CHCl_3$ )

86% *ee*, Chiral GC ( $\beta$ -Cyclosil, 60 °C to 180 °C, 10 psi);  $t_R$ (major) = 58.1 min,  $t_R$ (minor) = 59.2 min.

Racemic sample:

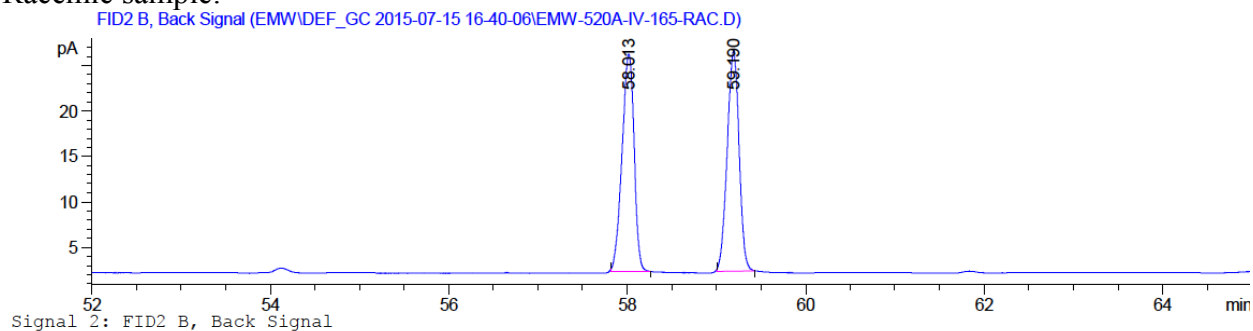

Enriched sample:

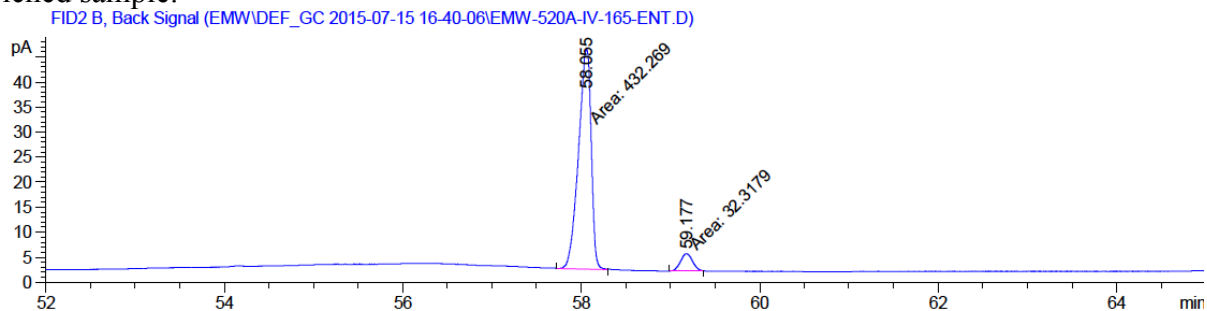

Signal 2: FID2 B, Back Signal

| Peak #   | RetTime [min] | Type | Width [min] | Area [pA*s] | Height [pA] | Area %   |
|----------|---------------|------|-------------|-------------|-------------|----------|
| 1        | 58.055        | MM   | 0.1635      | 432.26938   | 44.06221    | 93.04374 |
| 2        | 59.177        | MM   | 0.1543      | 32.31788    | 3.49147     | 6.95626  |
| Totals : |               |      |             | 464.58726   | 47.55368    |          |

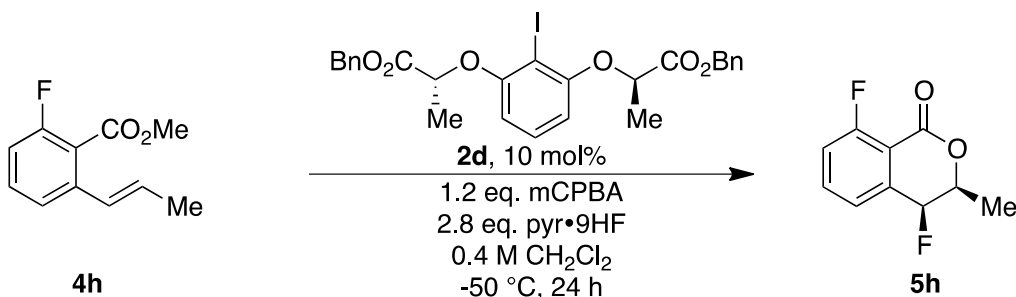

**4,8-difluoro-3-methylisochroman-1-one 5h.** Following the “general procedure for the synthesis of products 5a-o” on a 1 mmol scale, fluorolactone **5h** was isolated as a white solid (133 mg, 67% yield).

TLC (hexanes:EtOAc 4:1)

$R_f$  = 0.10, stained by KMnO<sub>4</sub>

<sup>1</sup>H-NMR (500 MHz, CDCl<sub>3</sub>)

$\delta$  7.72-7.64 (m, 1H), 7.38-7.27 (m, 2H), 5.34 (dt,  $J$  = 49.5, 2.0 Hz, 1H), 4.70 (dq,  $J$  = 27.5, 7.0, 1.5 Hz, 1H), 1.62 (dd,  $J$  = 6.5, 1.0 Hz, 3H).

<sup>13</sup>C-NMR (125 MHz, CDCl<sub>3</sub>)

$\delta$  163.7, 160.5 (d,  $J$  = 270.0, 7.0 Hz), 136.9 (d,  $J$  = 17.0 Hz), 135.9 (dd,  $J$  = 10.0, 3.0 Hz), 124.6 (t,  $J$  = 4.0 Hz), 119.8 (dd,  $J$  = 21.5, 3.5 Hz), 113.0 (d,  $J$  = 7.0 Hz), 85.1 (dd,  $J$  = 183.0, 2.5 Hz), 75.4 (d,  $J$  = 22.0 Hz), 15.9 (d,  $J$  = 4.0 Hz).

<sup>19</sup>F-NMR (470 MHz, CDCl<sub>3</sub>)

$\delta$  -107.4, -185.1 (dd,  $J$  = 52.5, 26.5 Hz).

HRMS (ESI+)

Calculated for C<sub>10</sub>H<sub>8</sub>F<sub>2</sub>O<sub>2</sub> (M+H)<sup>+</sup>: 199.0565

Found: 199.0571

IR (thin film, cm<sup>-1</sup>)

2994, 2944, 1728, 1475, 1251, 1108, 1041, 978, 939, 896, 820, 798, 728, 696, 591

$[\alpha]_D^{23}$  +89.2 ( $c$  1.0, CHCl<sub>3</sub>)

83% *ee*, Chiral GC ( $\beta$ -Cyclosil, 60 °C to 180 °C, 10 psi);  $t_R$ (minor) = 53.4 min,  $t_R$ (major) = 53.9 min.

Racemic sample:

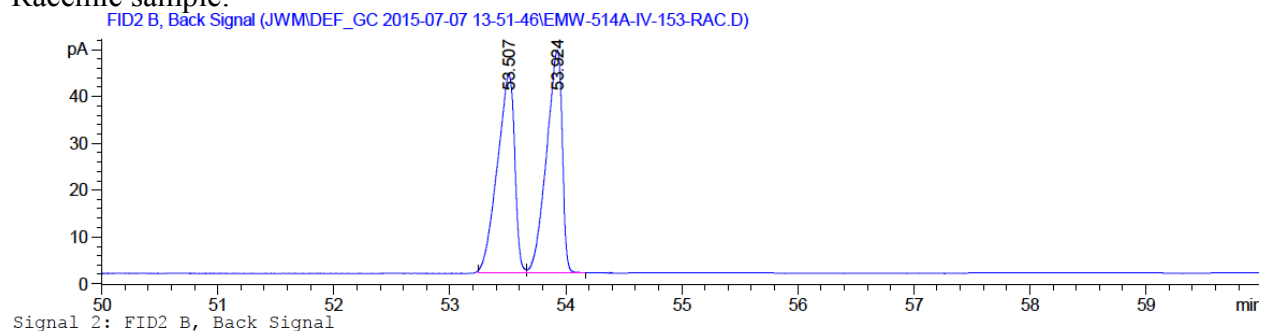

Enriched sample:

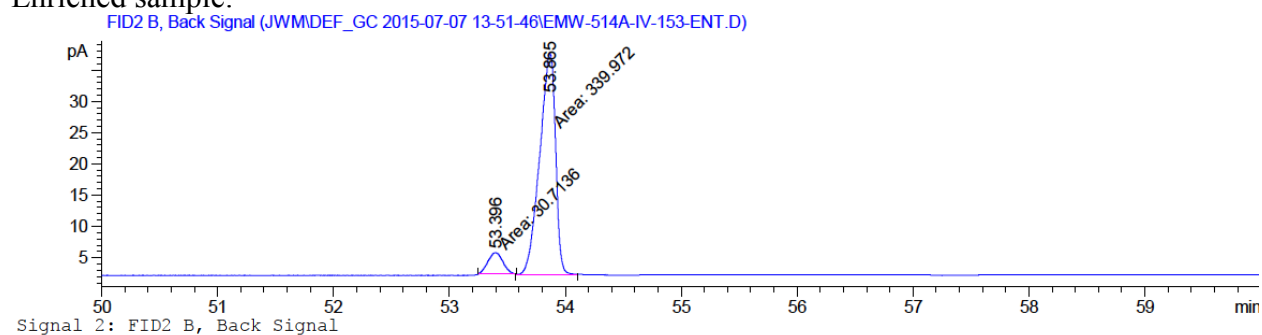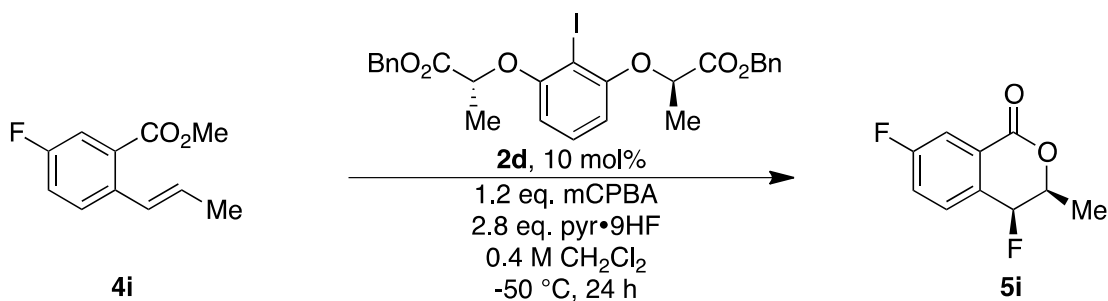

**4,7-difluoro-3-methylisochroman-1-one 5i.** Following the “general procedure for the synthesis of products 5a-o” on a 1 mmol scale, fluorolactone **5i** was isolated as a white solid (113 mg, 57% yield).

TLC (hexanes:EtOAc 3:1)

$R_f = 0.26$ , stained by  $\text{KMnO}_4$

$^1\text{H-NMR}$  (500 MHz,  $\text{CDCl}_3$ )

$\delta$  7.84 (dd,  $J = 8.5, 2.5$  Hz, 1H), 7.55 (ddd,  $J = 8.5, 5.0, 2.5$  Hz, 1H), 7.39 (ddd,  $J = 8.5, 2.5, 1.0$  Hz, 1H), 5.32 (dd,  $J = 49.5, 1.5$  Hz, 1H), 4.72 (dq,  $J = 28.0, 6.5, 1.5$  Hz, 1H), 1.64 (dd,  $J = 7.0, 1.0$  Hz, 3H).

$^{13}\text{C-NMR}$  (125 MHz,  $\text{CDCl}_3$ )

$\delta$  164.0 (dd,  $J = 252.5, 3.5$  Hz), 162.8 (dd,  $J = 2.5, 1.0$  Hz), 131.2 (dd,  $J = 7.5, 3.0$  Hz), 130.8 (dd,  $J = 18.0, 3.0$  Hz), 127.0 (dd,  $J = 8.5, 2.0$  Hz), 121.7 (dd,  $J = 22.5, 3.0$  Hz), 117.1 (dd,  $J = 23.5, 2.5$  Hz), 84.5 (dd,  $J = 182.0, 2.5$  Hz), 76.1 (dd,  $J = 22.5, 2.0$  Hz), 16.1 (d,  $J = 5.0$  Hz).

$^{19}\text{F-NMR}$  (470 MHz,  $\text{CDCl}_3$ )

$\delta$  -107.1 (m), -181.8 (ddd,  $J = 49.0, 28.0, 8.0$  Hz).

HRMS (ESI+)

Calculated for  $\text{C}_{10}\text{H}_8\text{F}_2\text{O}_2$  (M+H) $^+$ : 199.0565

Found: 199.0561

IR (thin film,  $\text{cm}^{-1}$ )

3075, 3006, 2949, 1721, 1505, 1439, 1296, 1275, 1236, 1217, 1129, 1076, 1033, 944, 901, 893, 850, 830, 787, 694, 591, 534

$[\alpha]_D^{23} +80.2$  ( $c$  1.0,  $\text{CHCl}_3$ )

93% *ee*, Chiral GC ( $\beta$ -Cyclosil, 60 °C to 180 °C, 10 psi);  $t_R$ (major) = 41.3 min,  $t_R$ (minor) = 42.4 min.

Racemic sample:

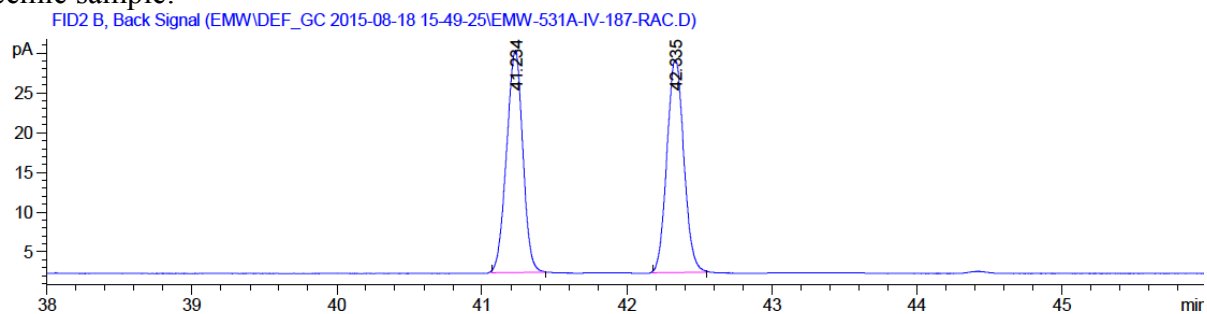



Signal 2: FID2 B, Back Signal

| Peak #   | RetTime [min] | Type | Width [min] | Area [pA*s] | Height [pA] | Area %   |
|----------|---------------|------|-------------|-------------|-------------|----------|
| 1        | 41.234        | BB   | 0.1085      | 217.18713   | 27.87222    | 50.00758 |
| 2        | 42.335        | BB   | 0.1140      | 217.12128   | 26.71702    | 49.99242 |
| Totals : |               |      |             | 434.30841   | 54.58924    |          |

Enriched sample:

FID2 B, Back Signal (EMW\DEF\_GC 2015-08-18 15-49-25\EMW-531A-IV-187-ENT.D)

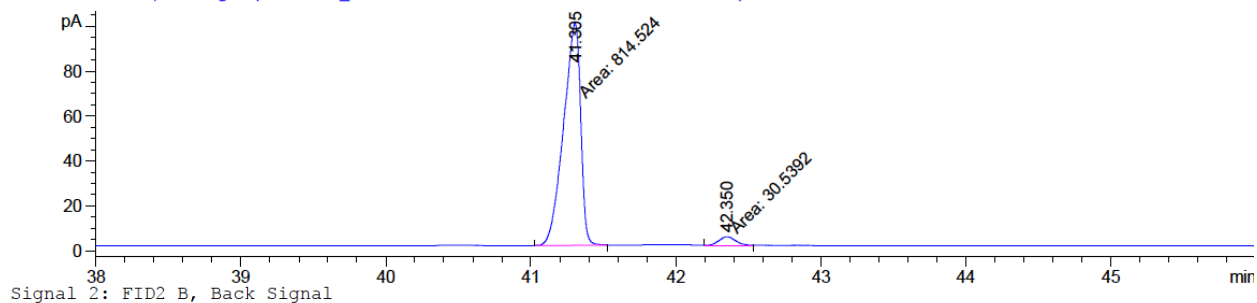

| Peak #   | RetTime [min] | Type | Width [min] | Area [pA*s] | Height [pA] | Area %   |
|----------|---------------|------|-------------|-------------|-------------|----------|
| 1        | 41.305        | MM   | 0.1365      | 814.52423   | 99.46216    | 96.38617 |
| 2        | 42.350        | MM   | 0.1337      | 30.53919    | 3.80829     | 3.61383  |
| Totals : |               |      |             | 845.06342   | 103.27045   |          |

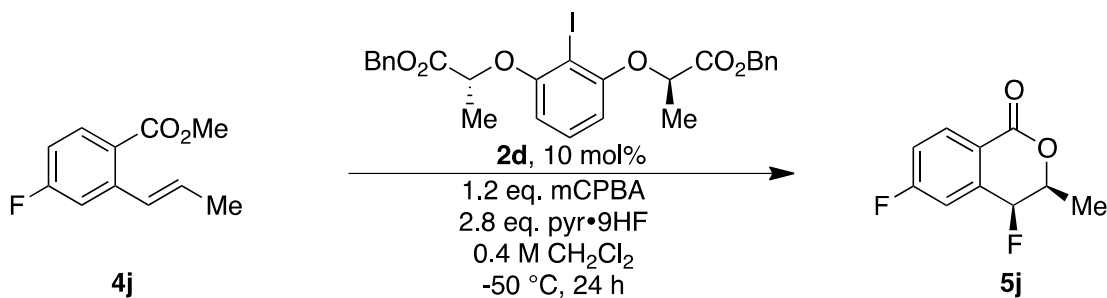

**4,6-difluoro-3-methylisochroman-1-one 5j.** Following the “general procedure for the synthesis of products 5a-o” on a 1 mmol scale, fluorolactone **5j** was isolated as a white solid (121 mg, 61% yield).

TLC (hexanes:EtOAc 3:1)

$R_f = 0.25$ , stained by KMnO<sub>4</sub>

<sup>1</sup>H-NMR (500 MHz, CDCl<sub>3</sub>)

δ 8.20 (dd,  $J = 8.5, 5.5$  Hz, 1H), 7.29 (tt,  $J = 8.5, 2.5$  Hz, 1H), 7.21 (dt,  $J = 8.0, 2.5$  Hz, 1H), 5.30 (dd,  $J = 49.5, 1.5$  Hz, 1H), 4.72 (dq,  $J = 27.5, 7.0, 1.5$  Hz, 1H), 1.61 (dd,  $J = 7.0, 1.0$  Hz, 3H).

<sup>13</sup>C-NMR (125 MHz, CDCl<sub>3</sub>)

$\delta$  165.9 (dd,  $J = 258.0, 3.5$  Hz), 162.8, 137.3 (dd,  $J = 17.0, 8.5$  Hz), 133.6 (dd,  $J = 9.5, 2.5$  Hz), 121.0 (t,  $J = 3.0$  Hz), 118.7 (dd,  $J = 22.5, 3.5$  Hz), 115.6 (dd,  $J = 23.0, 3.5$  Hz), 84.9 (d,  $J = 183.0$  Hz), 75.6 (d,  $J = 22.0$  Hz), 15.9 (d,  $J = 5.0$  Hz).

$^{19}\text{F}$ -NMR (470 MHz,  $\text{CDCl}_3$ )

$\delta$  -101.9 (m), -184.5 (dd,  $J = 49.5, 27.0$  Hz).

HRMS (ESI+)

Calculated for  $\text{C}_{10}\text{H}_8\text{F}_2\text{O}_2$  (M+H) $^+$ : 199.0565

Found: 199.0572

IR (thin film,  $\text{cm}^{-1}$ )

3081, 2991, 2950, 1741, 1613, 1361, 1298, 1267, 1254, 1119, 1100, 953, 871, 694

$[\alpha]_{\text{D}}^{23} +57.4$  ( $c$  1.0,  $\text{CHCl}_3$ )

80% *ee*, Chiral GC ( $\beta$ -Cyclosil, 60 °C to 180 °C, 10 psi);  $t_{\text{R}}$ (major) = 42.9 min,  $t_{\text{R}}$ (minor) = 43.7 min.

Racemic sample:

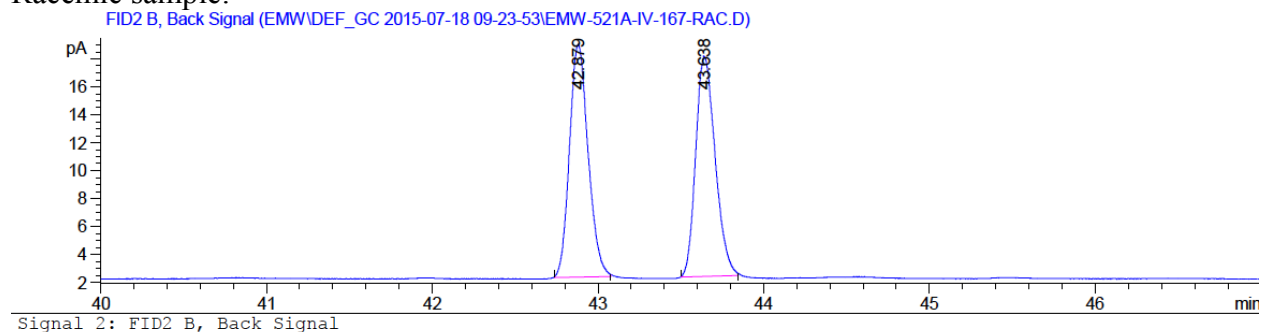

Enriched sample:



IR (thin film,  $\text{cm}^{-1}$ )

3069, 3000, 2950, 1724, 1477, 1363, 1274, 1251, 1171, 1158, 1134, 1107, 1034, 965, 922, 879, 852, 763

$[\alpha]_D^{23} +27.4$  (*c* 1.0,  $\text{CHCl}_3$ )

30% *ee*, Chiral GC ( $\beta$ -Cyclosil, 60 °C to 180 °C, 10 psi);  $t_R(\text{minor}) = 41.1$  min,  $t_R(\text{major}) = 41.5$  min.

Racemic sample:

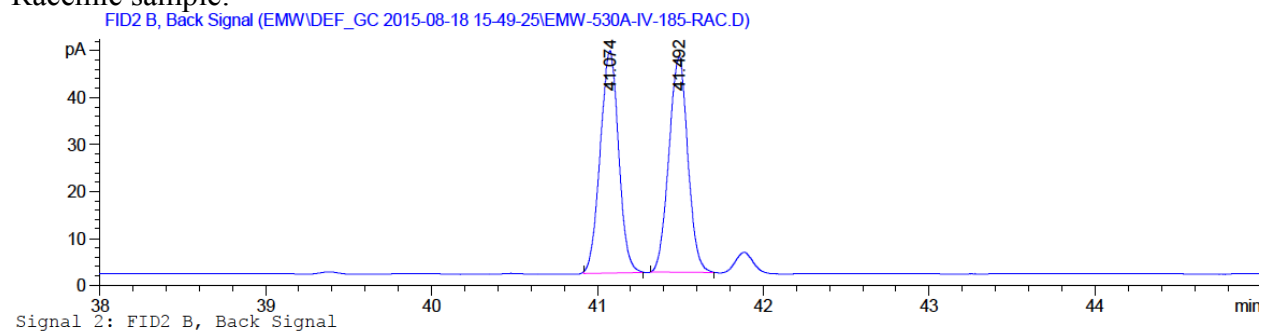

Enriched sample:

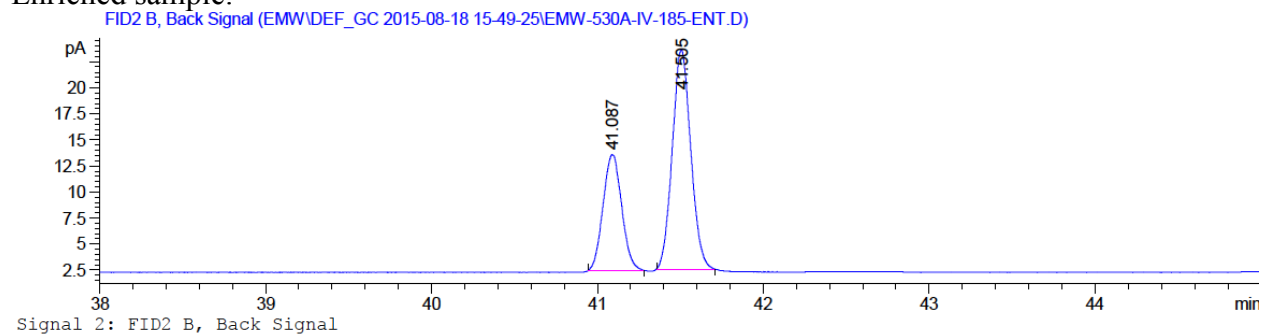

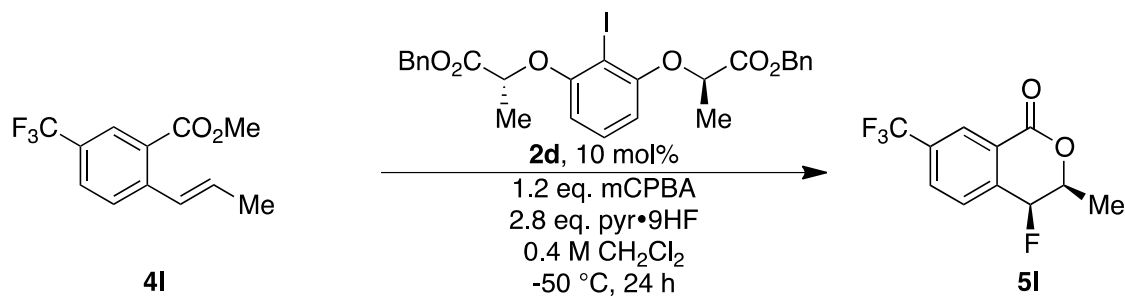

**4-fluoro-3-methyl-7-(trifluoromethyl)isochroman-1-one 5I.** Following the “general procedure for the synthesis of products 5a-o” on a 1 mmol scale, fluorolactone **5I** was isolated as a white solid (149 mg, 60% yield).

TLC (hexanes:EtOAc 2:1)

$R_f$  = 0.43, stained by  $\text{KMnO}_4$

$^1\text{H-NMR}$  (500 MHz,  $\text{CDCl}_3$ )

$\delta$  8.47 (s, 1H), 7.95 (d,  $J$  = 8.0 Hz, 1H), 7.69 (dd,  $J$  = 8.0, 1.5 Hz, 1H), 5.40 (dd,  $J$  = 49.0, 1.5 Hz, 1H), 4.76 (dq,  $J$  = 26.0, 6.5, 2.0 Hz, 1H), 1.66 (dd,  $J$  = 6.5, 1.0 Hz, 3H).

$^{13}\text{C-NMR}$  (125 MHz,  $\text{CDCl}_3$ )

$\delta$  162.4, 137.8 (d,  $J$  = 17.0 Hz), 133.7 (dd,  $J$  = 34.0, 3.5 Hz), 130.8 (m), 129.5 (d,  $J$  = 3.5 Hz), 127.6 (m), 125.6 (d,  $J$  = 2.5 Hz), 123.1 (d,  $J$  = 272.0 Hz), 84.4 (d,  $J$  = 183.0 Hz), 75.7 (d,  $J$  = 22.0 Hz), 15.9 (d,  $J$  = 4.5 Hz).

$^{19}\text{F-NMR}$  (470 MHz,  $\text{CDCl}_3$ )

$\delta$  -63.2 (d,  $J$  = 2.0 Hz), -185.1 (dd,  $J$  = 48.0, 26.5 Hz).

HRMS (ESI+)

Calculated for  $\text{C}_{11}\text{H}_8\text{F}_4\text{O}_2$  ( $\text{M}+\text{H}$ )<sup>+</sup>: 249.0533

Found: 249.0535

IR (thin film,  $\text{cm}^{-1}$ )

2994, 2917, 2849, 1729, 1331, 1251, 1234, 1172, 1126, 1098, 1069, 1039, 948, 885, 845, 634

$[\alpha]_D^{23}$  +39.4 ( $c$  1.0,  $\text{CHCl}_3$ )

73% *ee*, Chiral GC ( $\beta$ -Cyclosil, 60 °C to 180 °C, 10 psi);  $t_R$ (major) = 40.2 min,  $t_R$ (minor) = 41.1 min.

Racemic sample:

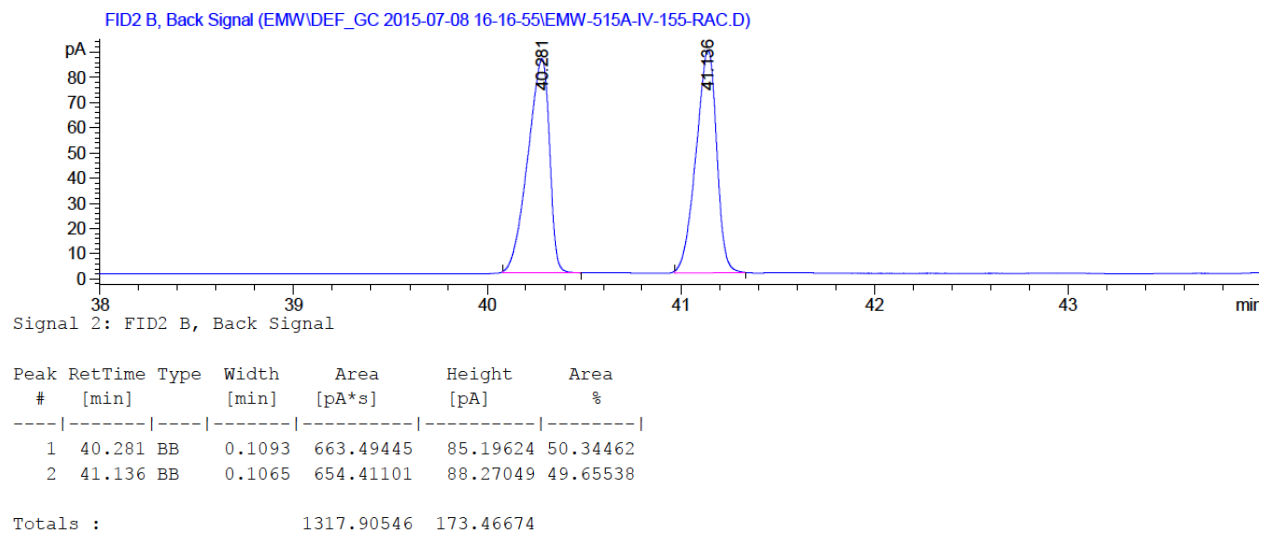

Enriched sample:

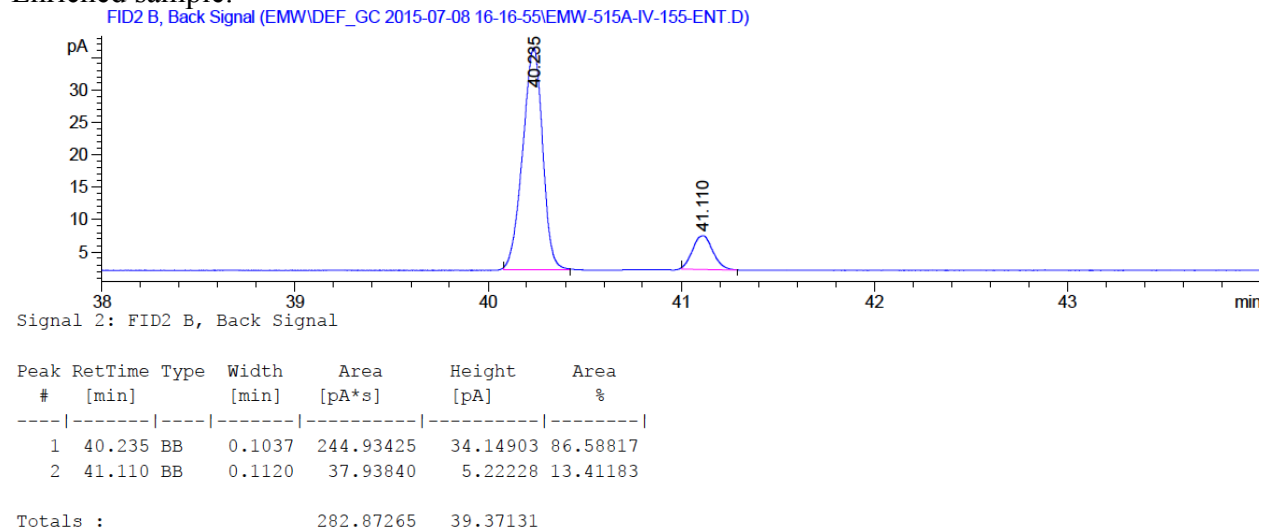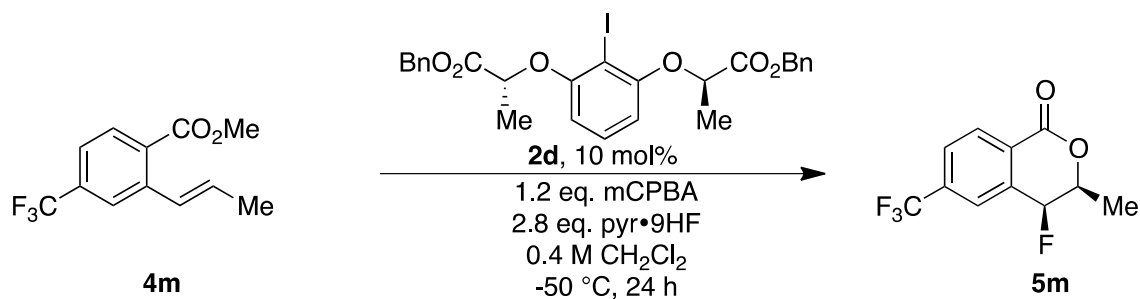

**4-fluoro-3-methyl-6-(trifluoromethyl)isochroman-1-one 5m.** Following the “general procedure for the synthesis of products 5a-o” on a 1 mmol scale, fluorolactone **5m** was isolated as a white solid (109 mg, 44% yield).

TLC (hexanes:EtOAc 3:1)

$R_f = 0.41$ , stained by  $\text{KMnO}_4$

$^1\text{H-NMR}$  (500 MHz,  $\text{CDCl}_3$ )

$\delta$  8.33 (d,  $J = 8.0$  Hz, 1H), 7.89 (d,  $J = 8.0$  Hz, 1H), 7.81 (s, 1H), 5.41 (dd,  $J = 49.0, 1.5$  Hz, 1H), 4.77 (dq,  $J = 27.5, 7.0, 2.0$  Hz, 1H), 1.67 (dd,  $J = 7.0, 1.5$  Hz, 3H).

$^{13}\text{C-NMR}$  (125 MHz,  $\text{CDCl}_3$ )

$\delta$  162.4, 135.8 (dq,  $J = 33.0, 3.0$ ), 135.3 (d,  $J = 18.0$  Hz), 131.2 (d,  $J = 2.0$  Hz), 127.8, 127.0 (dp,  $J = 274.0, 3.5$  Hz), 124.1, 121.9, 84.7 (d,  $J = 183.0$  Hz), 75.8 (dd,  $J = 22.0, 2.5$  Hz), 15.9 (d,  $J = 5.0$  Hz).

$^{19}\text{F-NMR}$  (470 MHz,  $\text{CDCl}_3$ )

$\delta$  -63.3, -184.2 (dd,  $J = 48.5, 26.5$  Hz).

HRMS (ESI+)

Calculated for  $\text{C}_{11}\text{H}_8\text{F}_4\text{O}_2$  (M+H) $^+$ : 249.0533

Found: 249.0537

IR (thin film,  $\text{cm}^{-1}$ )

3100, 2994, 1737, 1337, 1322, 1297, 1268, 1197, 1185, 1154, 1129, 1097, 1067, 982, 941, 905, 883, 868, 798, 700

$[\alpha]_D^{23} +50.8$  ( $c$  1.0,  $\text{CHCl}_3$ )

76% *ee*, Chiral GC ( $\beta$ -Cyclosil, 60 °C to 180 °C, 10 psi);  $t_R$ (major) = 40.3 min,  $t_R$ (minor) = 42.1 min.

Racemic sample:

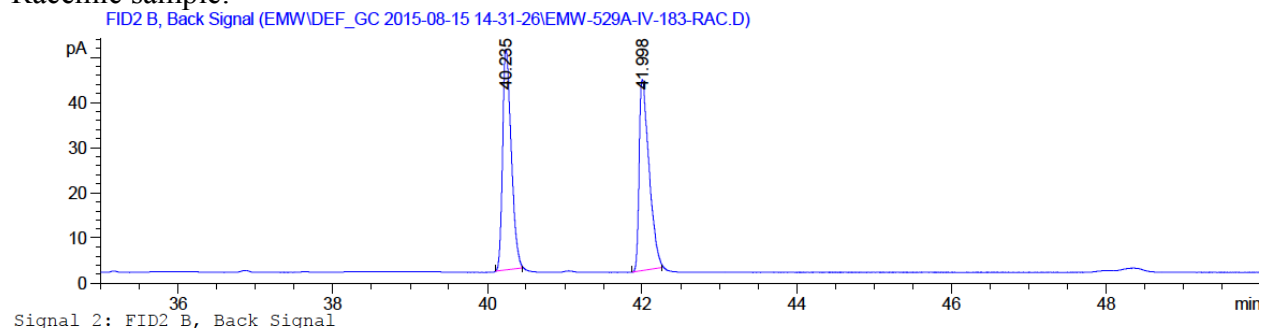

| Peak # | RetTime [min] | Type | Width [min] | Area [pA*s] | Height [pA] | Area %   |
|--------|---------------|------|-------------|-------------|-------------|----------|
| 1      | 40.235        | BB   | 0.1093      | 380.51321   | 48.81329    | 50.21573 |
| 2      | 41.998        | BB   | 0.1255      | 377.24377   | 42.36752    | 49.78427 |

Totals : 757.75699 91.18081

Enriched sample:

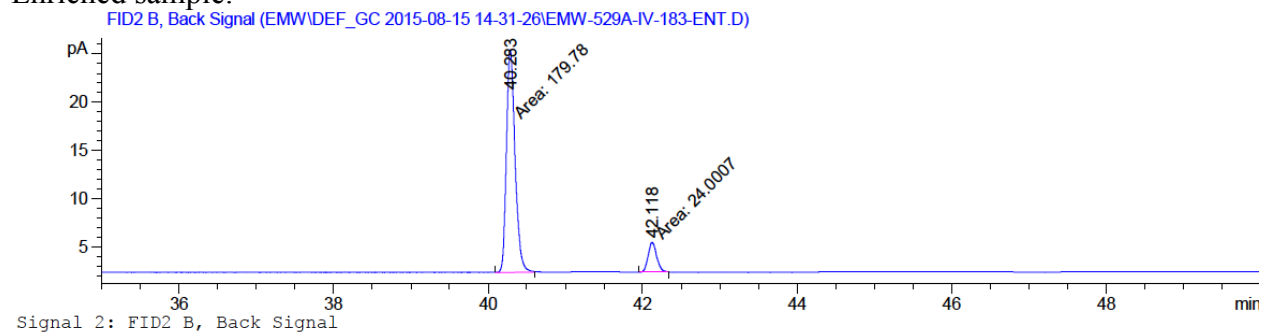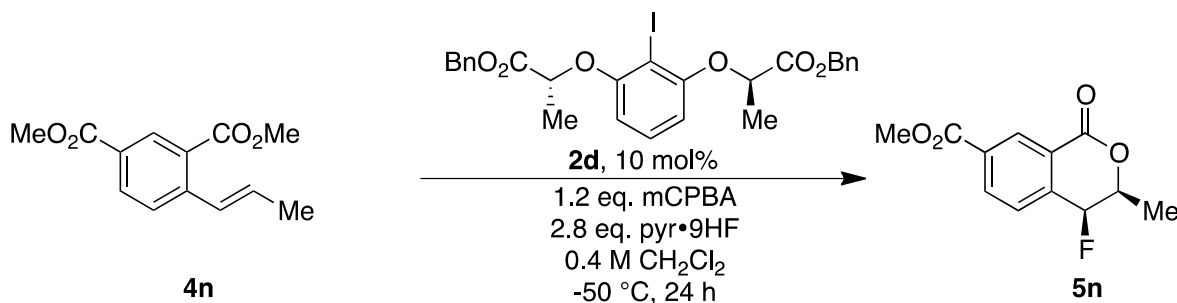

**methyl 4-fluoro-3-methyl-1-oxisochromane-7-carboxylate 5n.** Following the “general procedure for the synthesis of products 5a-o” on a 1 mmol scale, fluorolactone **5n** was isolated as a white solid (83 mg, 35% yield).

TLC (hexanes:EtOAc 2:1)

R<sub>f</sub> = 0.24, stained by KMnO<sub>4</sub>

<sup>1</sup>H-NMR (500 MHz, CDCl<sub>3</sub>)

δ 8.81 (s, 1H), 8.34 (dt, *J* = 8.0, 1.5 Hz, 1H), 7.62 (dd, *J* = 8.0, 2.0 Hz, 1H), 5.38 (dd, *J* = 49.0, 1.5 Hz, 1H), 4.75 (dq, *J* = 27.0, 7.0, 1.5 Hz, 1H), 3.96 (s, 3H), 1.64 (dd, *J* = 6.5, 1.0 Hz, 3H).

<sup>13</sup>C-NMR (125 MHz, CDCl<sub>3</sub>)

δ 165.3, 162.9, 138.3 (d, *J* = 17.5 Hz), 135.0 (d, *J* = 3.0 Hz), 133.2 (d, *J* = 3.5 Hz), 131.7 (d, *J* = 2.5 Hz), 129.0 (d, *J* = 3.5 Hz), 125.1 (d, *J* = 2.0 Hz), 84.8 (d, *J* = 183.0 Hz), 75.6 (d, *J* = 21.5 Hz), 52.7, 15.8.

<sup>19</sup>F-NMR (470 MHz, CDCl<sub>3</sub>)

δ -185.2 (dd, *J* = 50.0, 27.0 Hz).



HRMS (ESI+)

Calculated for  $C_{12}H_{11}FO_4$  (M+H)<sup>+</sup>: 239.0714

Found: 239.0725

IR (thin film,  $cm^{-1}$ )

2995, 2954, 1720, 1304, 1234, 1134, 1082, 1037, 989, 969, 944, 897, 770, 761, 731, 698, 584

$[\alpha]_D^{23} +64.6$  (*c* 1.0,  $CHCl_3$ )

70% *ee*, Chiral GC ( $\beta$ -Cyclosil, 60 °C to 200 °C, 10 psi);  $t_R$ (major) = 82.3 min,  $t_R$ (minor) = 82.7 min.

Racemic sample:

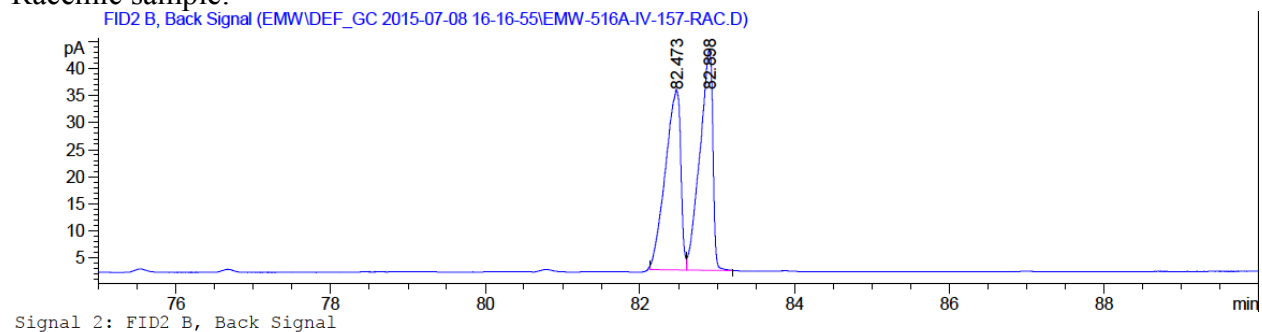

Enriched sample:

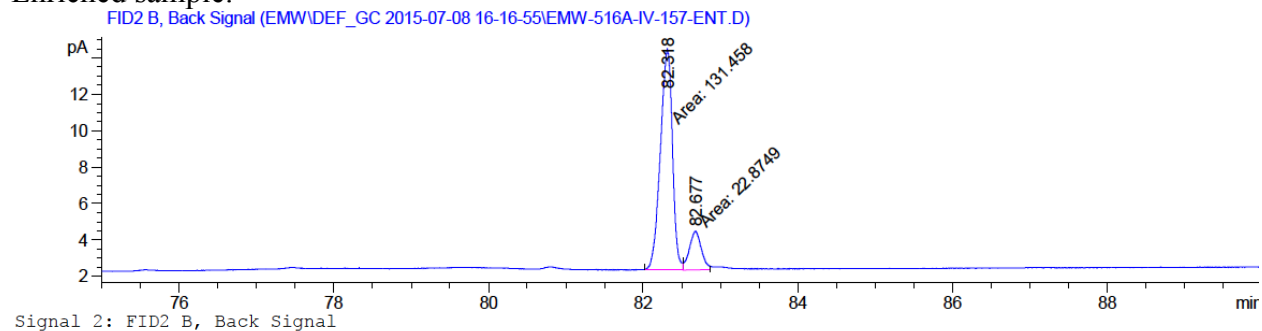

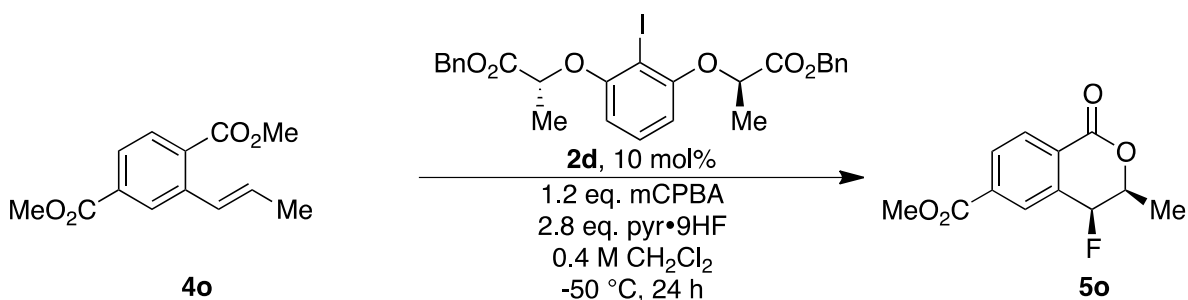

**methyl 4-fluoro-3-methyl-1-oxisochromane-6-carboxylate 5o.** Following the “general procedure for the synthesis of products 5a-o” on a 1 mmol scale, fluorolactone **5o** was isolated as a white solid (121 mg, 51% yield).

TLC (hexanes:EtOAc 1:1)

$R_f = 0.14$ , stained by  $\text{KMnO}_4$

$^1\text{H-NMR}$  (500 MHz,  $\text{CDCl}_3$ )

$\delta$  8.22 (app s, 2H), 8.17-8.15 (m, 1H), 5.36 (dd,  $J = 49.0, 1.5$  Hz, 1H), 4.73 (dq,  $J = 27.5, 6.5, 1.5$  Hz, 1H), 3.94 (s, 3H), 1.63 (d,  $J = 7.0$  Hz, 3H).

$^{13}\text{C-NMR}$  (125 MHz,  $\text{CDCl}_3$ )

$\delta$  165.3, 162.9, 135.2 (d,  $J = 2.5$  Hz), 134.8 (d,  $J = 17.5$  Hz), 131.9 (d,  $J = 3.5$  Hz), 130.6 (d,  $J = 2.5$  Hz), 130.0 (d,  $J = 3.0$  Hz), 128.1 (d,  $J = 2.0$  Hz), 84.9 (d,  $J = 181.5$  Hz), 75.8 (d,  $J = 21.0$  Hz), 52.8, 16.0 (d,  $J = 4.5$  Hz).

$^{19}\text{F-NMR}$  (470 MHz,  $\text{CDCl}_3$ )

$\delta$  -183.7 (dd,  $J = 49.0, 27.5$  Hz).

HRMS (ESI+)

Calculated for  $\text{C}_{12}\text{H}_{11}\text{FO}_4$  ( $\text{M}+\text{H}$ ) $^+$ : 239.0714

Found: 239.0720

IR (thin film,  $\text{cm}^{-1}$ )

2997, 2956, 1720, 1267, 1232, 1202, 1132, 1113, 1084, 923, 907, 755, 747, 729, 713, 691

$[\alpha]_D^{23} +40.0$  ( $c$  1.0,  $\text{CHCl}_3$ )

58% *ee*, Chiral GC ( $\beta$ -Cyclosil, 60  $^\circ\text{C}$  to 200  $^\circ\text{C}$ , 10 psi);  $t_R$ (major) = 79.8 min,  $t_R$ (minor) = 81.3 min.

Racemic sample:

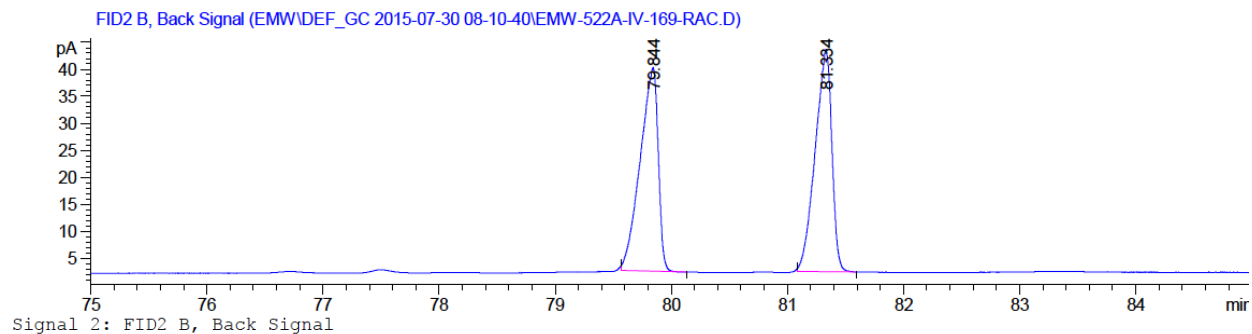

| Peak # | RetTime [min] | Type | Width [min] | Area [pA*s] | Height [pA] | Area %   |
|--------|---------------|------|-------------|-------------|-------------|----------|
| 1      | 79.844        | BB   | 0.1443      | 406.93326   | 37.71641    | 49.75588 |
| 2      | 81.334        | BB   | 0.1303      | 410.92630   | 41.08205    | 50.24412 |

Totals : 817.85956 78.79846

Enriched sample:

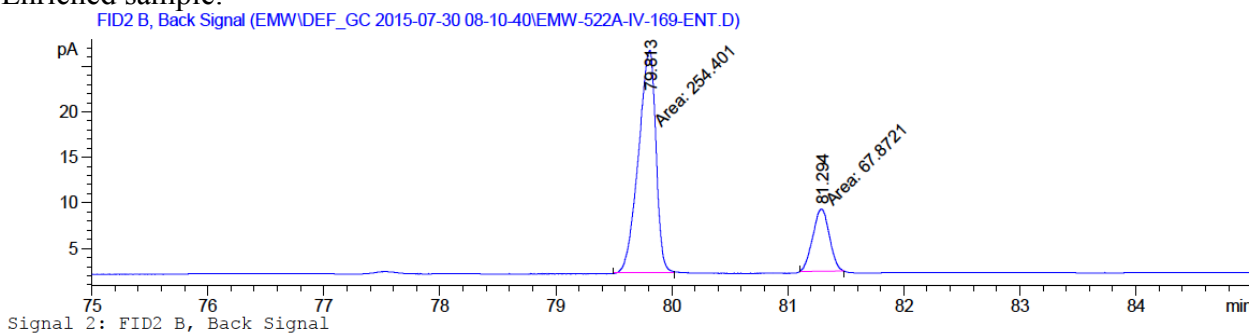

| Peak # | RetTime [min] | Type | Width [min] | Area [pA*s] | Height [pA] | Area %   |
|--------|---------------|------|-------------|-------------|-------------|----------|
| 1      | 79.813        | MM   | 0.1741      | 254.40073   | 24.36075    | 78.93956 |
| 2      | 81.294        | MM   | 0.1655      | 67.87207    | 6.83387     | 21.06044 |

Totals : 322.27280 31.19461

## VI. Table 3. Fluorolactonization of alkene substituted substrates

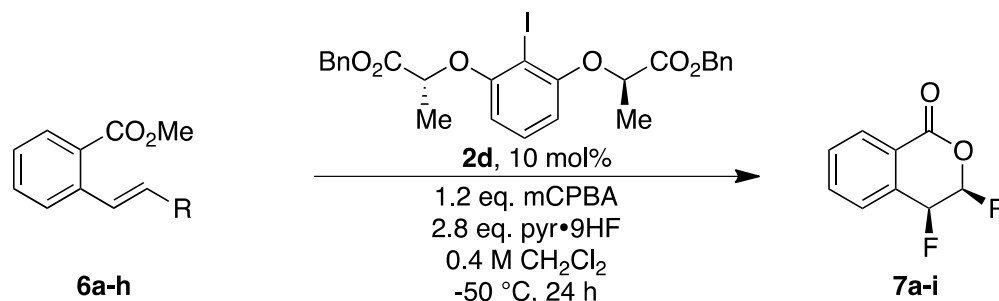**General procedure for the synthesis of products 7a-i.**

To a 7 mL low-density polyethylene vial with snap cap charged with a Teflon PTFE coated stir bar was added mCPBA (77%, 269 mg, 1.2 mmol, 1.2 eq.). The reaction vial was cooled in a dry ice/acetone bath to  $<-60$  °C. To the cooled vial was added aryl iodide catalyst **2d** (56.0 mg, 0.10 mmol, 10 mol%) as a solution in CH<sub>2</sub>Cl<sub>2</sub> (1.5 mL) followed by pyr•9HF (70% HF, 0.65 mL, 25 mmol HF, 25 eq. HF). The alkene **6a-h** (1.0 mmol) was added as a solution in CH<sub>2</sub>Cl<sub>2</sub> (1.0 mL, 0.40 M total concentration). The tube was capped and transferred to a -50 °C cryocool with vigorous stirring (vigorous stirring of the heterogeneous mixture is important to ensure reproducible conversion) at -50 °C for 24 h. After this time, the crude reaction suspension was quenched by being added to a cooled (-78 °C) suspension of basic alumina (2.5 g) in CH<sub>2</sub>Cl<sub>2</sub> (5.0 mL). The resulting suspension was warmed to 23 °C and stirred at this temperature for 10 min. The suspension was filtered through a plug of basic alumina, eluting with CH<sub>2</sub>Cl<sub>2</sub>. The solution was concentrated under reduced pressure. The resulting residue was dry loaded onto celite and purified by column chromatography on silica gel (hexanes:EtOAc 100:0 → 80:20) to afford fluorolactone **7a-i**.

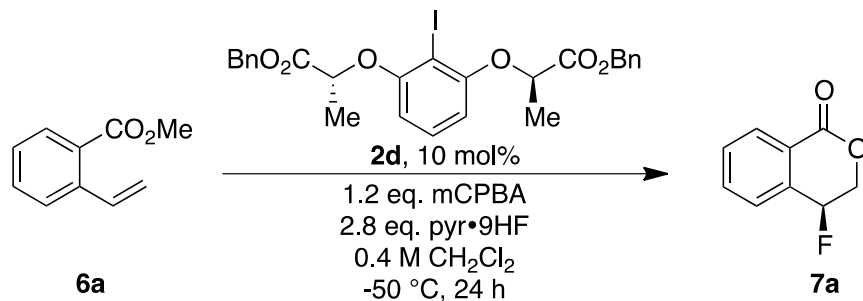

**4-fluoroisochroman-1-one 7a.** Following the “general procedure for the synthesis of products 7a-i” on a 1 mmol scale, fluorolactone **7a** was isolated as a clear colorless oil (81.4 mg, 49% yield).

TLC (hexanes:EtOAc 4:1)

R<sub>f</sub> = 0.16, stained by KMnO<sub>4</sub>

<sup>1</sup>H-NMR (500 MHz, CDCl<sub>3</sub>)

δ 8.21 (d, *J* = 7.5 Hz, 1H), 7.72 (t, *J* = 7.5 Hz, 1H), 7.64 (t, *J* = 7.5 Hz, 1H), 7.56 (d, *J* = 7.5 Hz, 1H), 5.59 (ap. dt, *J* = 49.5, 2.5 Hz, 1H), 4.86 (ddd, *J* = 16.1, 13.2 Hz, 3.4 Hz, 1H), 4.64 (ddd, *J* = 33.5, 12.5, 2.5 Hz, 1H).

<sup>13</sup>C-NMR (125 MHz, CDCl<sub>3</sub>)

δ 163.1, 134.5 (d, *J* = 17.5 Hz), 134.4 (d, *J* = 3.0 Hz), 131.2 (d, *J* = 3.5 Hz), 130.5 (d, *J* = 2.0 Hz), 128.1 (d, *J* = 3.5 Hz), 124.8 (d, *J* = 2.0 Hz), 82.9 (d, *J* = 177.5 Hz), 69.7 (d, *J* = 24.5 Hz).

<sup>19</sup>F-NMR (470 MHz, CDCl<sub>3</sub>)

δ -171.5 (ddd, *J* = 49.5, 34.0, 12.0 Hz).

HRMS (ESI+)

Calculated for C<sub>9</sub>H<sub>7</sub>FO<sub>2</sub> (M+H)<sup>+</sup>: 167.0503  
 Found: 167.0499

IR (thin film, cm<sup>-1</sup>)

2958, 1721, 1396, 1279, 1241, 1129, 1053, 1028, 961, 865, 767, 751, 716, 696, 606

[α]<sub>D</sub><sup>23</sup> +40.4 (*c* 1.0, CHCl<sub>3</sub>)

87% *ee*, Chiral GC (β-Cyclosil, 60 °C to 180 °C, 10 psi); t<sub>R</sub>(major) = 29.6 min, t<sub>R</sub>(minor) = 29.8 min.

Racemic sample:

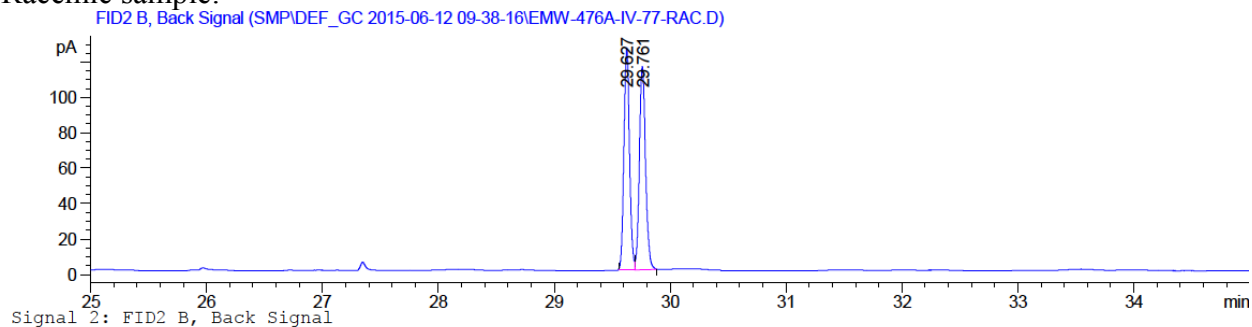

| Peak # | RetTime [min] | Type | Width [min] | Area [pA*s] | Height [pA] | Area %   |
|--------|---------------|------|-------------|-------------|-------------|----------|
| 1      | 29.627        | BV   | 0.0501      | 419.01712   | 125.53122   | 49.60110 |
| 2      | 29.761        | VB   | 0.0569      | 425.75674   | 114.73489   | 50.39890 |

Totals : 844.77386 240.26611

Enriched sample:

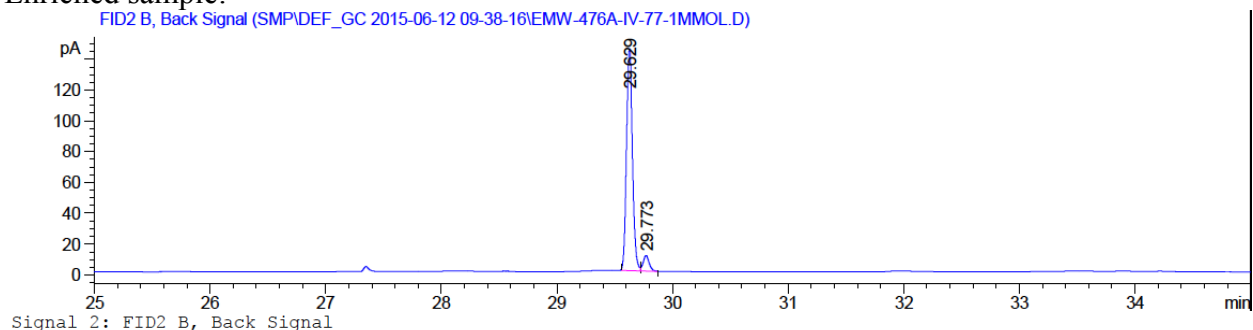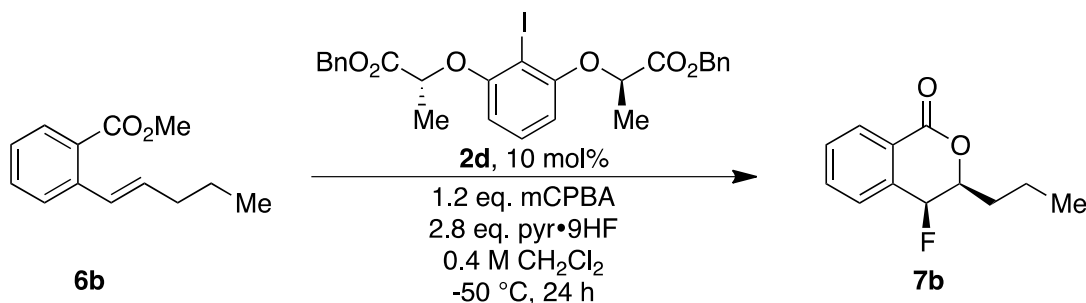

**4-fluoro-3-propylisochroman-1-one 7b.** Following the “general procedure for the synthesis of products 7a-i” on a 1 mmol scale, fluorolactone **7b** was isolated as a white solid (129 mg, 62% yield).

TLC (hexanes:EtOAc 4:1)

$R_f = 0.26$ , stained by  $\text{KMnO}_4$

$^1\text{H-NMR}$  (500 MHz,  $\text{CDCl}_3$ )

$\delta$  8.19 (d,  $J = 7.5$  Hz, 1H), 7.69 (tt,  $J = 7.5, 1.5$  Hz, 1H), 7.62 (tdd,  $J = 7.5, 2.0, 1.5$  Hz, 1H), 7.52 (ddd,  $J = 7.5, 2.5, 1.5$  Hz, 1H), 5.37 (dd,  $J = 49.5, 1.5$  Hz, 1H), 4.53 (dddd,  $J = 29.0, 8.3, 5.5, 1.5$  Hz, 1H), 2.13-2.03 (m, 1H), 1.94-1.84 (m, 1H), 1.73-1.52 (m, 2H), 1.02 (t,  $J = 7.5$  Hz, 3H).

$^{13}\text{C-NMR}$  (125 MHz,  $\text{CDCl}_3$ )

$\delta$  163.9, 134.6 (d,  $J = 17.0$  Hz), 134.2 (d,  $J = 3.0$  Hz), 131.3 (d,  $J = 3.5$  Hz), 130.4 (d,  $J = 3.0$  Hz), 128.8 (d,  $J = 3.5$  Hz), 125.1 (d,  $J = 2.5$  Hz), 84.6 (d,  $J = 180.5$  Hz), 79.2 (d,  $J = 22.0$  Hz), 32.2 (d,  $J = 3.5$  Hz), 18.2, 13.8.

$^{19}\text{F-NMR}$  (470 MHz,  $\text{CDCl}_3$ )

$\delta$  -182.2 (dd,  $J = 49.5, 28.5$  Hz).

HRMS (ESI+)

Calculated for C<sub>12</sub>H<sub>13</sub>FO<sub>2</sub> (M+H)<sup>+</sup>: 209.0972

Found: 209.0978

IR (thin film, cm<sup>-1</sup>)

2962, 2875, 1718, 1607, 1463, 1277, 1125, 979, 903, 718, 625

[α]<sub>D</sub><sup>23</sup> +46.2 (c 1.0, CHCl<sub>3</sub>)

95% *ee*, Chiral HPLC (CHIRALPAK AD-H, 3% isopropanol in hexanes, 1.0 mL/min, λ = 230 nm); t<sub>R</sub>(major) = 16.2 min, t<sub>R</sub>(minor) = 20.1 min.

Racemic sample:

DAD1 C, Sig=230,4 Ref=450,100 (EMW\DEF\_LC 2015-06-09 13-43-24\EMW-469A-IV-63-RAC2.D)

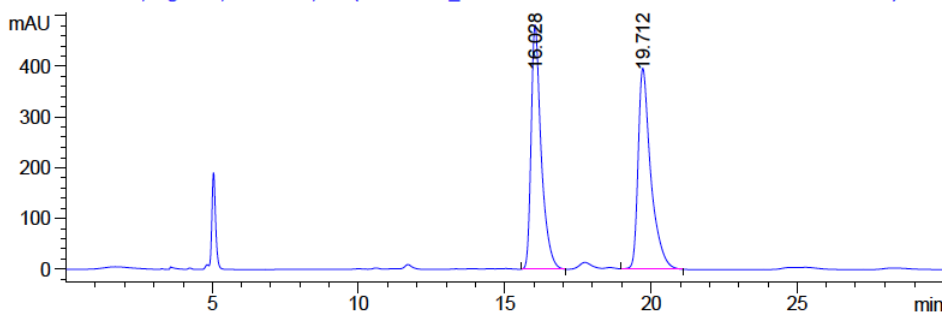

Signal 3: DAD1 C, Sig=230,4 Ref=450,100

| Peak # | RetTime [min] | Type | Width [min] | Area [mAU*s] | Height [mAU] | Area %  |
|--------|---------------|------|-------------|--------------|--------------|---------|
| 1      | 16.028        | BB   | 0.3528      | 1.14844e4    | 480.63147    | 48.9924 |
| 2      | 19.712        | VB   | 0.4443      | 1.19568e4    | 395.92218    | 51.0076 |

Totals : 2.34412e4 876.55365

Enriched sample:

DAD1 C, Sig=230,4 Ref=450,100 (EMW\DEF\_LC 2015-06-09 13-43-24\EMW-469A-IV-63-VIAL.D)

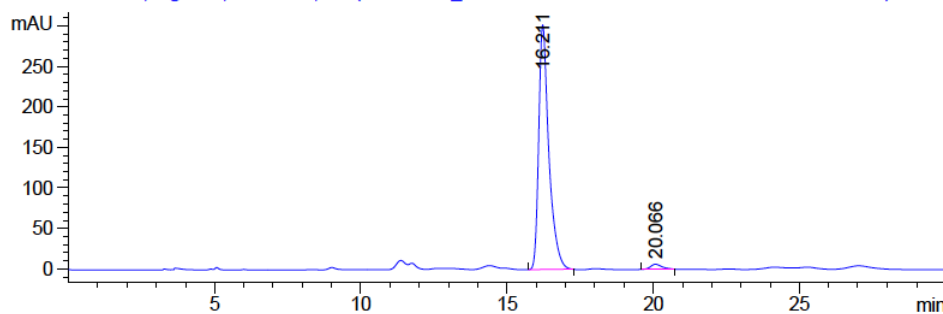

Signal 3: DAD1 C, Sig=230,4 Ref=450,100

| Peak # | RetTime [min] | Type | Width [min] | Area [mAU*s] | Height [mAU] | Area %  |
|--------|---------------|------|-------------|--------------|--------------|---------|
| 1      | 16.211        | BB   | 0.3573      | 7288.53760   | 302.28888    | 97.5958 |
| 2      | 20.066        | BB   | 0.4193      | 179.54802    | 6.39947      | 2.4042  |

Totals : 7468.08562 308.68835

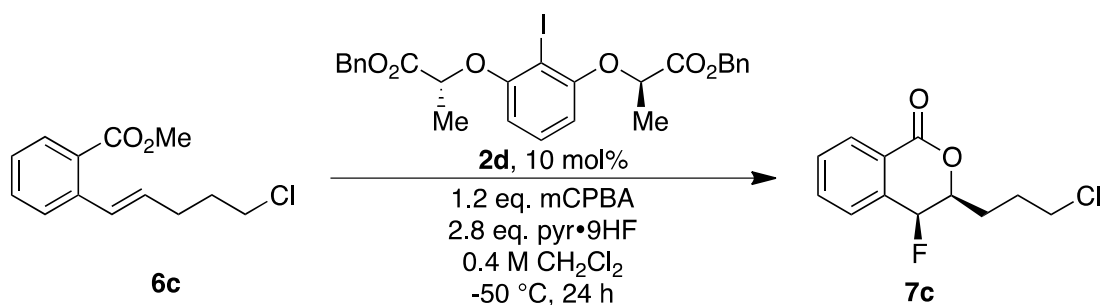

**3-(3-chloropropyl)-4-fluoroisochroman-1-one 7c.** Following the “general procedure for the synthesis of products 7a-i” on a 1 mmol scale, fluorolactone **7c** was isolated as a white solid (146 mg, 60% yield).

TLC (hexanes:EtOAc 4:1)

$R_f = 0.14$ , stained by  $\text{KMnO}_4$

$^1\text{H-NMR}$  (500 MHz,  $\text{CDCl}_3$ )

$\delta$  8.20 (d,  $J = 7.5$  Hz, 1H), 7.71 (tt,  $J = 7.5, 1.5$  Hz, 1H), 7.64 (tt,  $J = 7.5, 1.5$  Hz, 1H), 7.53 (d,  $J = 7.5$  Hz, 1H), 5.38 (d,  $J = 49.5$  Hz, 1H), 4.57 (dddd,  $J = 28.0, 8.5, 4.4, 1.5$  Hz, 1H), 3.73-3.60 (m, 2H), 2.30-2.16 (m, 2H), 2.15-1.98 (m, 2H).

$^{13}\text{C-NMR}$  (125 MHz,  $\text{CDCl}_3$ )

$\delta$  163.5, 134.4 (d,  $J = 18.0$  Hz), 134.4 (d,  $J = 3.0$  Hz), 131.4 (d,  $J = 4.0$  Hz), 130.5 (d,  $J = 3.0$  Hz), 128.8 (d,  $J = 3.5$  Hz), 125.0 (d,  $J = 2.0$  Hz), 84.9 (d,  $J = 181.0$  Hz), 78.6 (d,  $J = 21.0$  Hz), 44.5, 28.0, 27.9 (d,  $J = 4.0$  Hz).

$^{19}\text{F-NMR}$  (470 MHz,  $\text{CDCl}_3$ )

$\delta$  -181.4 (dd,  $J = 49.5, 28.5$  Hz).

HRMS (ESI+)

Calculated for  $\text{C}_{12}\text{H}_{12}\text{ClFO}_2$  ( $\text{M}+\text{H}$ ) $^+$ : 243.0583

Found: 243.0588

IR (thin film,  $\text{cm}^{-1}$ )

2961, 1732, 1275, 1240, 1124, 1092, 1029, 904, 765, 698

$[\alpha]_D^{23} +38.8$  ( $c$  1.0,  $\text{CHCl}_3$ )

95% *ee*, Chiral HPLC (CHIRALPAK OD-H, 5% isopropanol in hexanes, 1.0 mL/min,  $\lambda = 230$  nm);  $t_R(\text{major}) = 27.9$  min,  $t_R(\text{minor}) = 41.8$  min.



Racemic sample:

DAD1 C, Sig=230,4 Ref=450,100 (EMW\DEF\_LC 2015-06-11 15-44-16\EMW-471A-IV-67-RAC-ODH.D)

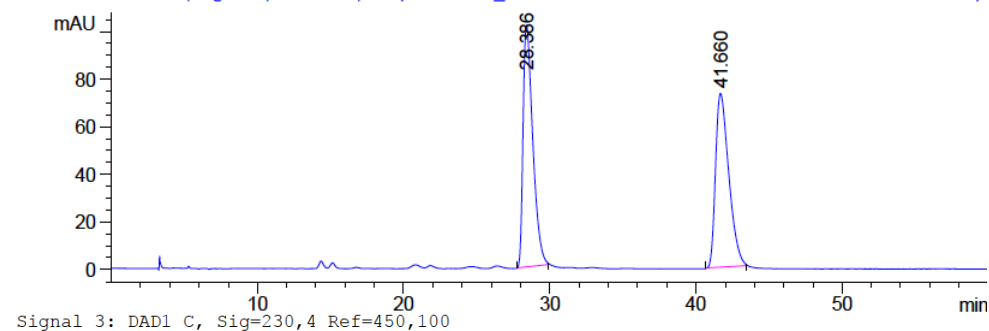

Enriched sample:

DAD1 C, Sig=230,4 Ref=450,100 (EMW\DEF\_LC 2015-06-11 15-44-16\EMW-471A-IV-67-1MMOL-ODH.D)

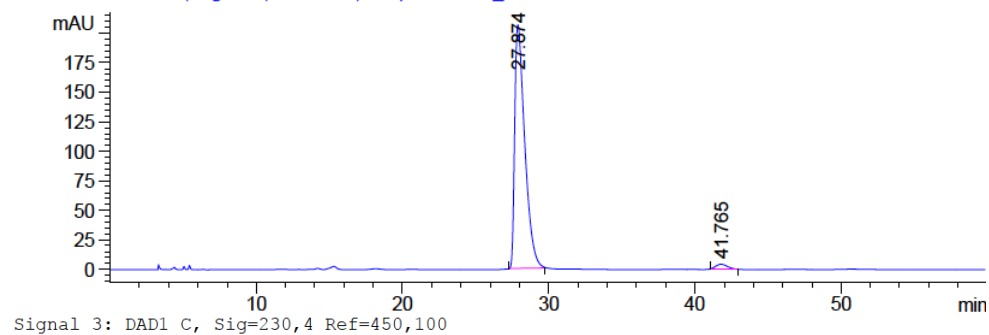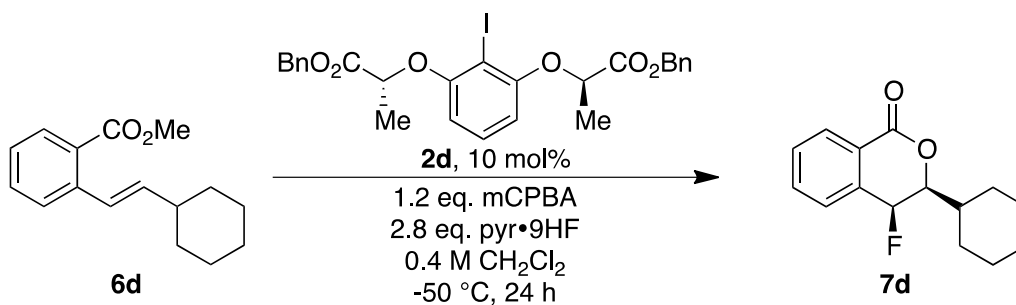

**3-cyclohexyl-4-fluoroisochroman-1-one 7d.** Following the “general procedure for the synthesis of products 7a-i” on a 1 mmol scale, fluorolactone **7d** was isolated as a white solid (144 mg, 58% yield).

TLC (hexanes:EtOAc 4:1)

$R_f = 0.37$ , stained by  $\text{KMnO}_4$

$^1\text{H-NMR}$  (500 MHz,  $\text{CDCl}_3$ )

$\delta$  8.20 (d,  $J = 7.5$  Hz, 1H), 7.70 (tt,  $J = 7.5, 1.5$  Hz, 1H), 7.63 (t,  $J = 7.5$  Hz, 1H), 7.52 (d,  $J = 7.5$  Hz, 1H), 5.53 (d,  $J = 49.5$  Hz, 1H), 4.17 (ddd,  $J = 31.0, 9.0, 1.5$  Hz, 1H), 2.40-2.30 (m, 1H), 2.19-2.06 (m, 1H), 2.03-1.94 (m, 1H), 1.88-1.78 (m, 2H), 1.78-1.68 (m, 1H), 1.47-1.28 (m, 2H), 1.28-1.05 (m, 3H).

$^{13}\text{C-NMR}$  (125 MHz,  $\text{CDCl}_3$ )

$\delta$  164.0, 134.5 (d,  $J = 17.0$  Hz), 134.2 (d,  $J = 3.0$  Hz), 131.3 (d,  $J = 3.5$  Hz), 130.4 (d,  $J = 3.0$  Hz), 129.0 (d,  $J = 3.5$  Hz), 125.4 (d,  $J = 2.0$  Hz), 83.7 (d,  $J = 21.5$  Hz), 83.0 (d,  $J = 180.5$  Hz), 37.9 (d,  $J = 1.5$  Hz), 29.4, 28.2, 26.2, 25.7, 25.4.

$^{19}\text{F-NMR}$  (470 MHz,  $\text{CDCl}_3$ )

$\delta$  -181.9 (dd,  $J = 49.5, 31.0$  Hz).

HRMS (ESI+)

Calculated for  $\text{C}_{15}\text{H}_{17}\text{FO}_2$  (M+H) $^+$ : 249.1285

Found: 249.1297

IR (thin film,  $\text{cm}^{-1}$ )

2927, 2853, 1720, 1278, 1120, 905, 896, 765, 733, 699

$[\alpha]_D^{23} +37.2$  ( $c$  1.0,  $\text{CHCl}_3$ )

92% *ee*, Chiral HPLC (CHIRALPAK OD-H, 5% isopropanol in hexanes, 1.0 mL/min,  $\lambda = 230$  nm);  $t_R$ (major) = 10.0 min,  $t_R$ (minor) = 14.3 min.

Racemic sample:

DAD1 C, Sig=230,4 Ref=450,100 (EMW\DEF\_LC 2015-06-11 15-44-16\EMW-472A-IV-69-RAC-ODH.D)

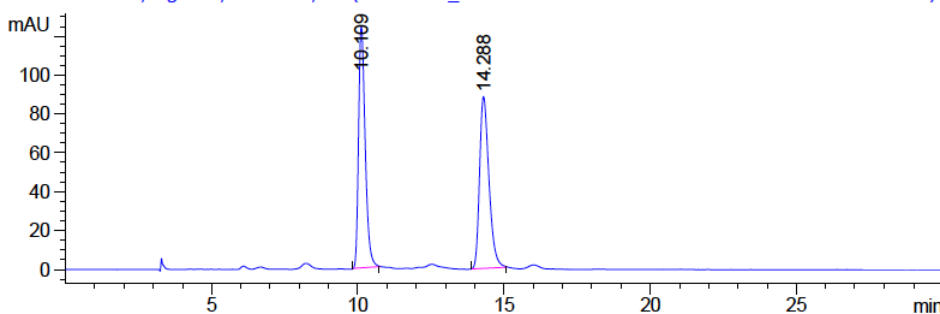

Signal 3: DAD1 C, Sig=230,4 Ref=450,100

| Peak # | RetTime [min] | Type | Width [min] | Area [mAU*s] | Height [mAU] | Area %  |
|--------|---------------|------|-------------|--------------|--------------|---------|
| 1      | 10.109        | BB   | 0.2422      | 1965.89319   | 124.51721    | 49.8751 |
| 2      | 14.288        | BB   | 0.3427      | 1975.73926   | 88.42347     | 50.1249 |

Totals : 3941.63245 212.94068

Enriched sample:

DAD1 C, Sig=230,4 Ref=450,100 (EMW/DEF\_LC 2015-06-11 15-44-16)EMW-472A-IV-69-1MMOL-ODH.

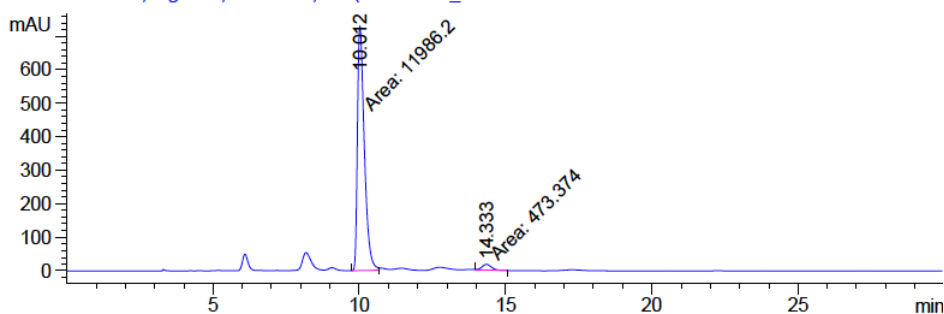

Signal 3: DAD1 C, Sig=230,4 Ref=450,100

| Peak # | RetTime [min] | Type | Width [min] | Area [mAU*s] | Height [mAU] | Area %  |
|--------|---------------|------|-------------|--------------|--------------|---------|
| 1      | 10.012        | MM   | 0.2734      | 1.19862e4    | 730.63019    | 96.2007 |
| 2      | 14.333        | MM   | 0.4168      | 473.37363    | 18.92793     | 3.7993  |

Totals : 1.24595e4 749.55812

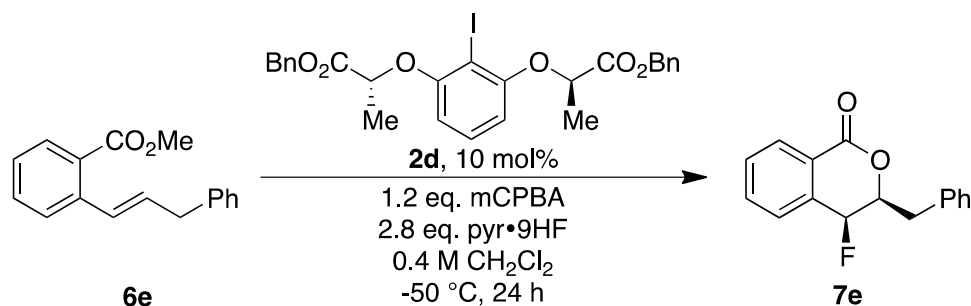

**3-benzyl-4-fluoroisochroman-1-one 7e.** Following the “general procedure for the synthesis of products 7a-i” on a 1 mmol scale, fluorolactone **7e** was isolated as a white solid (141 mg, 55% yield).

TLC (hexanes:EtOAc 4:1)

R<sub>f</sub> = 0.34, stained by KMnO<sub>4</sub>

<sup>1</sup>H-NMR (500 MHz, CDCl<sub>3</sub>)

δ 8.21 (d, *J* = 7.0 Hz, 1H), 7.71-7.60 (m, 2H), 7.45 (m, 1H), 7.42-7.30 (m, 5H), 5.24 (dd, *J* = 49.5, 1.5 Hz, 1H), 4.71 (dddd, *J* = 28.3, 8.3, 6.8, 1.0 Hz, 1H), 3.40-3.32 (m, 2H).

$^{13}\text{C}$ -NMR (125 MHz,  $\text{CDCl}_3$ )

$\delta$  163.7, 135.3, 134.3 (d,  $J=3.0$  Hz), 134.2, 131.4 (d,  $J=3.5$  Hz), 130.5 (d,  $J=2.5$  Hz), 129.7, 129.0 (d,  $J=3.0$  Hz), 128.9, 127.3, 125.1 (d,  $J=2.0$  Hz), 83.0 (d,  $J=140.5$  Hz), 80.3 (d,  $J=22.0$  Hz), 36.5 (d,  $J=3.5$  Hz).

$^{19}\text{F}$ -NMR (470 MHz,  $\text{CDCl}_3$ )

$\delta$  -182.2 (dd,  $J=49.5, 28.5$  Hz).

HRMS (ESI+)

Calculated for  $\text{C}_{16}\text{H}_{13}\text{FO}_2$  (M+H) $^+$ : 257.0972

Found: 257.0981

IR (thin film,  $\text{cm}^{-1}$ )

3063, 3030, 2951, 1729, 1267, 1239, 1122, 1089, 999, 898, 762, 735, 717, 696, 584

$[\alpha]_{\text{D}}^{23} +22.4$  ( $c$  1.0,  $\text{CHCl}_3$ )

90% *ee*, Chiral HPLC (CHIRALPAK AD-H, 3% isopropanol in hexanes, 1.0 mL/min,  $\lambda = 230$  nm);  $t_{\text{R}}$ (major) = 45.8 min,  $t_{\text{R}}$ (minor) = 56.6 min.

Racemic sample:

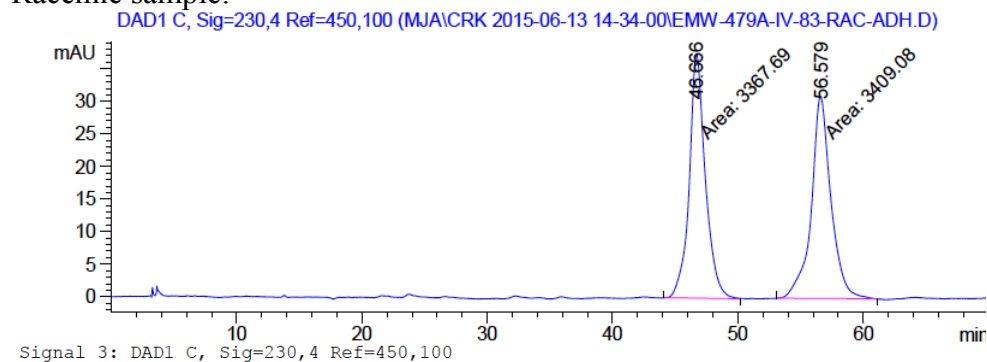

| Peak # | RetTime [min] | Type | Width [min] | Area [mAU*s] | Height [mAU] | Area %  |
|--------|---------------|------|-------------|--------------|--------------|---------|
| 1      | 46.666        | MM   | 1.4963      | 3367.69360   | 37.51128     | 49.6946 |
| 2      | 56.579        | MM   | 1.8296      | 3409.08276   | 31.05462     | 50.3054 |

Totals : 6776.77637 68.56590

Enriched sample:

DAD1 C, Sig=230,4 Ref=450,100 (MJA\CRK 2015-06-13 14-34-00\EMW-479A-IV-83-ENT-ADH.D)

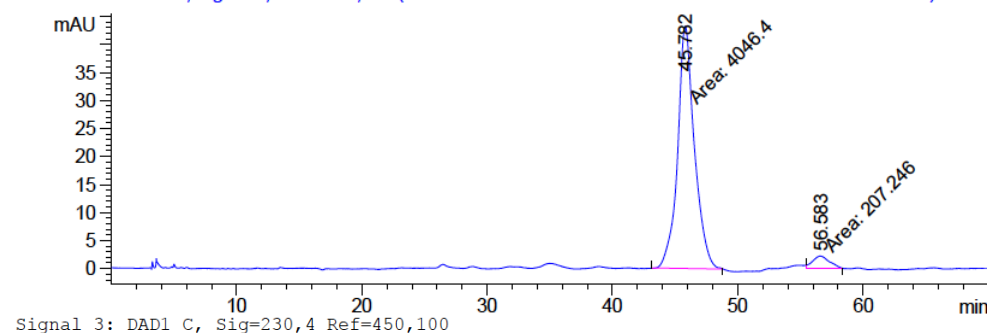

| Peak # | RetTime [min] | Type | Width [min] | Area [mAU*s] | Height [mAU] | Area %  |
|--------|---------------|------|-------------|--------------|--------------|---------|
| 1      | 45.782        | MM   | 1.5592      | 4046.39917   | 43.25206     | 95.1278 |
| 2      | 56.583        | MM   | 1.5617      | 207.24622    | 2.21174      | 4.8722  |

Totals :                                    4253.64539    45.46380

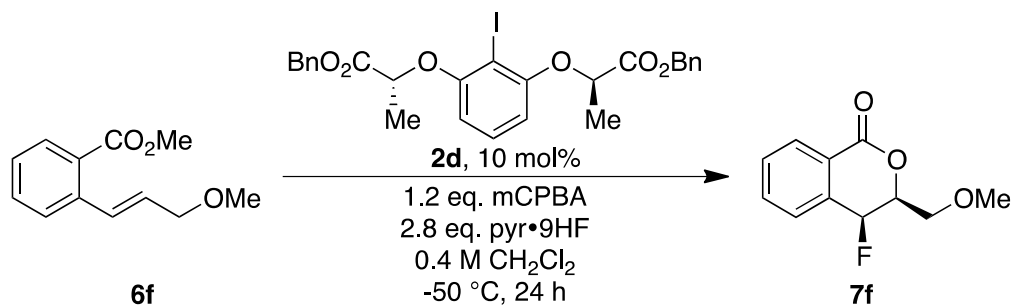

**4-fluoro-3-(methoxymethyl)isochroman-1-one 7f**. Following the “general procedure for the synthesis of products **7a-i**” on a 1 mmol scale, fluorolactone **7f** was isolated as a pale yellow solid (120 mg, 57% yield).

TLC (hexanes:EtOAc 4:1)

R<sub>f</sub> = 0.16, stained by KMnO<sub>4</sub>

<sup>1</sup>H-NMR (500 MHz, CDCl<sub>3</sub>)

δ 8.23 (d, *J* = 7.5 Hz, 1H), 7.73 (tt, *J* = 7.5, 1.5 Hz, 1H), 7.67 (tdd, *J* = 7.0, 2.0, 1.5 Hz, 1H), 7.57-7.54 (m, 1H), 5.58 (d, *J* = 49.5 Hz, 1H), 4.71 (dddd, *J* = 29.3, 7.8, 6.4, 1.5 Hz, 1H), 4.00-3.81 (m, 2H), 3.51 (s, 3H).

<sup>13</sup>C-NMR (125 MHz, CDCl<sub>3</sub>)

δ 163.1, 134.5 (d, *J* = 3.0 Hz), 134.1 (d, *J* = 17.0 Hz), 131.5 (d, *J* = 4.5 Hz), 130.5 (d, *J* = 2.5 Hz), 129.0 (d, *J* = 3.5 Hz), 125.1 (d, *J* = 2.0 Hz), 82.7 (d, *J* = 180.0 Hz), 77.5 (d, *J* = 20.0 Hz), 69.4 (d, *J* = 5.0 Hz), 59.6.

<sup>19</sup>F-NMR (470 MHz, CDCl<sub>3</sub>)

δ -182.7 (dd, *J* = 49.5, 29.0 Hz).

HRMS (ESI+)

Calculated for  $C_{11}H_{11}FO_3$  (M+H)<sup>+</sup>: 211.0765

Found: 211.0772

IR (thin film,  $cm^{-1}$ )

2929, 2820, 1729, 1270, 1236, 1205, 1112, 1090, 1028, 972, 901, 765, 725, 698

$[\alpha]_D^{23} +70.6$  (*c* 1.0,  $CHCl_3$ )

91% *ee*, Chiral HPLC (CHIRALPAK AD-H, 3% isopropanol in hexanes, 1.0 mL/min,  $\lambda = 230$  nm);  $t_R$ (minor) = 24.0 min,  $t_R$ (major) = 28.2 min.

Racemic sample:

DAD1 C, Sig=230,4 Ref=450,100 (MJA\CRK 2015-06-13 14-34-00\EMW-480A-IV-85-RAC-ADH.D)

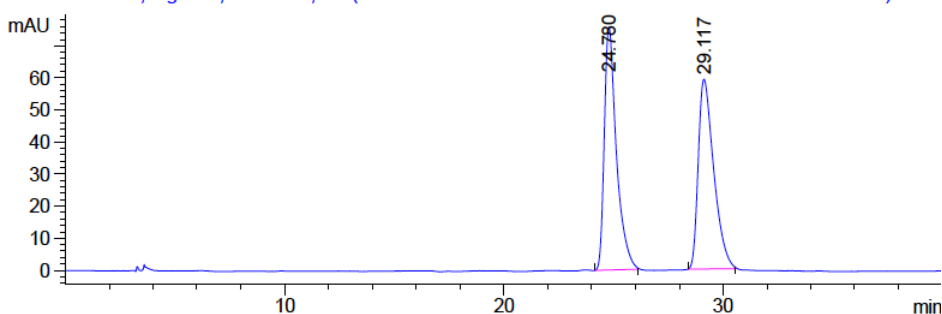

Signal 3: DAD1 C, Sig=230,4 Ref=450,100

| Peak # | RetTime [min] | Type | Width [min] | Area [mAU*s] | Height [mAU] | Area %  |
|--------|---------------|------|-------------|--------------|--------------|---------|
| 1      | 24.780        | BB   | 0.5717      | 2906.56152   | 75.73632     | 49.9255 |
| 2      | 29.117        | BB   | 0.7200      | 2915.23145   | 59.25201     | 50.0745 |

Totals : 5821.79297 134.98833

Enriched sample:

DAD1 C, Sig=230,4 Ref=450,100 (MJA\CRK 2015-06-13 14-34-00\EMW-480A-IV-85-ENT-ADH.D)

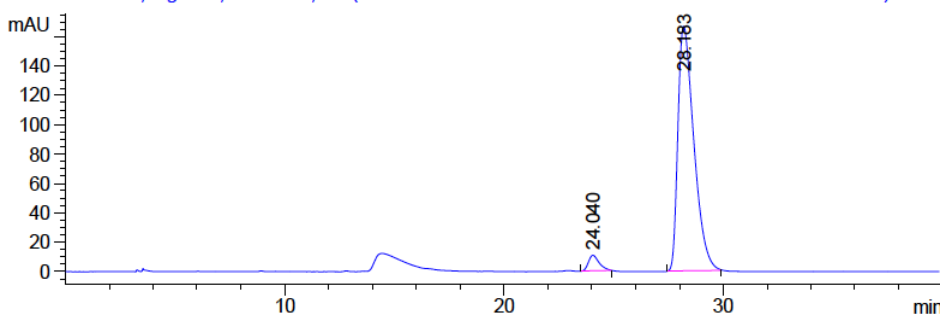

Signal 3: DAD1 C, Sig=230,4 Ref=450,100

| Peak # | RetTime [min] | Type | Width [min] | Area [mAU*s] | Height [mAU] | Area %  |
|--------|---------------|------|-------------|--------------|--------------|---------|
| 1      | 24.040        | BB   | 0.5122      | 377.89301    | 10.80137     | 4.2904  |
| 2      | 28.183        | BB   | 0.7616      | 8430.06152   | 166.79672    | 95.7096 |

Totals : 8807.95453 177.59809

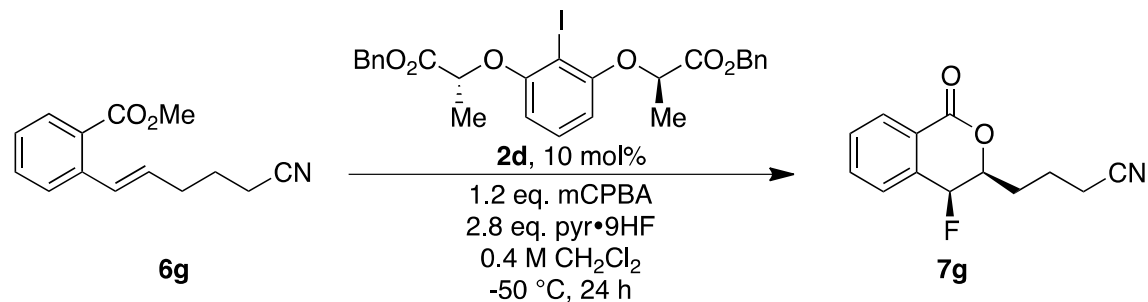

**4-(4-fluoro-1-oxoisochroman-3-yl)butanenitrile 7g.** Following the “general procedure for the synthesis of products 7a-i” on a 1 mmol scale, fluorolactone **7g** was isolated as a white solid (95.6 mg, 41% yield).

TLC (hexanes:EtOAc 4:1)

$R_f$  = 0.10, stained by  $\text{KMnO}_4$

$^1\text{H-NMR}$  (500 MHz,  $\text{CDCl}_3$ )

$\delta$  8.21 (d,  $J$  = 8.0 Hz, 1H), 7.72 (tt,  $J$  = 7.5, 1.5 Hz, 1H), 7.65 (tq,  $J$  = 7.0, 1.5 Hz, 1H), 7.54 (d,  $J$  = 7.0 Hz, 1H), 5.38 (dd,  $J$  = 50.0, 1.5 Hz, 1H), 4.57 (dddd,  $J$  = 28.0, 10.0, 3.9, 1.5 Hz, 1H), 2.59-2.41 (m, 2H), 2.36-2.22 (m, 1H), 2.20-2.02 (m, 2H), 2.01-1.88 (m, 1H).

$^{13}\text{C-NMR}$  (125 MHz,  $\text{CDCl}_3$ )

$\delta$  163.3, 134.5 (d,  $J$  = 3.0 Hz), 134.2 (d,  $J$  = 17.0 Hz), 131.5 (d,  $J$  = 3.5 Hz), 130.5 (d,  $J$  = 3.0 Hz), 128.9 (d,  $J$  = 3.0 Hz), 124.8 (d,  $J$  = 2.5 Hz), 119.1, 84.8 (d,  $J$  = 182.0 Hz), 78.3 (d,  $J$  = 22.0 Hz), 29.5 (d,  $J$  = 3.5 Hz), 21.2, 17.0.

$^{19}\text{F-NMR}$  (470 MHz,  $\text{CDCl}_3$ )

$\delta$  -180.9 (dd,  $J$  = 50.0, 28.0 Hz).

HRMS (ESI+)

Calculated for  $\text{C}_{13}\text{H}_{12}\text{FNO}_2$  ( $\text{M}+\text{H}$ )<sup>+</sup>: 234.0925

Found: 234.0932

IR (thin film,  $\text{cm}^{-1}$ )

2949, 1728, 1607, 1272, 1241, 1125, 1092, 766, 698

$[\alpha]_D^{23}$  +39.8 ( $c$  1.0,  $\text{CHCl}_3$ )

90% *ee*, Chiral HPLC (CHIRALPAK OD-H, 20% isopropanol in hexanes, 1.0 mL/min,  $\lambda$  = 238 nm);  $t_R$ (major) = 28.7 min,  $t_R$ (minor) = 38.2 min.

## Racemic sample:

\*DAD1, Sig=238.00, 2.00 Ref=off, EXT of EMW-508A-IV-141-ODH-RAC.D

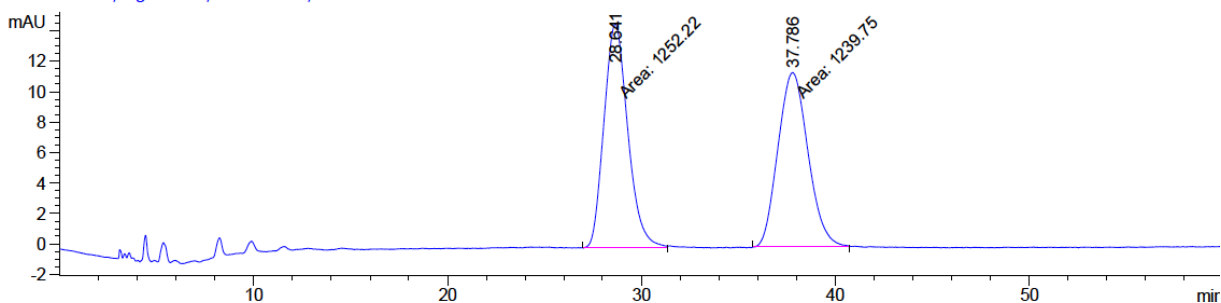

Signal 5: DAD1, Sig=238.00, 2.00 Ref=off, EXT

Signal has been modified after loading from rawdata file!

| Peak # | RetTime [min] | Type | Width [min] | Area [mAU*s] | Height [mAU] | Area %  |
|--------|---------------|------|-------------|--------------|--------------|---------|
| 1      | 28.641        | MM   | 1.4218      | 1252.21875   | 14.67923     | 50.2501 |
| 2      | 37.786        | MM   | 1.8016      | 1239.75171   | 11.46880     | 49.7499 |

## Enriched sample:

\*DAD1, Sig=238.00, 2.00 Ref=off, EXT of EMW-508A-IV-141-ODH-ENT.D

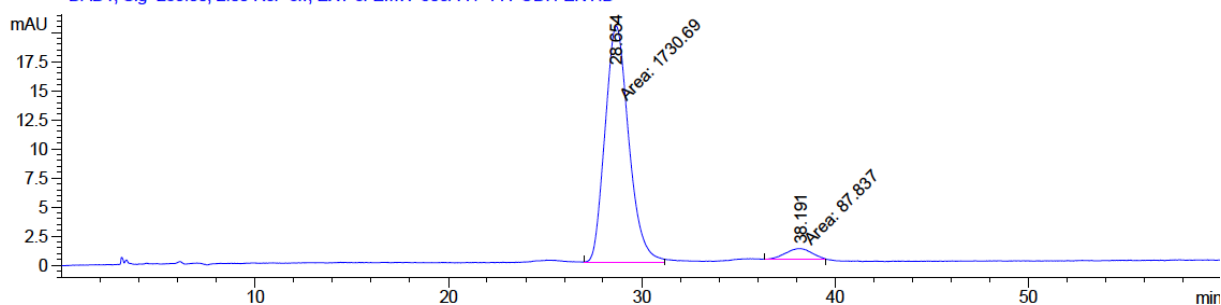

Signal 5: DAD1, Sig=238.00, 2.00 Ref=off, EXT

Signal has been modified after loading from rawdata file!

| Peak # | RetTime [min] | Type | Width [min] | Area [mAU*s] | Height [mAU] | Area %  |
|--------|---------------|------|-------------|--------------|--------------|---------|
| 1      | 28.654        | MM   | 1.4225      | 1730.69482   | 20.27771     | 95.1699 |
| 2      | 38.191        | MM   | 1.5794      | 87.83695     | 9.26886e-1   | 4.8301  |

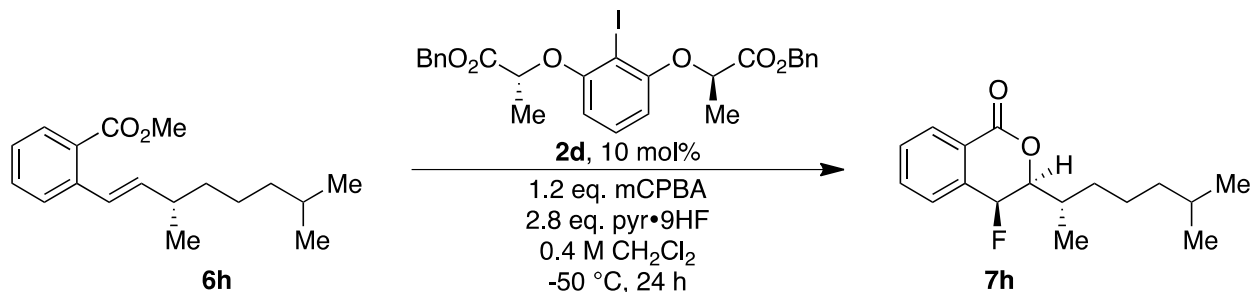

**(3*S*,4*S*)-4-fluoro-3-((*S*)-6-methylheptan-2-yl)isochroman-1-one 7h**. Following the “general procedure for the synthesis of products **7a-i**” on a 0.5 mmol scale, fluorolactone **7h** was isolated as a clear, colorless oil (68.5 mg, 49% yield) as a 6:1 mixture of diastereomers with **7i**.



TLC (hexanes:EtOAc 4:1)

$R_f = 0.35$ , stained by  $\text{KMnO}_4$

$^1\text{H-NMR}$  (500 MHz,  $\text{CDCl}_3$ ) (Major diastereomer)

$\delta$  8.21 (d,  $J = 7.5$  Hz, 1H), 7.71 (tt,  $J = 7.5, 1.5$  Hz, 1H), 7.64 (tdd,  $J = 7.5, 2.5, 1.5$  Hz, 1H), 7.53 (ddd,  $J = 7.5, 2.5, 1.0$  Hz, 1H), 5.53 (d,  $J = 49.5$  Hz, 1H), 4.19 (ddd,  $J = 31.0, 9.5, 1.5$  Hz, 1H), 2.32-2.23 (m, 1H), 1.96-1.88 (m, 1H), 1.61-1.53 (m, 1H), 1.51-1.41 (m, 1H), 1.35-1.20 (m, 4H), 1.15 (d,  $J = 6.0$  Hz, 3H), 0.90 (dd,  $J = 6.5, 2.0$  Hz, 6H).

$^{13}\text{C-NMR}$  (125 MHz,  $\text{CDCl}_3$ ) (Major diastereomer)

$\delta$  164.0, 134.6 (d,  $J = 17.0$  Hz), 134.2 (d,  $J = 2.5$  Hz), 131.3 (d,  $J = 4.0$  Hz), 130.4 (d,  $J = 3.0$  Hz), 129.0 (d,  $J = 4.0$  Hz), 125.3 (d,  $J = 2.0$  Hz), 83.4 (d,  $J = 182.0$  Hz), 83.2 (d,  $J = 21.5$  Hz), 39.1, 33.8, 32.4, 28.0, 24.0, 22.6 (d,  $J = 35.5$  Hz), 14.8.

$^{19}\text{F-NMR}$  (470 MHz,  $\text{CDCl}_3$ ) (Major diastereomer)

$\delta$  -182.5 (dd,  $J = 49.5, 31.0$  Hz).

HRMS (ESI+)

Calculated for  $\text{C}_{17}\text{H}_{23}\text{FO}_2$  ( $\text{M}+\text{H}$ ) $^+$ : 279.1755

Found: 279.1768

IR (thin film,  $\text{cm}^{-1}$ )

2952, 2927, 2867, 1720, 1463, 1275, 1242, 1119, 1091, 995, 894, 765, 736, 698

$[\alpha]_D^{23} +43.6$  ( $c$  1.0,  $\text{CHCl}_3$ )

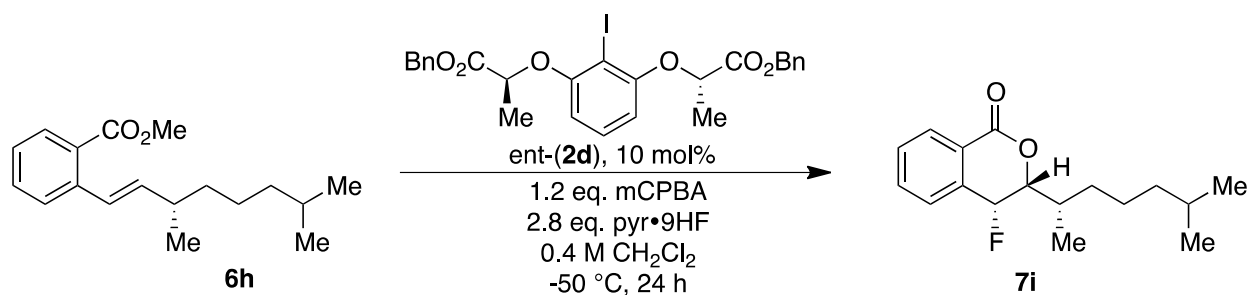

**(3*R*,4*R*)-4-fluoro-3-((*S*)-6-methylheptan-2-yl)isochroman-1-one 7i**. Following the “general procedure for the synthesis of products **7a-i**” on a 0.5 mmol scale, and using *ent*-(**2d**) as the catalyst, fluorolactone **7i** was isolated as a clear, colorless oil (79.2 mg, 57% yield) as a 6:1 mixture of diastereomers with **7h**.

TLC (hexanes:EtOAc 4:1)

$R_f = 0.35$ , stained by  $\text{KMnO}_4$

$^1\text{H-NMR}$  (500 MHz,  $\text{CDCl}_3$ ) (Major diastereomer)

$\delta$  8.19 (d,  $J = 7.5$  Hz, 1H), 7.69 (tt,  $J = 7.5, 1.5$  Hz, 1H), 7.62 (tdd,  $J = 7.5, 2.5, 1.5$  Hz, 1H), 7.51 (ddd,  $J = 7.5, 2.5, 1.0$  Hz, 1H), 5.54 (d,  $J = 50.0$  Hz, 1H), 4.19 (ddd,  $J = 31.0,$

8.5, 1.5 Hz, 1H), 2.29-2.20 (m, 1H), 1.71-1.61 (m, 1H), 1.60-1.52 (m, 1H), 1.50-1.39 (m, 1H), 1.39-1.22 (m, 4H), 1.20 (d,  $J = 6.5$  Hz, 3H), 0.89 (dd,  $J = 6.5, 1.5$  Hz, 6H).

$^{13}\text{C}$ -NMR (125 MHz,  $\text{CDCl}_3$ ) (Major diastereomer)

$\delta$  164.1, 134.7 (d,  $J = 17.0$  Hz), 134.2 (d,  $J = 3.0$  Hz), 131.3 (d,  $J = 4.0$  Hz), 130.4 (d,  $J = 3.0$  Hz), 128.9 (d,  $J = 4.0$  Hz), 125.3 (d,  $J = 2.0$  Hz), 83.6 (d,  $J = 180.5$  Hz), 83.5 (d,  $J = 22.5$  Hz), 39.0, 34.0, 32.3, 27.9, 24.4, 22.6 (d,  $J = 34.0$  Hz), 15.5.

$^{19}\text{F}$ -NMR (470 MHz,  $\text{CDCl}_3$ ) (Major diastereomer)

$\delta$  -181.1 (dd,  $J = 49.5, 31.5$  Hz).

HRMS (ESI+)

Calculated for  $\text{C}_{17}\text{H}_{23}\text{FO}_2$  (M+H) $^+$ : 279.1755

Found: 279.1768

IR (thin film,  $\text{cm}^{-1}$ )

2952, 2932, 2868, 1720, 1464, 1347, 1275, 1243, 1120, 1091, 992, 895, 765, 736, 698

$[\alpha]_{\text{D}}^{23}$  -46.0 ( $c$  1.0,  $\text{CHCl}_3$ )

## VII. Scheme 2. Comparing electrophilic and nucleophilic fluorinating reagents

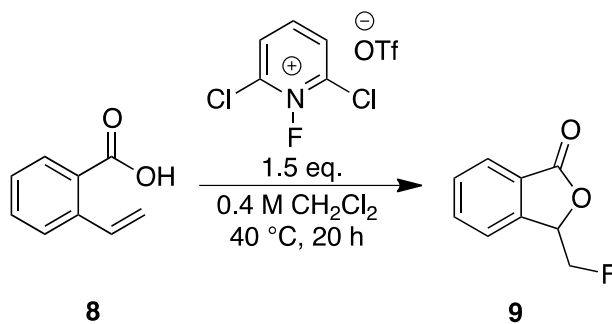

**3-(fluoromethyl)isobenzofuran-1(3H)-one 9**. To a 7 mL glass vial charged with a Teflon PTFE coated stir bar was added vinylbenzoic acid **8** (150 mg, 1.0 mmol, 1.0 eq.) and 2,6-dichloro-1-fluoropyridinium triflate (474 mg, 1.5 mmol, 1.5 eq.). The reaction vial was capped and placed under a nitrogen atmosphere. The vial was charged with  $\text{CH}_2\text{Cl}_2$  (2.5 mL) and sealed under nitrogen. The vial was placed in a 40 °C heating block with stirring for 20 h. After this time, the crude reaction was dry loaded onto celite and purified by column chromatography on silica gel (hexanes:EtOAc 100:0  $\rightarrow$  60:40) to afford fluorolactone **9** as a clear, colorless oil (107 mg, 65% yield).

$^1\text{H}$ -NMR (500 MHz,  $\text{CDCl}_3$ )

$\delta$  7.95 (d,  $J = 7.5$  Hz, 1H), 7.73 (t,  $J = 7.5$  Hz, 1H), 7.60 (t,  $J = 7.0$  Hz, 1H), 7.54 (d,  $J = 7.5$  Hz, 1H), 5.66 (dt,  $J = 18.5, 4.5$  Hz, 1H), 4.88-4.64 (m, 2H).

<sup>13</sup>C-NMR (125 MHz, CDCl<sub>3</sub>)

δ 169.7, 145.1 (d, *J* = 4.5 Hz), 134.3, 130.0, 126.5, 126.1, 122.3, 82.4 (d, *J* = 179.0 Hz),  
78.7 (d, *J* = 20.5 Hz).

<sup>19</sup>F-NMR (470 MHz, CDCl<sub>3</sub>)

δ -229.0 (dt, *J* = 46.0, 18.0 Hz).

HRMS (ESI+)

Calculated for C<sub>9</sub>H<sub>7</sub>FO<sub>2</sub> (M+H)<sup>+</sup>: 167.0503

Found: 167.0503

IR (thin film, cm<sup>-1</sup>)

2958, 1762, 1467, 1349, 1287, 1210, 1079, 1066, 1032, 982, 921, 743, 717, 696, 626

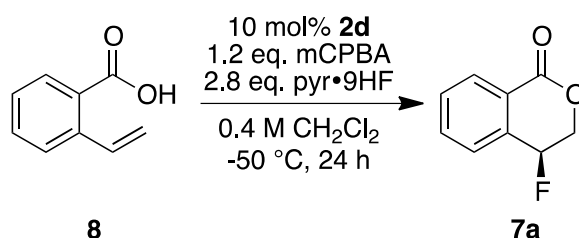

**4-fluoroisochroman-1-one 7a.** To a 7 mL low-density polyethylene vial with snap cap charged with a Teflon PTFE coated stir bar was added mCPBA (77%, 269 mg, 1.2 mmol, 1.2 eq.). The reaction vial was cooled in a dry ice/acetone bath to <-60 °C. To the cooled vial was added aryl iodide catalyst **2d** (56.0 mg, 0.10 mmol, 10 mol%) as a solution in CH<sub>2</sub>Cl<sub>2</sub> (1.5 mL) followed by pyr·9HF (70% HF, 0.65 mL, 25 mmol HF, 25 eq. HF). Vinylbenzoic acid **8** (148.0 mg, 1.0 mmol, 1.0 eq.) was added as a solution in CH<sub>2</sub>Cl<sub>2</sub> (1.0 mL, 0.40 M total concentration). The tube was capped and transferred to a -50 °C cryocool with vigorous stirring (vigorous stirring of the heterogeneous mixture is important to ensure reproducible conversion) at -50 °C for 24 h. After this time, the crude reaction suspension was quenched by being added to a cooled (-78 °C) suspension of basic alumina (2.5 g) in CH<sub>2</sub>Cl<sub>2</sub> (5.0 mL). The resulting suspension was warmed to 23 °C and stirred at this temperature for 10 min. The suspension was filtered through a plug of basic alumina, eluting with CH<sub>2</sub>Cl<sub>2</sub>. The solution was concentrated under reduced pressure. The resulting residue was dry loaded onto celite and purified by column chromatography on silica gel (hexanes:EtOAc 100:0 → 80:20) to afford fluorolactone **7a** as a clear, colorless oil (88 mg, 53%).

69% *ee*, Chiral GC (β-Cyclosil, 60 °C to 180 °C, 10 psi); *t<sub>R</sub>*(major) = 29.5 min, *t<sub>R</sub>*(minor) = 29.7 min.

Enriched sample:

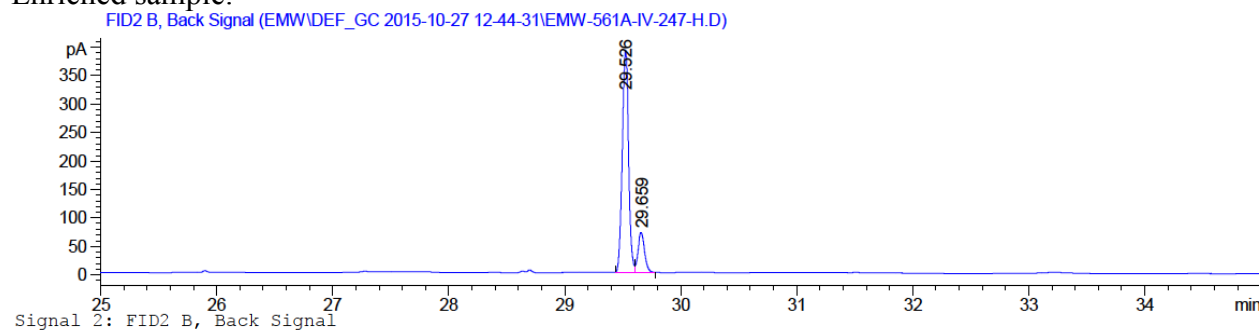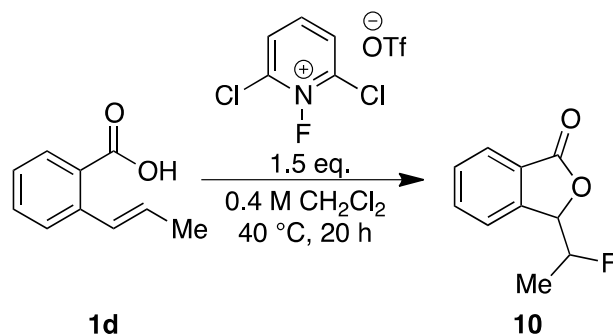

**3-(1-fluoroethyl)isobenzofuran-1(3H)-one 10.** To a 1.5 mL glass vial charged with a Teflon PTFE coated stir bar was added (*E*)-2-(prop-1-en-1-yl)benzoic acid **1d** (25 mg, 0.15 mmol, 1.0 eq.) and 2,6-dichloro-1-fluoropyridinium triflate (73 mg, 0.23 mmol, 1.5 eq.). The reaction vial was capped and placed under a nitrogen atmosphere. The vial was charged with CH<sub>2</sub>Cl<sub>2</sub> (0.4 mL) and sealed under nitrogen. The vial was placed in a 40 °C heating block with stirring for 20 h. After this time, the crude reaction was dry loaded onto celite and purified by column chromatography on silica gel (hexanes:EtOAc 100:0 → 60:40) to afford fluorolactone **10** as a 1.5:1 mixture of diastereomers as a white solid (25 mg, 93% yield).

<sup>1</sup>H-NMR (500 MHz, CDCl<sub>3</sub>, 1.5:1 mixture of diastereomers, minor diastereomer marked with \*)  
 δ 7.90 (d, *J* = 8.0 Hz, 2H), 7.74-7.66 (m, 2H), 7.60-7.52 (m, 3H), 5.51\* (dd, *J* = 16.0, 3.5 Hz, 1H), 5.42 (dd, *J* = 10.0, 6.0 Hz, 1H), 5.17-5.02\* (m, 1H), 4.75 (dp, *J* = 47.0, 6.0 Hz, 1H), 1.46 (dd, *J* = 23.5, 6.0 Hz, 3H), 1.37\* (dd, *J* = 23.5, 6.0 Hz, 3H).

<sup>13</sup>C-NMR (125 MHz, CDCl<sub>3</sub>, mixture of diastereomers)  
 δ 169.9, 169.8, 150.6, 146.2, 145.6, 140.7, 134.3, 134.2, 129.8, 129.7, 125.9, 125.8, 123.2, 123.1, 89.9 (d, *J* = 173.0 Hz), 88.3 (d, *J* = 173.0 Hz), 81.3 (d, *J* = 28.0 Hz), 80.8 (d, *J* = 25.5 Hz), 16.7 (d, *J* = 22.0 Hz), 15.9 (d, *J* = 22.0 Hz).

$^{19}\text{F}$ -NMR (470 MHz,  $\text{CDCl}_3$ , 1.5:1 mixture of diastereomers, minor diastereomer marked with \*)  
 $\delta$  -182.8 (m), -188.1\* (m)

HRMS (ESI+)

Calculated for  $\text{C}_{10}\text{H}_9\text{FO}_2$  (M+H) $^+$ : 181.0659  
 Found: 181.0660

IR (thin film,  $\text{cm}^{-1}$ )

3082, 2991, 2939, 1767, 1566, 1557, 1414, 1284, 1163, 1137, 1057, 984, 791, 743

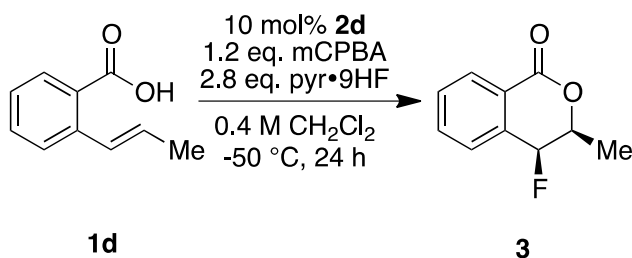

**4-fluoro-3-methylisochroman-1-one 3.** To a 7 mL low-density polyethylene vial with snap cap charged with a Teflon PTFE coated stir bar was added mCPBA (77%, 269 mg, 1.2 mmol, 1.2 eq.). The reaction vial was cooled in a dry ice/acetone bath to  $<-60$   $^\circ\text{C}$ . To the cooled vial was added aryl iodide catalyst **2d** (56.0 mg, 0.10 mmol, 10 mol%) as a solution in  $\text{CH}_2\text{Cl}_2$  (1.5 mL) followed by pyr $\cdot$ 9HF (70% HF, 0.65 mL, 25 mmol HF, 25 eq. HF). (*E*)-2-(prop-1-en-1-yl)benzoic acid **1d** (162.0 mg, 1.0 mmol, 1.0 eq.) was added as a solution in  $\text{CH}_2\text{Cl}_2$  (1.0 mL, 0.40 M total concentration). The tube was capped and transferred to a  $-50$   $^\circ\text{C}$  cryocool with vigorous stirring (vigorous stirring of the heterogeneous mixture is important to ensure reproducible conversion) at  $-50$   $^\circ\text{C}$  for 24 h. After this time, the crude reaction suspension was quenched by being added to a cooled ( $-78$   $^\circ\text{C}$ ) suspension of basic alumina (2.5 g) in  $\text{CH}_2\text{Cl}_2$  (5.0 mL). The resulting suspension was warmed to  $23$   $^\circ\text{C}$  and stirred at this temperature for 10 min. The suspension was filtered through a plug of basic alumina, eluting with  $\text{CH}_2\text{Cl}_2$ . The solution was concentrated under reduced pressure. The resulting residue was dry loaded onto celite and purified by column chromatography on silica gel (hexanes:EtOAc 100:0  $\rightarrow$  80:20) to afford fluorolactone **3** as a white solid (126 mg, 70% yield).

86% *ee*, Chiral HPLC (CHIRALPAK OD-H, 5% isopropanol in hexanes, 1.0 mL/min,  $\lambda$  = 230 nm);  $t_{\text{R}}$ (major) = 16.8 min,  $t_{\text{R}}$ (minor) = 22.0 min.

Racemic sample:

DAD1 C, Sig=230,4 Ref=450,100 (CRKDEF\_LC 2015-10-27 10-16-59\EMW-561A-IV-247-ME-RAC.D)

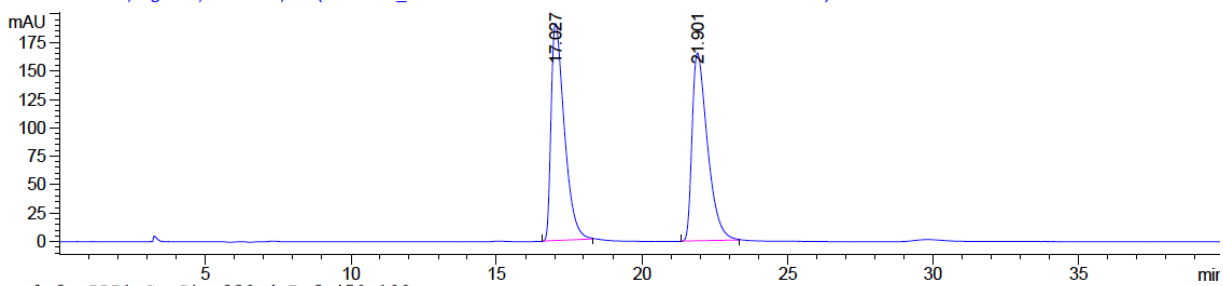

Signal 3: DAD1 C, Sig=230,4 Ref=450,100

| Peak # | RetTime [min] | Type | Width [min] | Area [mAU*s] | Height [mAU] | Area %  |
|--------|---------------|------|-------------|--------------|--------------|---------|
| 1      | 17.027        | BB   | 0.4806      | 6070.55518   | 191.08333    | 49.9695 |
| 2      | 21.901        | BB   | 0.5591      | 6077.95752   | 165.23271    | 50.0305 |

Totals : 1.21485e4 356.31604

Enriched sample:

DAD1 C, Sig=230,4 Ref=450,100 (CRKDEF\_LC 2015-10-27 10-16-59\EMW-561A-IV-247-ME.D)

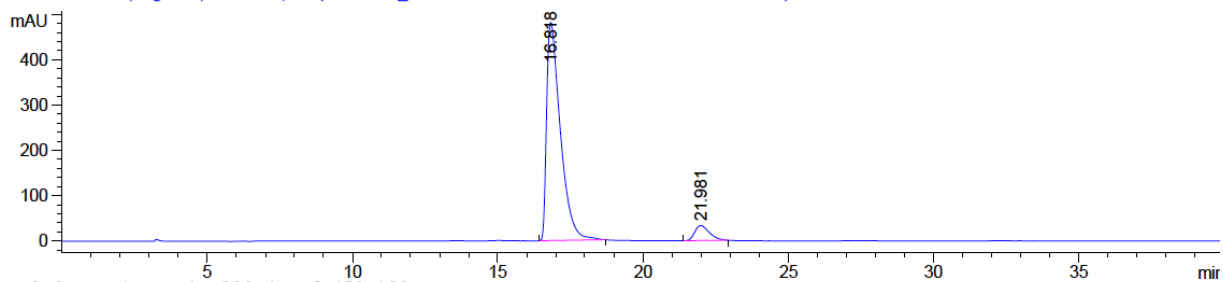

Signal 3: DAD1 C, Sig=230,4 Ref=450,100

| Peak # | RetTime [min] | Type | Width [min] | Area [mAU*s] | Height [mAU] | Area %  |
|--------|---------------|------|-------------|--------------|--------------|---------|
| 1      | 16.818        | BB   | 0.4946      | 1.58794e4    | 481.67459    | 93.0478 |
| 2      | 21.981        | BB   | 0.5369      | 1186.45020   | 33.36228     | 6.9522  |

Totals : 1.70659e4 515.03687

**VIII. Additional substrates**

The following substrates gave the fluorolactones as an inseparable mixture of diastereomers (2:1 syn:anti).

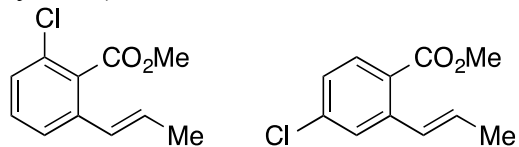

The following substrates provided the fluorolactone product in <10% yield.

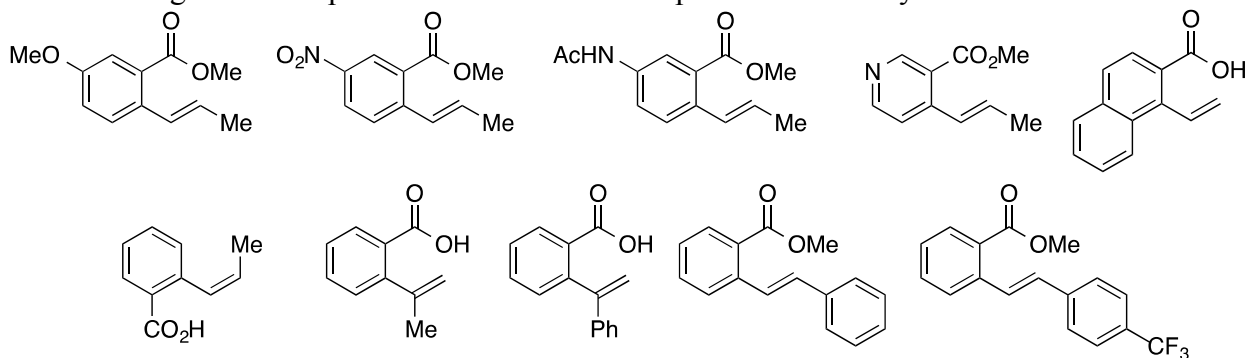**IX. X-ray crystallographic data**

X-ray quality crystals of **3** were grown by slow diffusion of pentane into a dissolved solution of the fluorolactone in diethyl ether.

**X-Ray Crystallography:** Data for a crystal mounted on a diffractometer was collected at 100 K. The intensities of the reflections were collected by means of a Bruker APEX II DUO CCD diffractometer (Cu $K\alpha$  radiation,  $\lambda=1.54178$  Å), and equipped with an Oxford Cryosystems nitrogen flow apparatus. The collection method involved 1.0° scans in  $\omega$  at -30°, -55°, -80°, 30°, 55°, 80° and 115° in  $2\theta$ . Data integration down to 0.84 Å resolution was carried out using SAINT V8.34 C (Bruker diffractometer, 2014) with reflection spot size optimisation. Absorption corrections were made with the program SADABS (Bruker diffractometer, 2014). The structure was solved by the Intrinsic Phasing methods and refined by least-squares methods against  $F^2$  using SHELXT-2014 (Sheldrick, 2015) and SHELXL-2014 (Sheldrick, 2015) with OLEX 2 interface (Dolomanov, et al., 2009). Non-hydrogen atoms were refined anisotropically, and hydrogen atoms were allowed to ride on the respective atoms. Crystal data as well as details of data collection and refinement are summarized in Table S1 and geometric parameters are shown in Table S2. The Ortep plots produced with SHELXL-2014 program, and the other drawings were produced with Accelrys DS Visualizer 2.0 (Accelrys, 2007).

**Table S1. Experimental details**

|                                                                            |                                                            |
|----------------------------------------------------------------------------|------------------------------------------------------------|
| Crystal data                                                               |                                                            |
| Chemical formula                                                           | C <sub>10</sub> H <sub>9</sub> FO <sub>2</sub>             |
| $M_r$                                                                      | 180.17                                                     |
| Crystal system, space group                                                | Orthorhombic, $P2_12_12_1$                                 |
| Temperature (K)                                                            | 100                                                        |
| $a, b, c$ (Å)                                                              | 4.4860 (2), 6.8678 (3), 27.2439 (11)                       |
| $V$ (Å <sup>3</sup> )                                                      | 839.36 (6)                                                 |
| $Z$                                                                        | 4                                                          |
| Radiation type                                                             | Cu $K\alpha$                                               |
| $\mu$ (mm <sup>-1</sup> )                                                  | 0.96                                                       |
| Crystal size (mm)                                                          | 0.20 × 0.04 × 0.02                                         |
| Data collection                                                            |                                                            |
| Diffractometer                                                             | Bruker D8 goniometer with CCD area detector diffractometer |
| Absorption correction                                                      | Multi-scan<br><i>SADABS</i>                                |
| $T_{\min}, T_{\max}$                                                       | 0.771, 0.864                                               |
| No. of measured, independent and observed [ $I > 2\sigma(I)$ ] reflections | 18807, 1483, 1431                                          |



|                                                                            |                                                                                                                                   |
|----------------------------------------------------------------------------|-----------------------------------------------------------------------------------------------------------------------------------|
| $R_{\text{int}}$                                                           | 0.038                                                                                                                             |
| $(\sin \theta/\lambda)_{\text{max}}$ ( $\text{\AA}^{-1}$ )                 | 0.595                                                                                                                             |
| Refinement                                                                 |                                                                                                                                   |
| $R[F^2 > 2\sigma(F^2)], wR(F^2), S$                                        | 0.025, 0.065, 1.08                                                                                                                |
| No. of reflections                                                         | 1483                                                                                                                              |
| No. of parameters                                                          | 119                                                                                                                               |
| H-atom treatment                                                           | H-atom parameters constrained                                                                                                     |
| $\Delta\rho_{\text{max}}, \Delta\rho_{\text{min}}$ ( $\text{e \AA}^{-3}$ ) | 0.11, -0.20                                                                                                                       |
| Absolute structure                                                         | Flack x determined using 532 quotients $[(I^+)-(I^-)]/[(I^+)+(I^-)]$ (Parsons, Flack and Wagner, Acta Cryst. B69 (2013) 249-259). |
| Absolute structure parameter                                               | -0.03 (4)                                                                                                                         |

Computer programs: *APEX2* v2014.3.0 (Bruker-AXS, 2014), *SAINT* 8.34C (Bruker-AXS, 2014), *SHELXT-2014* (Sheldrick, 2015), *SHELXL2014* (Sheldrick, 2015), Bruker *SHELXTL* (Sheldrick, 2015).

**Table S2. Geometric parameters ( $\text{\AA}$ ,  $^\circ$ )**

|          |             |           |             |
|----------|-------------|-----------|-------------|
| C1—O2    | 1.208 (2)   | C6—H6     | 0.9500      |
| C1—O1    | 1.360 (2)   | C7—C8     | 1.500 (2)   |
| C1—C2    | 1.482 (2)   | C8—F1     | 1.419 (2)   |
| C2—C3    | 1.397 (2)   | C8—C9     | 1.511 (2)   |
| C2—C7    | 1.398 (2)   | C8—H8     | 1.0000      |
| C3—C4    | 1.382 (3)   | C9—O1     | 1.4540 (19) |
| C3—H3    | 0.9500      | C9—C10    | 1.515 (2)   |
| C4—C5    | 1.390 (3)   | C9—H9     | 1.0000      |
| C4—H4    | 0.9500      | C10—H10A  | 0.9800      |
| C5—C6    | 1.388 (2)   | C10—H10B  | 0.9800      |
| C5—H5    | 0.9500      | C10—H10C  | 0.9800      |
| C6—C7    | 1.389 (2)   |           |             |
| O2—C1—O1 | 117.72 (15) | C2—C7—C8  | 118.61 (15) |
| O2—C1—C2 | 124.39 (15) | F1—C8—C7  | 108.60 (14) |
| O1—C1—C2 | 117.80 (14) | F1—C8—C9  | 109.36 (13) |
| C3—C2—C7 | 120.38 (16) | C7—C8—C9  | 111.25 (13) |
| C3—C2—C1 | 118.77 (15) | F1—C8—H8  | 109.2       |
| C7—C2—C1 | 120.82 (15) | C7—C8—H8  | 109.2       |
| C4—C3—C2 | 119.45 (16) | C9—C8—H8  | 109.2       |
| C4—C3—H3 | 120.3       | O1—C9—C8  | 111.17 (13) |
| C2—C3—H3 | 120.3       | O1—C9—C10 | 105.78 (13) |
| C3—C4—C5 | 120.46 (16) | C8—C9—C10 | 114.40 (14) |

|             |              |               |              |
|-------------|--------------|---------------|--------------|
| C3—C4—H4    | 119.8        | O1—C9—H9      | 108.4        |
| C5—C4—H4    | 119.8        | C8—C9—H9      | 108.4        |
| C6—C5—C4    | 120.05 (16)  | C10—C9—H9     | 108.4        |
| C6—C5—H5    | 120.0        | C9—C10—H10A   | 109.5        |
| C4—C5—H5    | 120.0        | C9—C10—H10B   | 109.5        |
| C5—C6—C7    | 120.24 (16)  | H10A—C10—H10B | 109.5        |
| C5—C6—H6    | 119.9        | C9—C10—H10C   | 109.5        |
| C7—C6—H6    | 119.9        | H10A—C10—H10C | 109.5        |
| C6—C7—C2    | 119.41 (15)  | H10B—C10—H10C | 109.5        |
| C6—C7—C8    | 121.97 (15)  | C1—O1—C9      | 119.52 (13)  |
| O2—C1—C2—C3 | 8.5 (3)      | C1—C2—C7—C8   | -0.6 (2)     |
| O1—C1—C2—C3 | -174.91 (15) | C6—C7—C8—F1   | -87.16 (19)  |
| O2—C1—C2—C7 | -169.40 (17) | C2—C7—C8—F1   | 92.15 (17)   |
| O1—C1—C2—C7 | 7.2 (2)      | C6—C7—C8—C9   | 152.44 (16)  |
| C7—C2—C3—C4 | -0.5 (3)     | C2—C7—C8—C9   | -28.3 (2)    |
| C1—C2—C3—C4 | -178.43 (15) | F1—C8—C9—O1   | -69.37 (16)  |
| C2—C3—C4—C5 | -0.3 (3)     | C7—C8—C9—O1   | 50.59 (19)   |
| C3—C4—C5—C6 | 0.9 (3)      | F1—C8—C9—C10  | 50.36 (19)   |
| C4—C5—C6—C7 | -0.6 (3)     | C7—C8—C9—C10  | 170.32 (14)  |
| C5—C6—C7—C2 | -0.3 (3)     | O2—C1—O1—C9   | -164.91 (15) |
| C5—C6—C7—C8 | 179.03 (16)  | C2—C1—O1—C9   | 18.2 (2)     |
| C3—C2—C7—C6 | 0.8 (3)      | C8—C9—O1—C1   | -47.65 (19)  |
| C1—C2—C7—C6 | 178.68 (15)  | C10—C9—O1—C1  | -172.38 (14) |
| C3—C2—C7—C8 | -178.49 (15) |               |              |

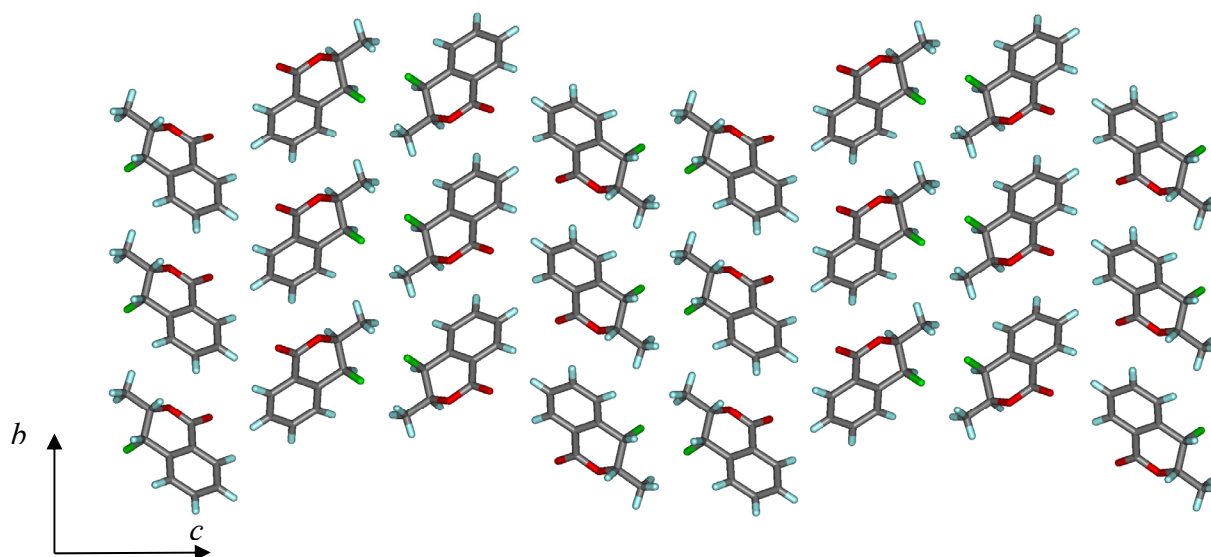

Three-dimensional supramolecular architecture viewed along the *a*-axis direction.

X-ray quality crystals of **7c** were grown by slow evaporation from a saturated solution of the lactone in diethyl ether.

**X-Ray Crystallography:** Data for a crystal mounted on a diffractometer was collected at 100 K. The intensities of the reflections were collected by means of a Bruker APEX II DUO CCD diffractometer (Cu<sub>Kα</sub> radiation,  $\lambda=1.54178$  Å), and equipped with an Oxford Cryosystems nitrogen flow apparatus. The collection method involved 1.0° scans in  $\omega$  at -30°, -55°, -80°, 30°, 55°, 80° and 115° in  $2\theta$ . Data integration down to 0.84 Å resolution was carried out using SAINT V8.34 C (Bruker diffractometer, 2014) with reflection spot size optimisation. Absorption corrections were made with the program SADABS (Bruker diffractometer, 2014). The structure was solved by the Intrinsic Phasing methods and refined by least-squares methods against  $F^2$  using SHELXT-2014 (Sheldrick, 2015) and SHELXL-2014 (Sheldrick, 2015) with OLEX 2 interface (Dolomanov, et al., 2009). Non-hydrogen atoms were refined anisotropically, and hydrogen atoms were allowed to ride on the respective atoms. Crystal data as well as details of data collection and refinement are summarized in Table S3 and geometric parameters are shown in Table S4. The Ortep plots produced with SHELXL-2014 program, and the other drawings were produced with Accelrys DS Visualizer 2.0 (Accelrys, 2007).

**Table S3. Experimental details**

|                                  |                                                            |
|----------------------------------|------------------------------------------------------------|
| Crystal data                     |                                                            |
| Chemical formula                 | C <sub>12</sub> H <sub>12</sub> ClFO <sub>2</sub>          |
| $M_r$                            | 242.67                                                     |
| Crystal system, space group      | Mon <sup>o</sup> Clinic, C2                                |
| Temperature (K)                  | 100                                                        |
| $a, b, c$ (Å)                    | 21.6152 (6), 4.3127 (1), 14.1504 (4)                       |
| $\beta$ (°)                      | 123.3915 (9)                                               |
| $V$ (Å <sup>3</sup> )            | 1101.35 (5)                                                |
| $Z$                              | 4                                                          |
| Radiation type                   | Cu $K\alpha$                                               |
| $\mu$ (mm <sup>-1</sup> )        | 3.06                                                       |
| Crystal size (mm)                | 0.26 × 0.14 × 0.12                                         |
| Data collection                  |                                                            |
| Diffractometer                   | Bruker D8 goniometer with CCD area detector diffractometer |
| Absorption correction            | Multi-scan<br><i>SADABS</i>                                |
| $T_{\min}, T_{\max}$             | 0.681, 0.806                                               |
| No. of measured, independent and | 12210, 1747, 1734                                          |

|                                                                               |                                                                                                                                     |
|-------------------------------------------------------------------------------|-------------------------------------------------------------------------------------------------------------------------------------|
| observed [ $I > 2\sigma(I)$ ] reflections                                     |                                                                                                                                     |
| $R_{\text{int}}$                                                              | 0.027                                                                                                                               |
| $(\sin \theta/\lambda)_{\text{max}}$ ( $\text{\AA}^{-1}$ )                    | 0.596                                                                                                                               |
| Refinement                                                                    |                                                                                                                                     |
| $R[F^2 > 2\sigma(F^2)]$ , $wR(F^2)$ , $S$                                     | 0.022, 0.059, 1.08                                                                                                                  |
| No. of reflections                                                            | 1747                                                                                                                                |
| No. of parameters                                                             | 145                                                                                                                                 |
| No. of restraints                                                             | 1                                                                                                                                   |
| H-atom treatment                                                              | H-atom parameters constrained                                                                                                       |
| $\Delta\rho_{\text{max}}$ , $\Delta\rho_{\text{min}}$ ( $\text{e \AA}^{-3}$ ) | 0.17, -0.21                                                                                                                         |
| Absolute structure                                                            | Flack $x$ determined using 648 quotients $[(I^+)-(I^-)]/[(I^+)+(I^-)]$ (Parsons, Flack and Wagner, Acta Cryst. B69 (2013) 249-259). |
| Flack ( $x$ ) parameter                                                       | -0.004 (12)                                                                                                                         |
| Hooft parameter                                                               | 0.011(6)                                                                                                                            |

Computer programs: *APEX2* v2014.3.0 (Bruker-AXS, 2014), *SAINT* 8.34C (Bruker-AXS, 2014), *SHELXT-2014* (Sheldrick, 2015), *SHELXL2014* (Sheldrick, 2015), Bruker *SHELXTL* (Sheldrick, 2015).

**Table S4. Geometric parameters ( $\text{\AA}$ ,  $^\circ$ )**

|          |             |           |             |
|----------|-------------|-----------|-------------|
| C1—O2    | 1.209 (3)   | C8—C9     | 1.509 (3)   |
| C1—O1    | 1.358 (2)   | C8—H8     | 1.0000      |
| C1—C2    | 1.482 (3)   | C9—O1     | 1.458 (3)   |
| C2—C3    | 1.394 (3)   | C9—C10    | 1.517 (3)   |
| C2—C7    | 1.396 (3)   | C9—H9     | 1.0000      |
| C3—C4    | 1.382 (3)   | C10—C11   | 1.528 (3)   |
| C3—H3    | 0.9500      | C10—H10A  | 0.9900      |
| C4—C5    | 1.388 (3)   | C10—H10B  | 0.9900      |
| C4—H4    | 0.9500      | C11—C12   | 1.516 (3)   |
| C5—C6    | 1.390 (3)   | C11—H11A  | 0.9900      |
| C5—H5    | 0.9500      | C11—H11B  | 0.9900      |
| C6—C7    | 1.385 (3)   | C12—C11   | 1.810 (2)   |
| C6—H6    | 0.9500      | C12—H12A  | 0.9900      |
| C7—C8    | 1.497 (3)   | C12—H12B  | 0.9900      |
| C8—F1    | 1.422 (3)   |           |             |
| O2—C1—O1 | 117.85 (19) | C9—C8—H8  | 109.6       |
| O2—C1—C2 | 124.35 (18) | O1—C9—C8  | 110.67 (17) |
| O1—C1—C2 | 117.77 (19) | O1—C9—C10 | 107.25 (17) |
| C3—C2—C7 | 119.7 (2)   | C8—C9—C10 | 113.68 (17) |
| C3—C2—C1 | 119.68 (19) | O1—C9—H9  | 108.4       |

|             |             |                 |              |
|-------------|-------------|-----------------|--------------|
| C7—C2—C1    | 120.62 (18) | C8—C9—H9        | 108.4        |
| C4—C3—C2    | 119.9 (2)   | C10—C9—H9       | 108.4        |
| C4—C3—H3    | 120.1       | C9—C10—C11      | 112.78 (17)  |
| C2—C3—H3    | 120.1       | C9—C10—H10A     | 109.0        |
| C3—C4—C5    | 120.34 (19) | C11—C10—H10A    | 109.0        |
| C3—C4—H4    | 119.8       | C9—C10—H10B     | 109.0        |
| C5—C4—H4    | 119.8       | C11—C10—H10B    | 109.0        |
| C4—C5—C6    | 120.1 (2)   | H10A—C10—H10B   | 107.8        |
| C4—C5—H5    | 120.0       | C12—C11—C10     | 113.28 (18)  |
| C6—C5—H5    | 120.0       | C12—C11—H11A    | 108.9        |
| C7—C6—C5    | 119.8 (2)   | C10—C11—H11A    | 108.9        |
| C7—C6—H6    | 120.1       | C12—C11—H11B    | 108.9        |
| C5—C6—H6    | 120.1       | C10—C11—H11B    | 108.9        |
| C6—C7—C2    | 120.17 (19) | H11A—C11—H11B   | 107.7        |
| C6—C7—C8    | 122.11 (19) | C11—C12—Cl1     | 111.88 (16)  |
| C2—C7—C8    | 117.71 (19) | C11—C12—H12A    | 109.2        |
| F1—C8—C7    | 108.69 (17) | Cl1—C12—H12A    | 109.2        |
| F1—C8—C9    | 108.46 (18) | C11—C12—H12B    | 109.2        |
| C7—C8—C9    | 110.93 (17) | Cl1—C12—H12B    | 109.2        |
| F1—C8—H8    | 109.6       | H12A—C12—H12B   | 107.9        |
| C7—C8—H8    | 109.6       | C1—O1—C9        | 120.29 (17)  |
| O2—C1—C2—C3 | 14.7 (4)    | C2—C7—C8—F1     | 86.3 (2)     |
| O1—C1—C2—C3 | -167.4 (2)  | C6—C7—C8—C9     | 147.2 (2)    |
| O2—C1—C2—C7 | -163.7 (2)  | C2—C7—C8—C9     | -32.9 (3)    |
| O1—C1—C2—C7 | 14.2 (3)    | F1—C8—C9—O1     | -66.2 (2)    |
| C7—C2—C3—C4 | -0.7 (3)    | C7—C8—C9—O1     | 53.1 (2)     |
| C1—C2—C3—C4 | -179.1 (2)  | F1—C8—C9—C10    | 54.6 (2)     |
| C2—C3—C4—C5 | 0.1 (4)     | C7—C8—C9—C10    | 173.92 (19)  |
| C3—C4—C5—C6 | 0.3 (4)     | O1—C9—C10—C11   | -71.4 (2)    |
| C4—C5—C6—C7 | -0.1 (4)    | C8—C9—C10—C11   | 166.0 (2)    |
| C5—C6—C7—C2 | -0.5 (4)    | C9—C10—C11—C12  | 178.7 (2)    |
| C5—C6—C7—C8 | 179.5 (2)   | C10—C11—C12—Cl1 | 56.7 (3)     |
| C3—C2—C7—C6 | 0.9 (3)     | O2—C1—O1—C9     | -172.7 (2)   |
| C1—C2—C7—C6 | 179.3 (2)   | C2—C1—O1—C9     | 9.2 (3)      |
| C3—C2—C7—C8 | -179.0 (2)  | C8—C9—O1—C1     | -43.0 (3)    |
| C1—C2—C7—C8 | -0.7 (3)    | C10—C9—O1—C1    | -167.49 (17) |
| C6—C7—C8—F1 | -93.7 (2)   |                 |              |

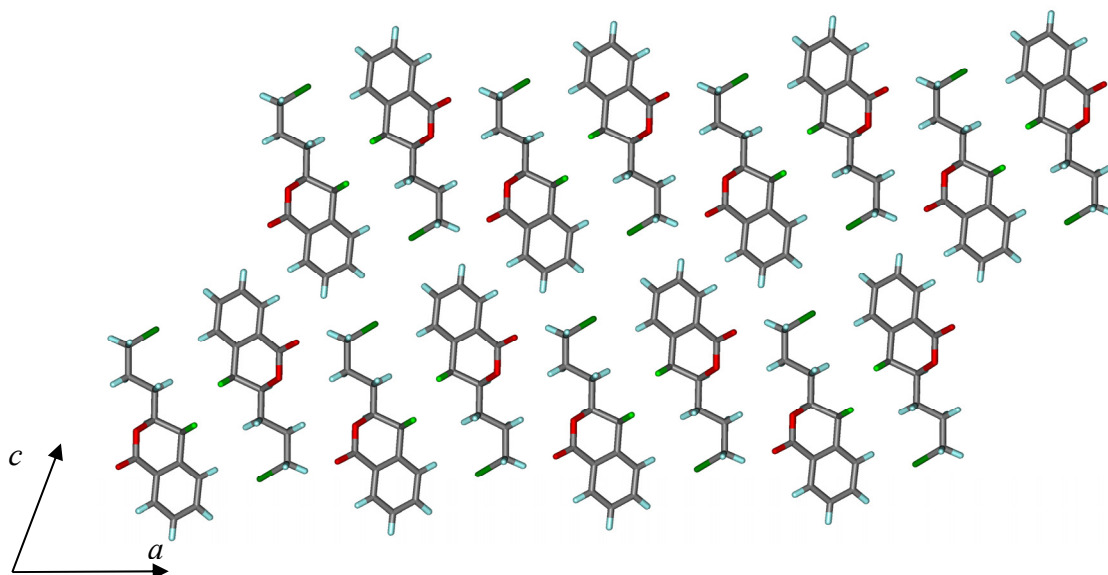

Three-dimensional supramolecular architecture viewed along the *b*-axis direction.

X-ray quality crystals of **7f** were grown by slow evaporation from a saturated solution of the lactone in diethyl ether.

**X-Ray Crystallography:** Data for a crystal mounted on a diffractometer was collected at 100 K. The intensities of the reflections were collected by means of a Bruker APEX II DUO CCD diffractometer ( $\text{CuK}\alpha$  radiation,  $\lambda=1.54178$  Å), and equipped with an Oxford Cryosystems nitrogen flow apparatus. The collection method involved  $1.0^\circ$  scans in  $\omega$  at  $-30^\circ$ ,  $-55^\circ$ ,  $-80^\circ$ ,  $30^\circ$ ,  $55^\circ$ ,  $80^\circ$  and  $115^\circ$  in  $2\theta$ . Data integration down to  $0.84$  Å resolution was carried out using SAINT V8.34 C (Bruker diffractometer, 2014) with reflection spot size optimization. Absorption corrections were made with the program SADABS (Bruker diffractometer, 2014). The structure was solved by the Intrinsic Phasing methods and refined by least-squares methods against  $F^2$  using SHELXT-2014 (Sheldrick, 2015) and SHELXL-2014 (Sheldrick, 2015) with OLEX 2 interface (Dolomanov, et al., 2009). Non-hydrogen atoms were refined anisotropically, and hydrogen atoms were allowed to ride on the respective atoms. Crystal data as well as details of data collection and refinement are summarized in Table S5 and geometric parameters are shown in Table S6. The Ortep plots produced with SHELXL-2014 program, and the other drawings were produced with Accelrys DS Visualizer 2.0 (Accelrys, 2007).

**Table S5. Experimental details**

|                             |                                         |
|-----------------------------|-----------------------------------------|
| Crystal data                |                                         |
| Chemical formula            | $\text{C}_{11}\text{H}_{11}\text{FO}_3$ |
| $M_r$                       | 210.20                                  |
| Crystal system, space group | Monoclinic, $P2_1$                      |
| Temperature (K)             | 100                                     |

|                                                                            |                                                                   |
|----------------------------------------------------------------------------|-------------------------------------------------------------------|
| $a, b, c$ (Å)                                                              | 4.5174 (2), 6.8284 (4), 15.9328 (8)                               |
| $\beta$ (°)                                                                | 92.4936 (17)                                                      |
| $V$ (Å <sup>3</sup> )                                                      | 491.01 (4)                                                        |
| $Z$                                                                        | 2                                                                 |
| Radiation type                                                             | Cu $K\alpha$                                                      |
| $\mu$ (mm <sup>-1</sup> )                                                  | 0.98                                                              |
| Crystal size (mm)                                                          | 0.18 × 0.10 × 0.08                                                |
| Data collection                                                            |                                                                   |
| Diffractometer                                                             | Bruker D8 goniometer with CCD area detector diffractometer        |
| Absorption correction                                                      | Multi-scan<br><i>SADABS</i>                                       |
| $T_{\min}, T_{\max}$                                                       | 0.765, 0.864                                                      |
| No. of measured, independent and observed [ $I > 2\sigma(I)$ ] reflections | 12027, 1628, 1588                                                 |
| $R_{\text{int}}$                                                           | 0.034                                                             |
| $(\sin \theta/\lambda)_{\text{max}}$ (Å <sup>-1</sup> )                    | 0.596                                                             |
| Refinement                                                                 |                                                                   |
| $R[F^2 > 2\sigma(F^2)], wR(F^2), S$                                        | 0.033, 0.086, 1.04                                                |
| No. of reflections                                                         | 1628                                                              |
| No. of parameters                                                          | 138                                                               |
| No. of restraints                                                          | 1                                                                 |
| H-atom treatment                                                           | H-atom parameters constrained                                     |
| $\Delta\rho_{\text{max}}, \Delta\rho_{\text{min}}$ (e Å <sup>-3</sup> )    | 0.19, -0.15                                                       |
| Absolute structure                                                         | Classical Flack method preferred over Parsons because s.u. lower. |
| Absolute structure parameter                                               | 0.0 (2)                                                           |

Computer programs: *APEX2* v2014.3.0 (Bruker-AXS, 2014), *SAINT* 8.34C (Bruker-AXS, 2014), *SHELXT-2014* (Sheldrick, 2015), *SHELXL2014* (Sheldrick, 2015), Bruker *SHELXTL* (Sheldrick, 2015).

**Table S6. Geometric parameters (Å, °)**

|       |           |        |           |
|-------|-----------|--------|-----------|
| C1—O2 | 1.205 (3) | C8—F1  | 1.419 (3) |
| C1—O1 | 1.358 (3) | C8—C9  | 1.505 (4) |
| C1—C2 | 1.481 (3) | C8—H8  | 1.0000    |
| C2—C3 | 1.394 (3) | C9—O1  | 1.449 (3) |
| C2—C7 | 1.398 (3) | C9—C10 | 1.514 (3) |
| C3—C4 | 1.389 (4) | C9—H9  | 1.0000    |

|             |             |               |              |
|-------------|-------------|---------------|--------------|
| C3—H3       | 0.9500      | C10—O3        | 1.413 (3)    |
| C4—C5       | 1.386 (4)   | C10—H10A      | 0.9900       |
| C4—H4       | 0.9500      | C10—H10B      | 0.9900       |
| C5—C6       | 1.387 (4)   | C11—O3        | 1.418 (3)    |
| C5—H5       | 0.9500      | C11—H11A      | 0.9800       |
| C6—C7       | 1.392 (4)   | C11—H11B      | 0.9800       |
| C6—H6       | 0.9500      | C11—H11C      | 0.9800       |
| C7—C8       | 1.501 (3)   |               |              |
| O2—C1—O1    | 117.9 (2)   | F1—C8—H8      | 109.4        |
| O2—C1—C2    | 124.3 (2)   | C7—C8—H8      | 109.4        |
| O1—C1—C2    | 117.77 (19) | C9—C8—H8      | 109.4        |
| C3—C2—C7    | 120.4 (2)   | O1—C9—C8      | 111.31 (19)  |
| C3—C2—C1    | 118.9 (2)   | O1—C9—C10     | 105.29 (19)  |
| C7—C2—C1    | 120.7 (2)   | C8—C9—C10     | 115.1 (2)    |
| C4—C3—C2    | 119.6 (2)   | O1—C9—H9      | 108.3        |
| C4—C3—H3    | 120.2       | C8—C9—H9      | 108.3        |
| C2—C3—H3    | 120.2       | C10—C9—H9     | 108.3        |
| C5—C4—C3    | 120.1 (2)   | O3—C10—C9     | 106.67 (19)  |
| C5—C4—H4    | 119.9       | O3—C10—H10A   | 110.4        |
| C3—C4—H4    | 119.9       | C9—C10—H10A   | 110.4        |
| C4—C5—C6    | 120.5 (2)   | O3—C10—H10B   | 110.4        |
| C4—C5—H5    | 119.8       | C9—C10—H10B   | 110.4        |
| C6—C5—H5    | 119.8       | H10A—C10—H10B | 108.6        |
| C5—C6—C7    | 120.0 (2)   | O3—C11—H11A   | 109.5        |
| C5—C6—H6    | 120.0       | O3—C11—H11B   | 109.5        |
| C7—C6—H6    | 120.0       | H11A—C11—H11B | 109.5        |
| C6—C7—C2    | 119.4 (2)   | O3—C11—H11C   | 109.5        |
| C6—C7—C8    | 122.2 (2)   | H11A—C11—H11C | 109.5        |
| C2—C7—C8    | 118.5 (2)   | H11B—C11—H11C | 109.5        |
| F1—C8—C7    | 108.66 (19) | C1—O1—C9      | 118.96 (18)  |
| F1—C8—C9    | 109.47 (19) | C10—O3—C11    | 111.86 (19)  |
| C7—C8—C9    | 110.56 (19) |               |              |
| O2—C1—C2—C3 | 9.2 (4)     | C6—C7—C8—F1   | -88.5 (3)    |
| O1—C1—C2—C3 | -173.6 (2)  | C2—C7—C8—F1   | 91.5 (2)     |
| O2—C1—C2—C7 | -168.6 (2)  | C6—C7—C8—C9   | 151.3 (2)    |
| O1—C1—C2—C7 | 8.6 (3)     | C2—C7—C8—C9   | -28.6 (3)    |
| C7—C2—C3—C4 | -0.9 (4)    | F1—C8—C9—O1   | -67.4 (2)    |
| C1—C2—C3—C4 | -178.7 (2)  | C7—C8—C9—O1   | 52.3 (3)     |
| C2—C3—C4—C5 | 0.2 (4)     | F1—C8—C9—C10  | 52.3 (2)     |
| C3—C4—C5—C6 | 0.7 (4)     | C7—C8—C9—C10  | 171.96 (19)  |
| C4—C5—C6—C7 | -0.9 (4)    | O1—C9—C10—O3  | -168.78 (19) |
| C5—C6—C7—C2 | 0.2 (4)     | C8—C9—C10—O3  | 68.3 (3)     |
| C5—C6—C7—C8 | -179.8 (2)  | O2—C1—O1—C9   | -164.8 (2)   |
| C3—C2—C7—C6 | 0.7 (4)     | C2—C1—O1—C9   | 17.8 (3)     |
| C1—C2—C7—C6 | 178.5 (2)   | C8—C9—O1—C1   | -49.0 (3)    |
| C3—C2—C7—C8 | -179.4 (2)  | C10—C9—O1—C1  | -174.34 (19) |



|             |          |               |           |
|-------------|----------|---------------|-----------|
| C1—C2—C7—C8 | -1.6 (3) | C9—C10—O3—C11 | 175.7 (2) |
|-------------|----------|---------------|-----------|

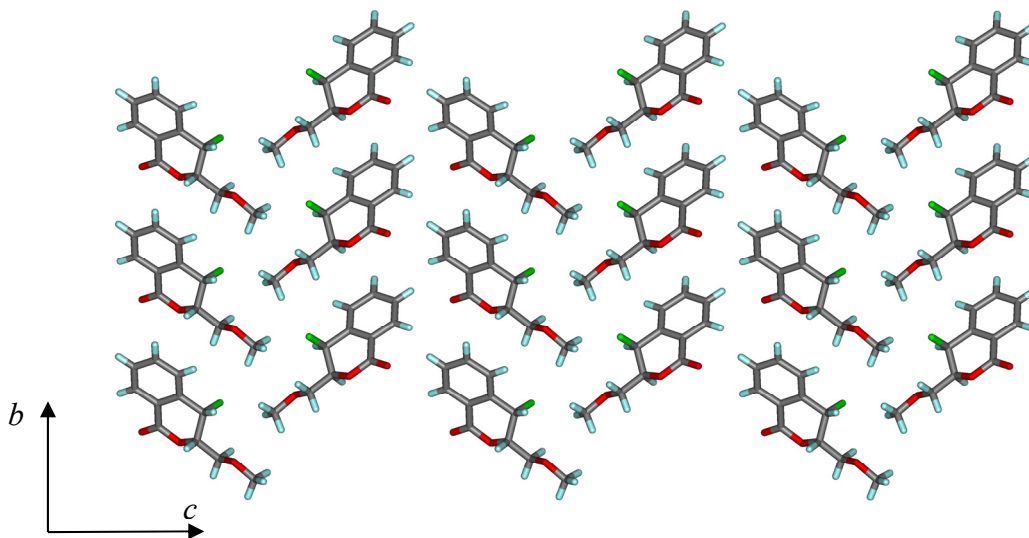

Three-dimensional supramolecular architecture viewed along the *a*-axis direction.

#### References for X-ray crystallography data:

- [1] Bruker AXS APEX II, Bruker AXS, Madison, Wisconsin, **2014**.
- [2] Accelrys DS Visualizer v2.0.1, Accelrys Software, Inc., **2007**.
- [3] G. M. Sheldrick, *Acta Cryst.* **2015**, *A71*, 3-8.
- [4] G. M. Sheldrick, *Acta Cryst.* **2015**, *C71*, 3-8.
- [5] O. V. Dolomanov, L. J. Bourhis, R. J. Gildea, J. A. K. Howard and H. Puschmann *J. Appl. Cryst.* **2009**, *42*, 339-341.

**X. NMR spectra**

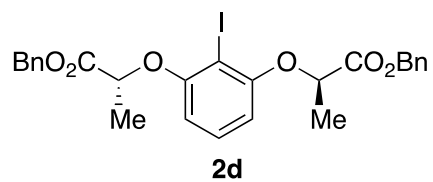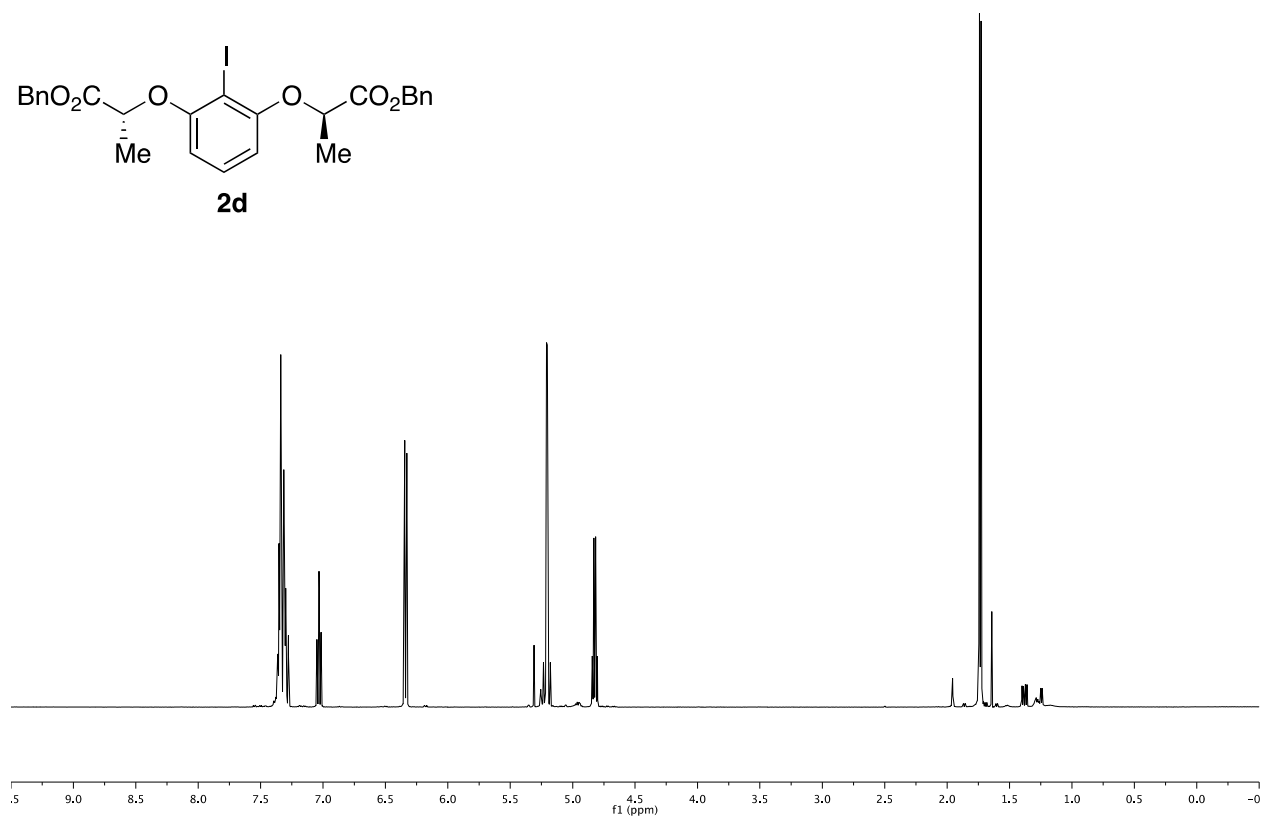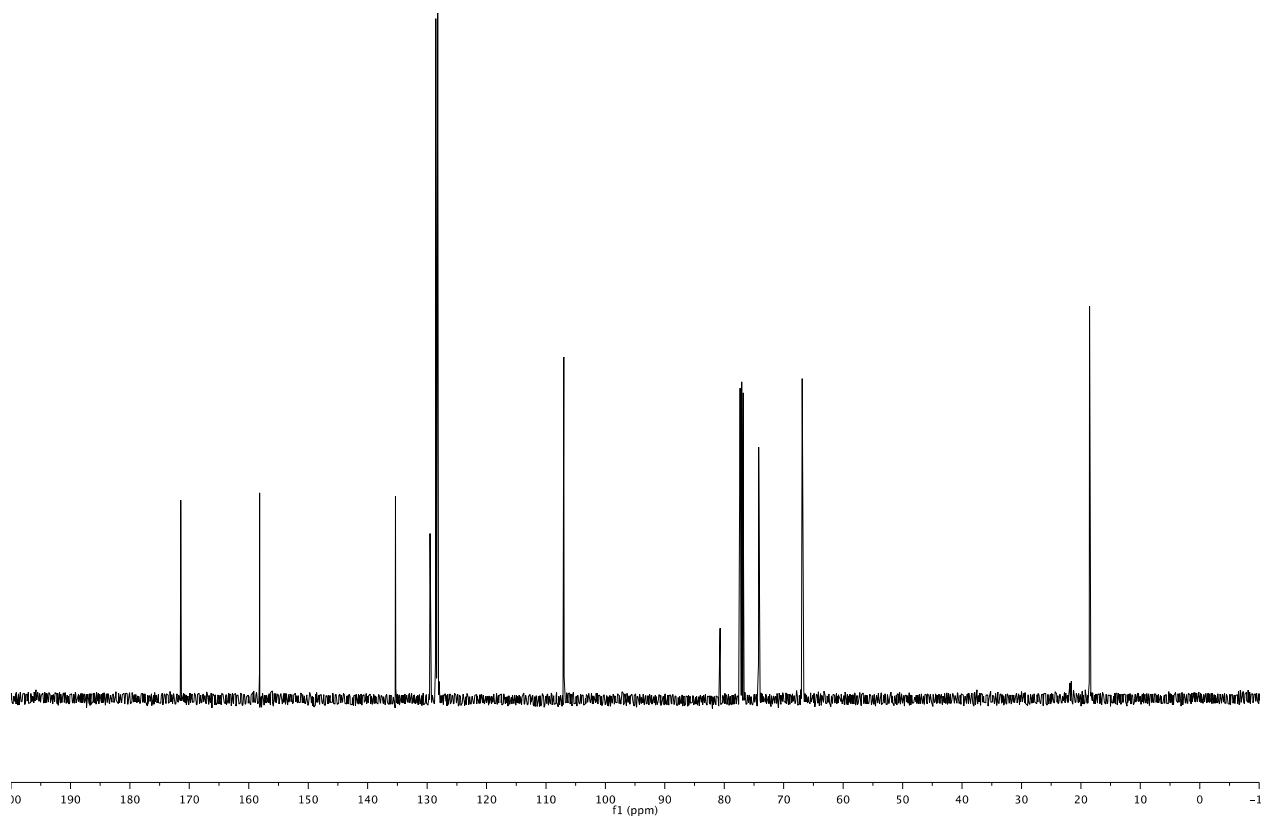

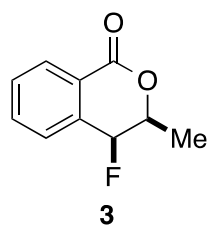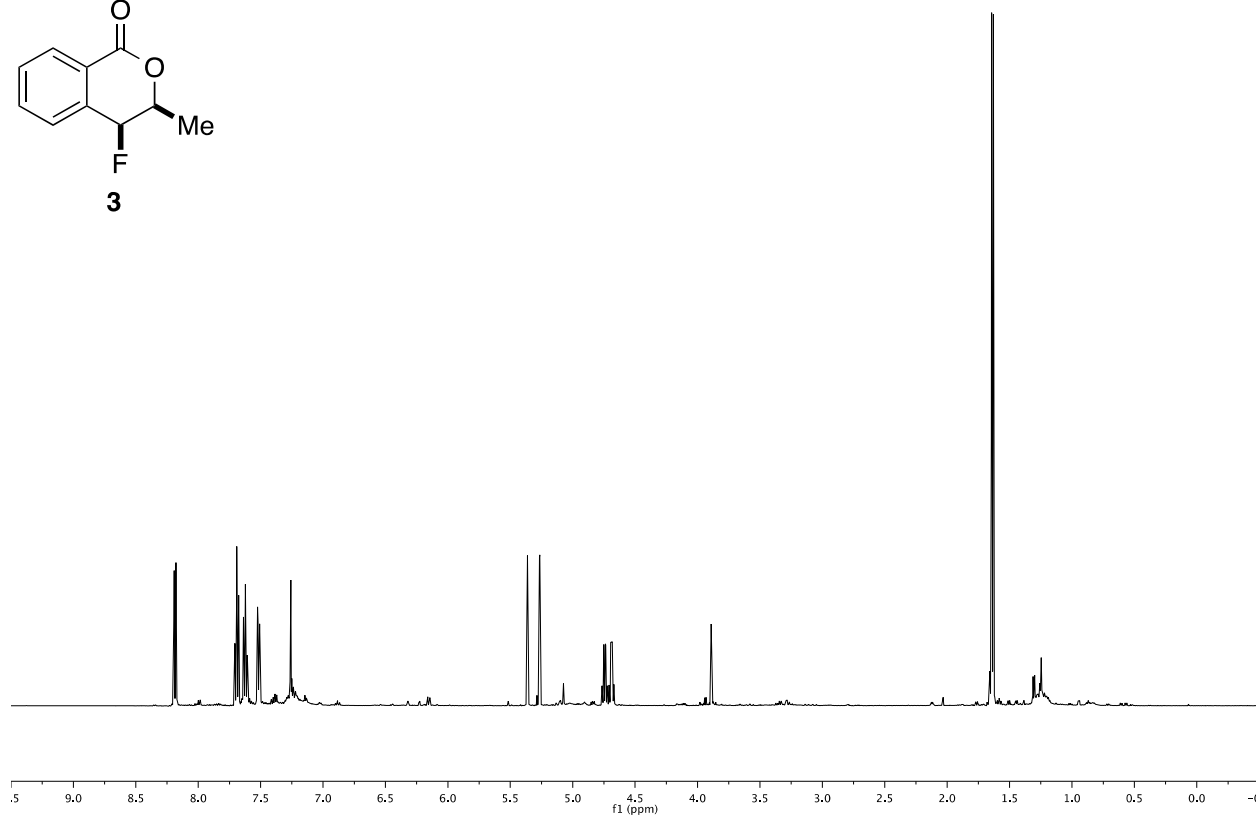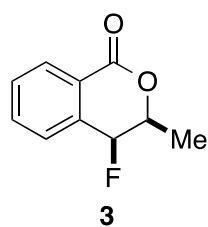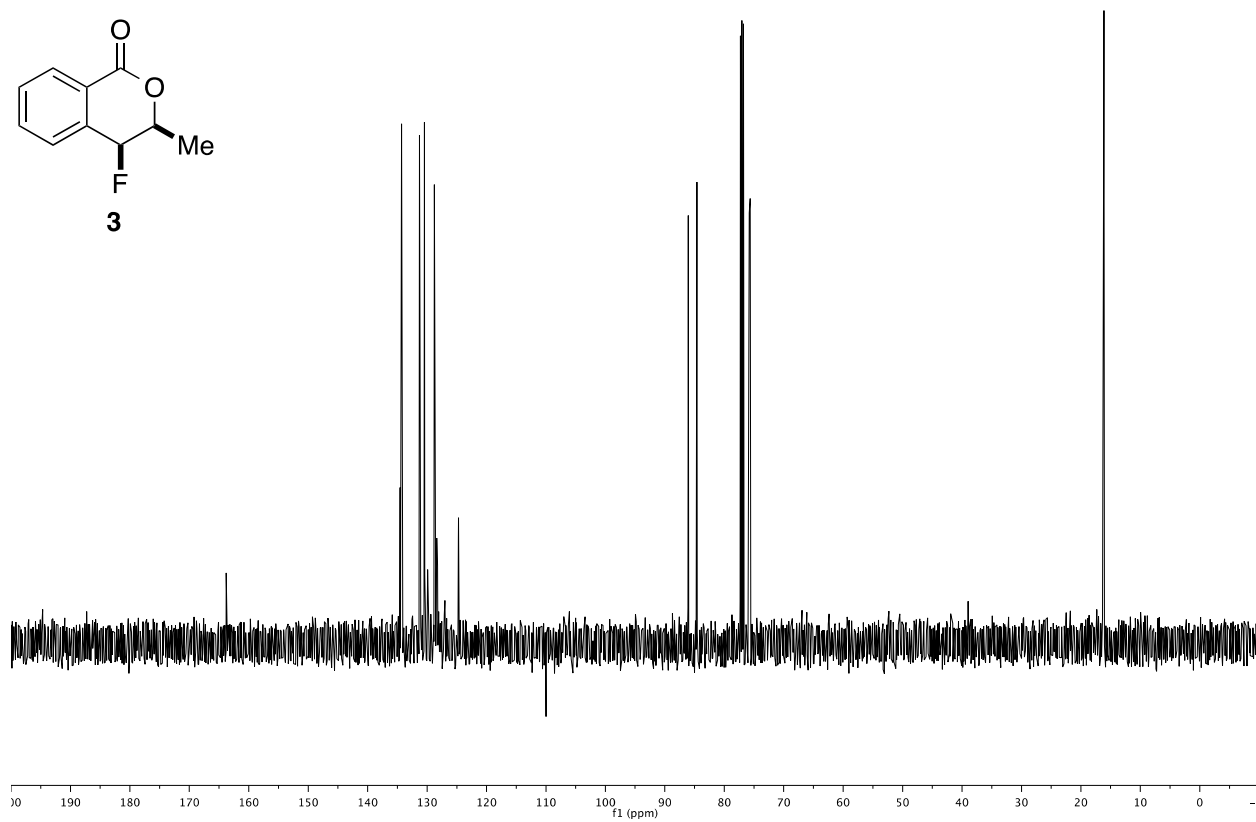

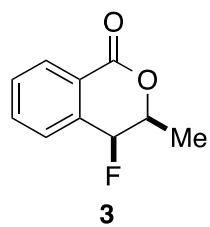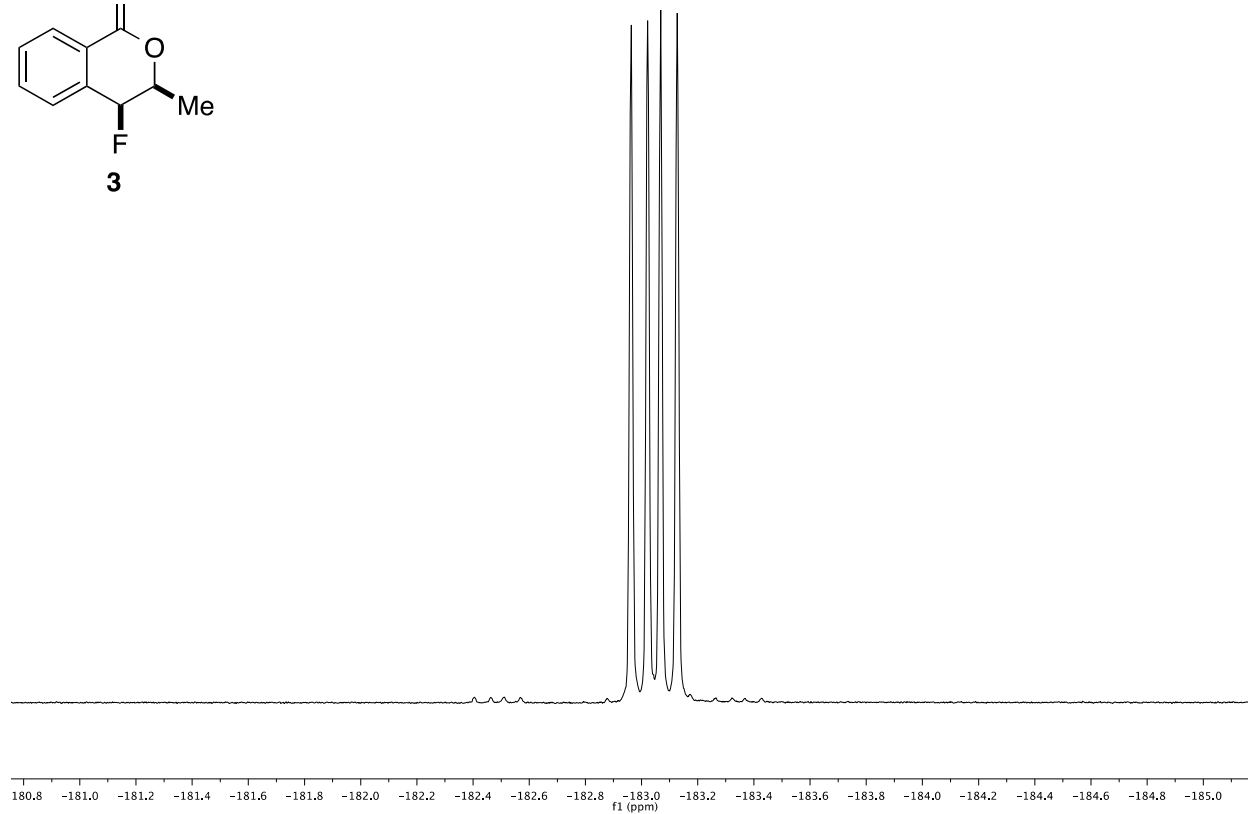

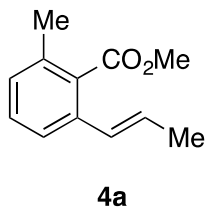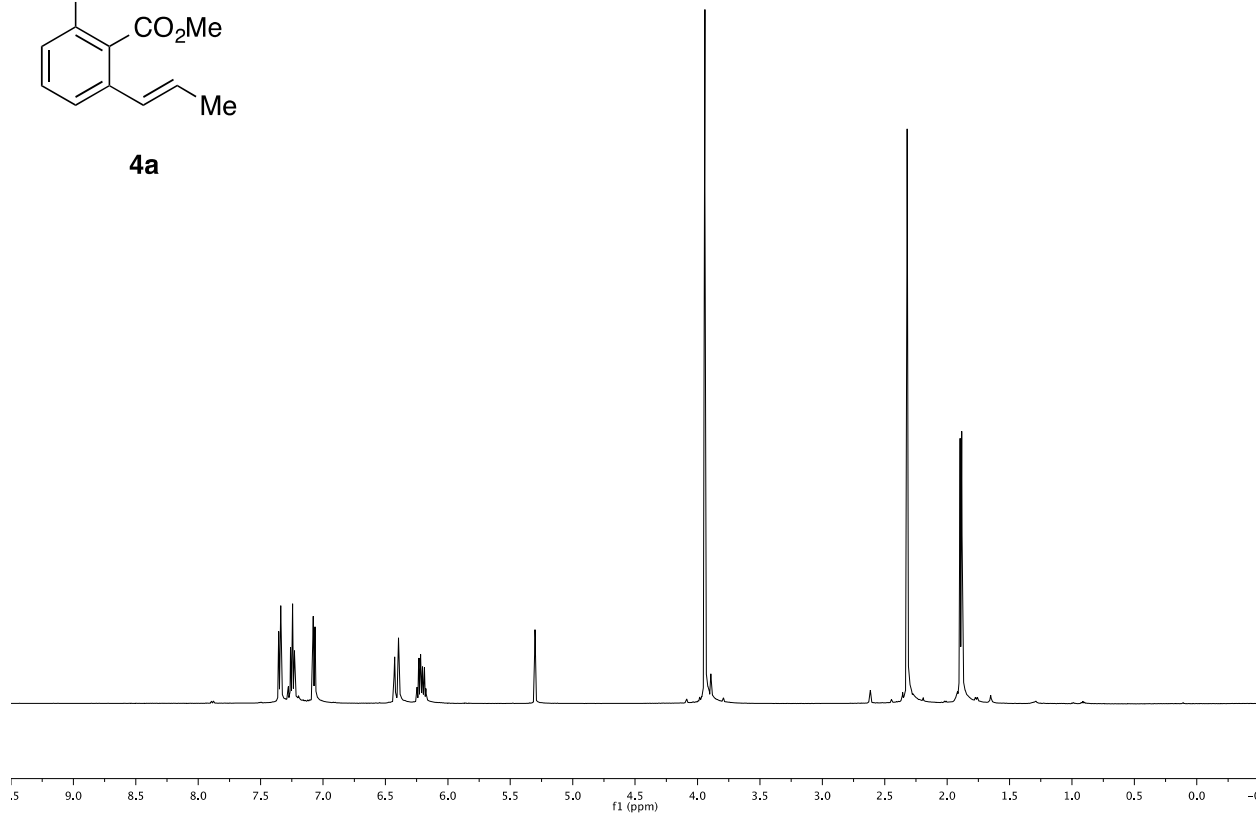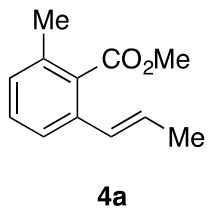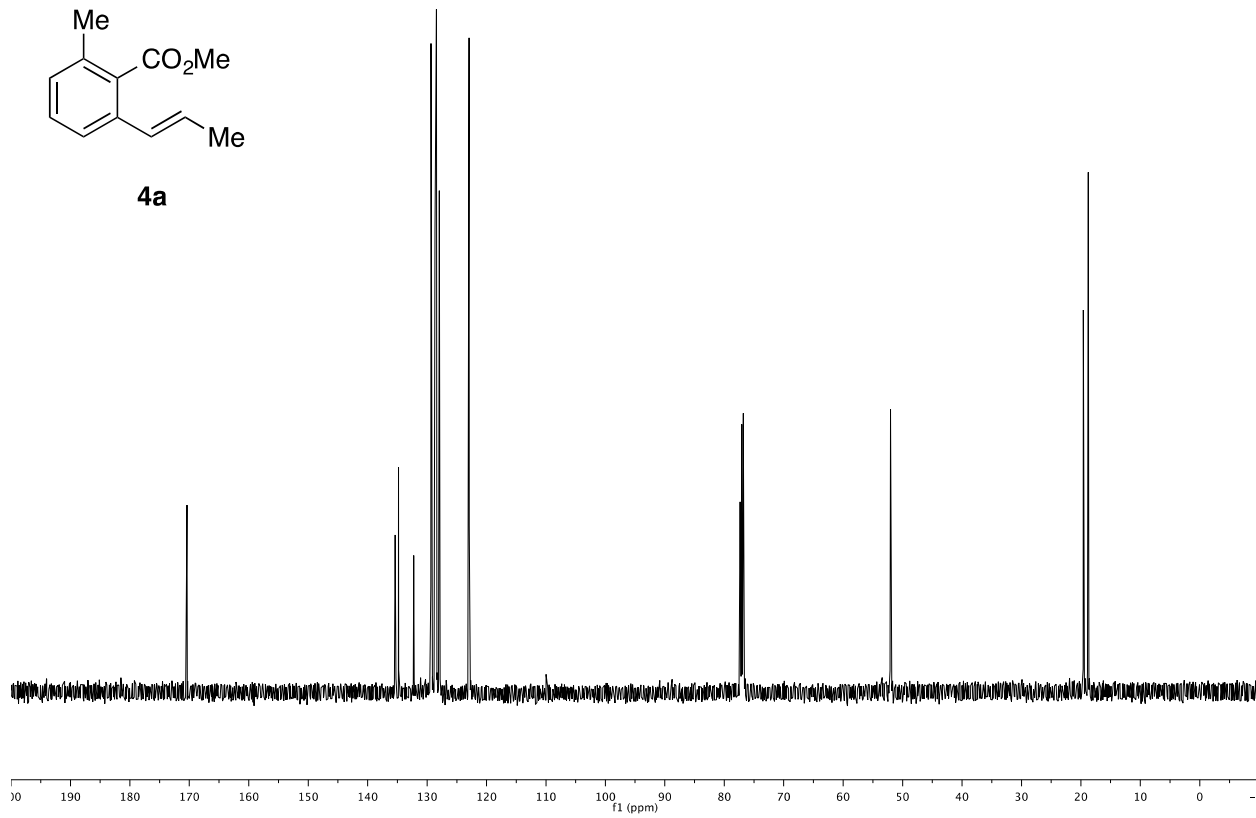

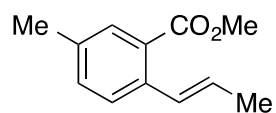

**4b**

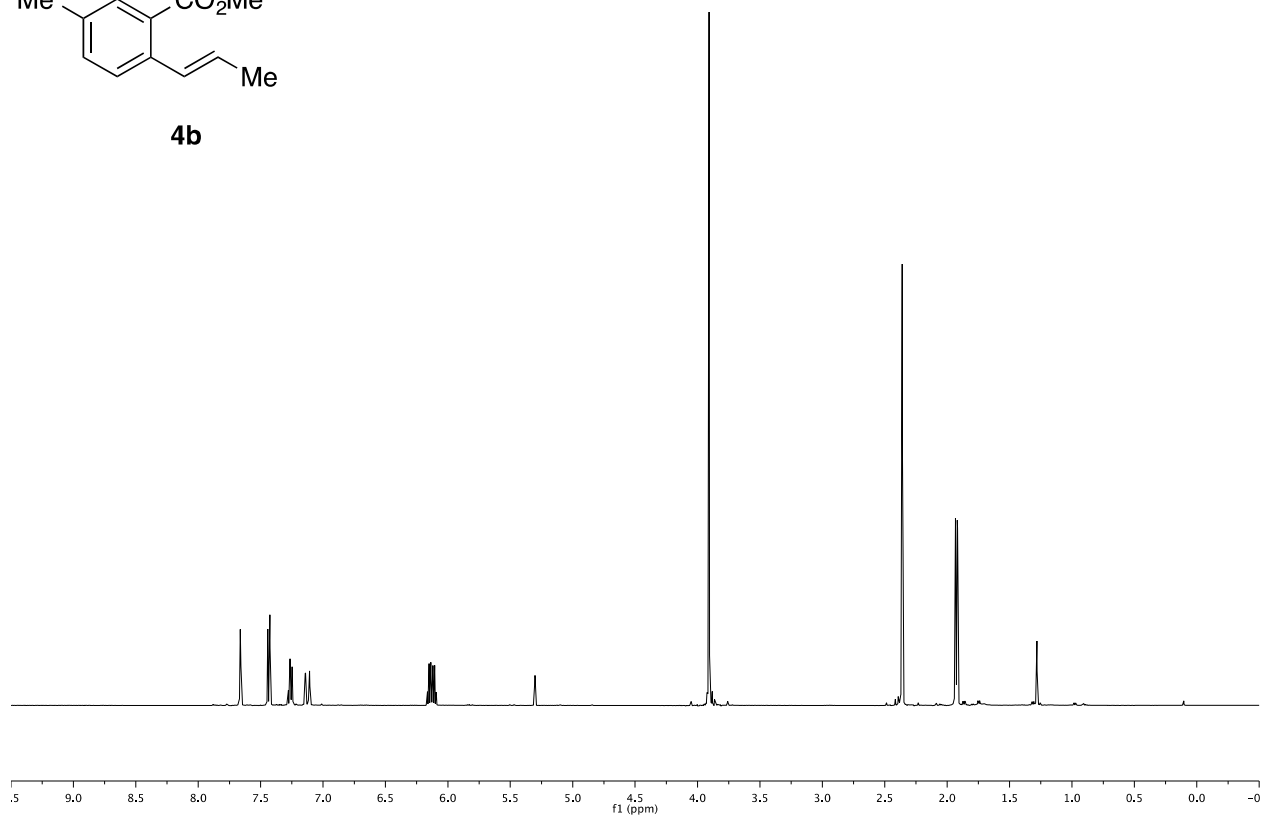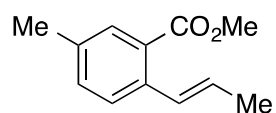

**4b**

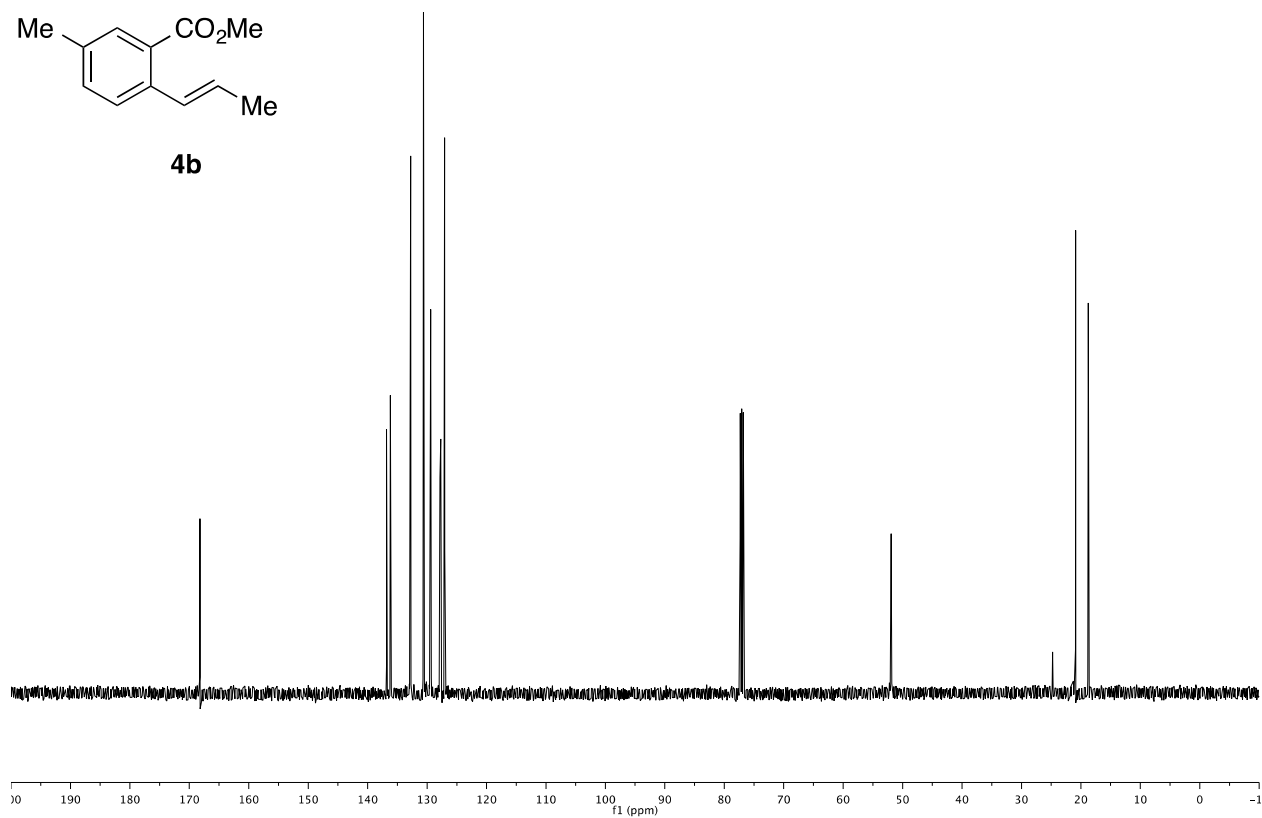

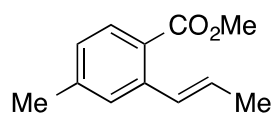

**4c**

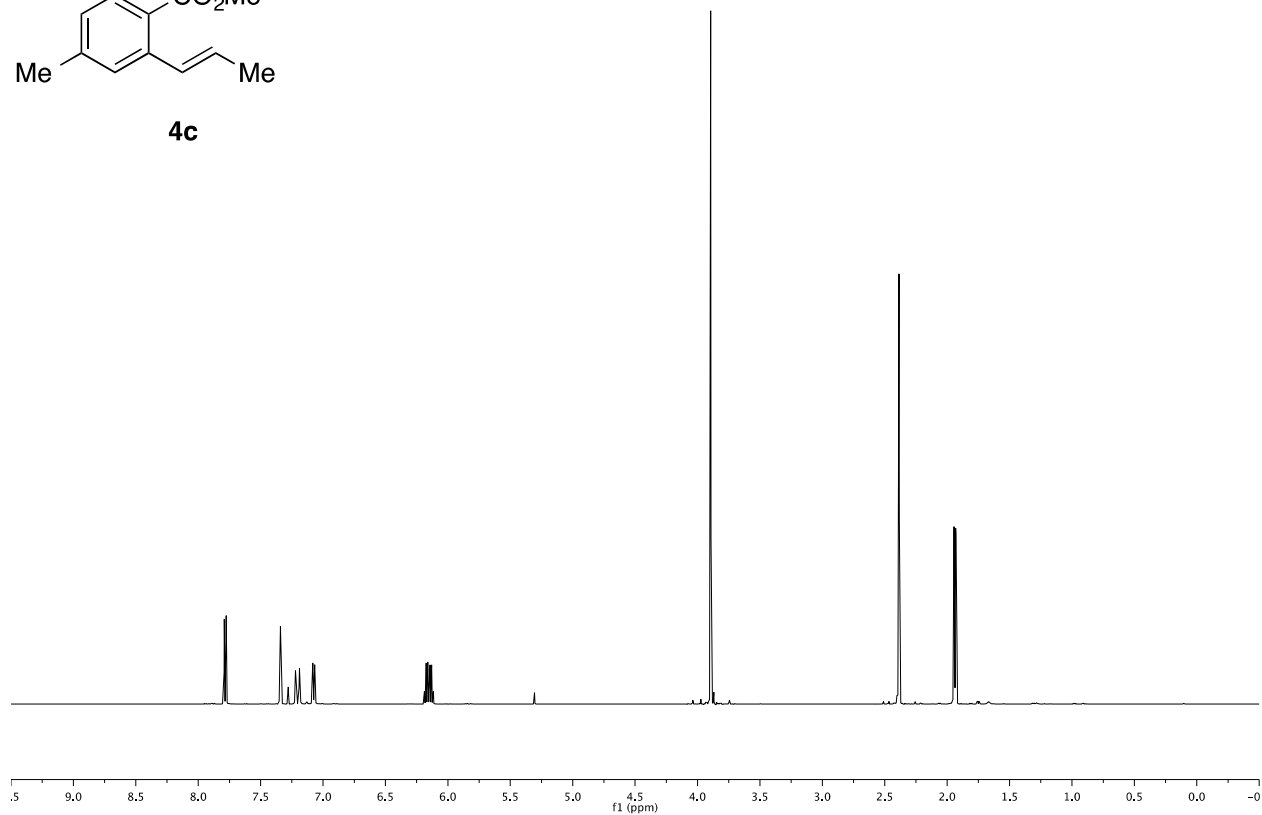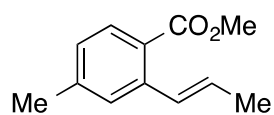

**4c**

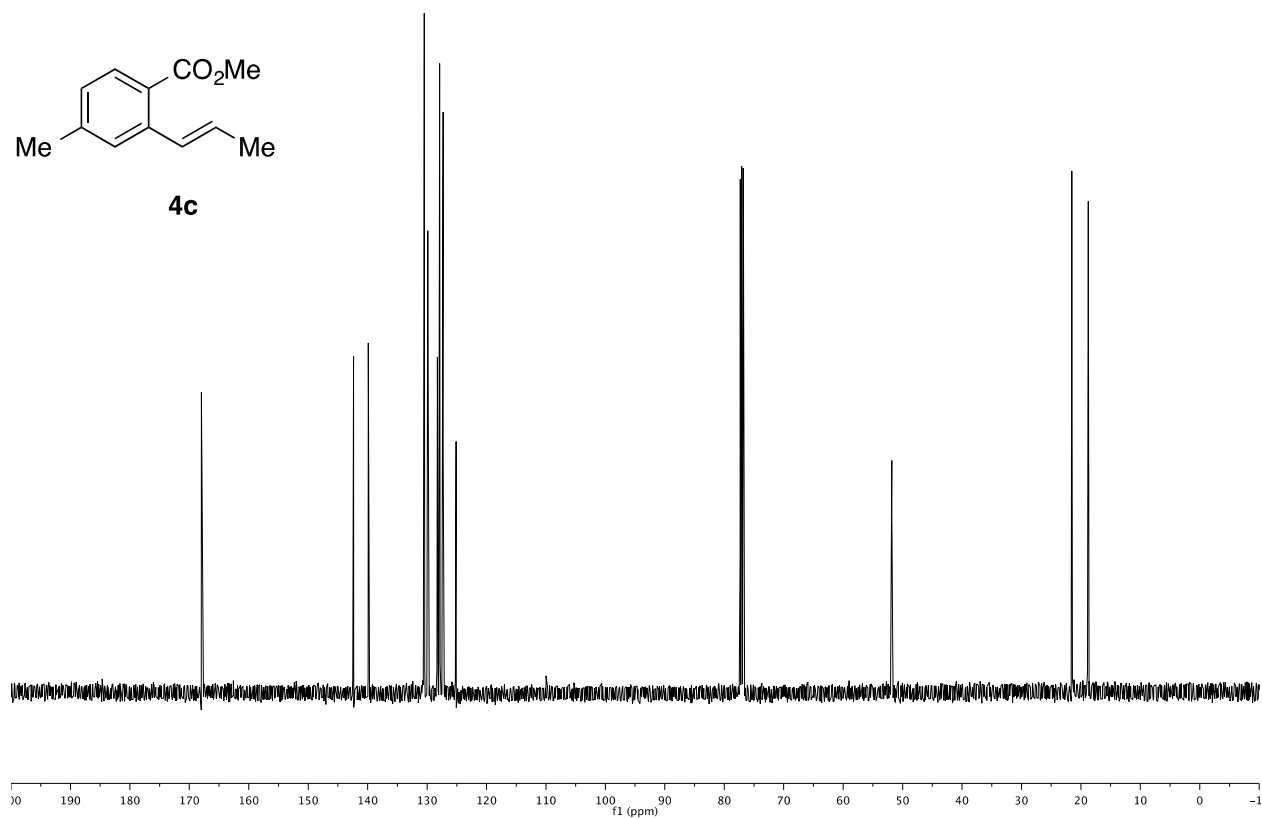

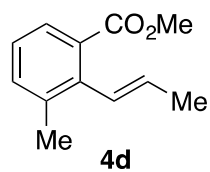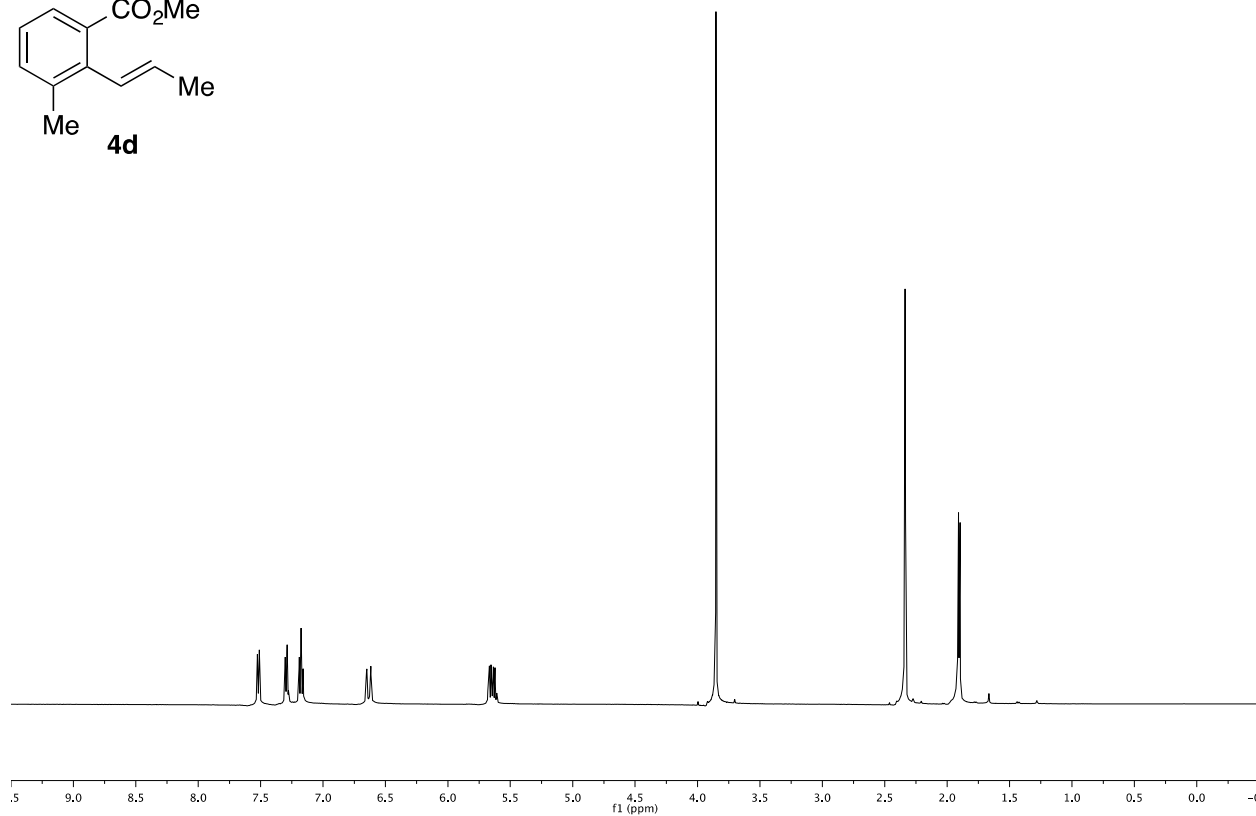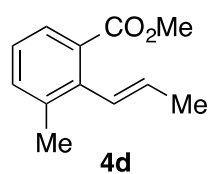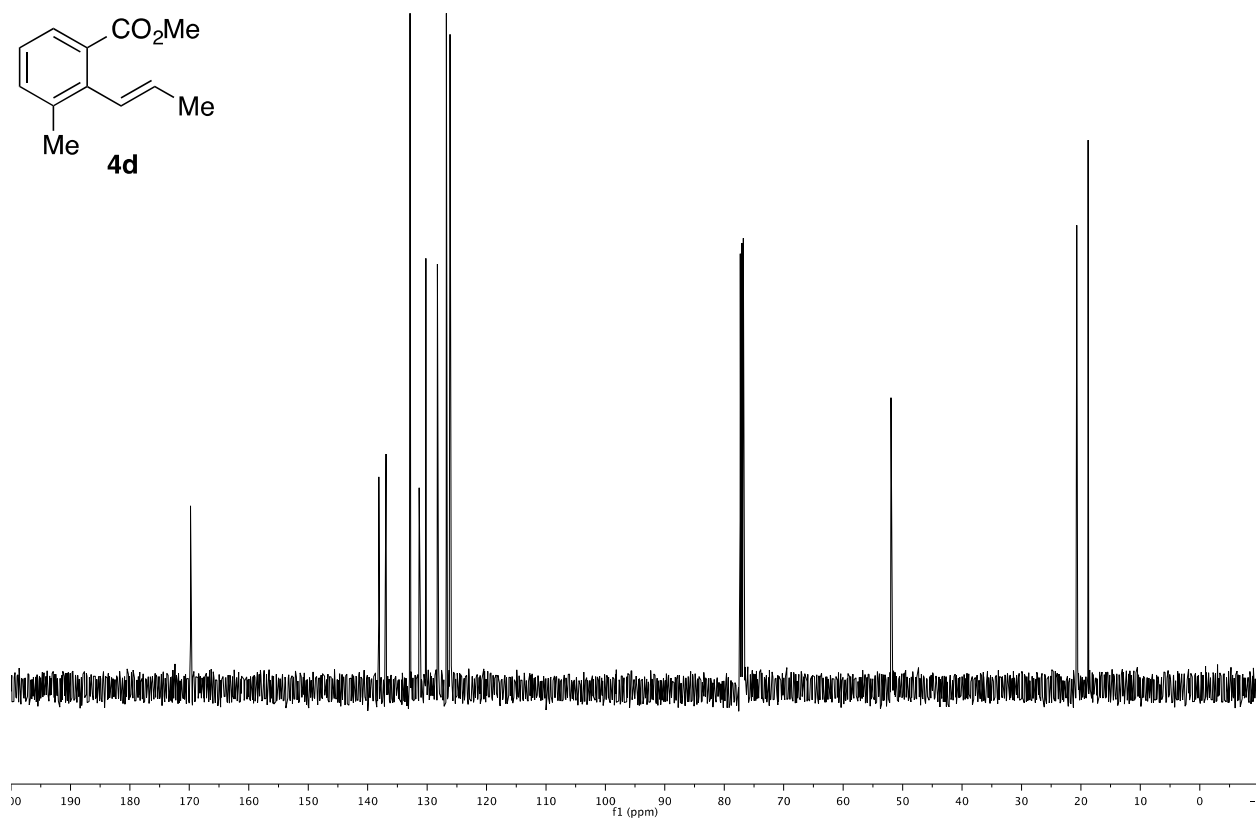



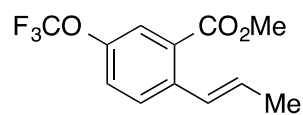

4e

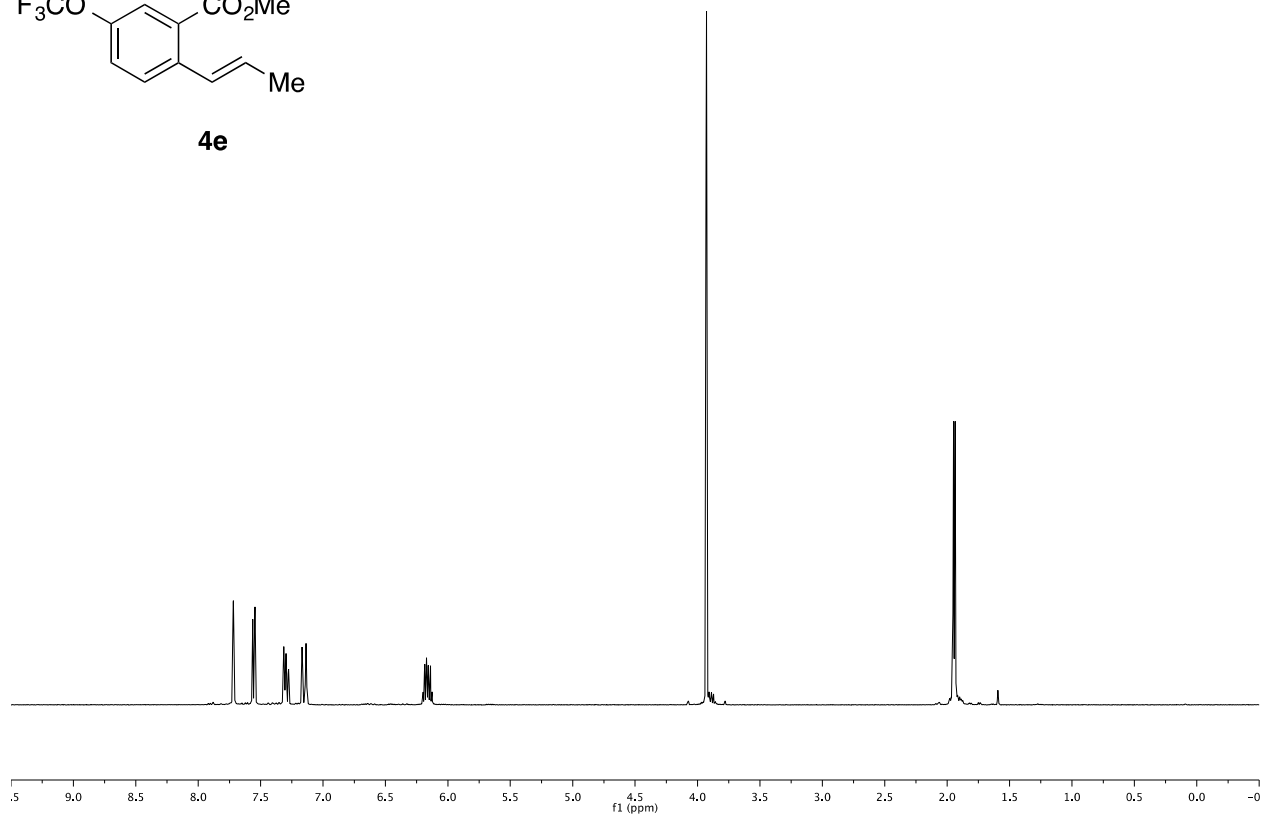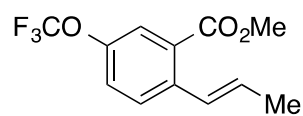

4e

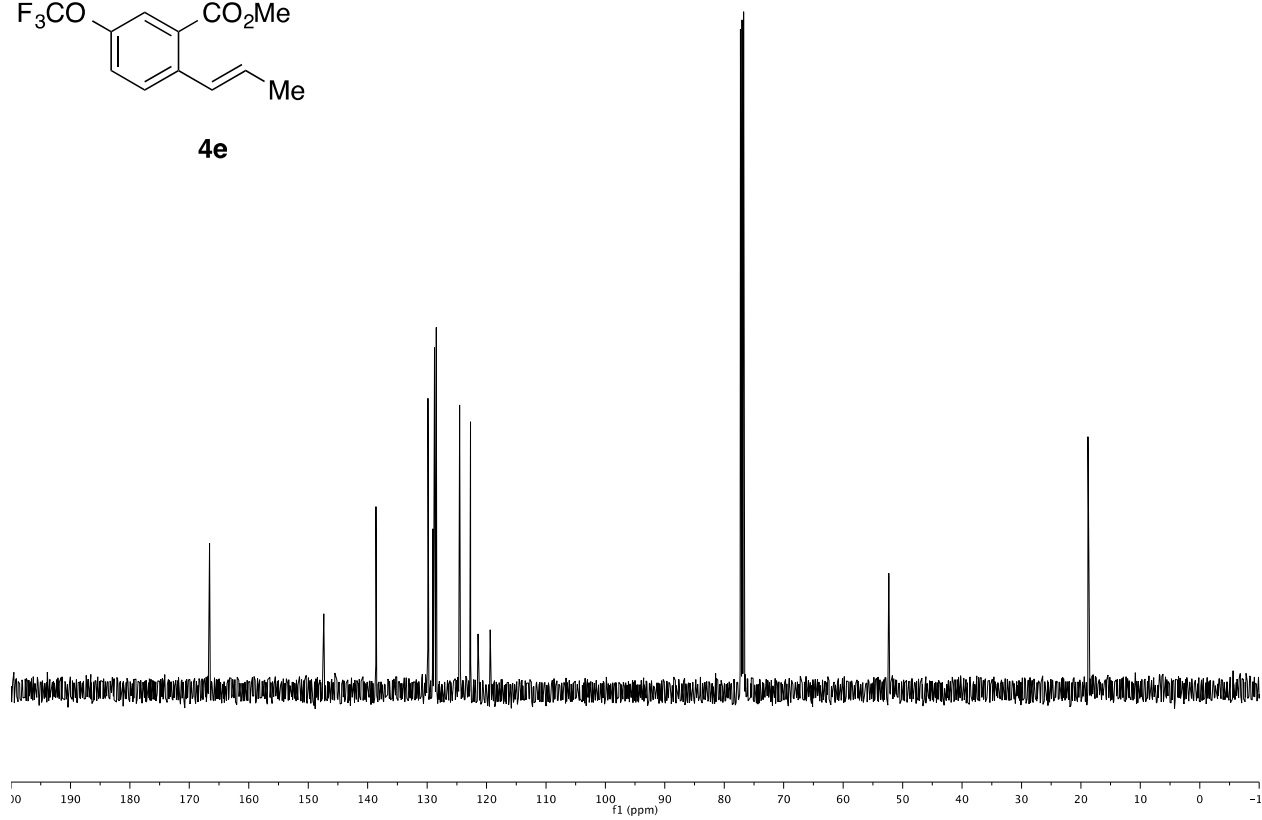

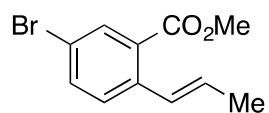

**4f**

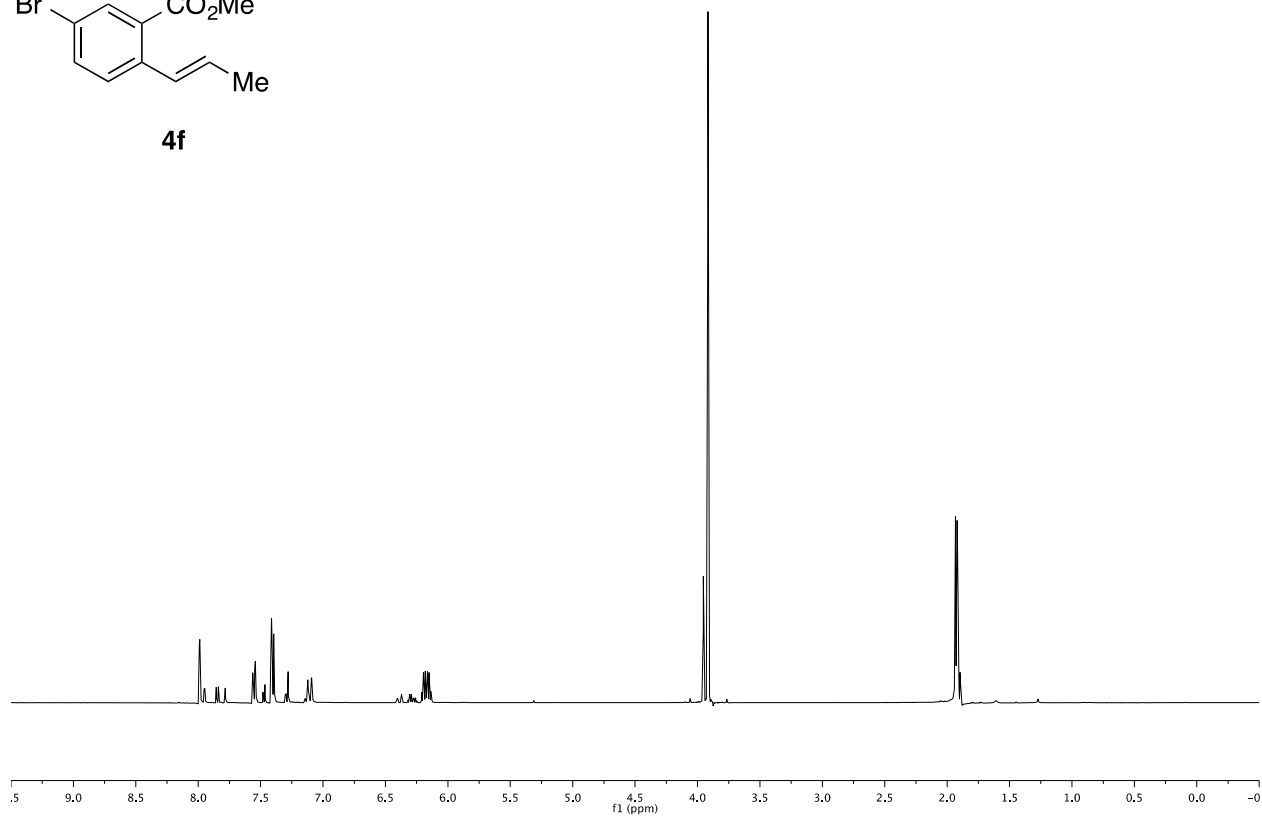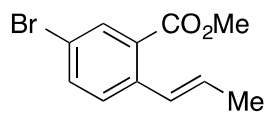

**4f**

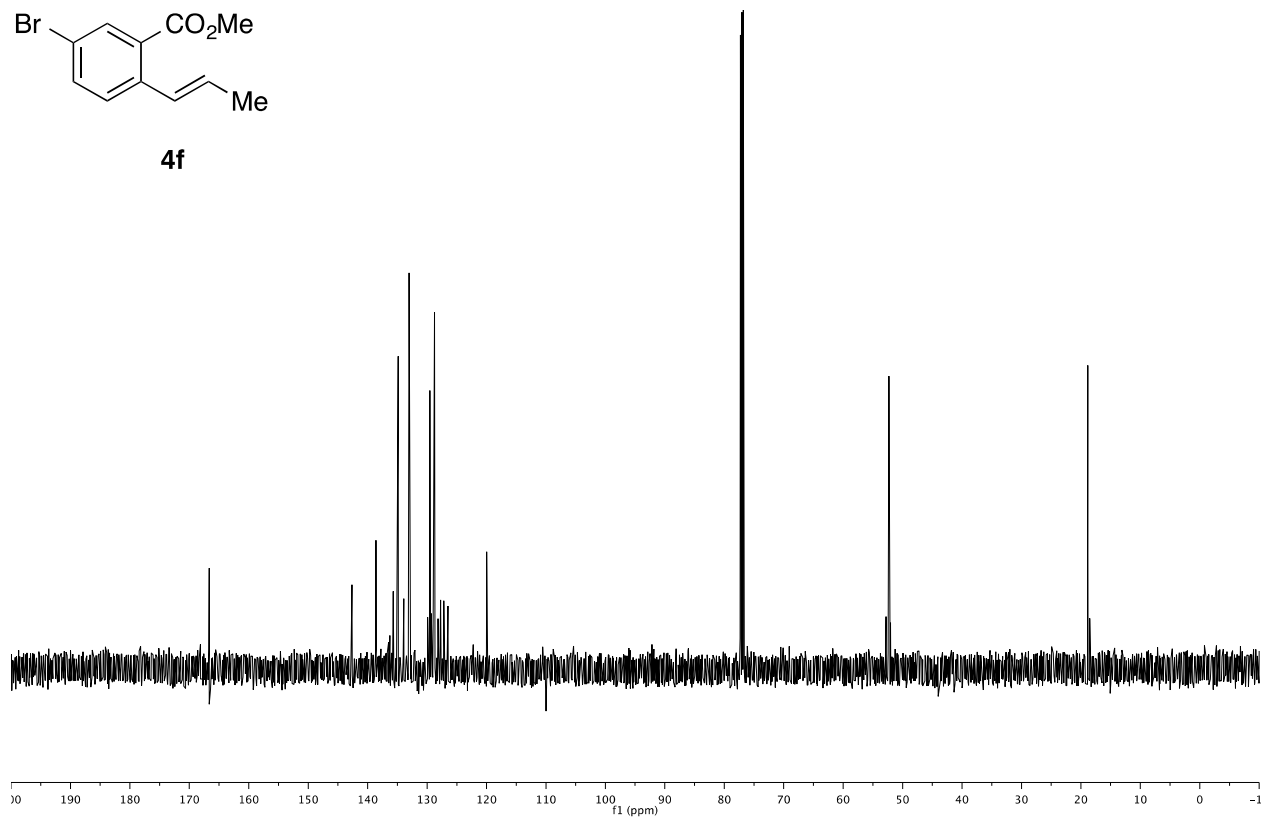

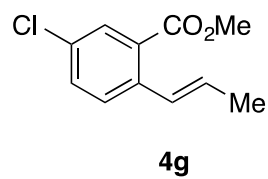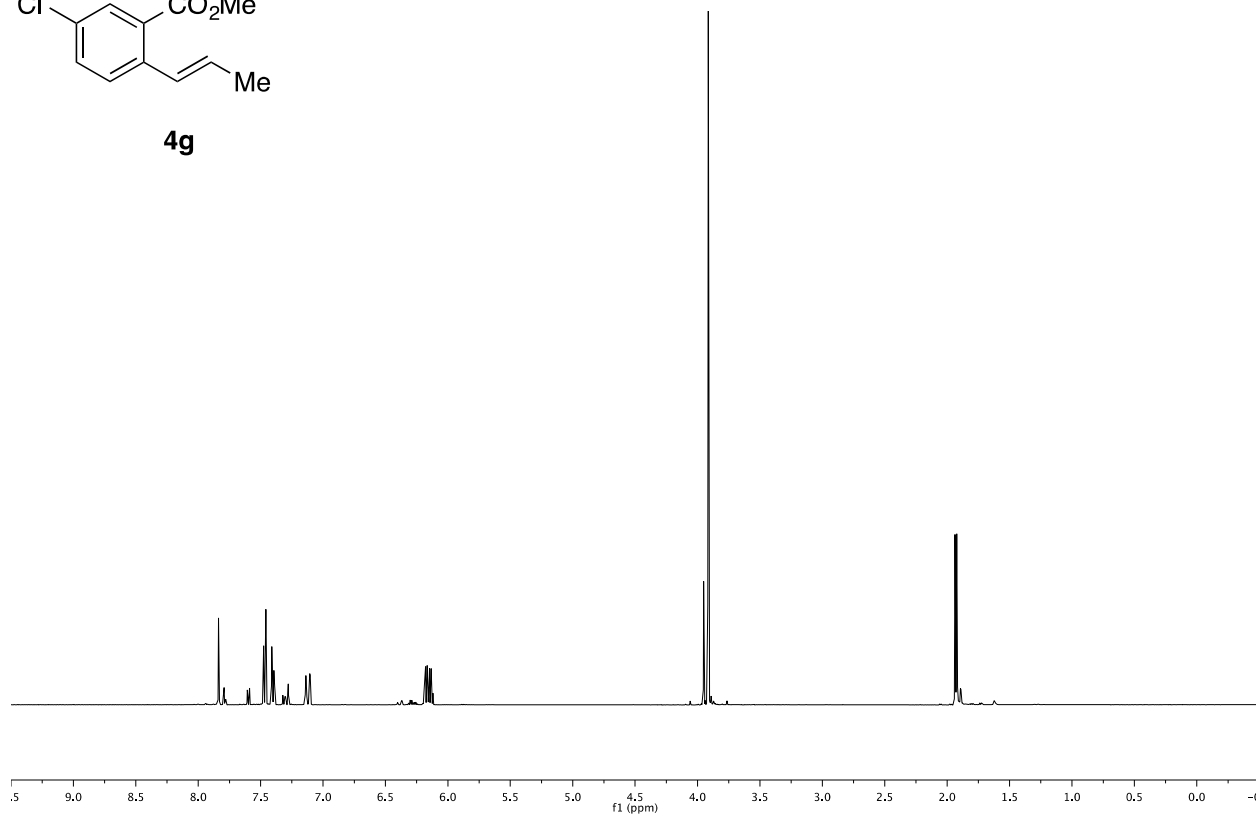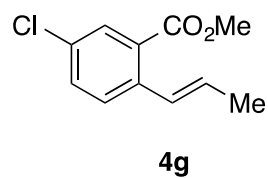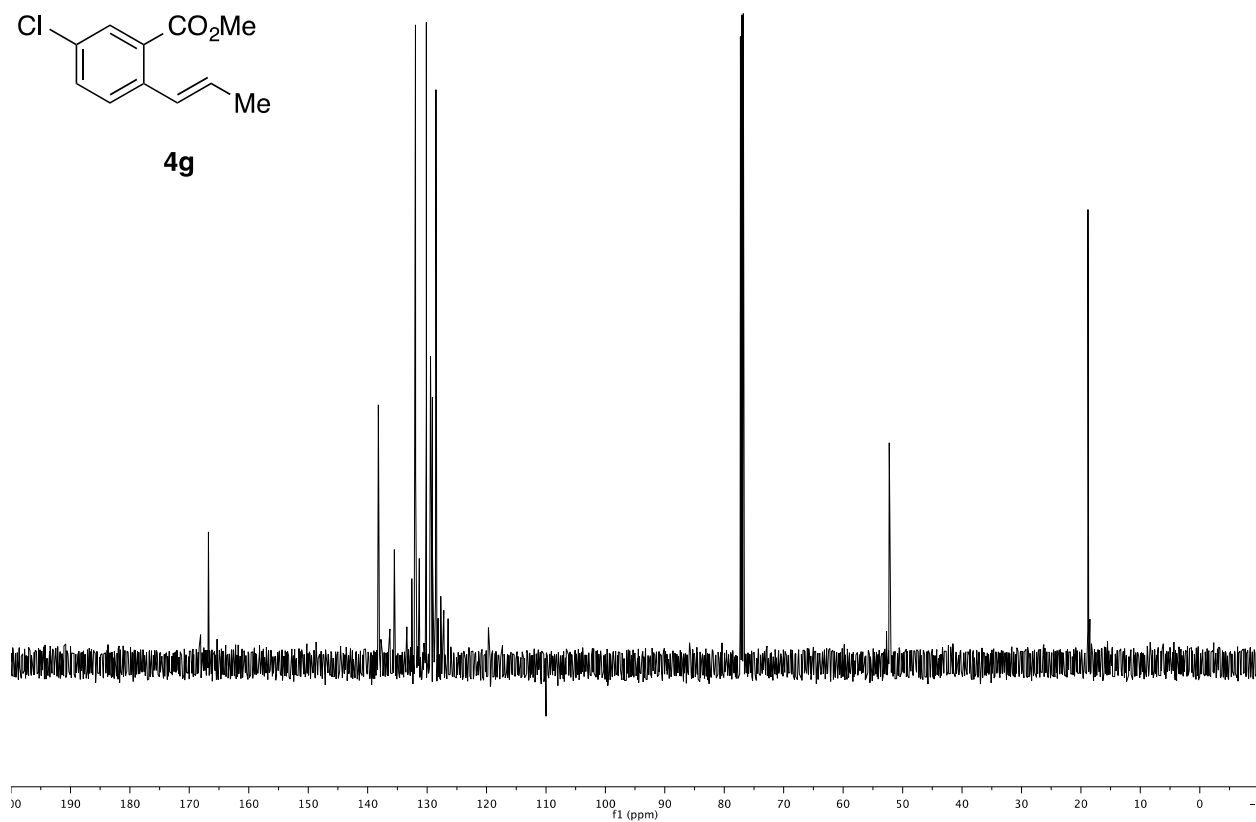

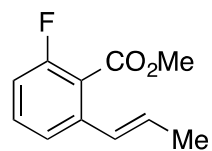

**4h**

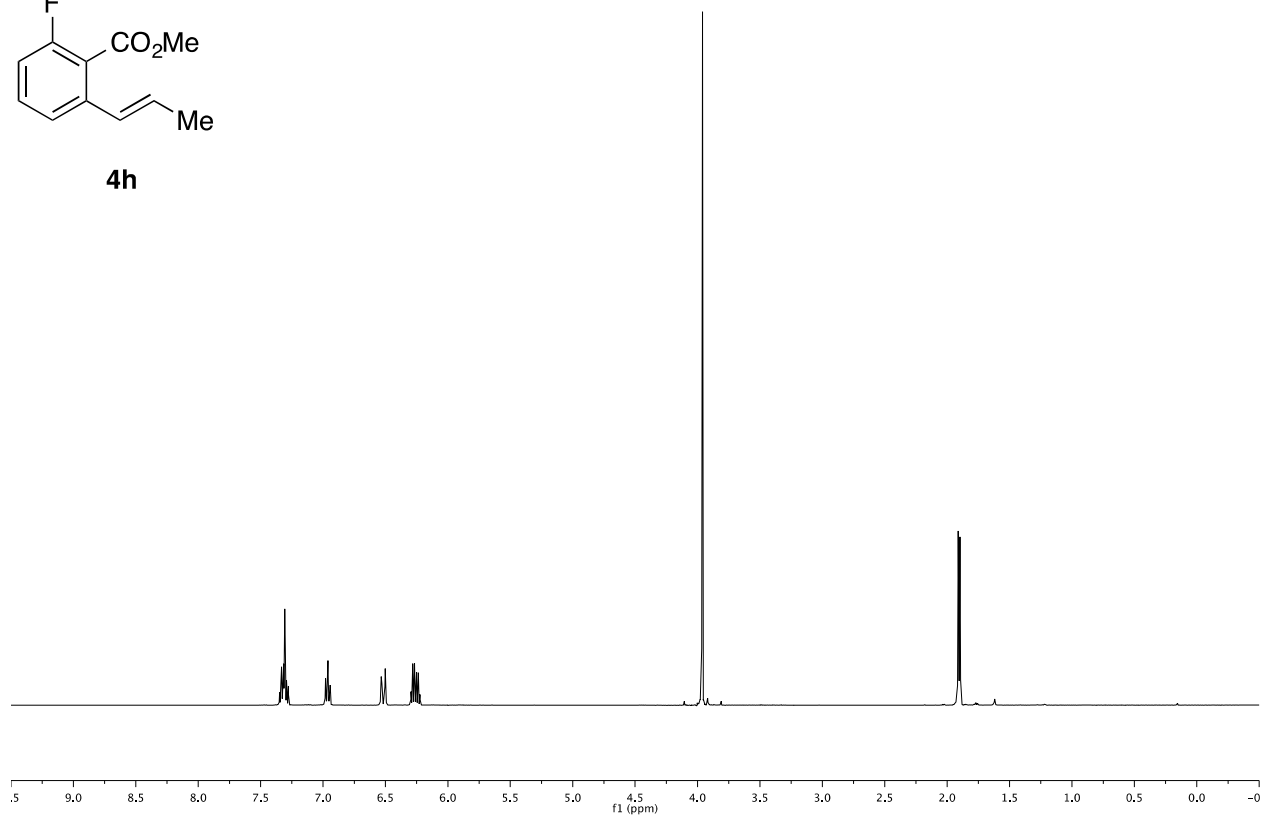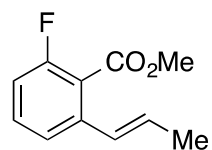

**4h**

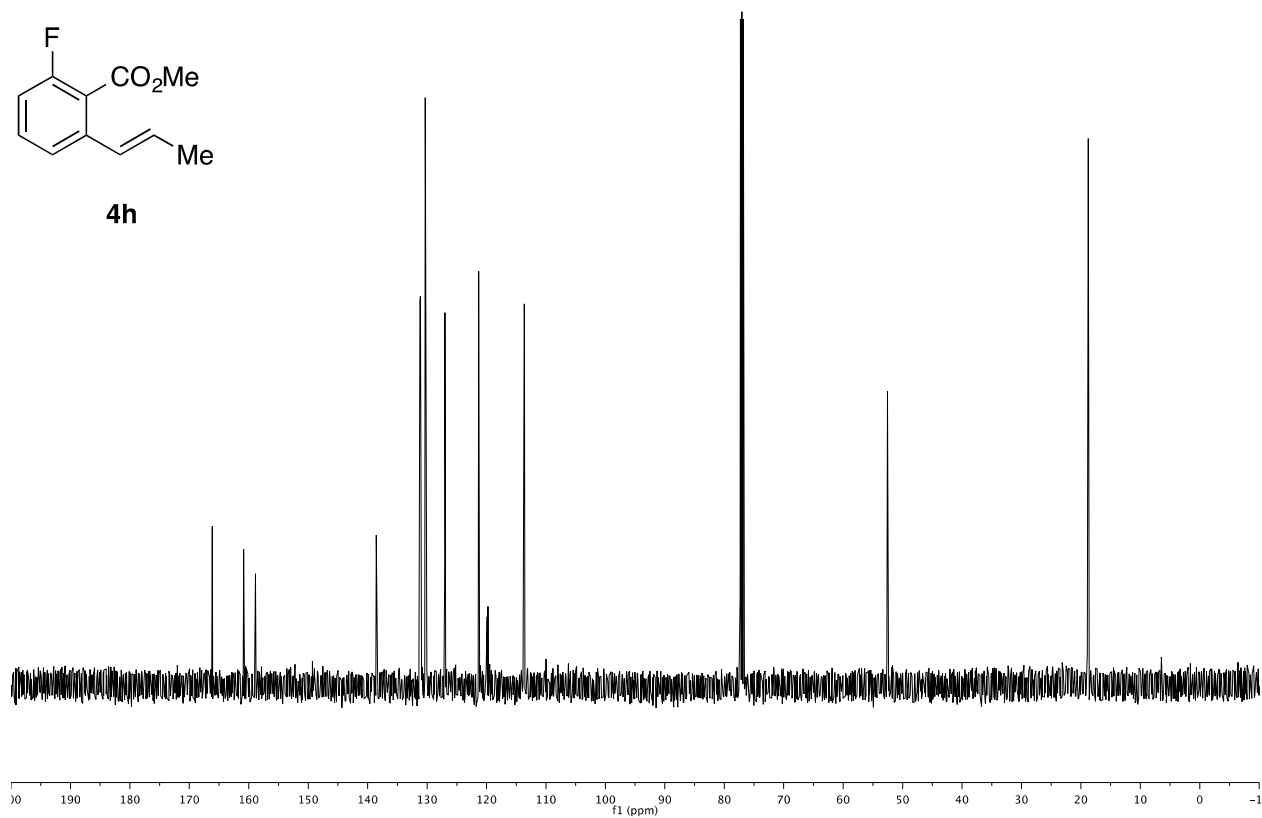

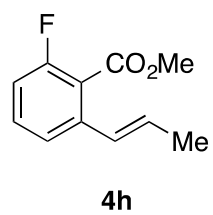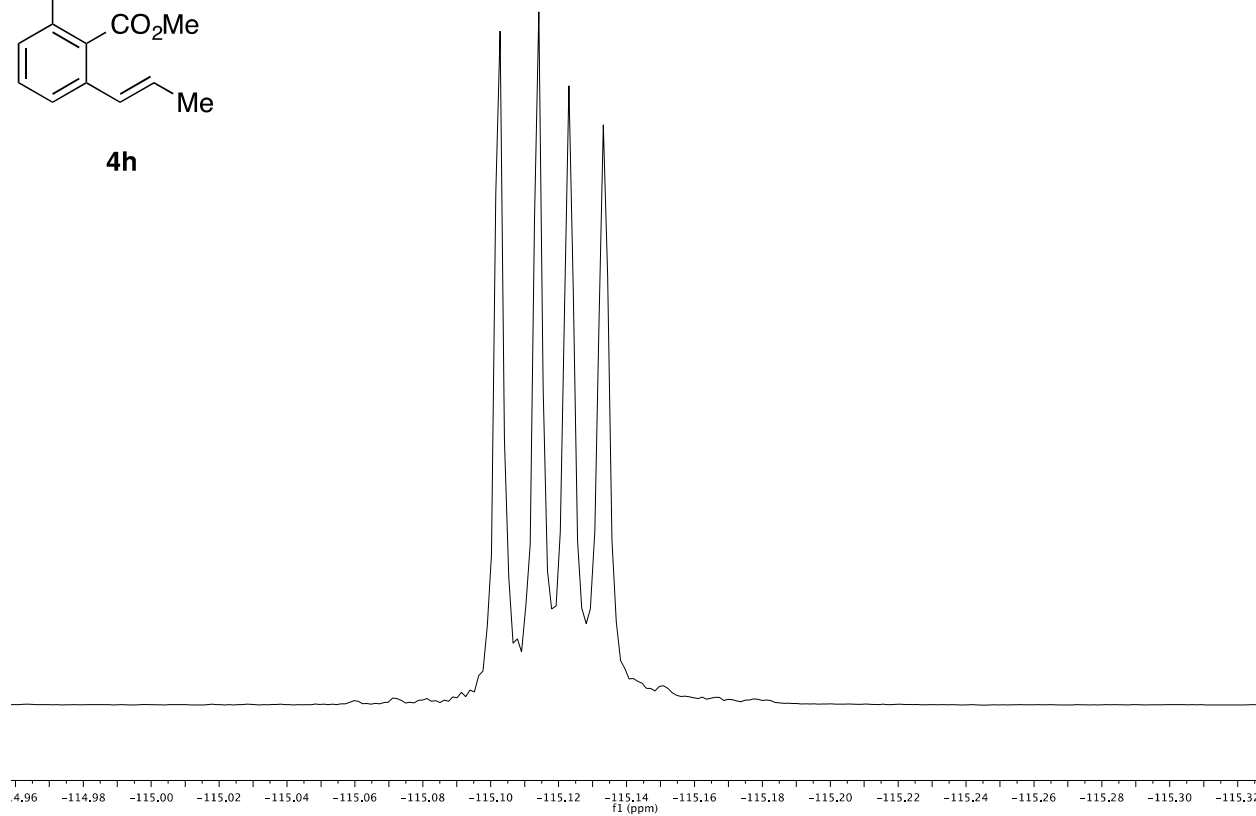

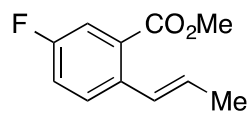

**4i**

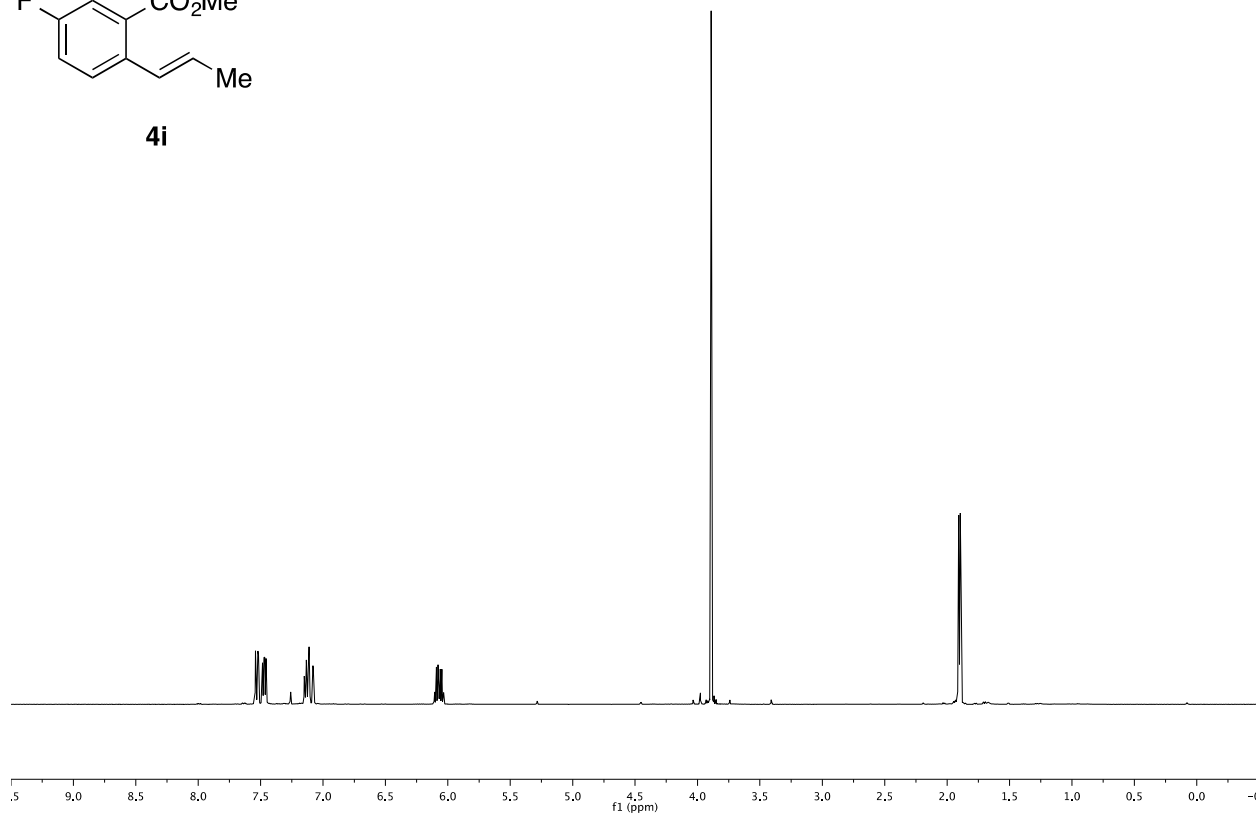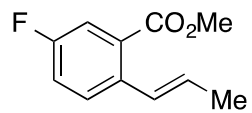

**4i**

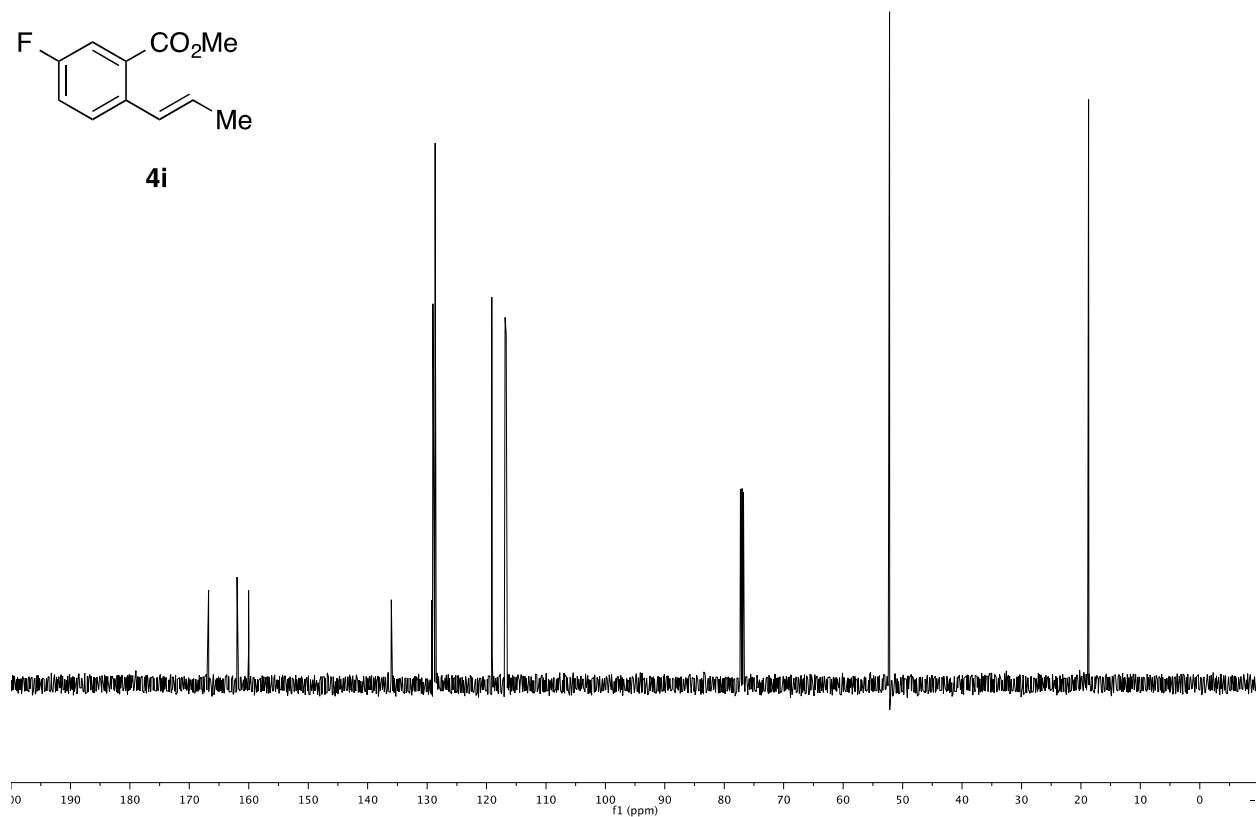

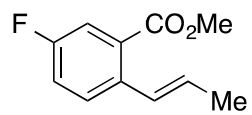

4i

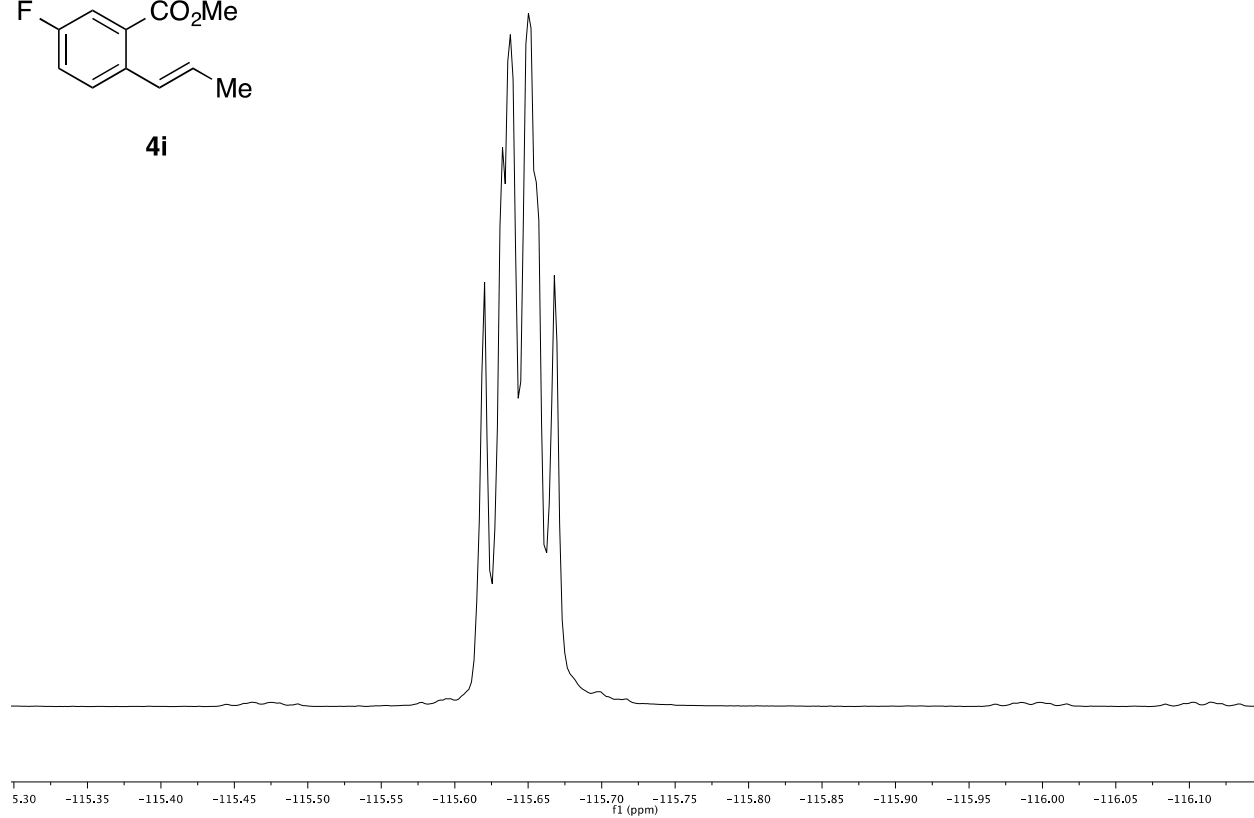

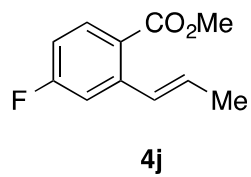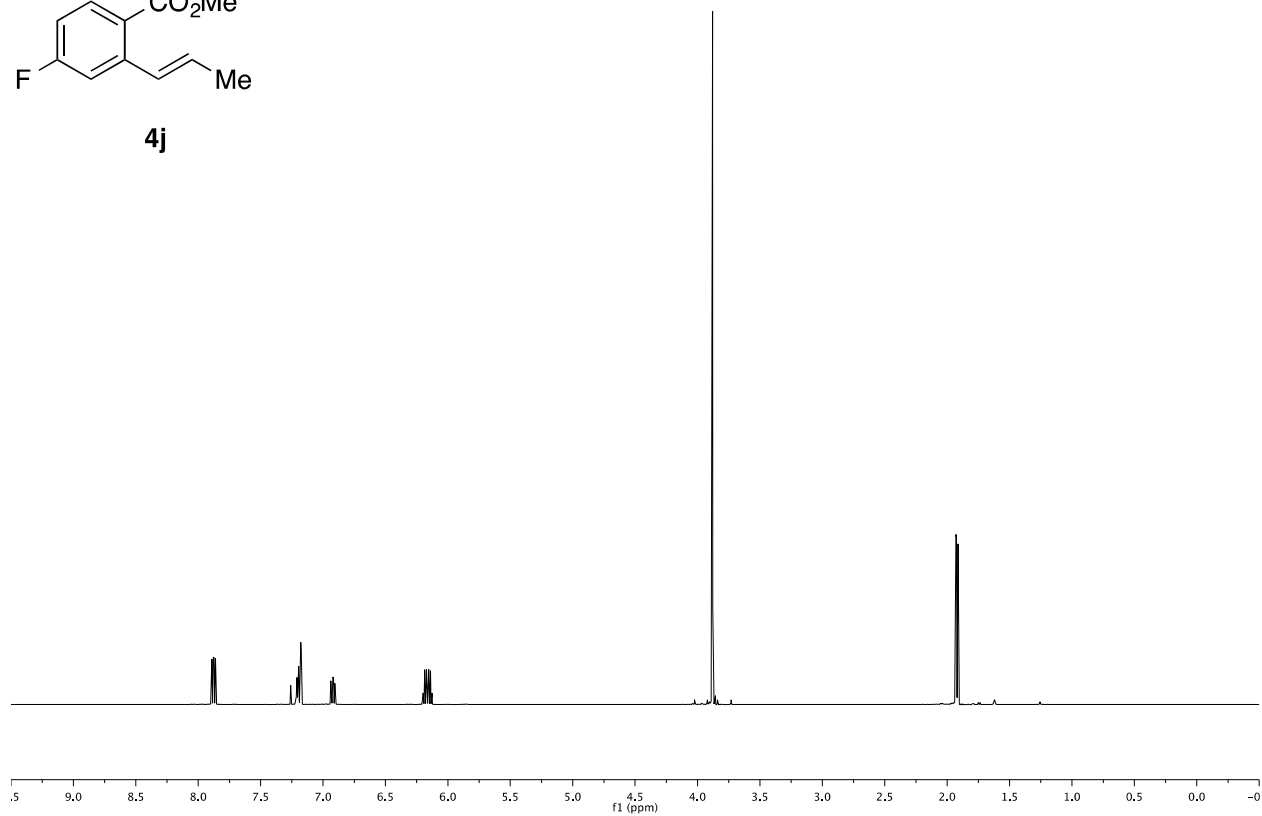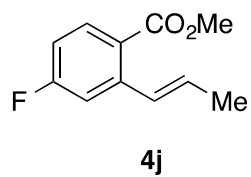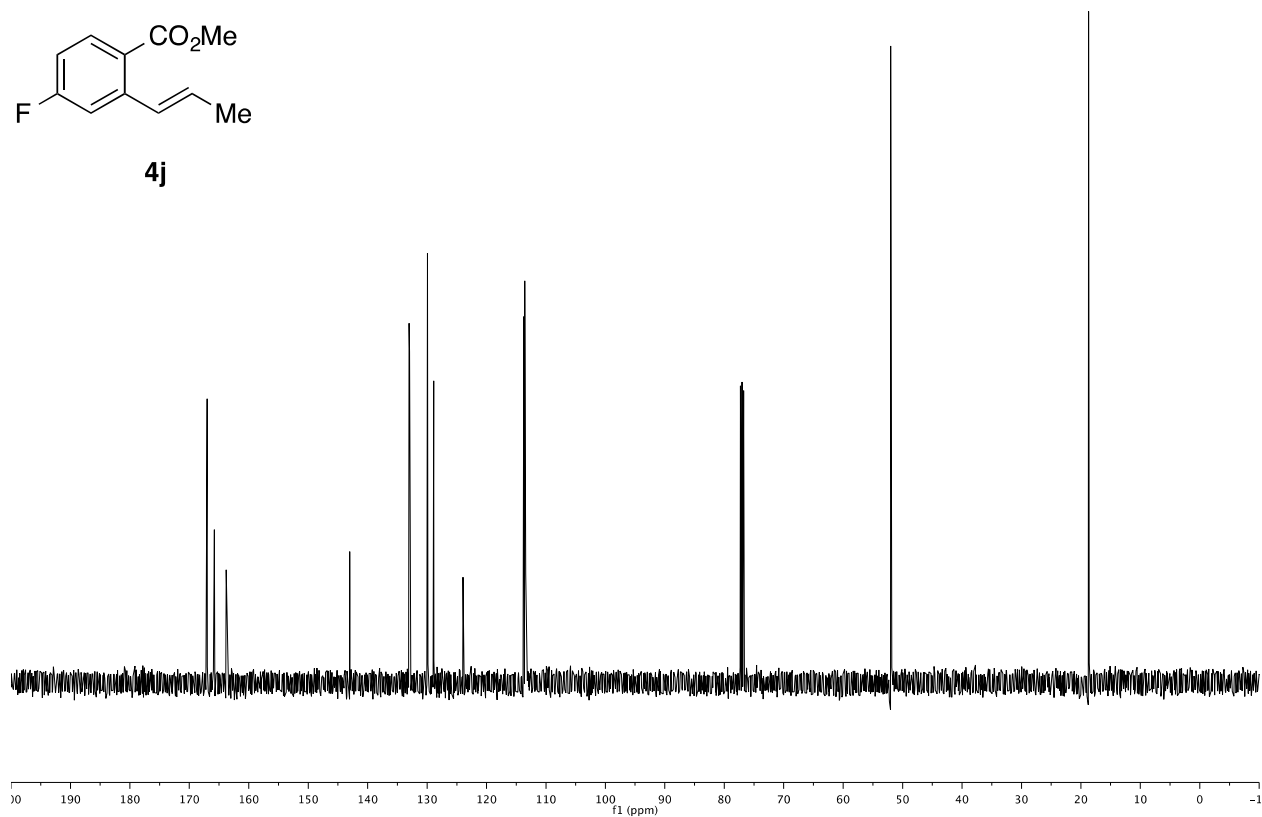



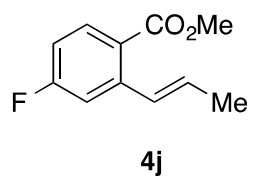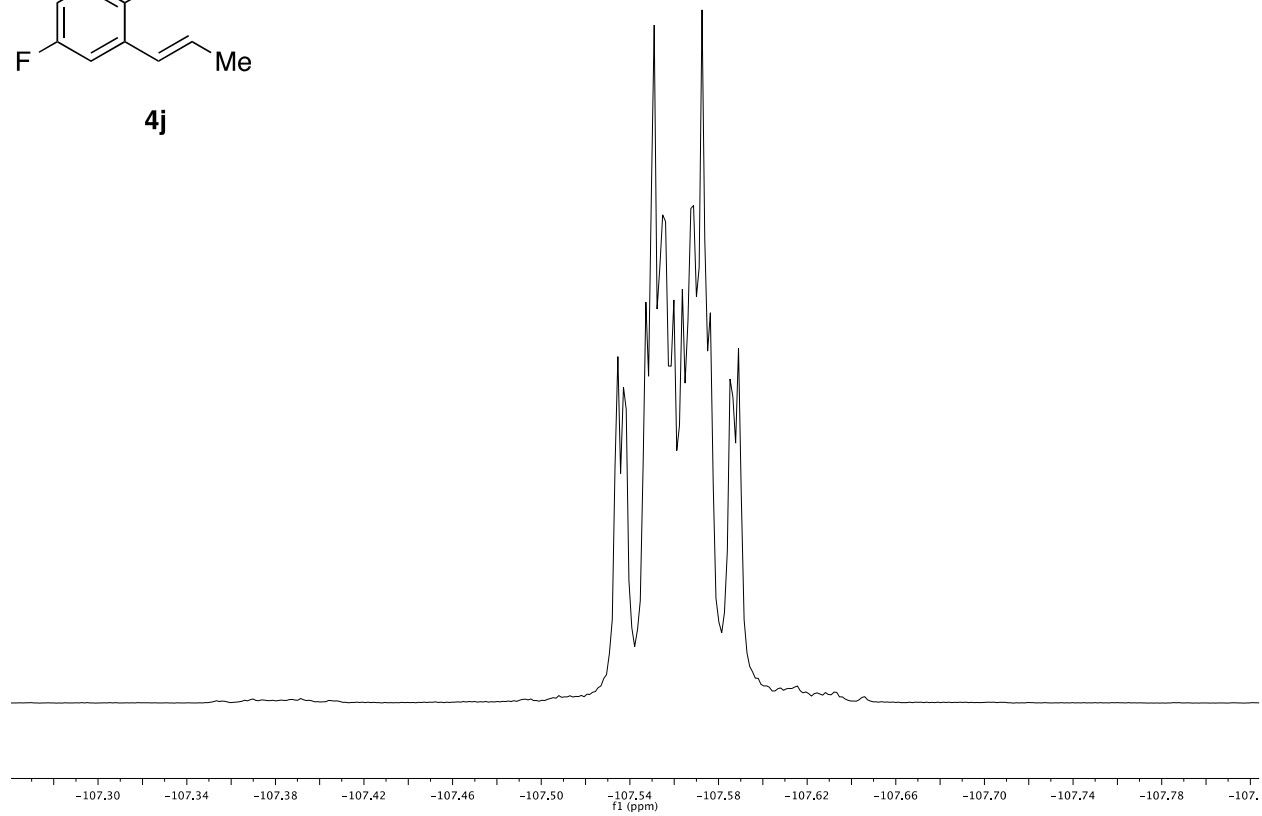

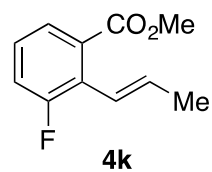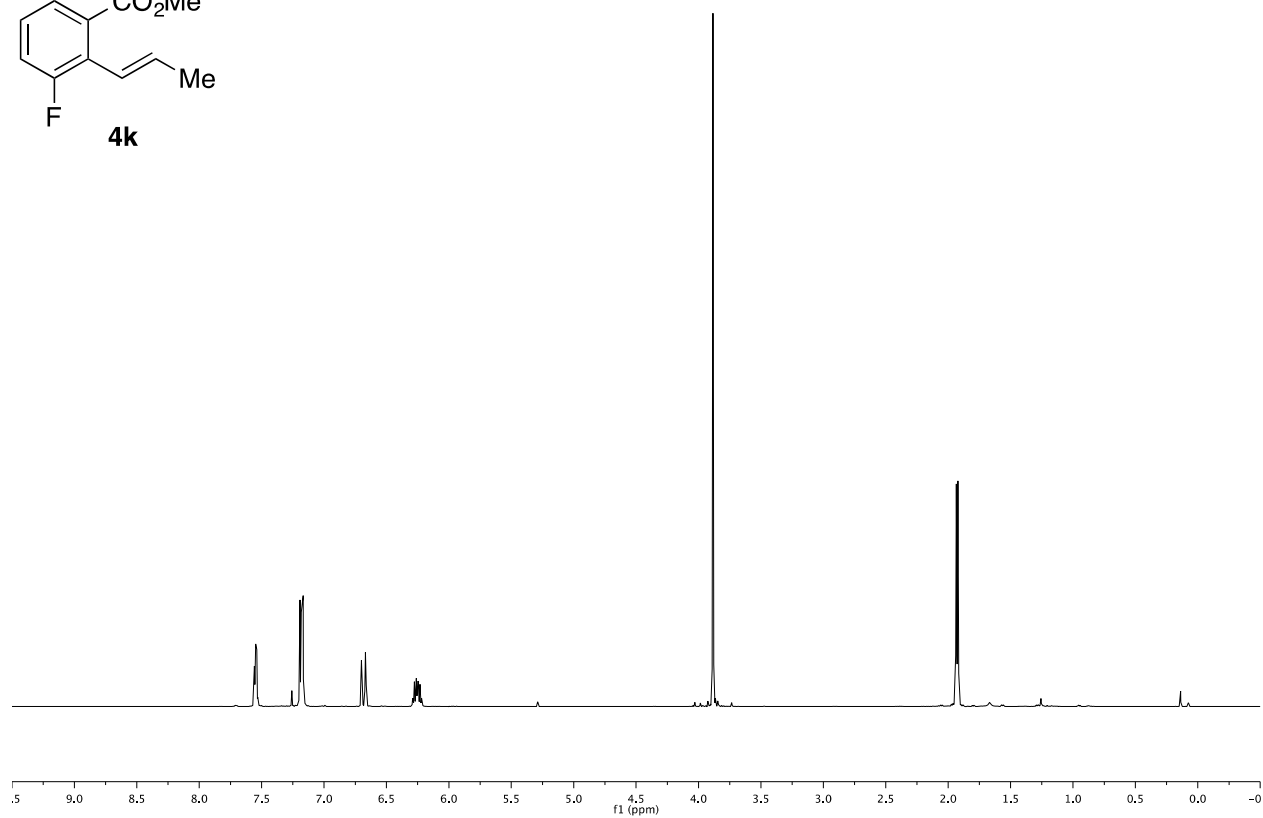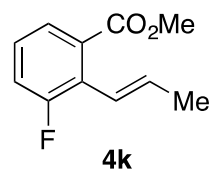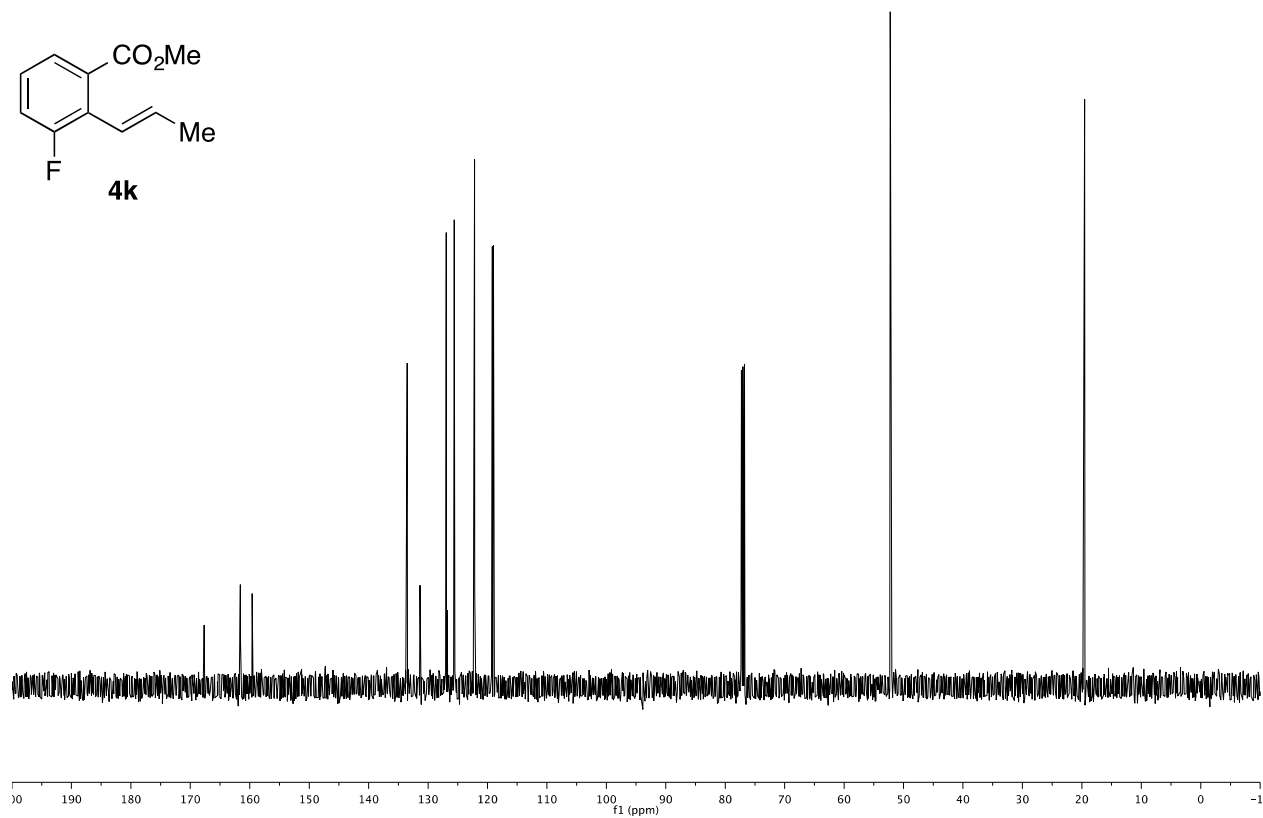

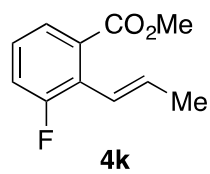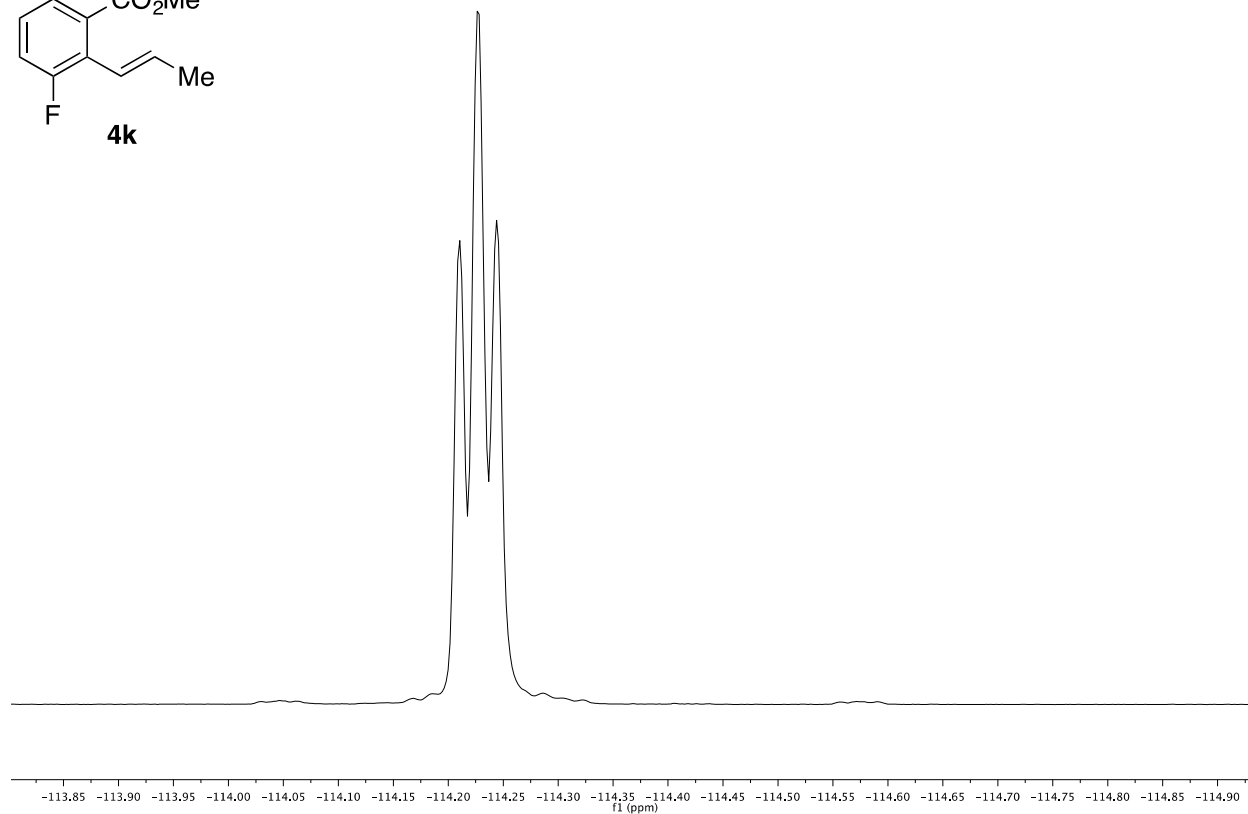

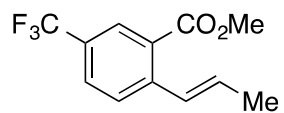

4I

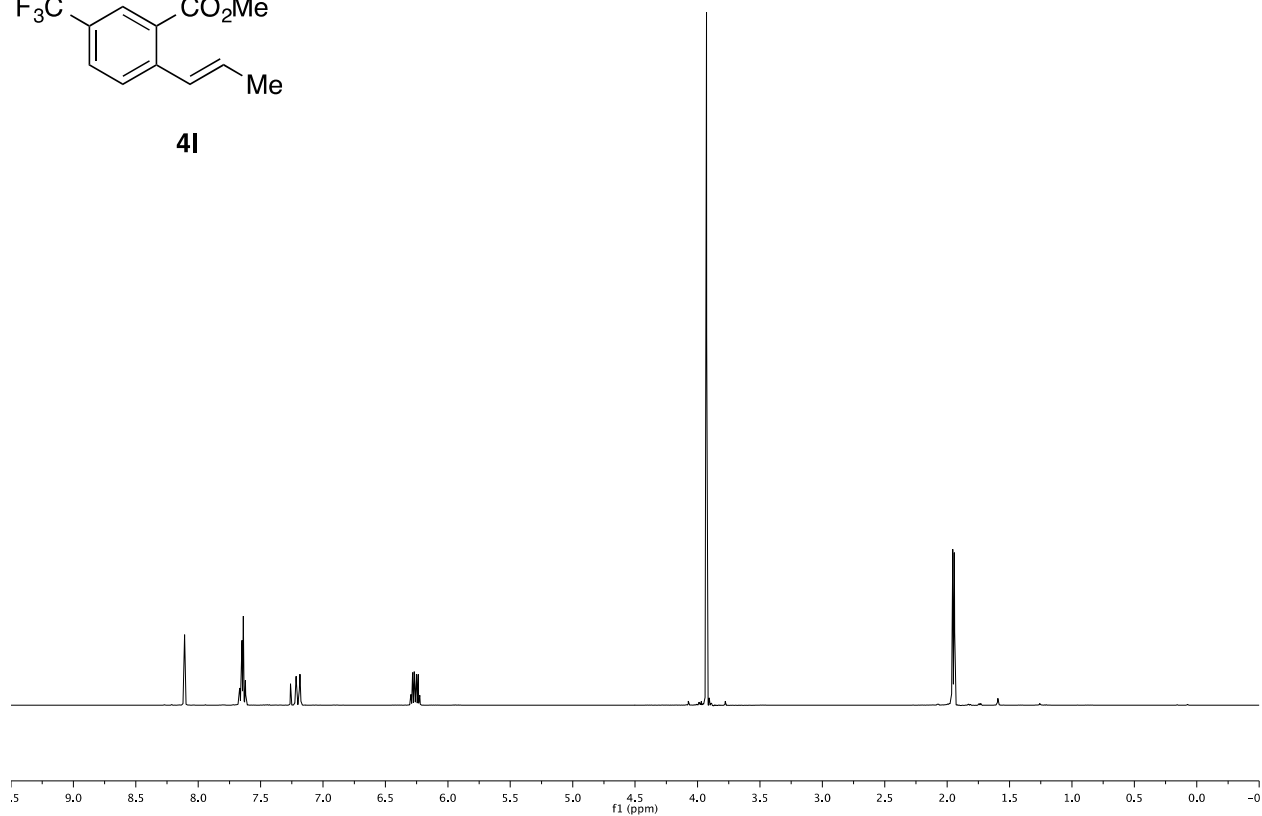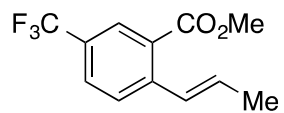

4I

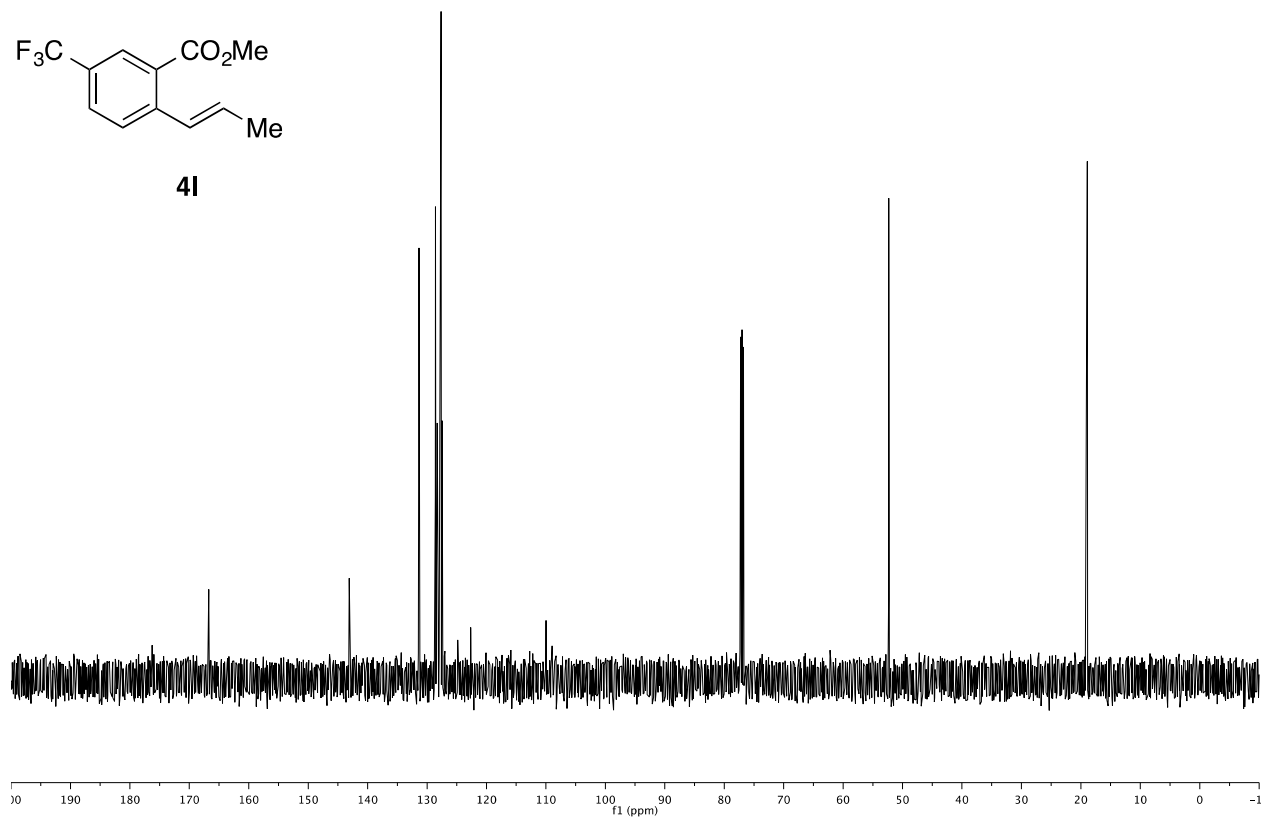

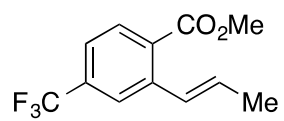

4m

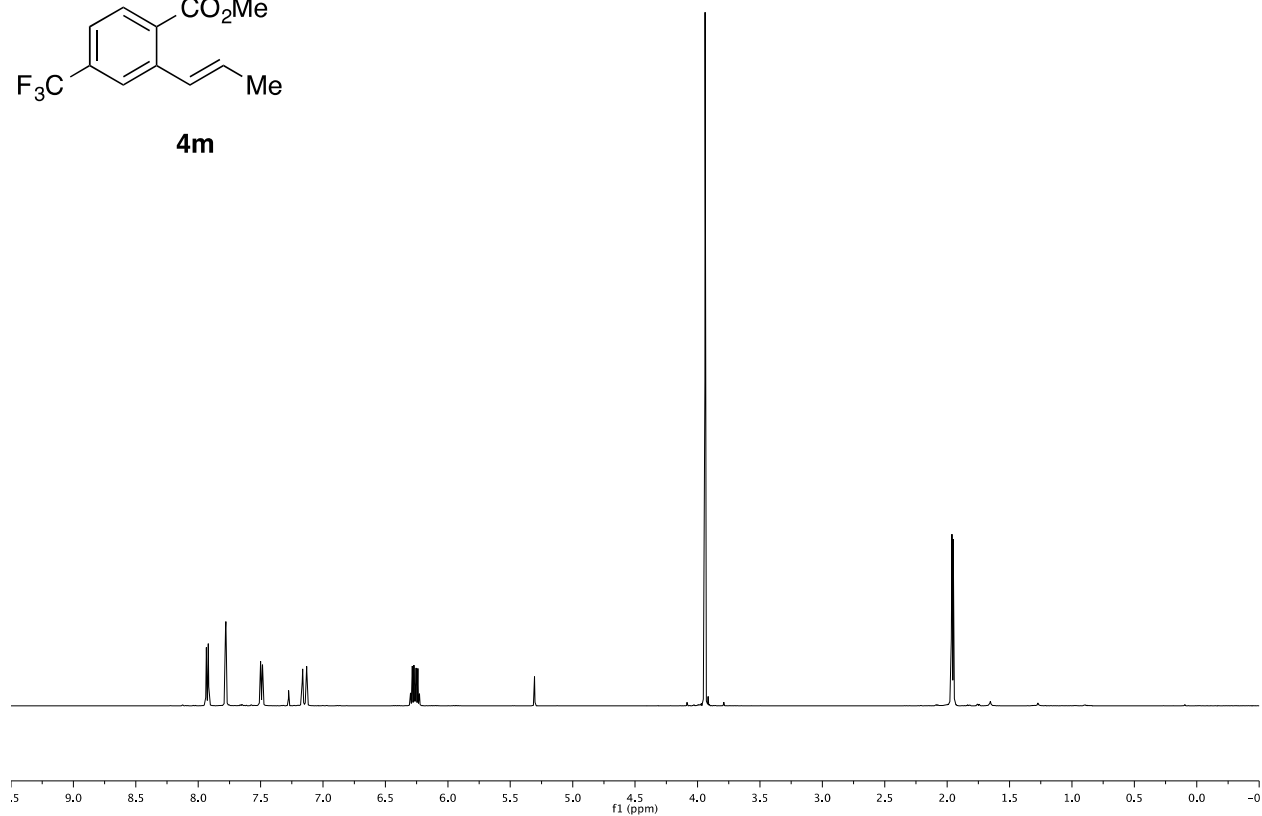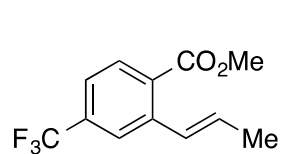

4m

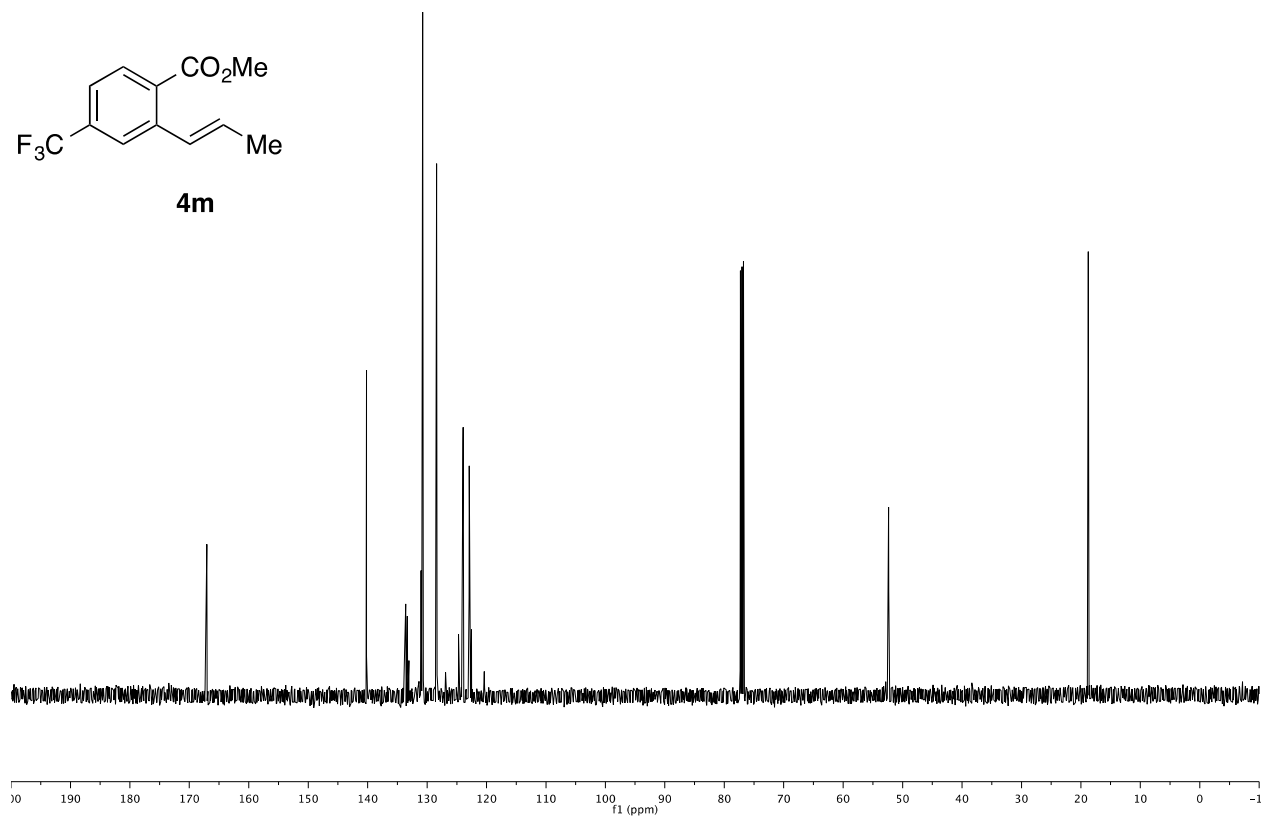

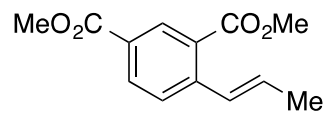

4n

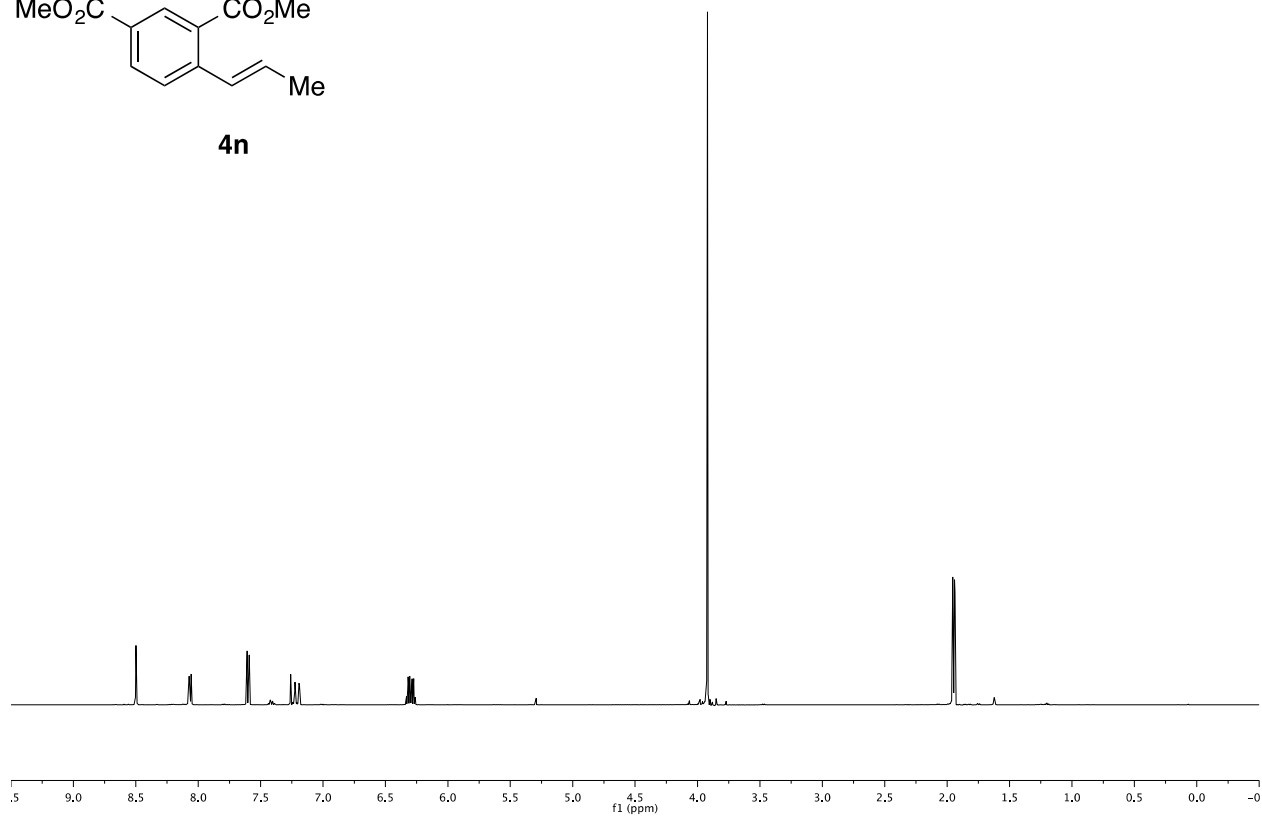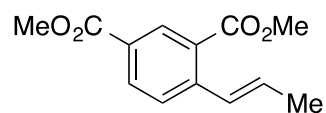

4n

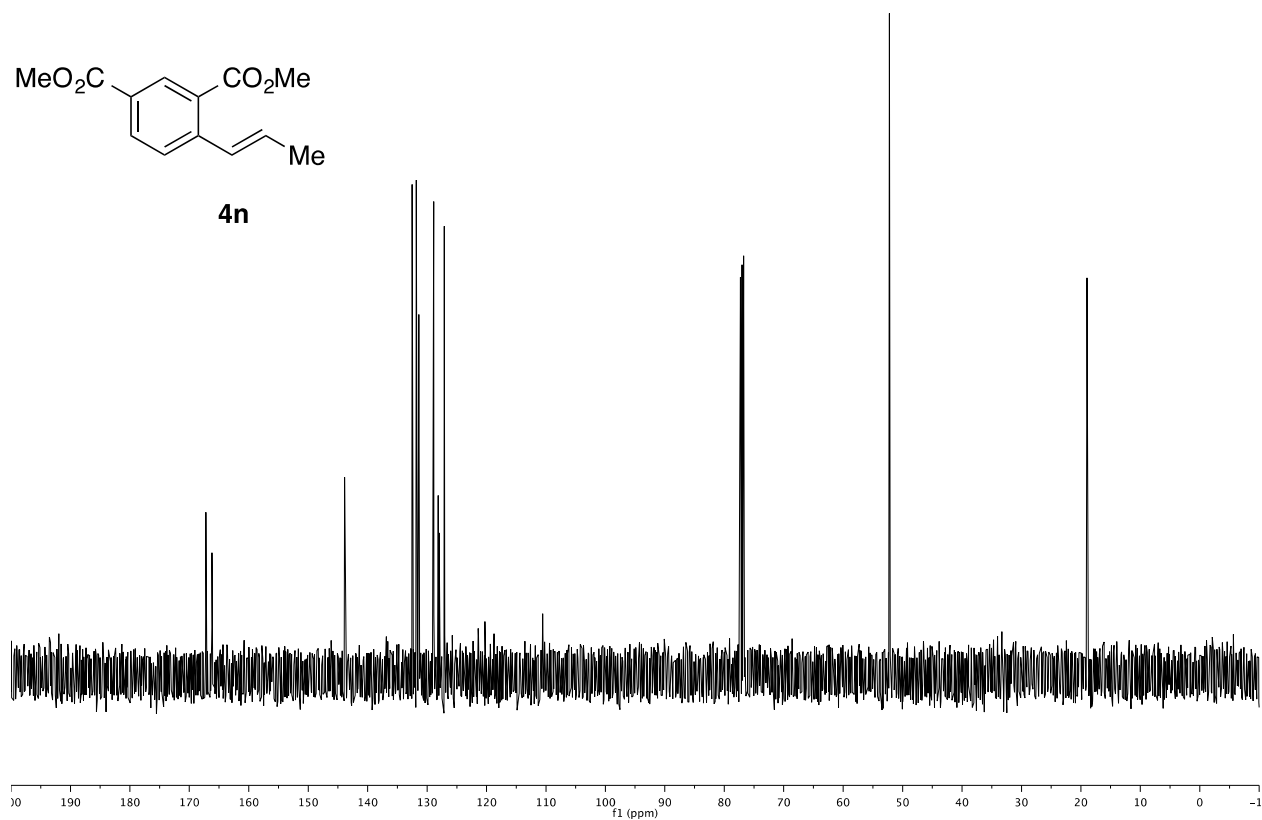

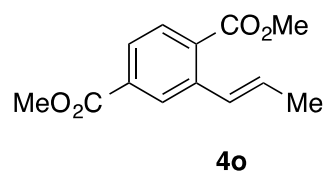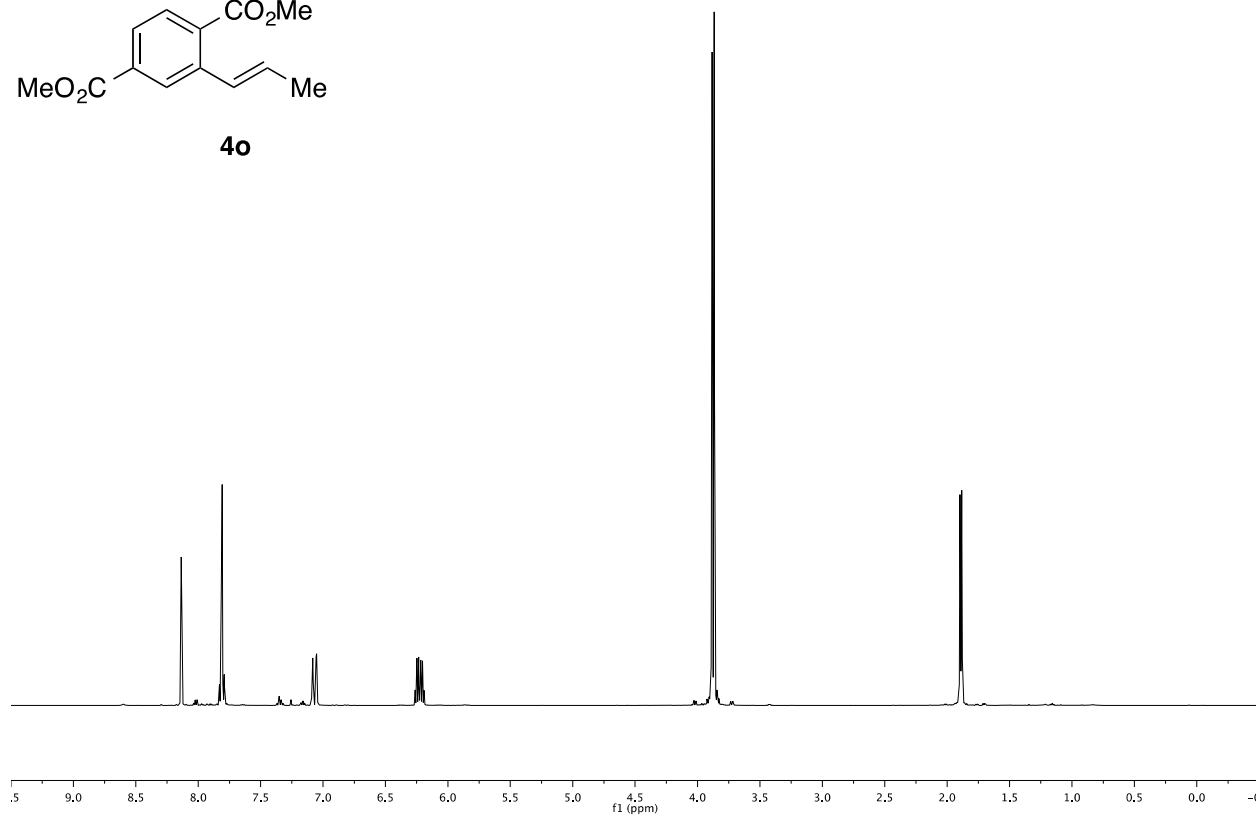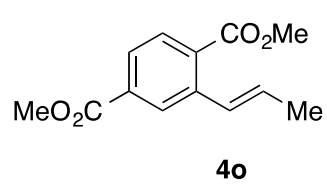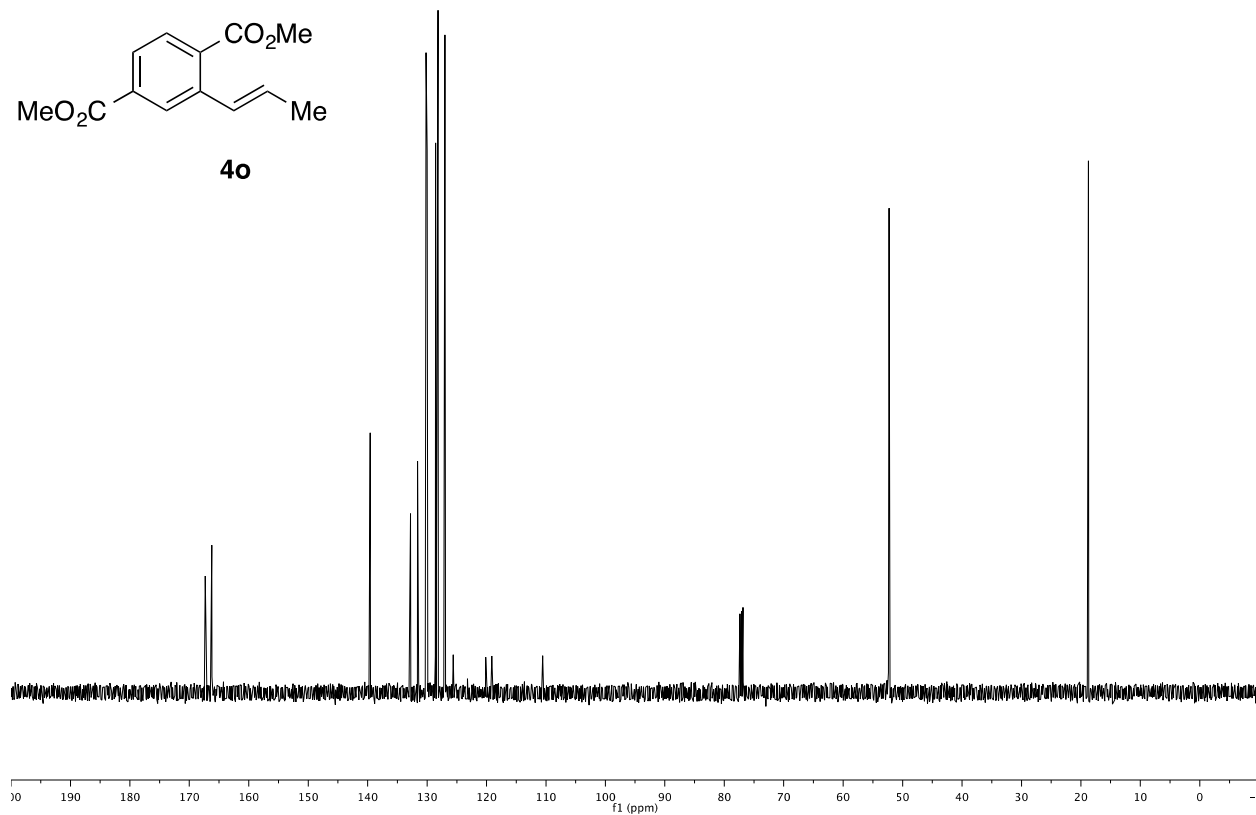

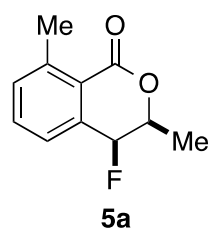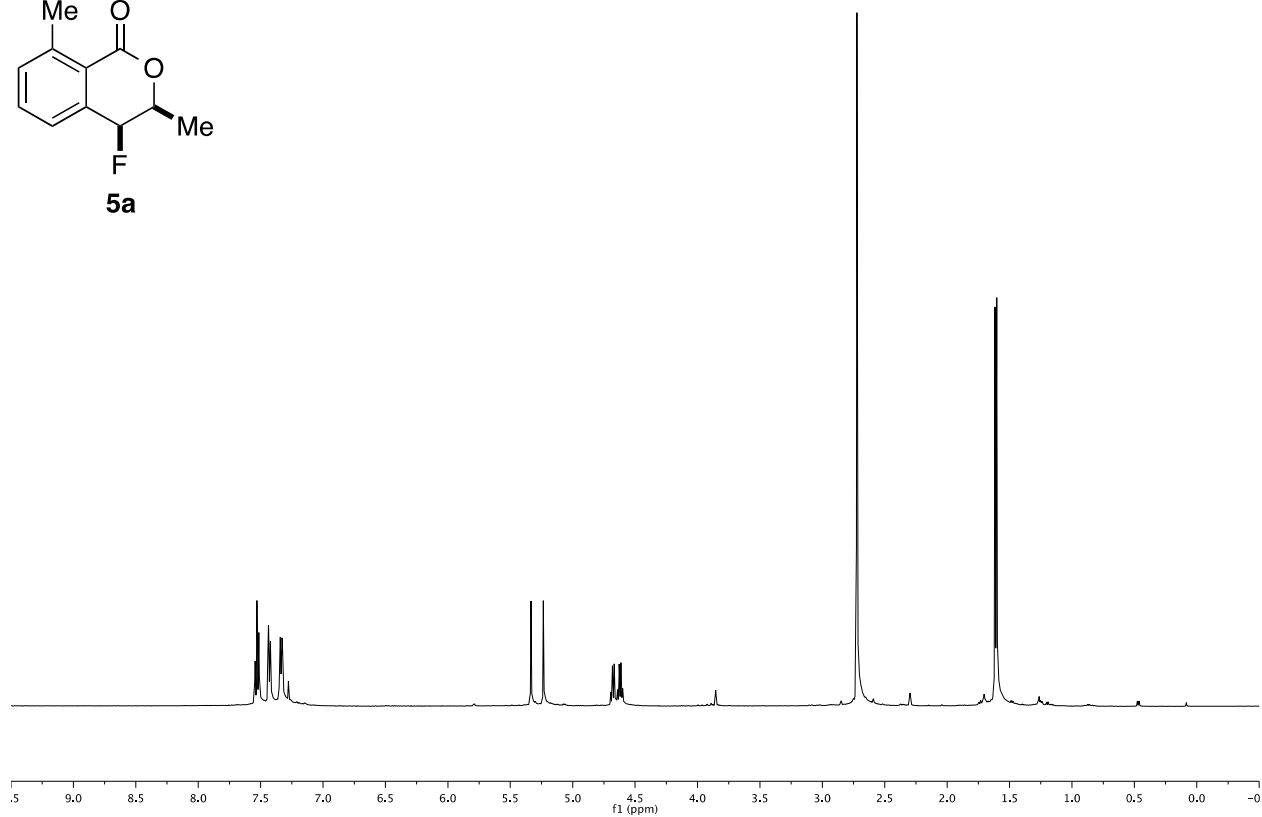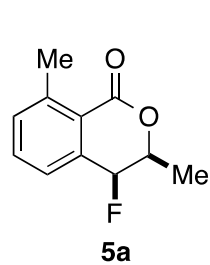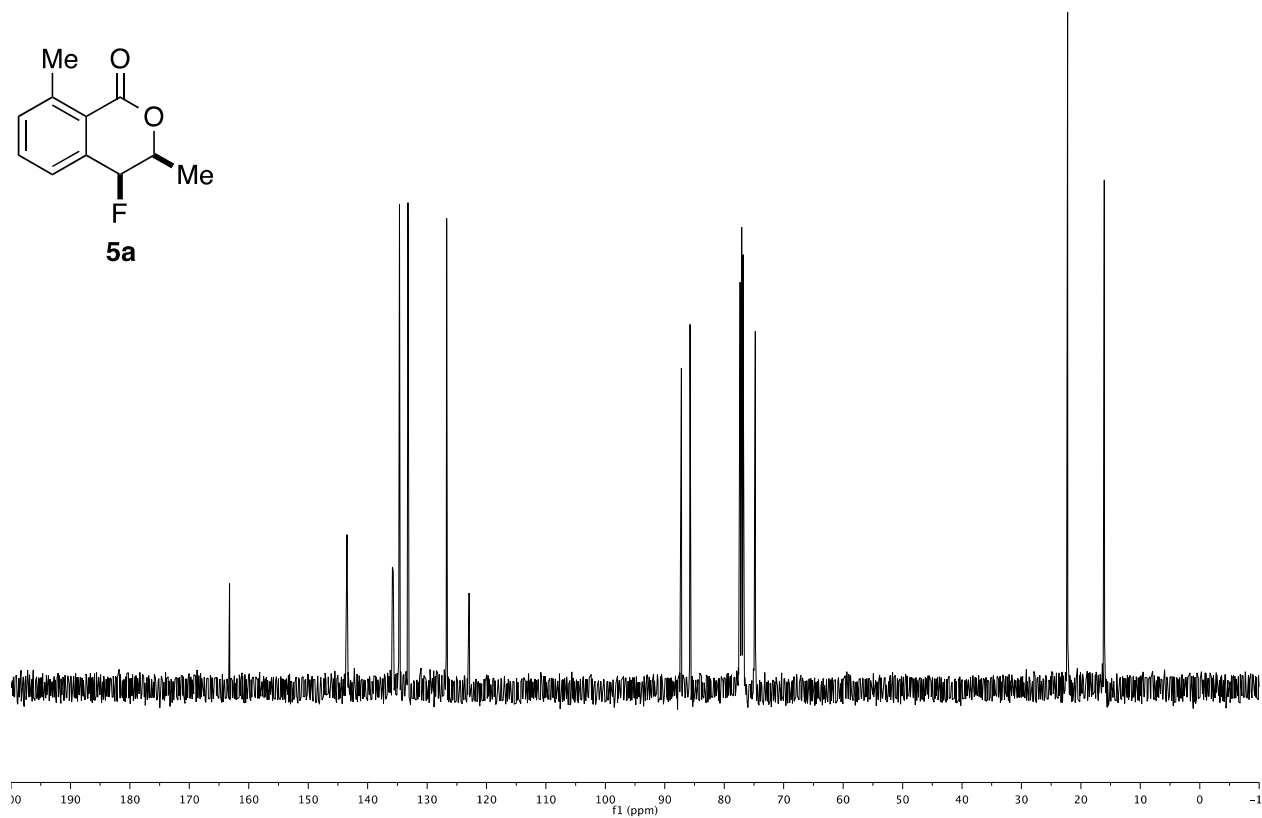



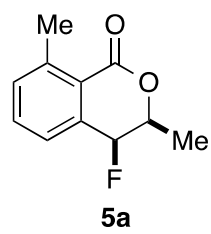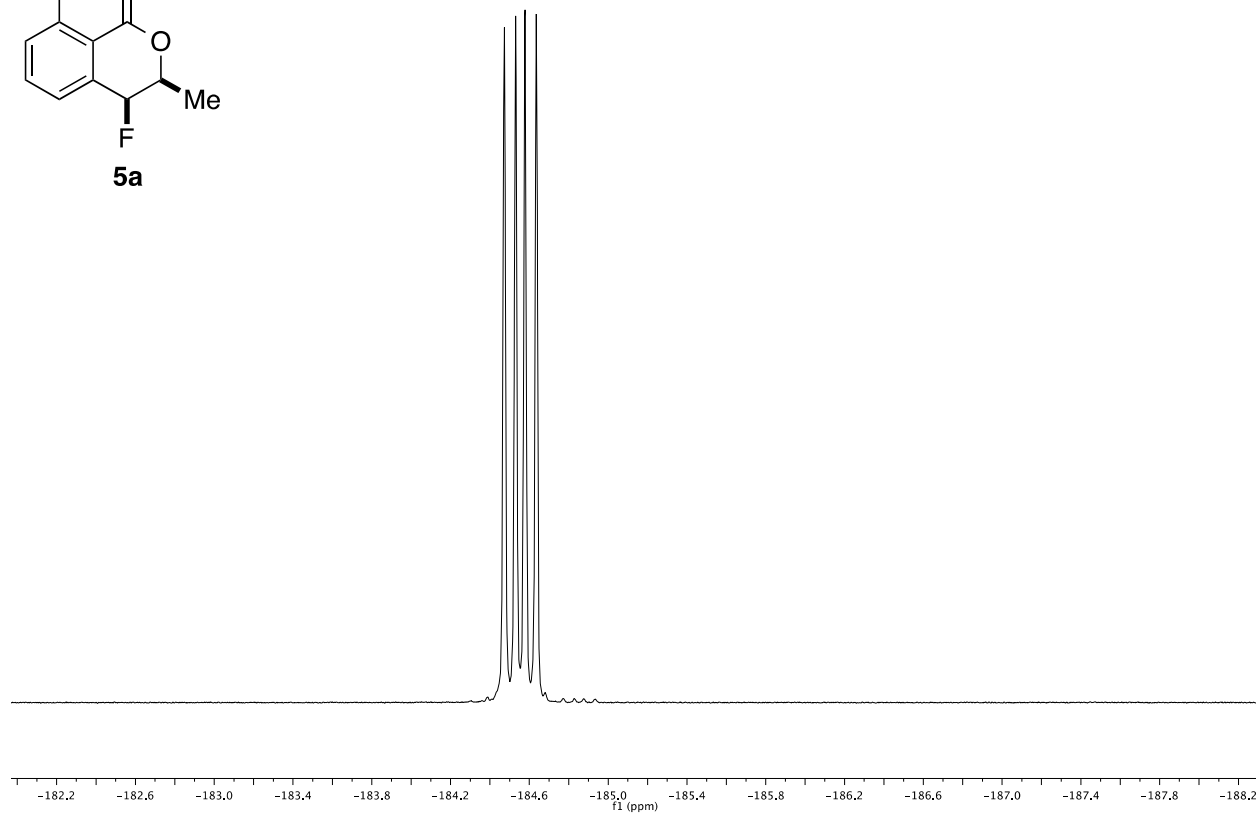

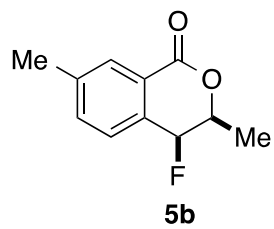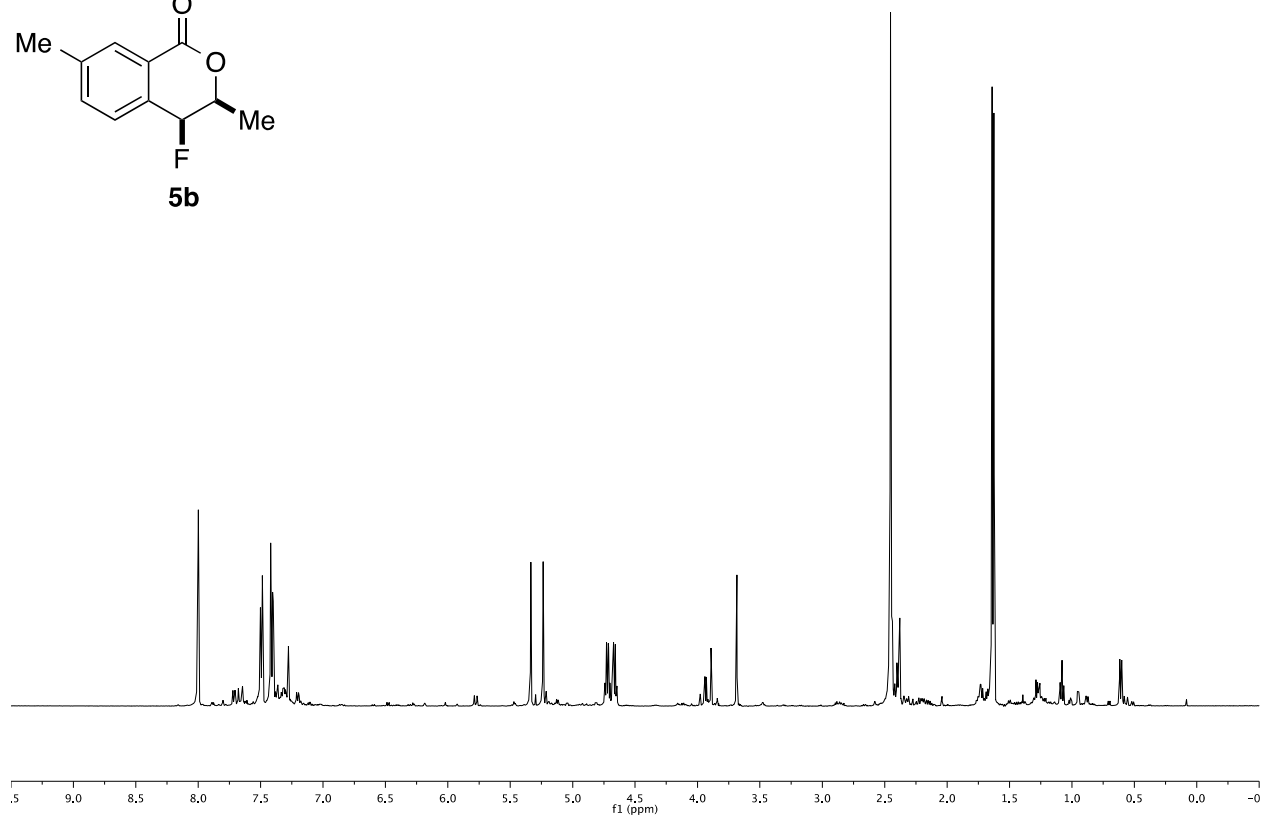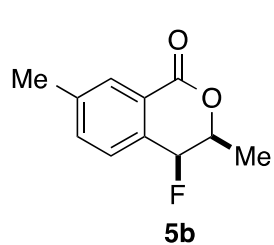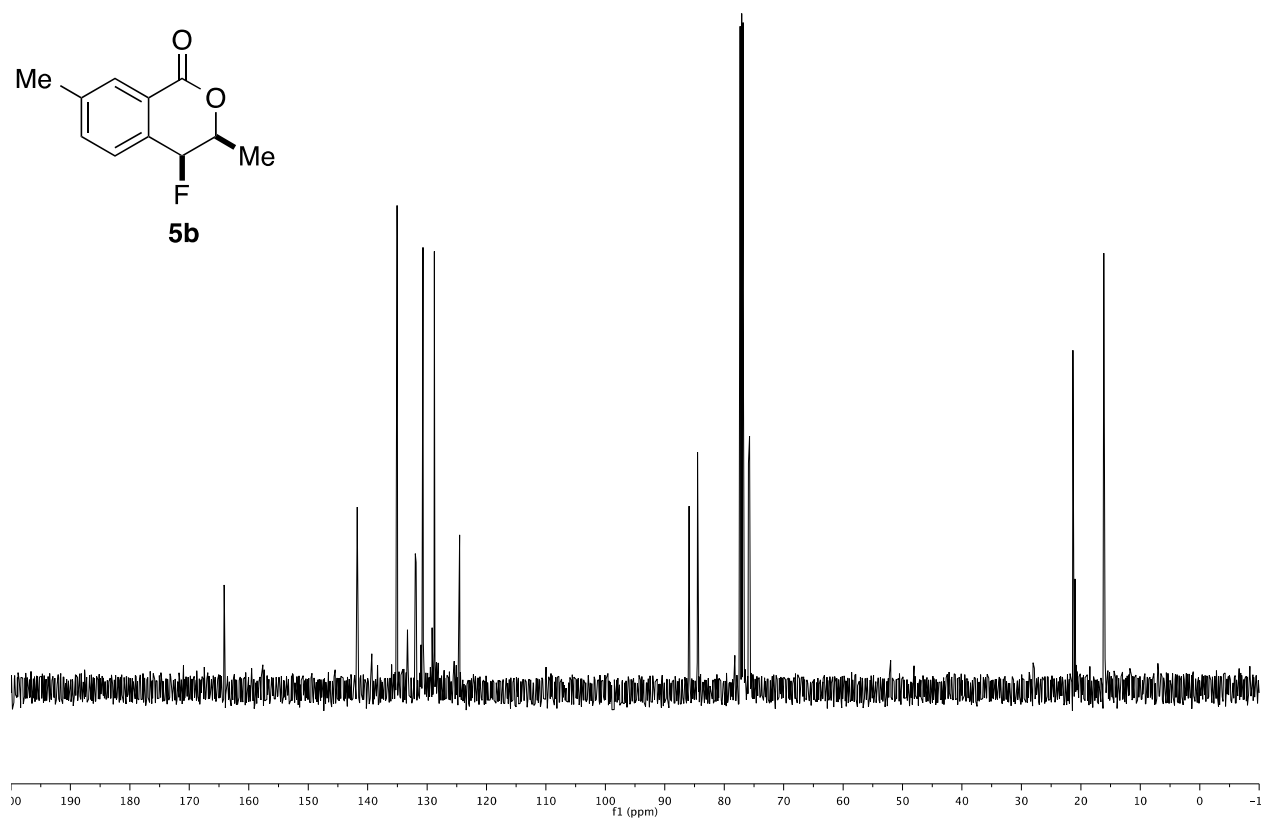

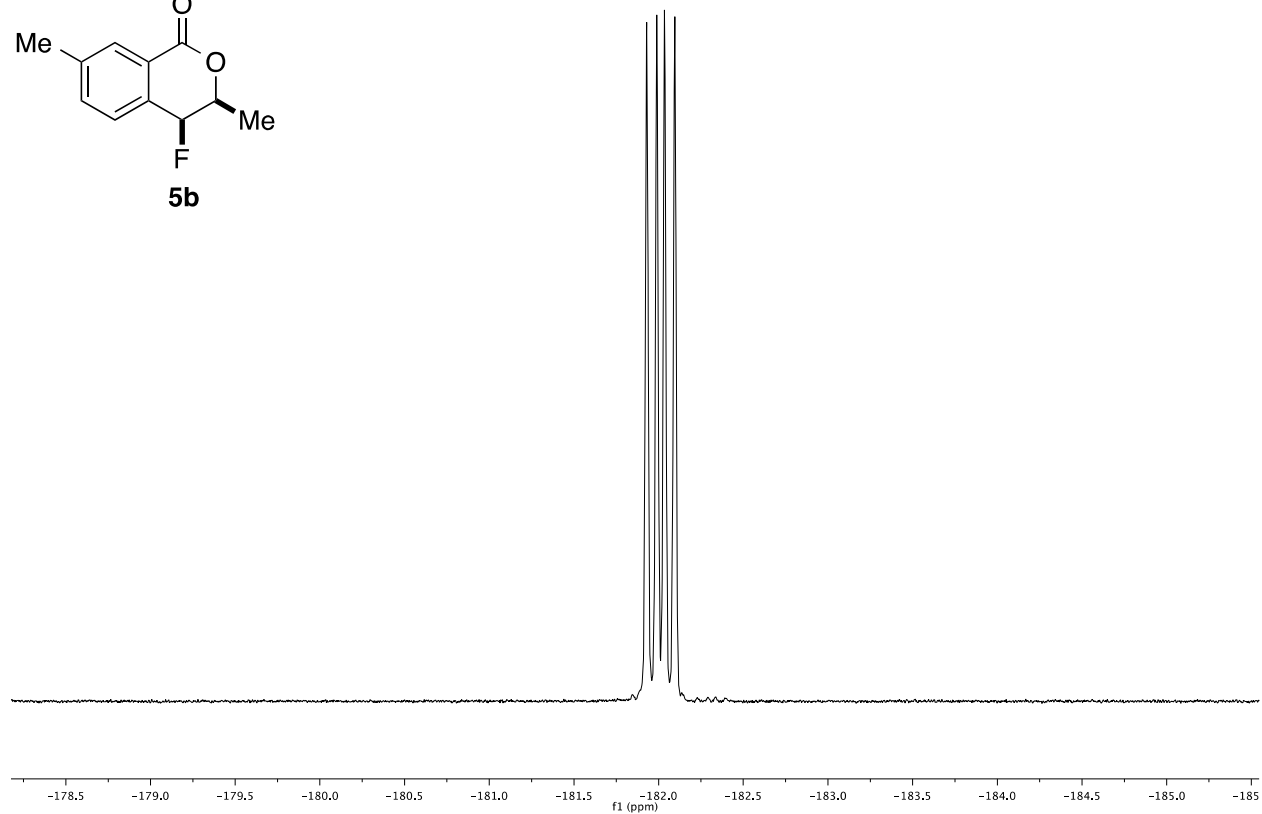

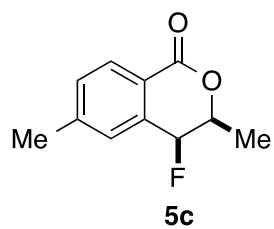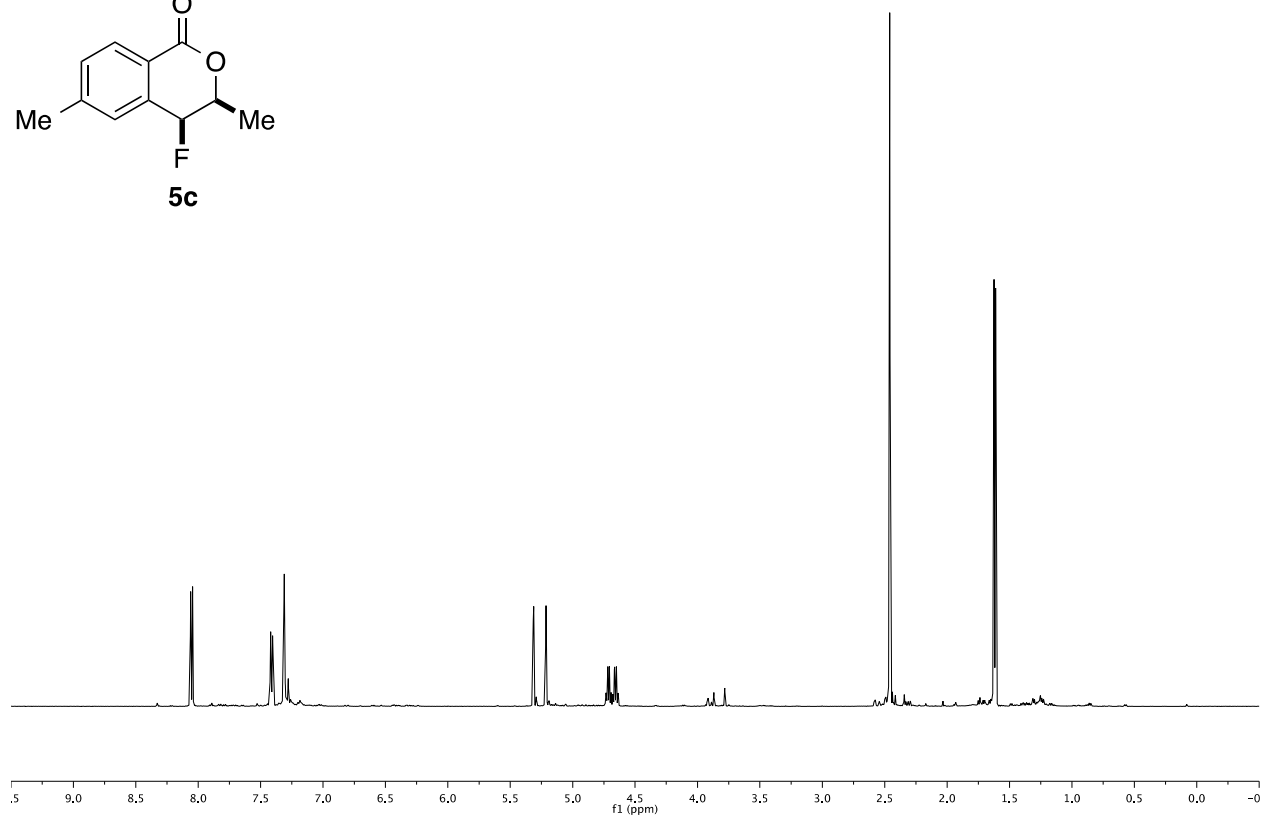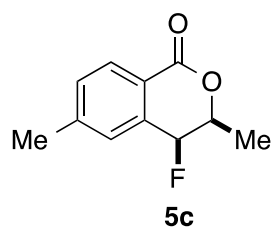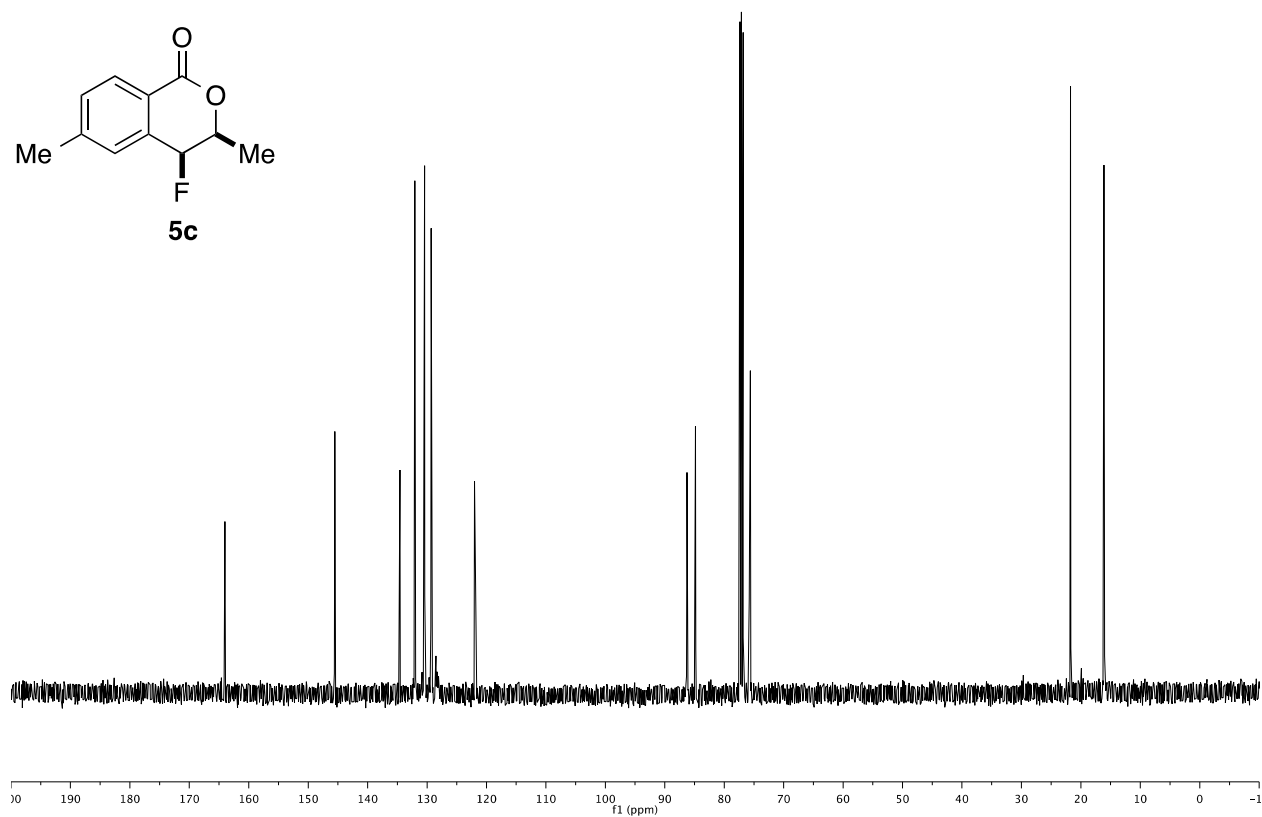

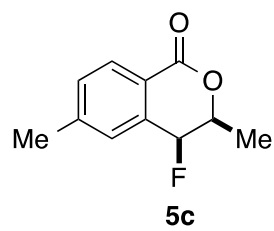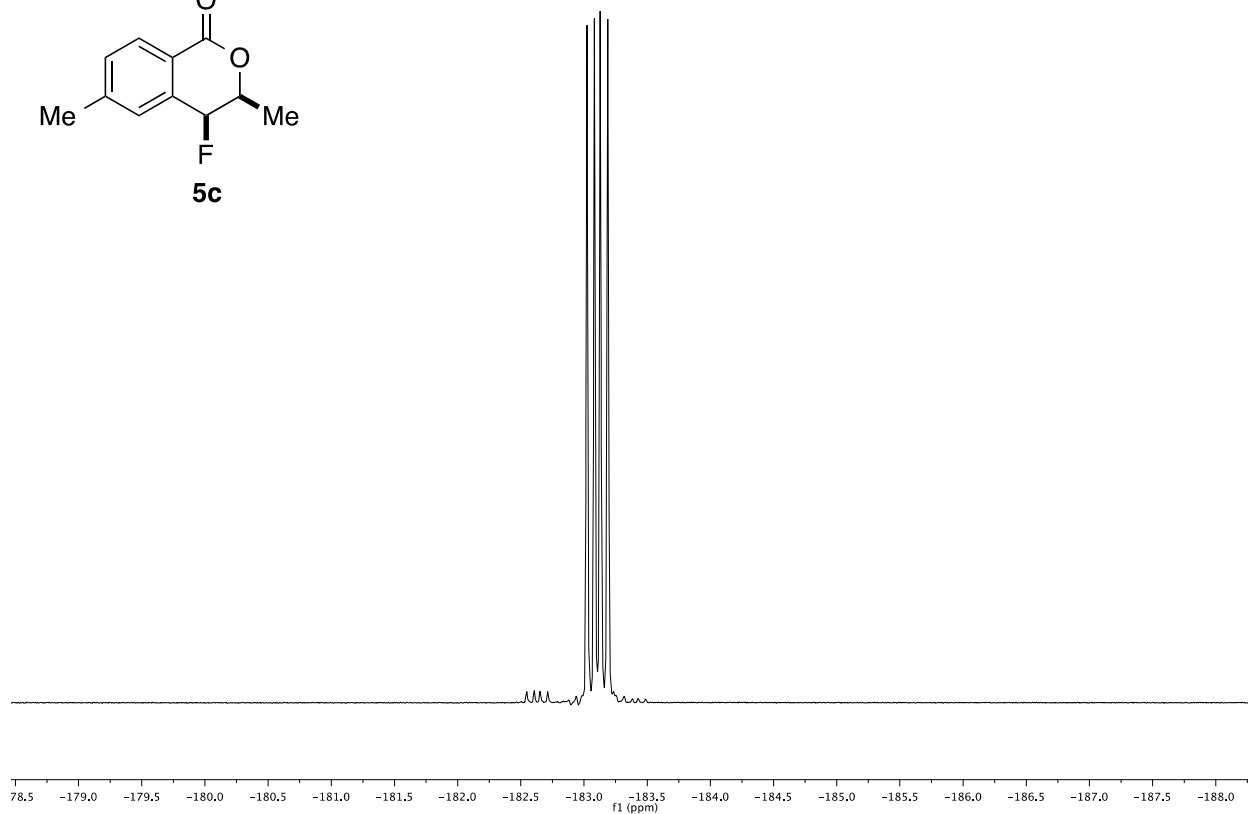

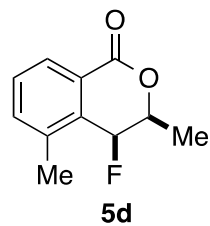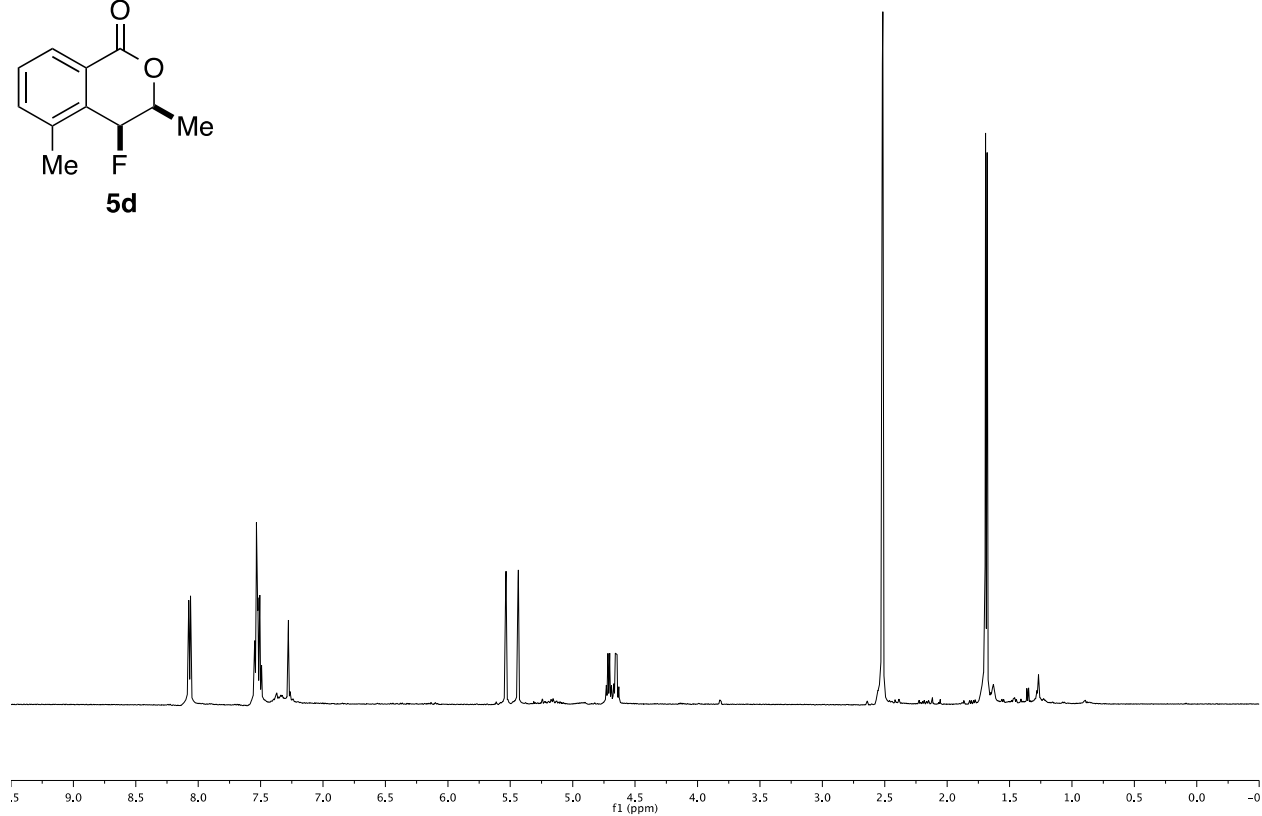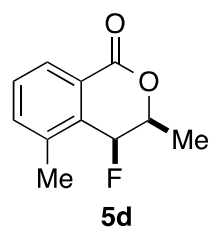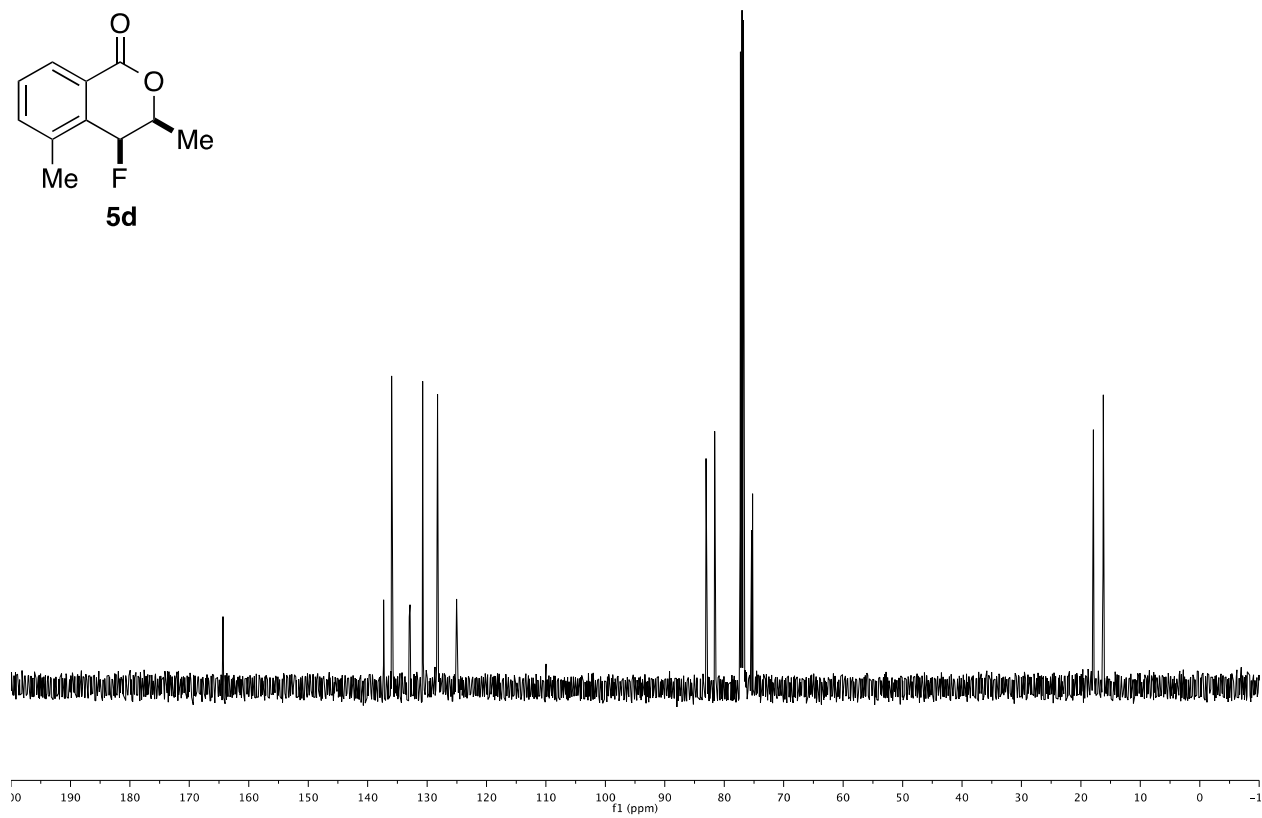

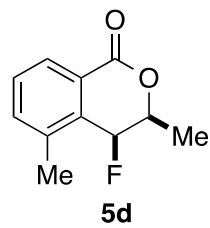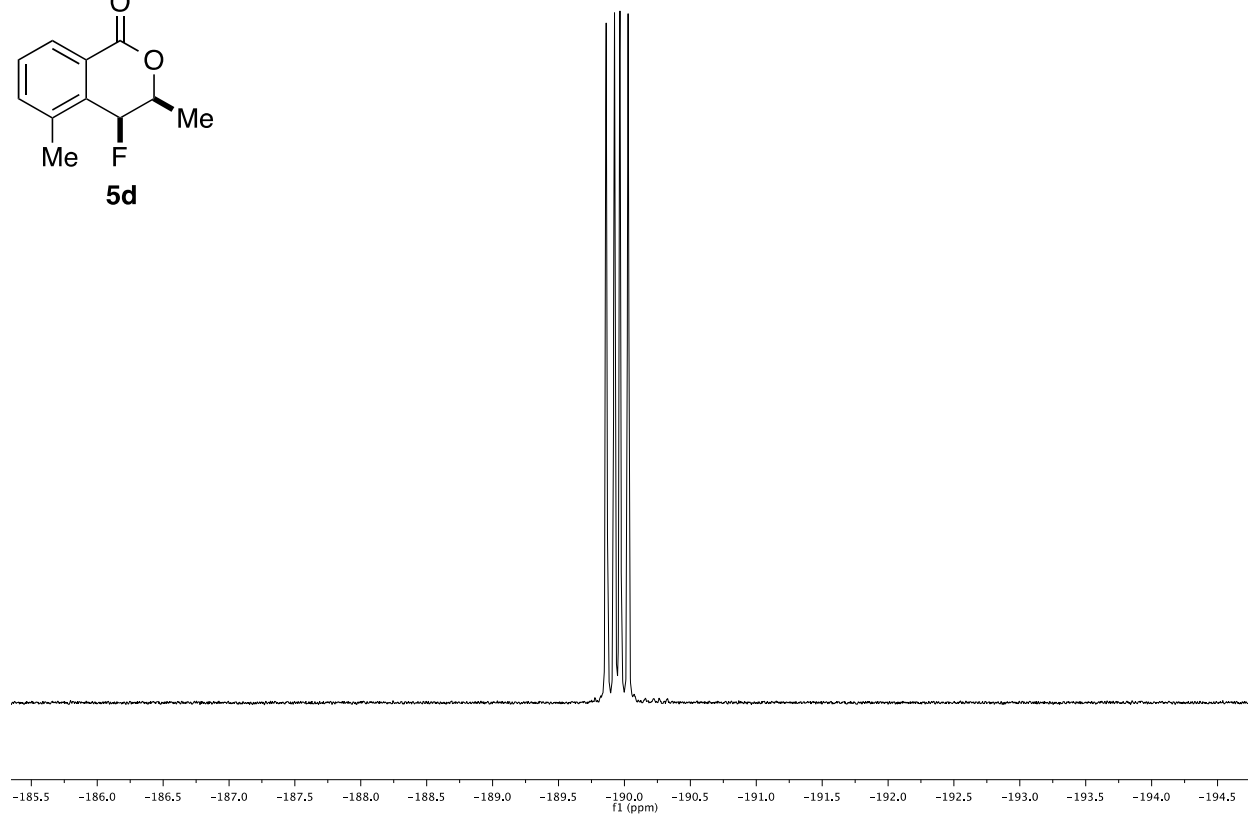

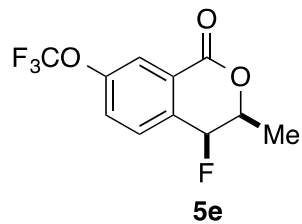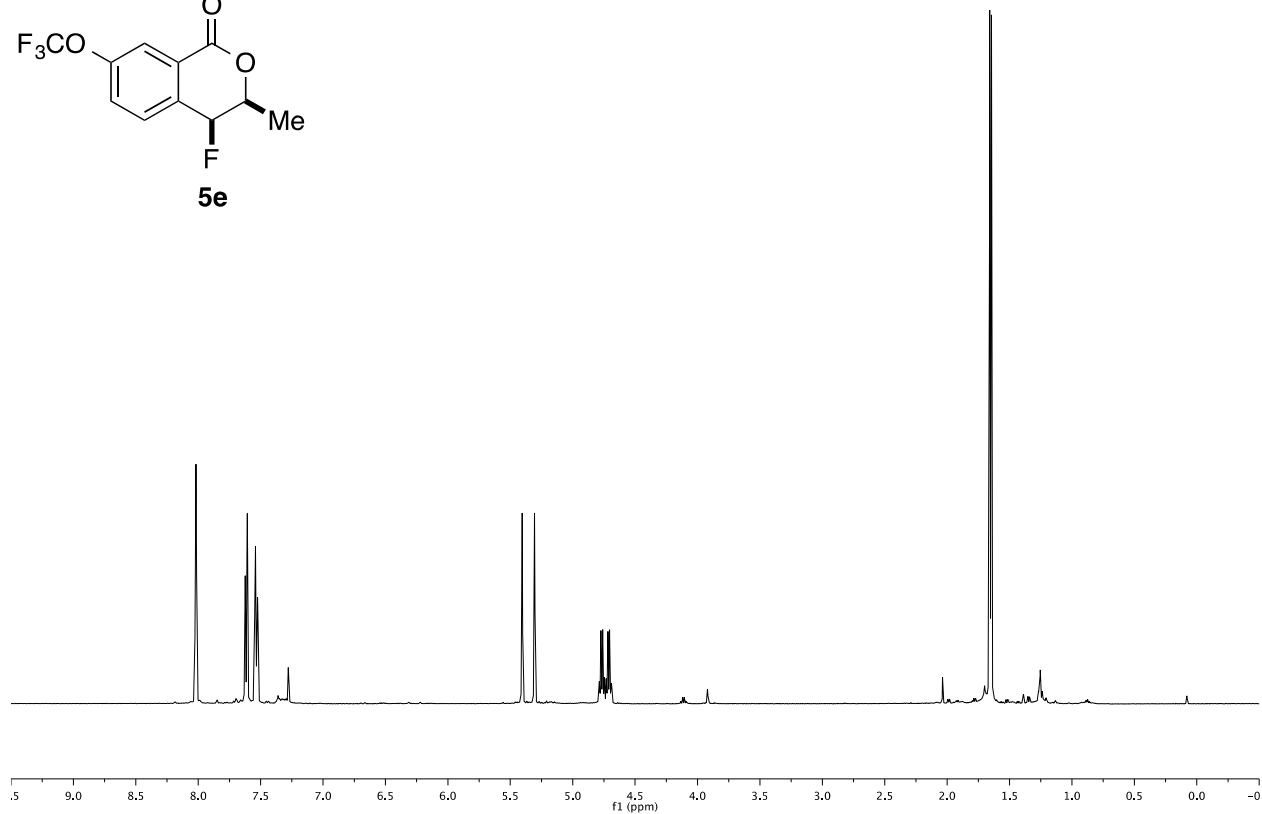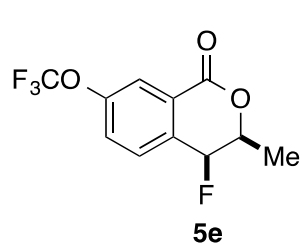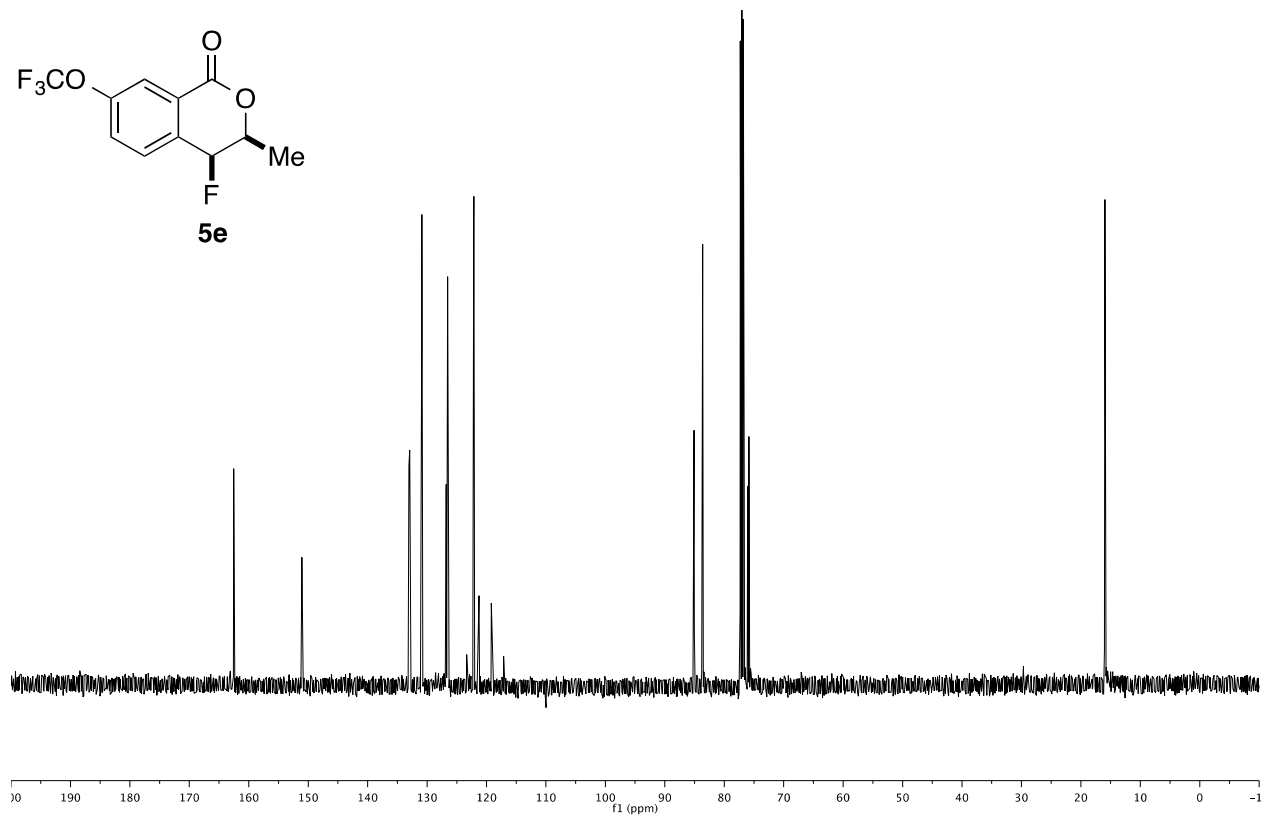



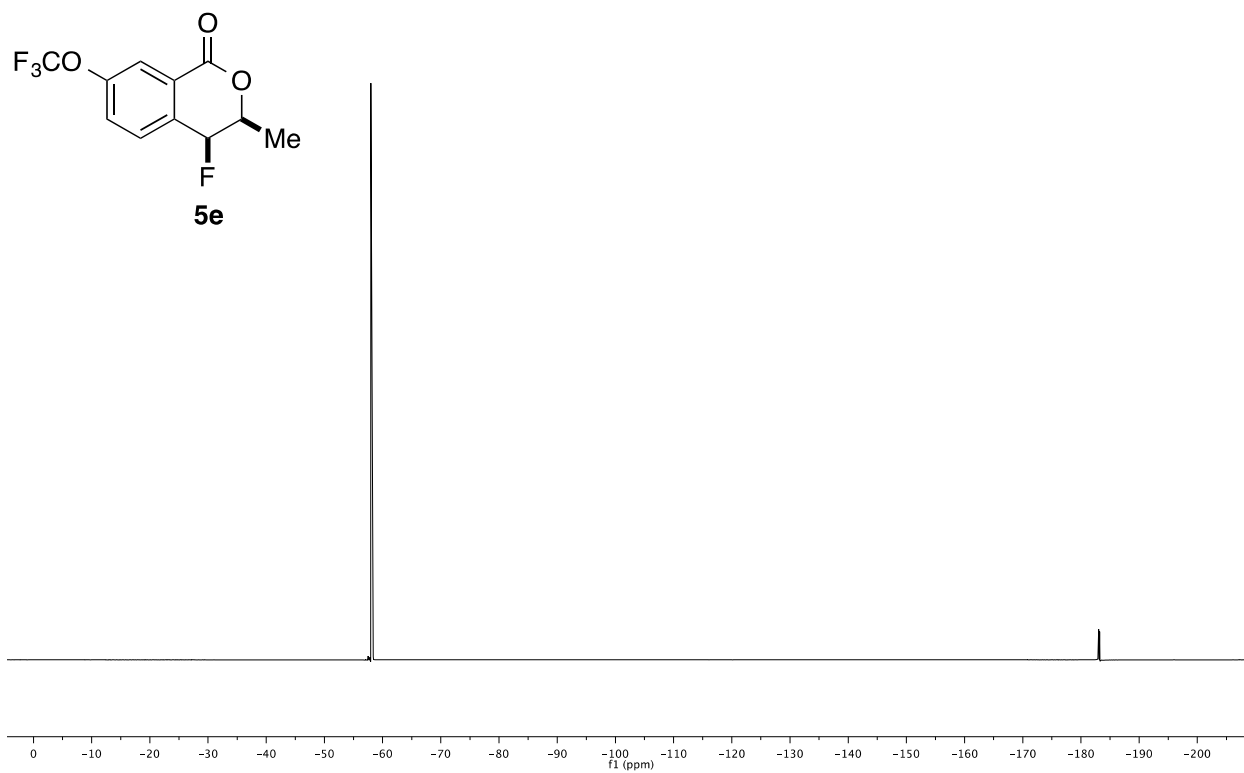

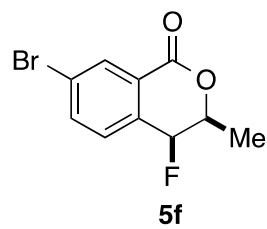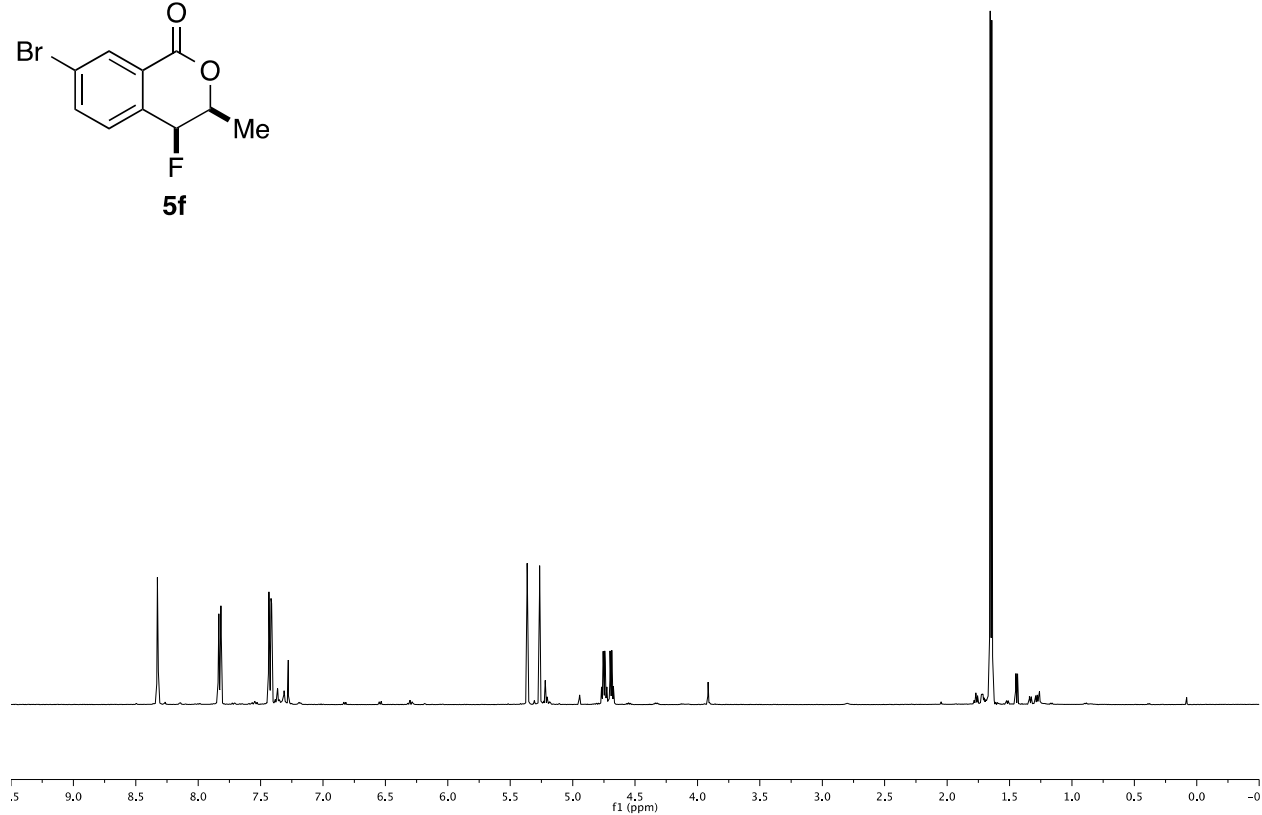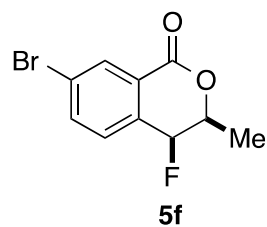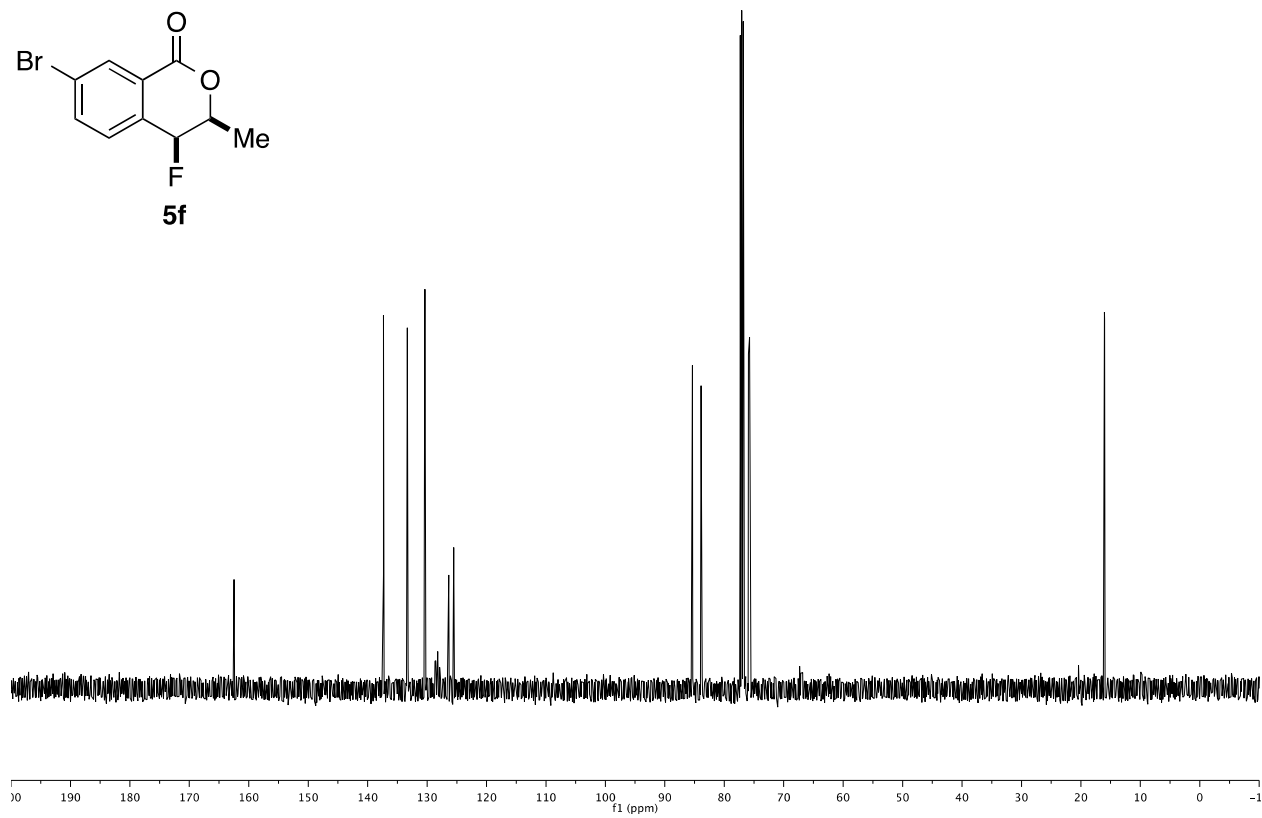

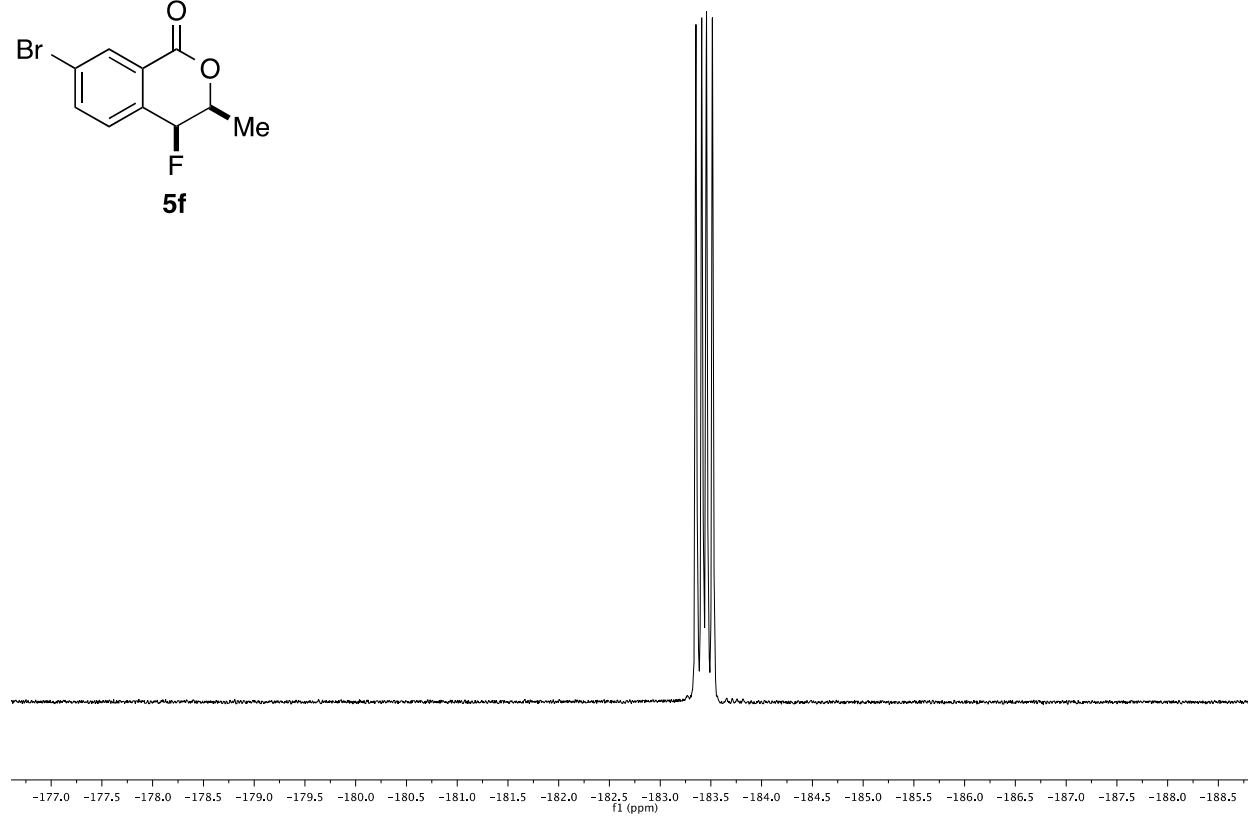

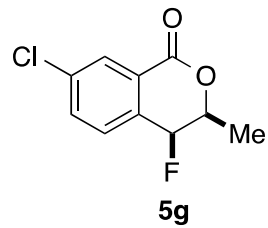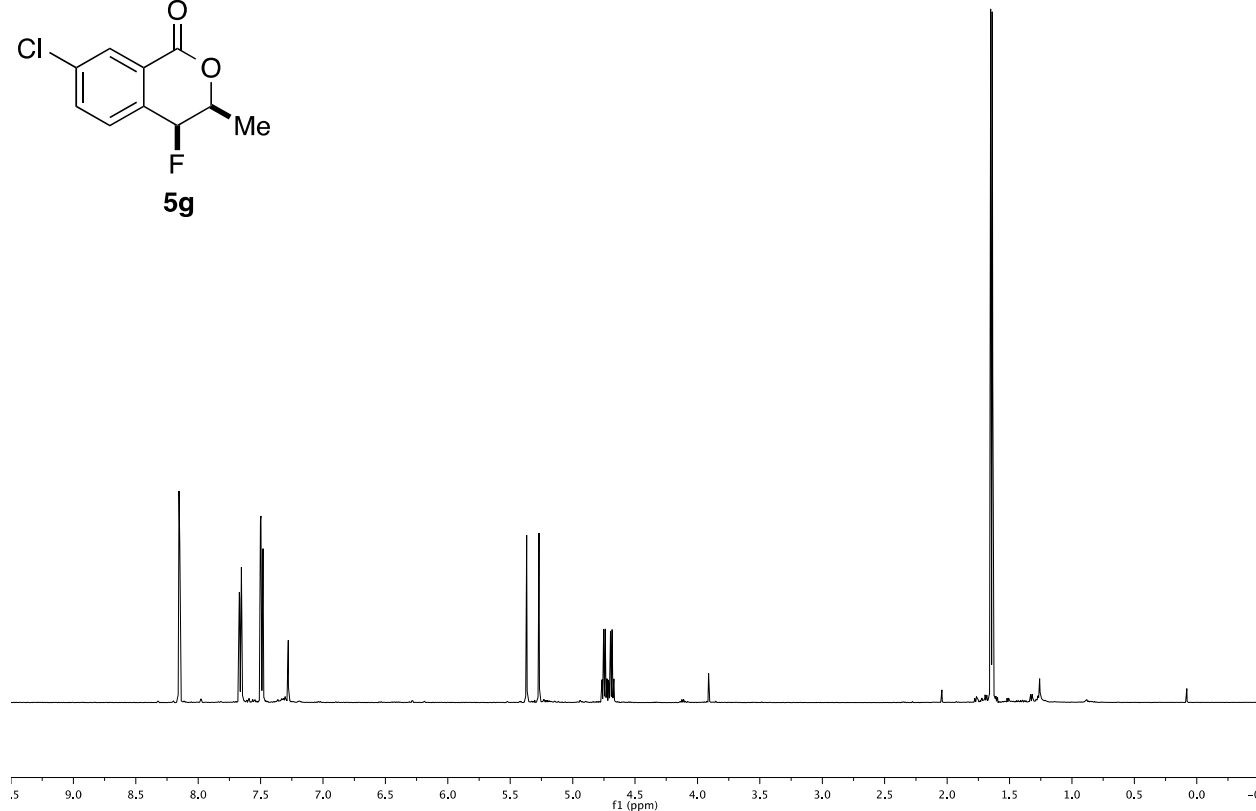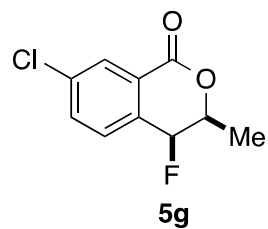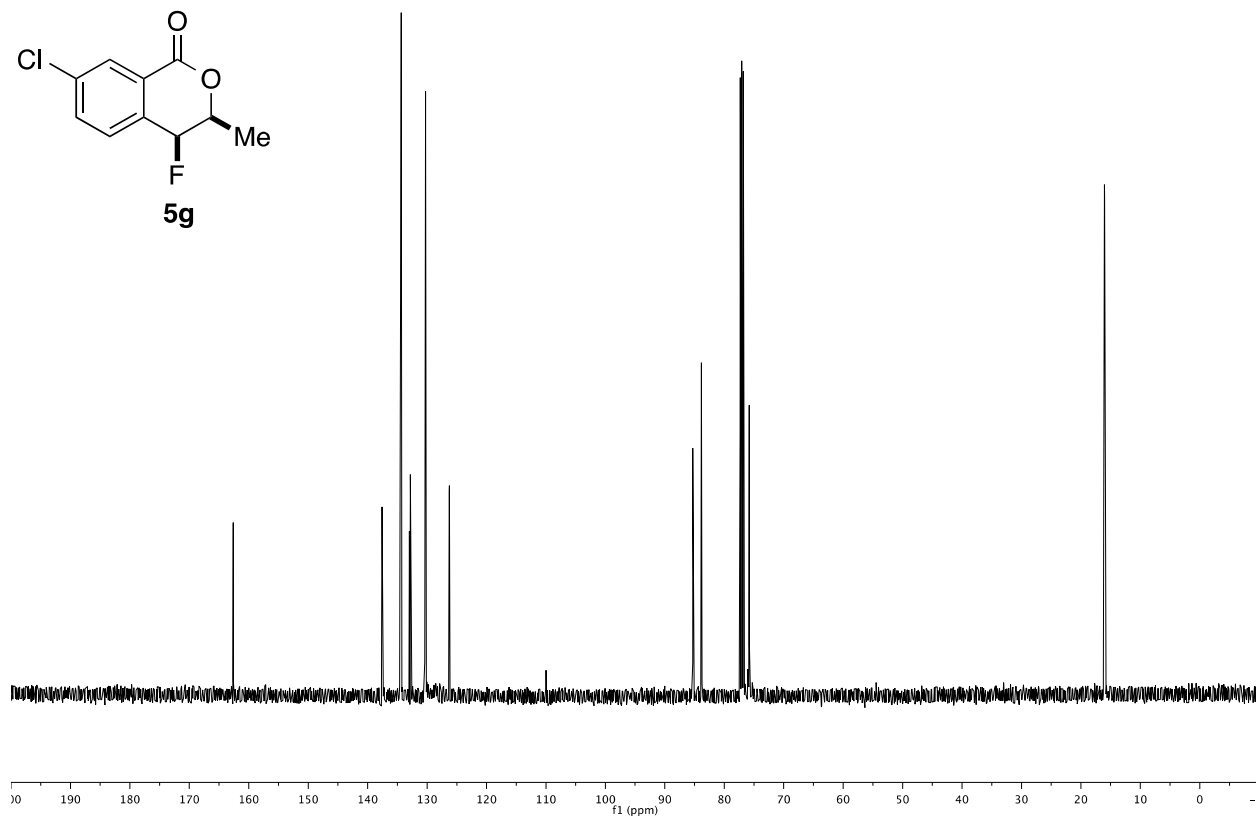

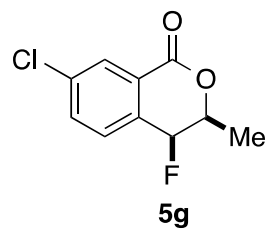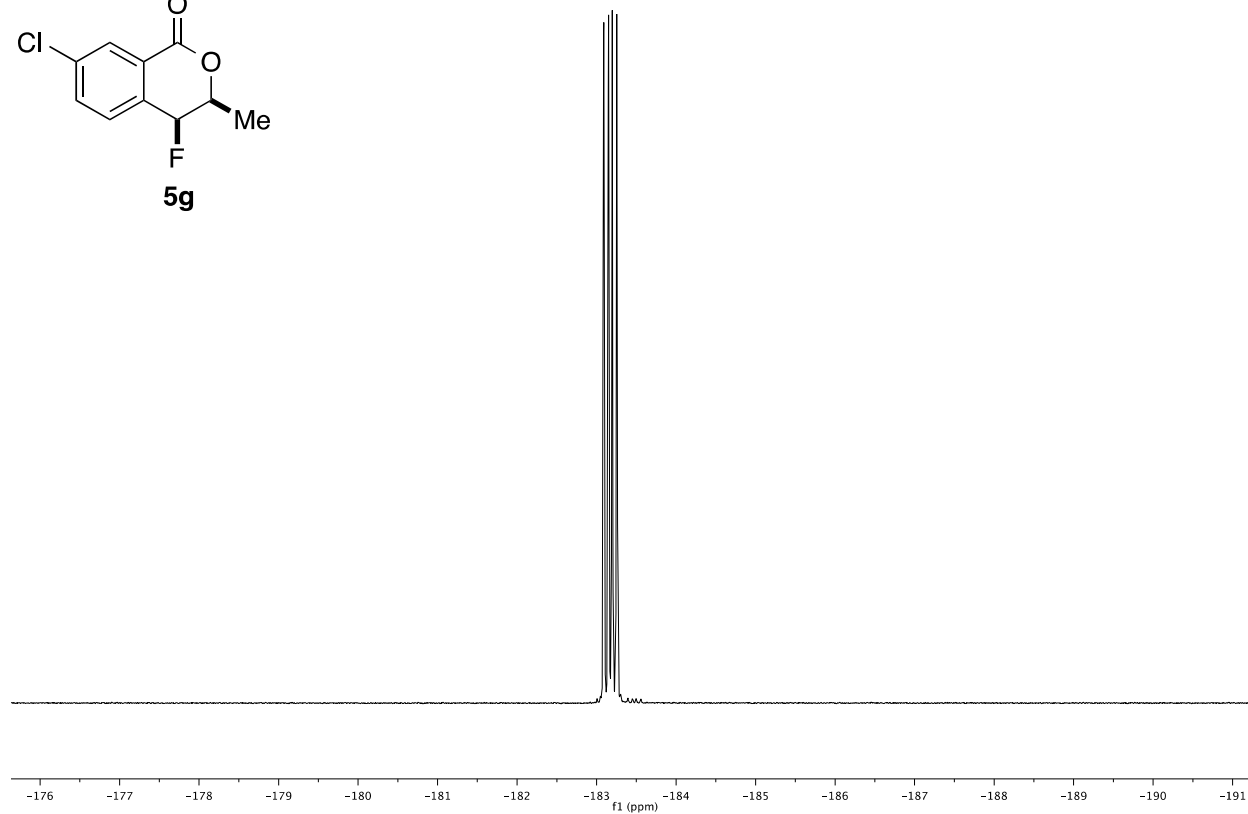

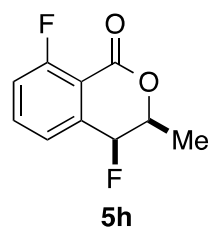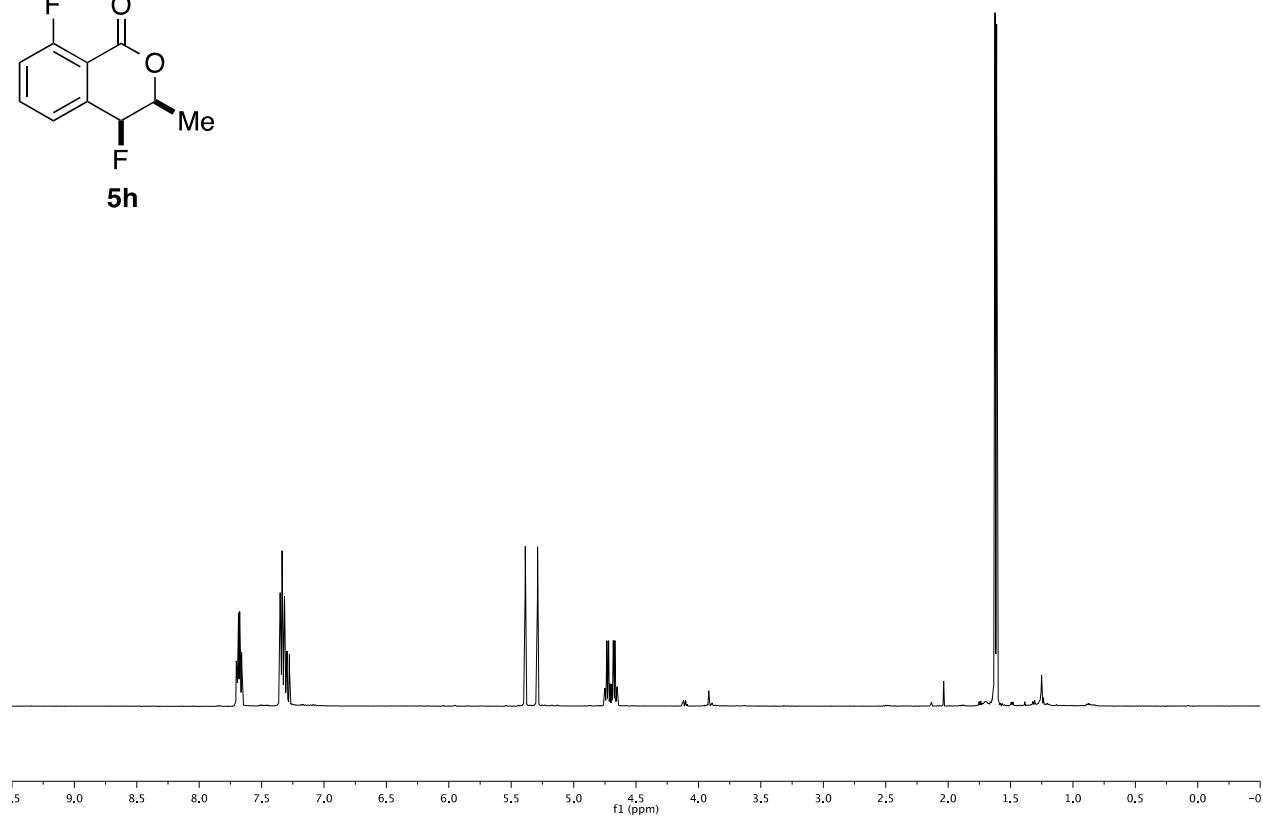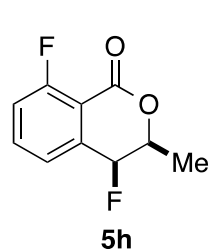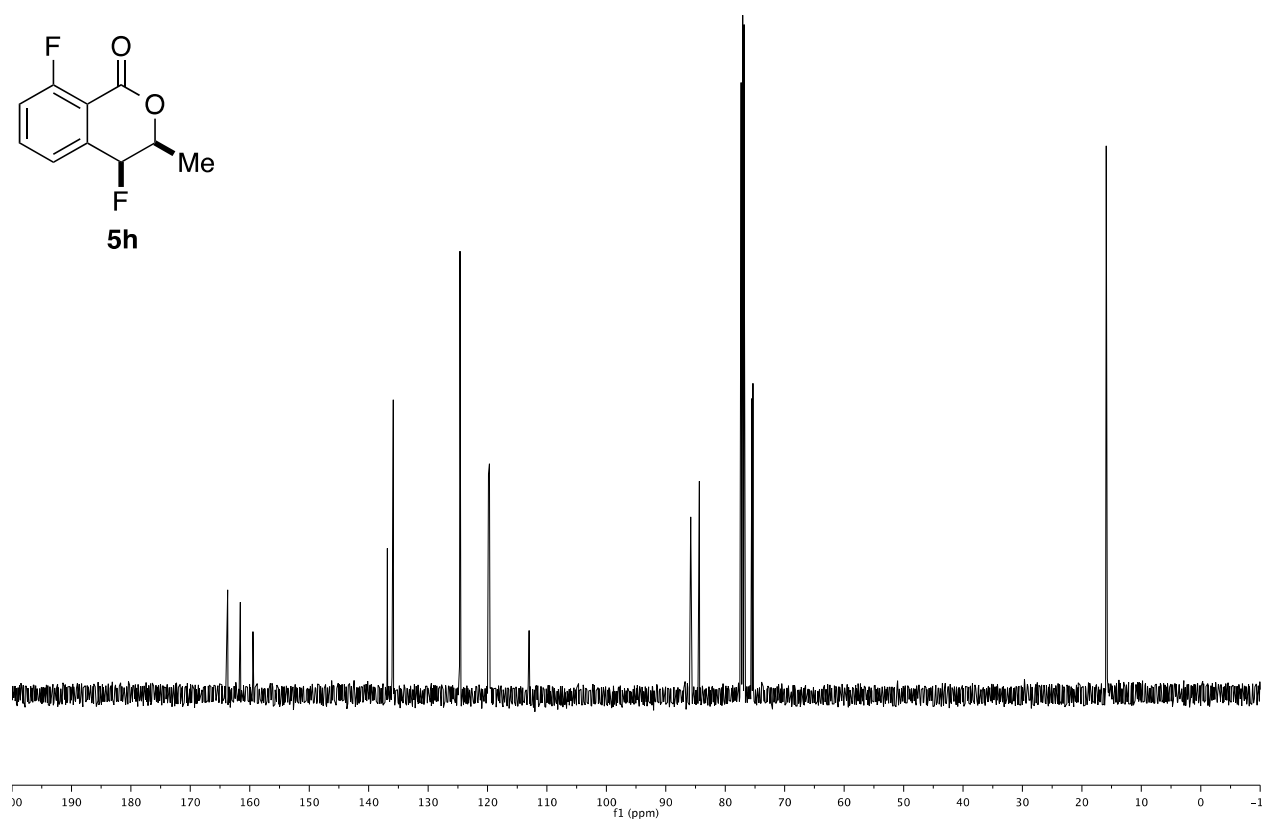

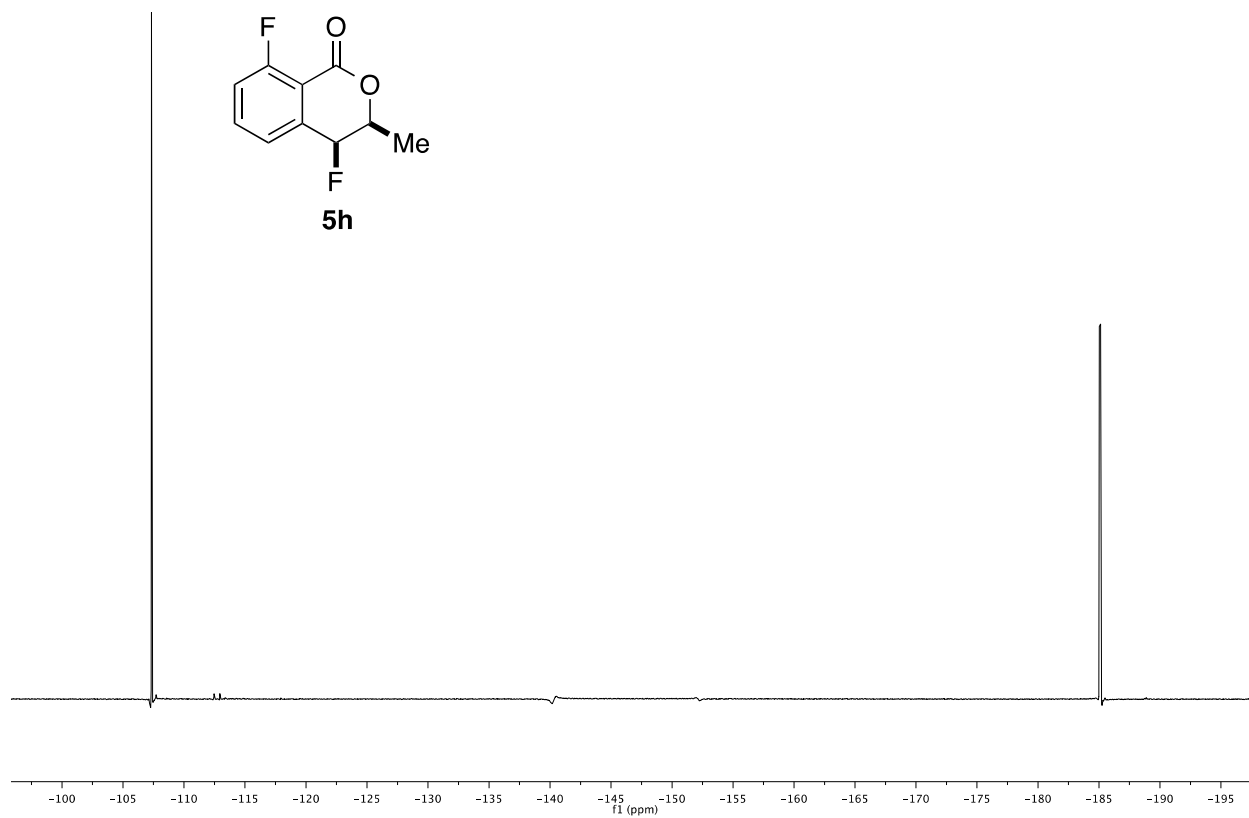

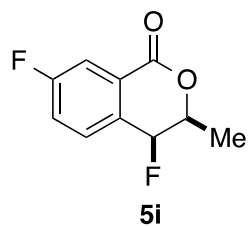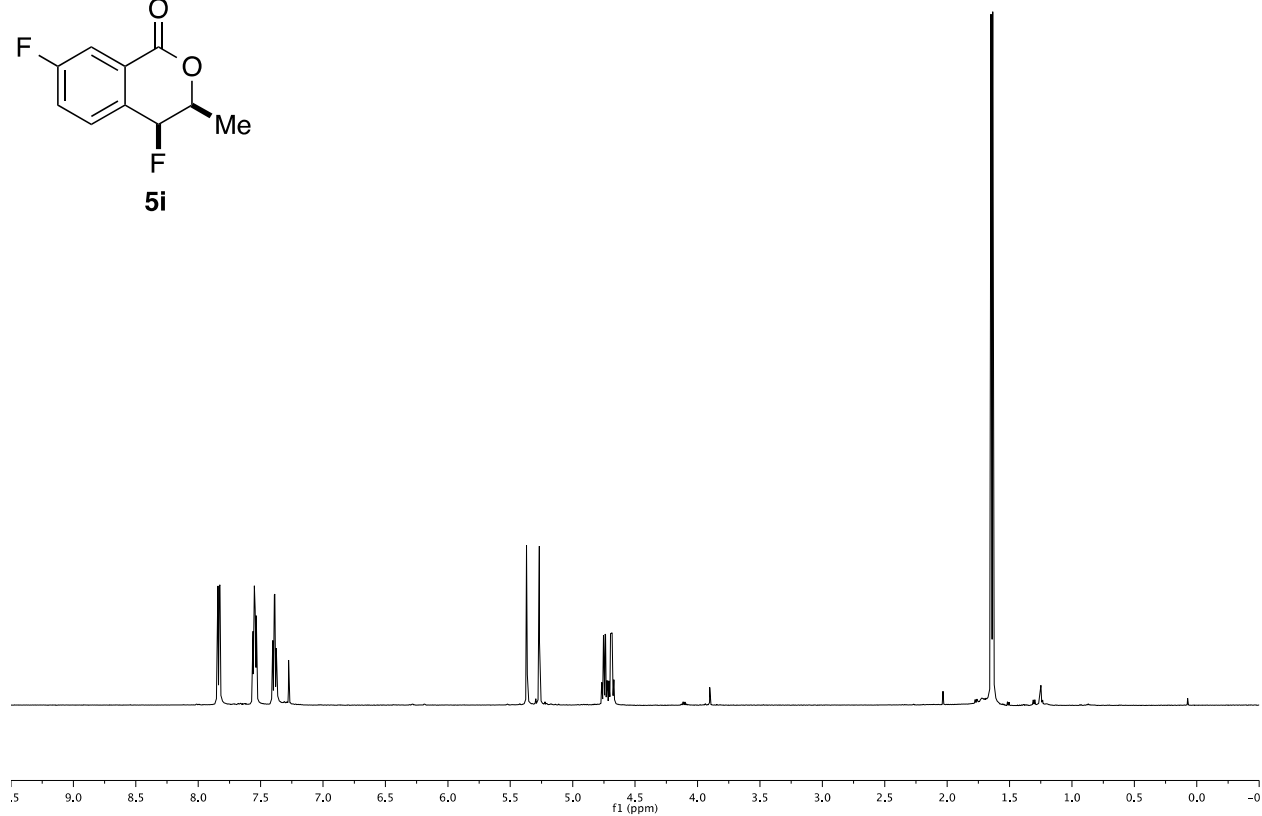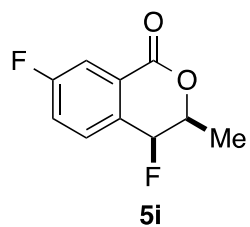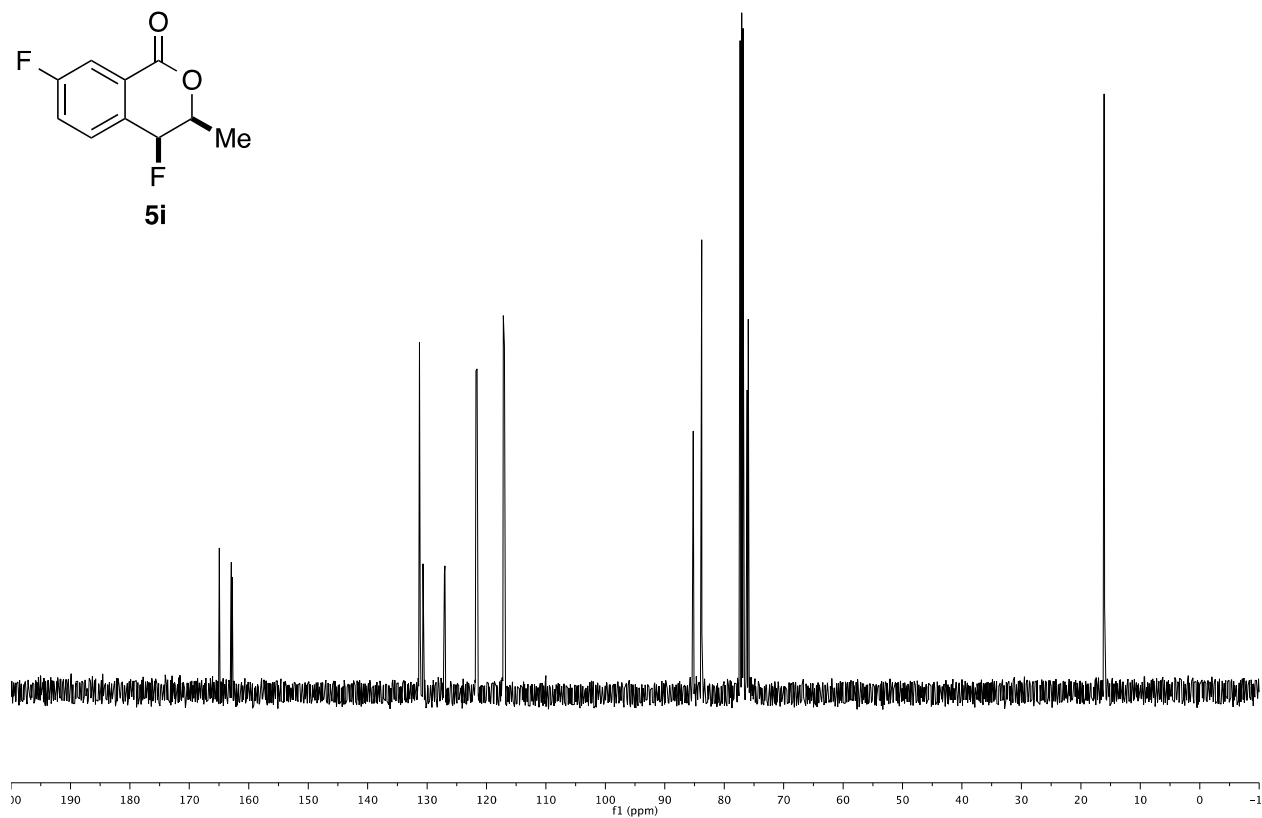



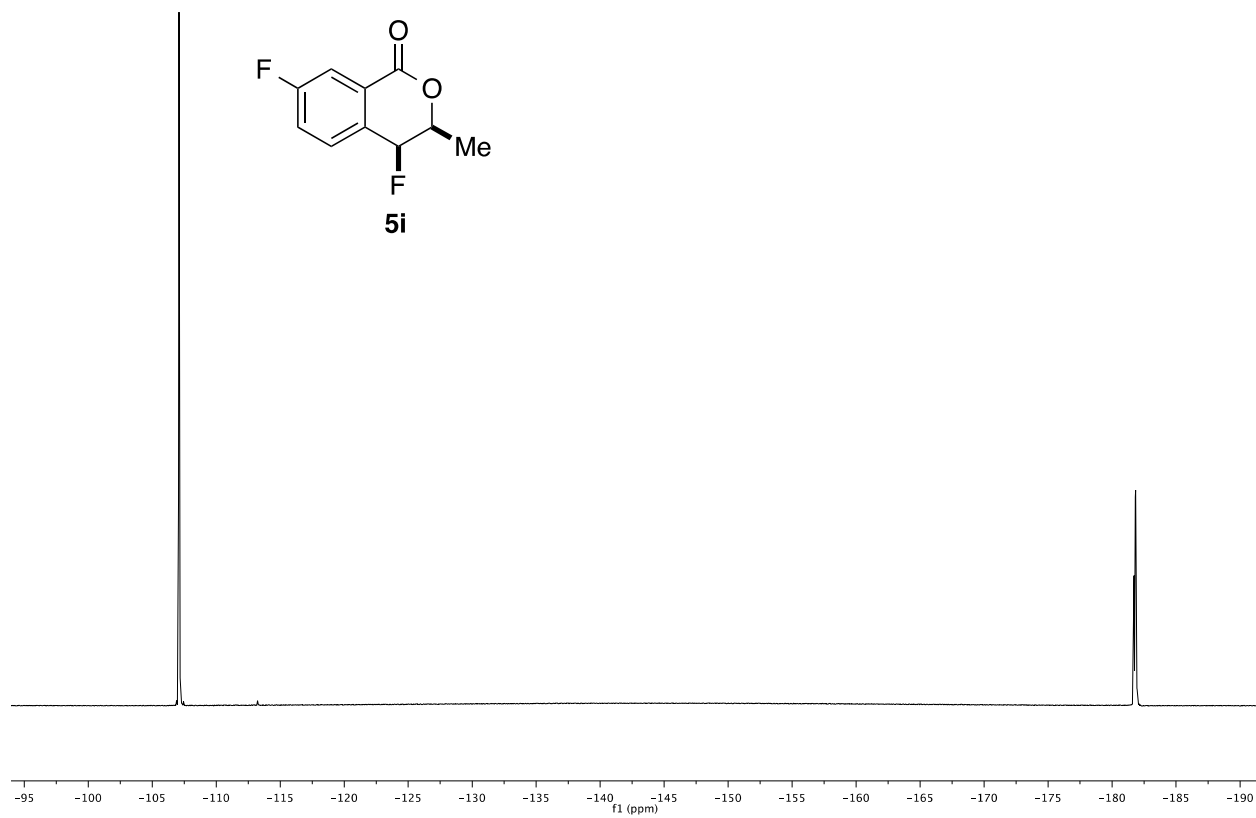

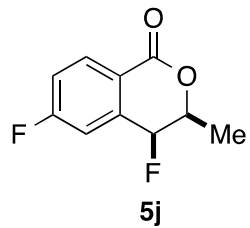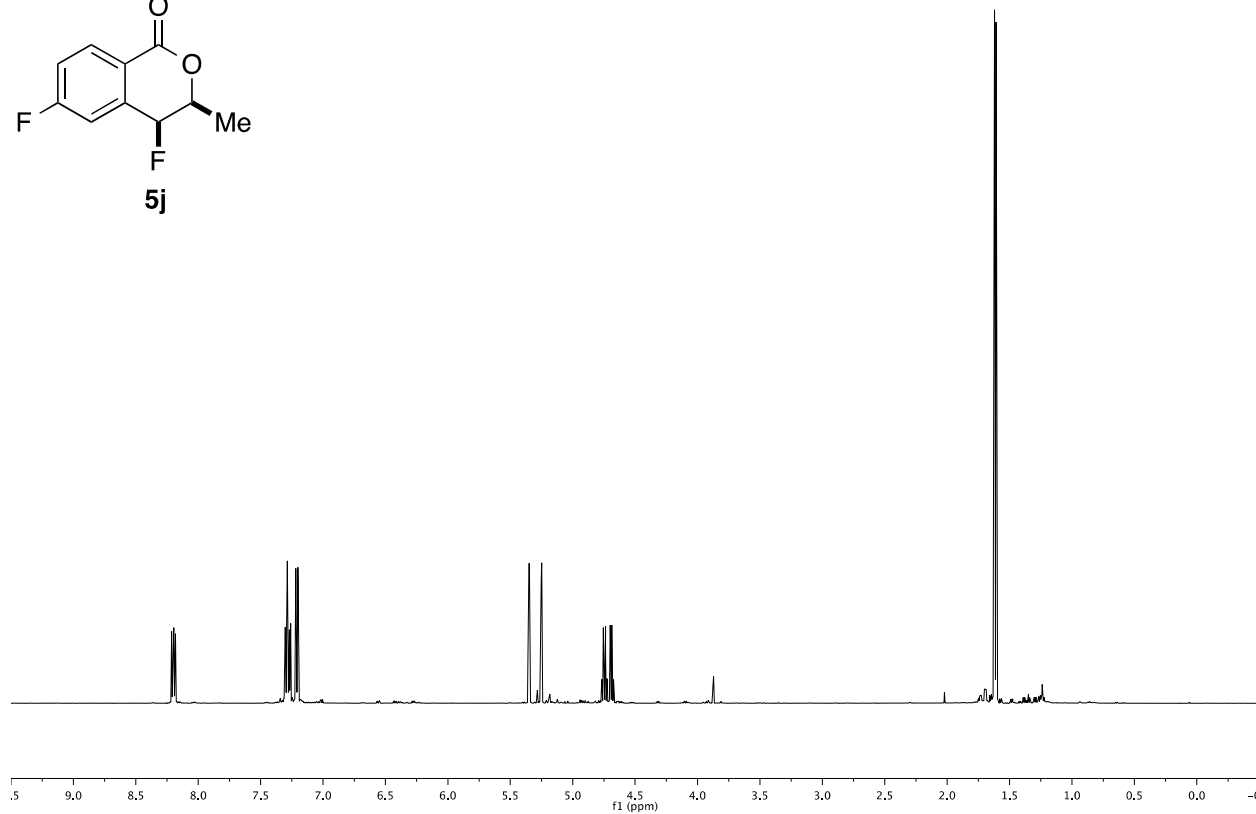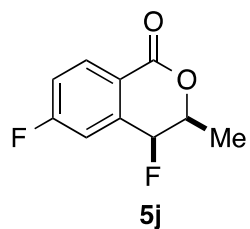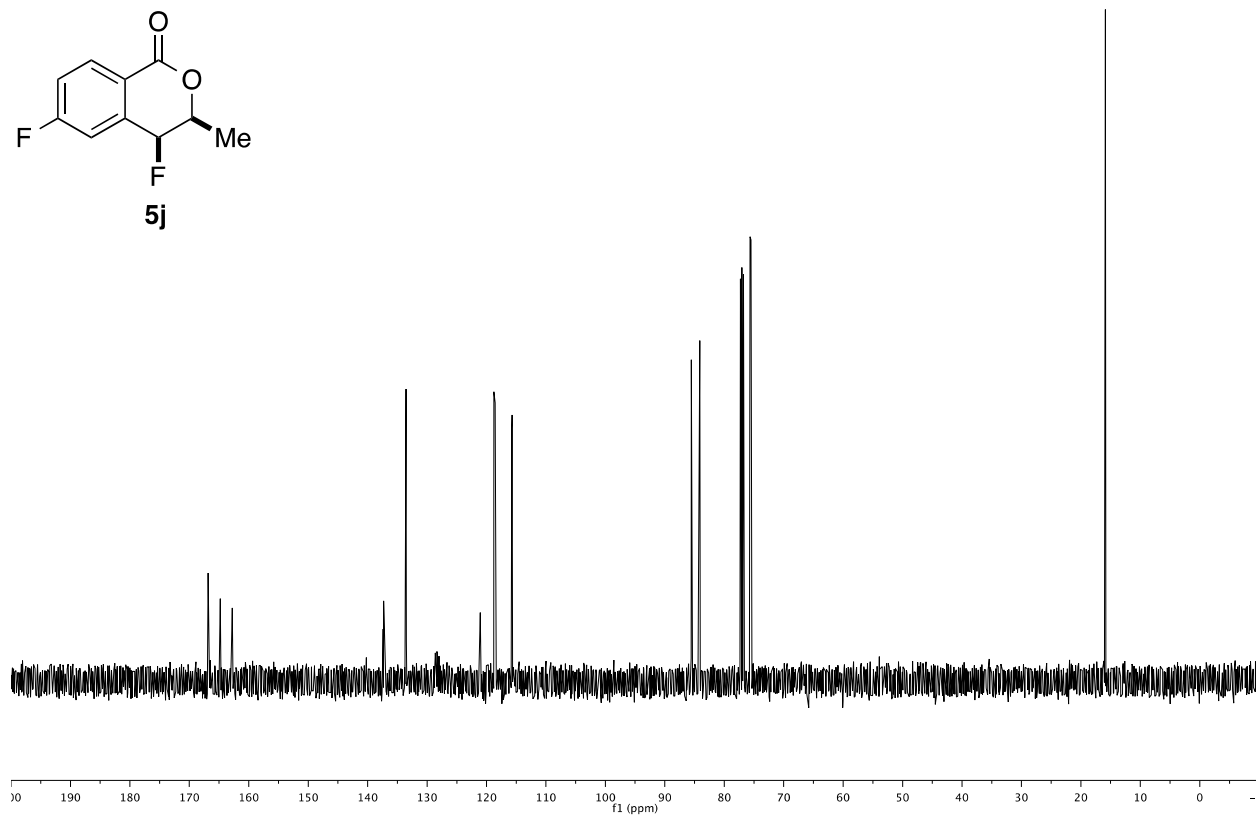

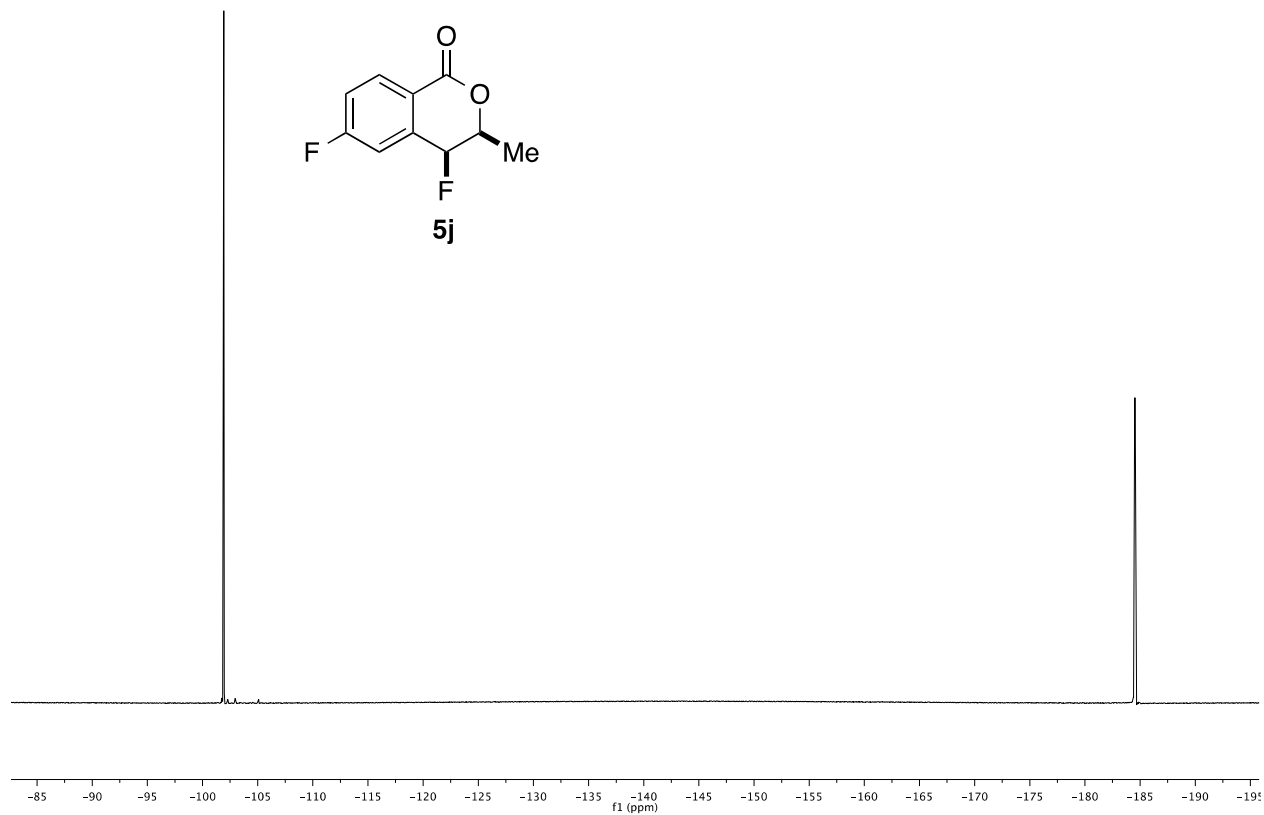

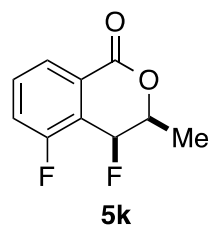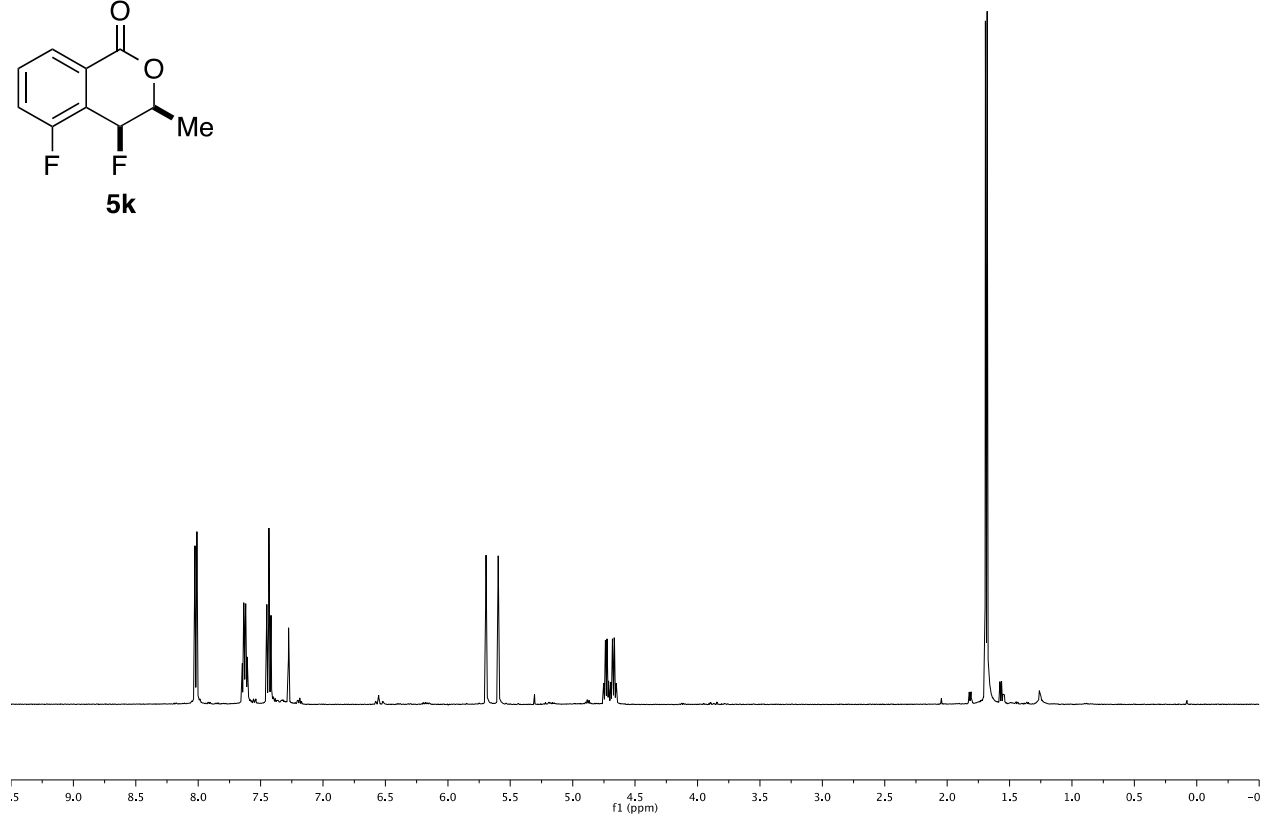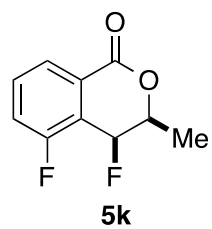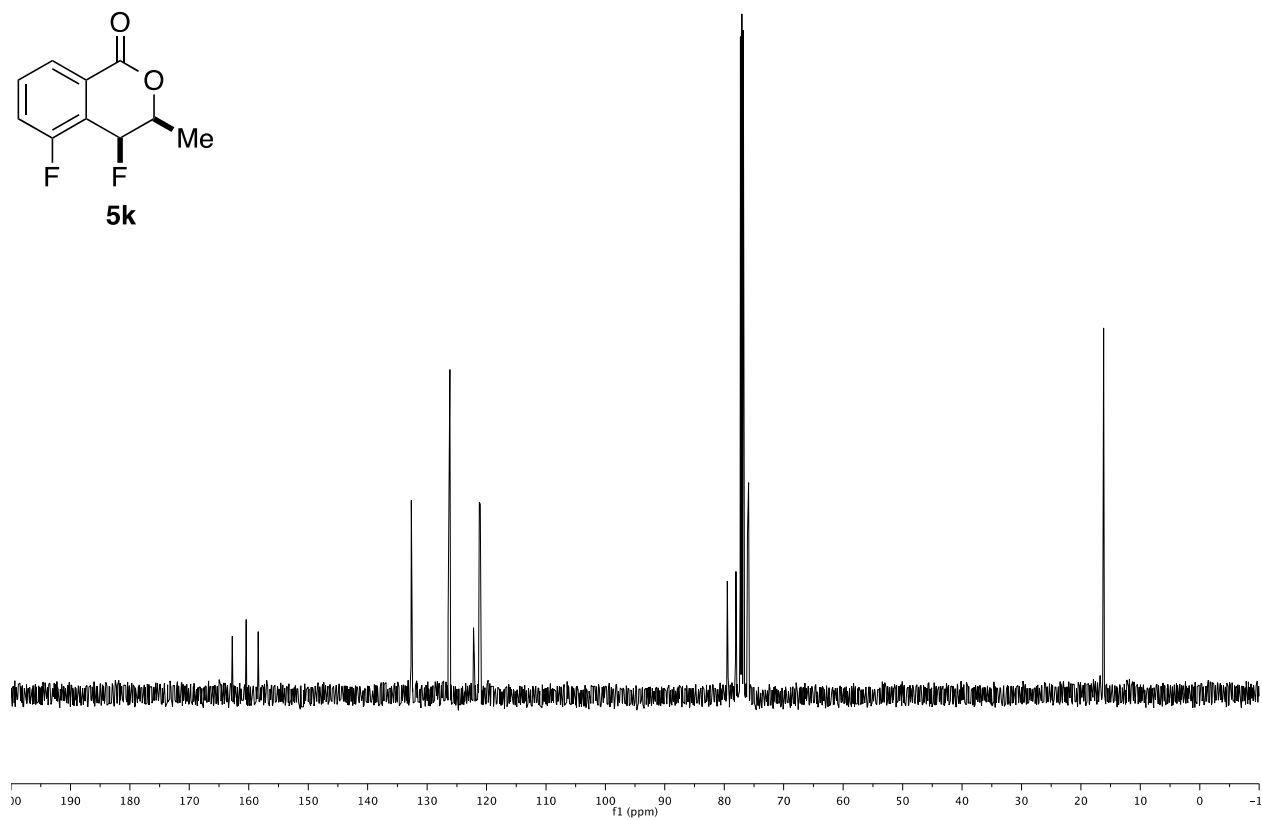

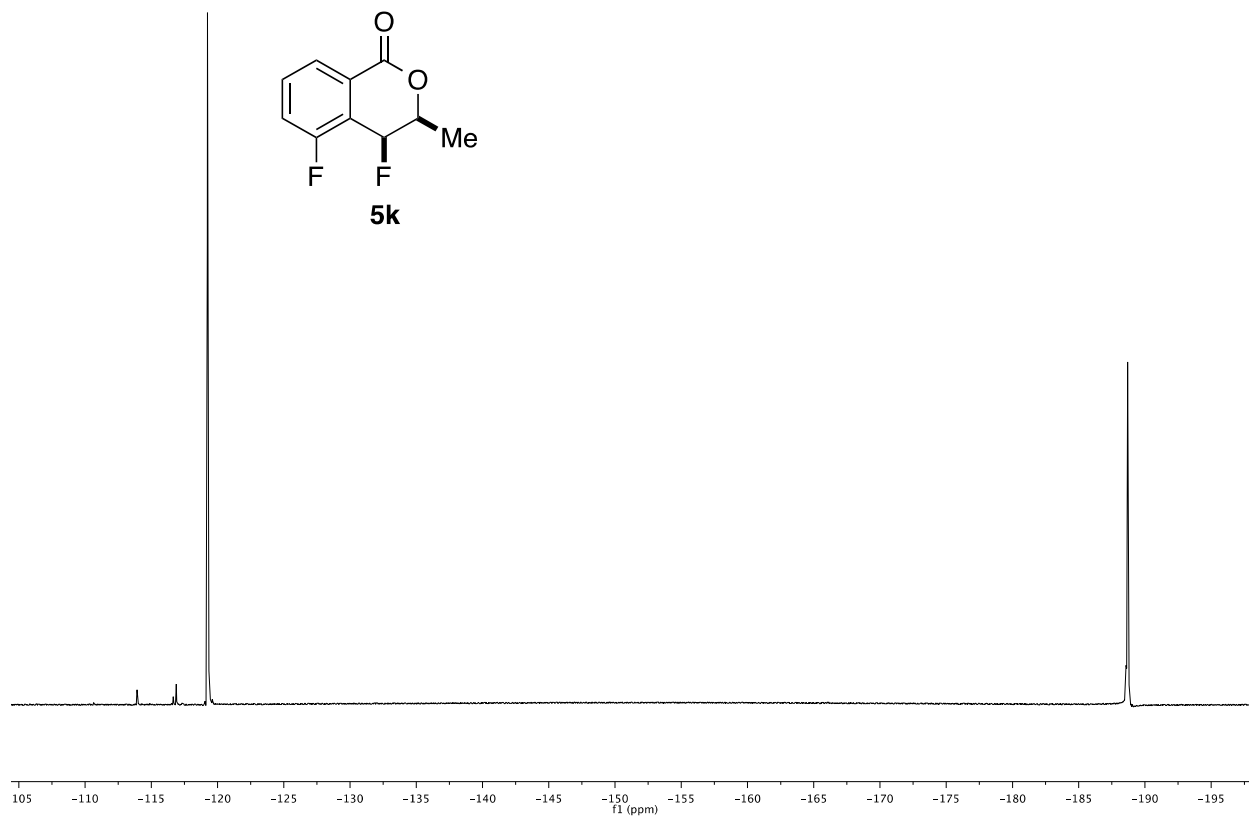

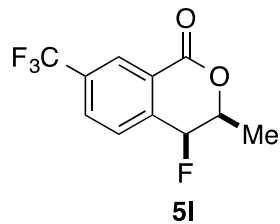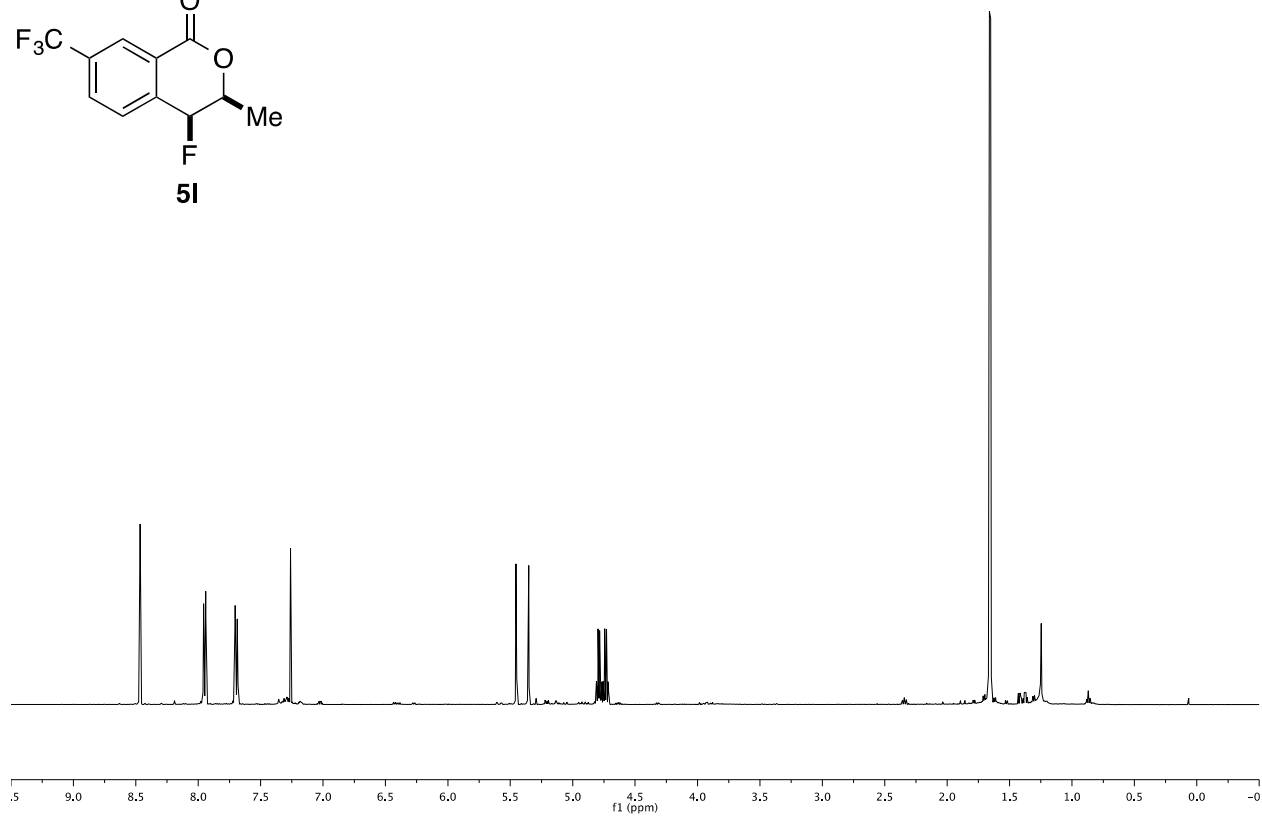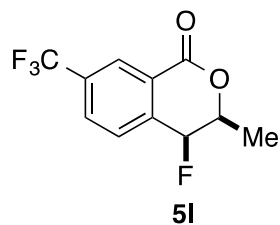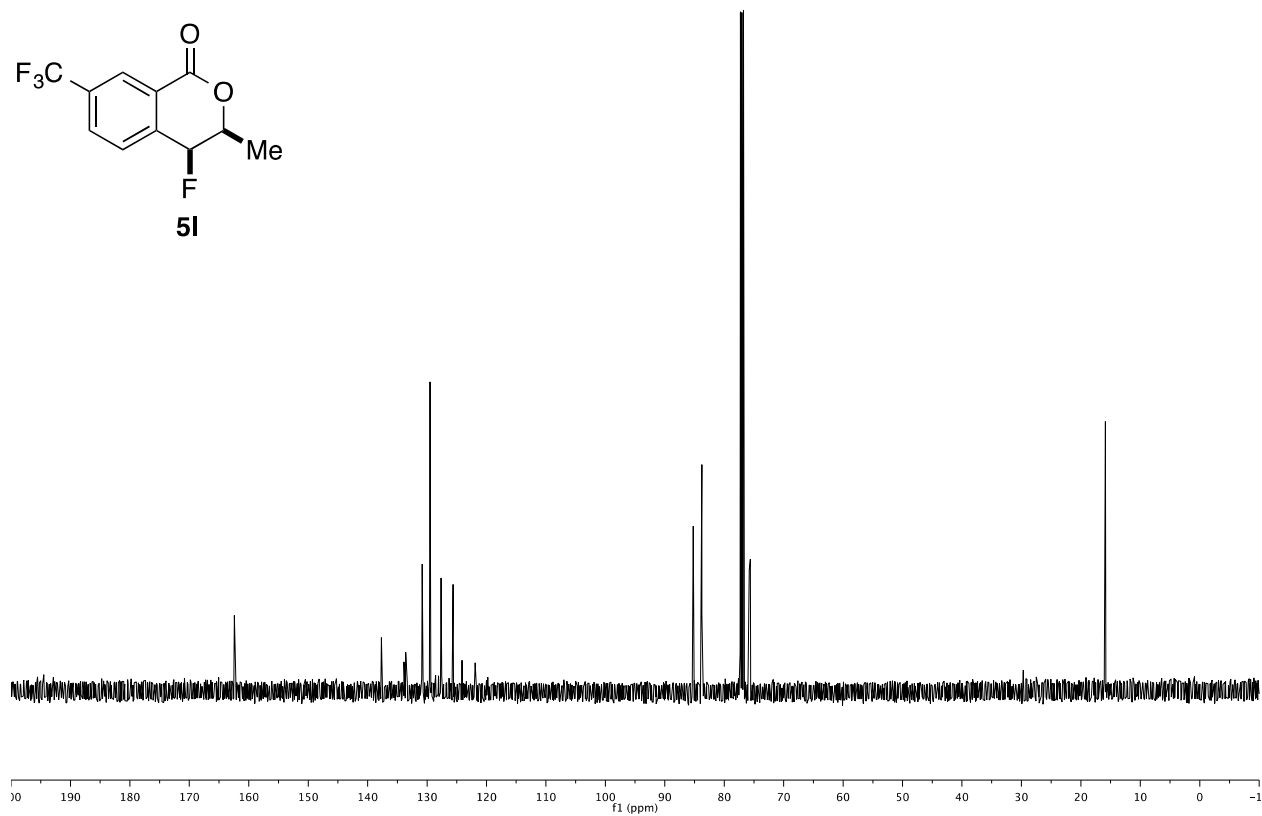

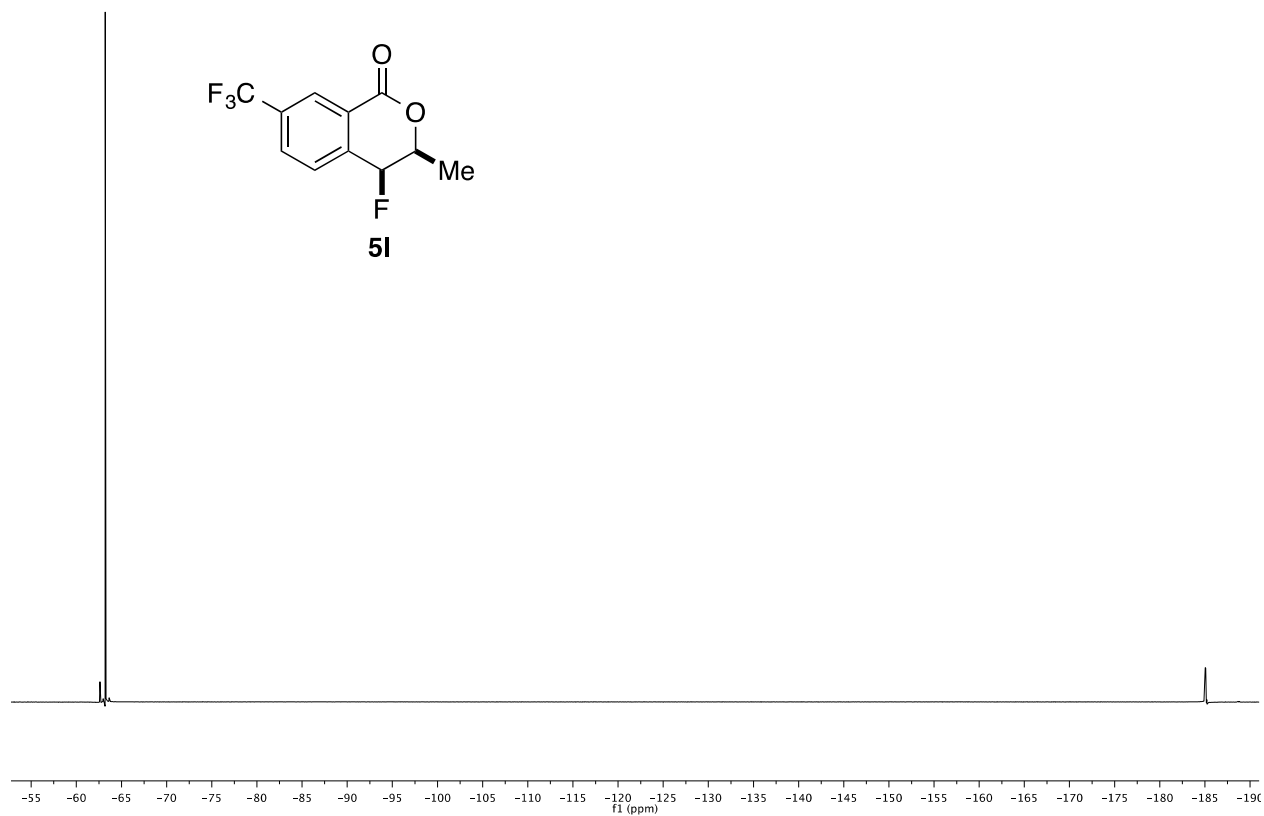

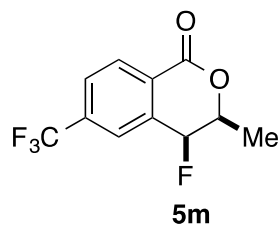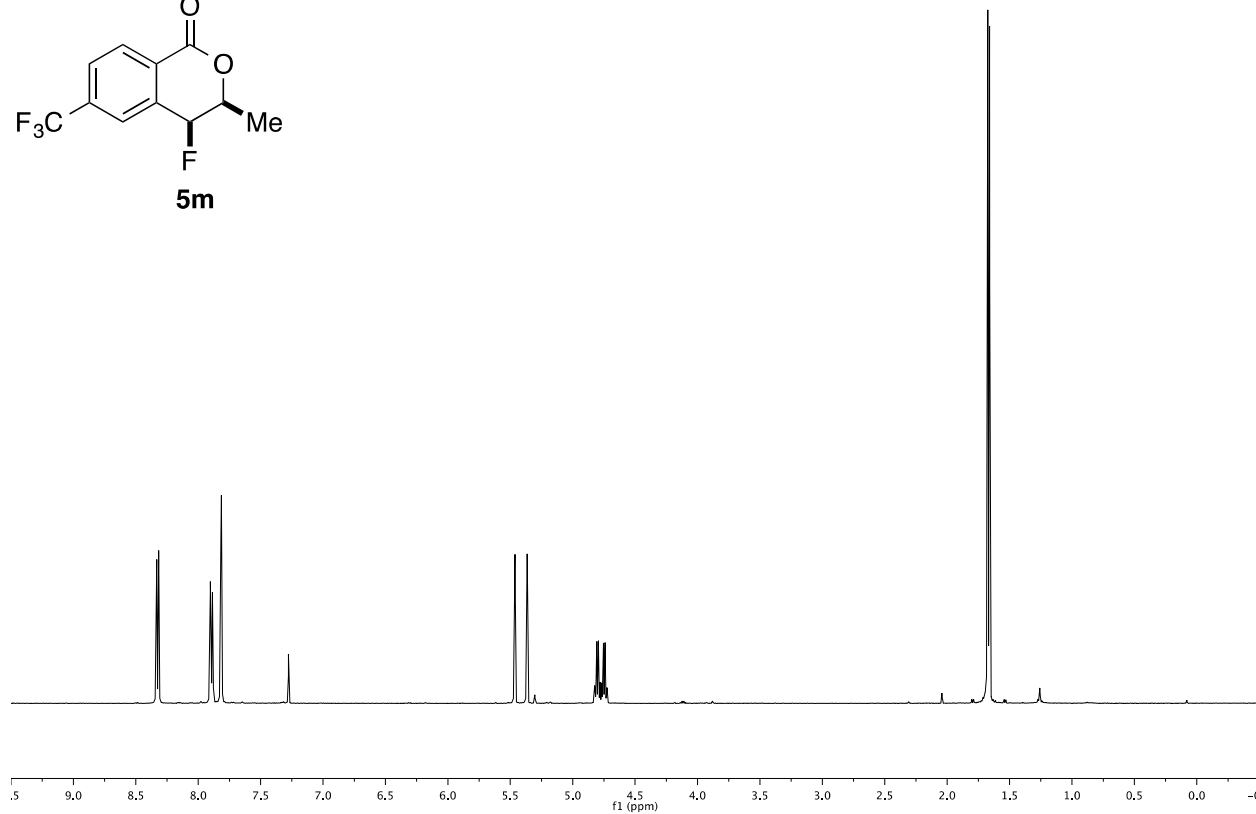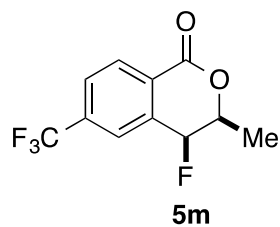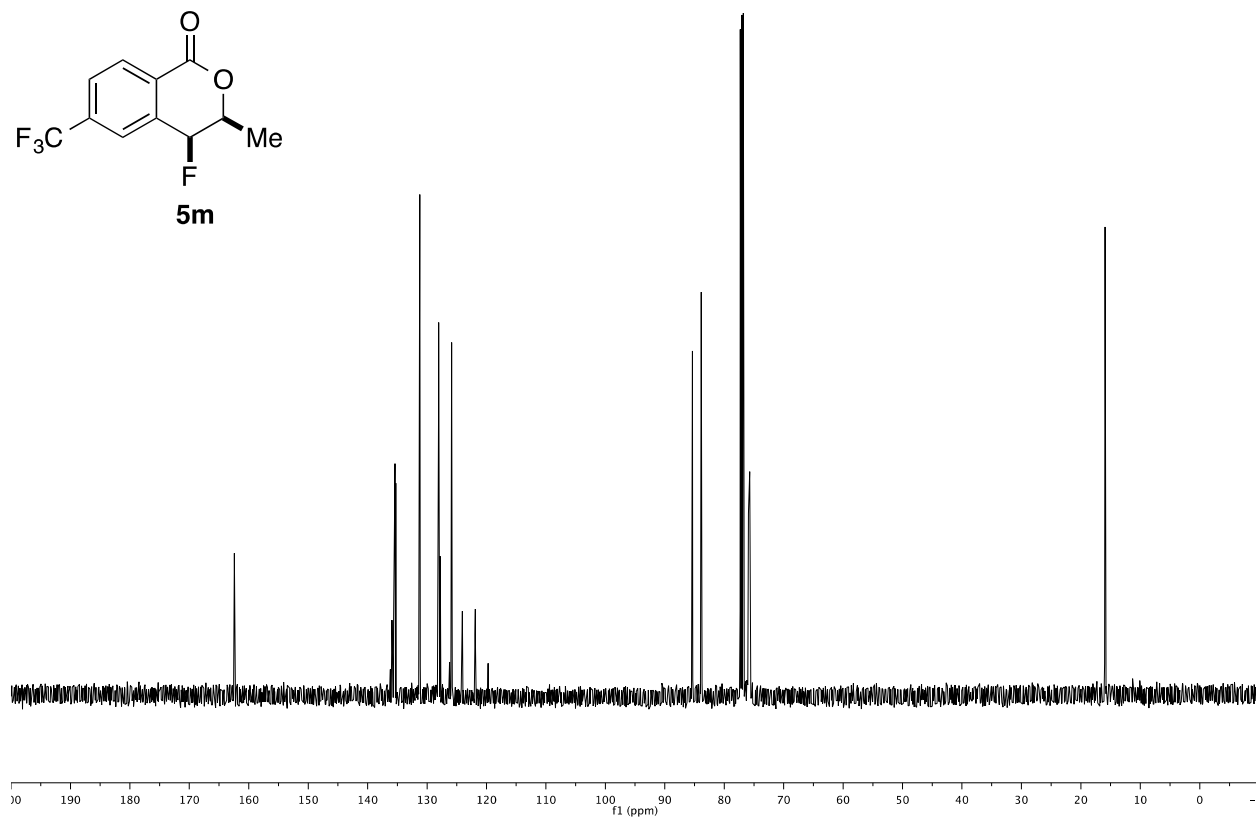



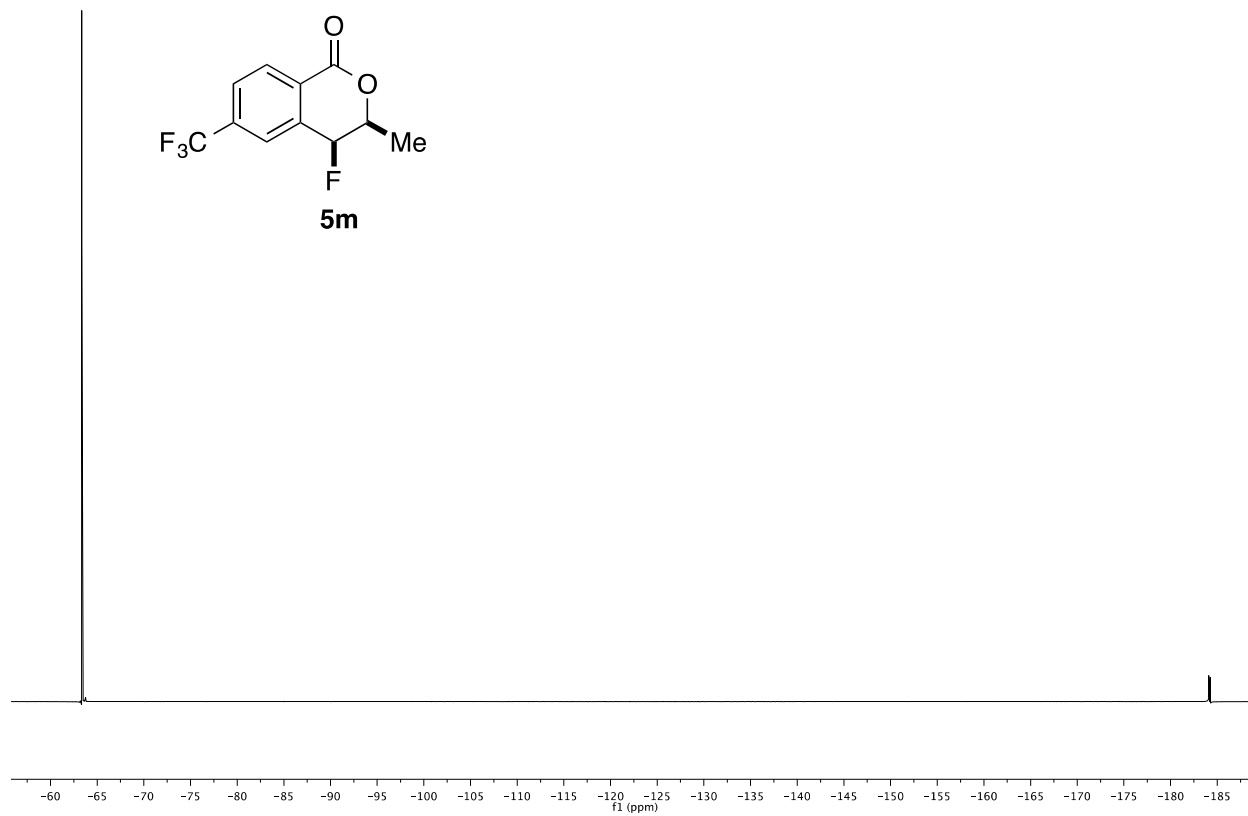

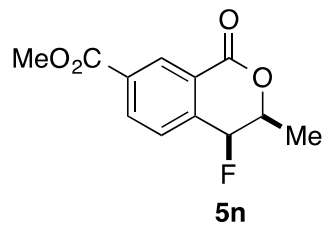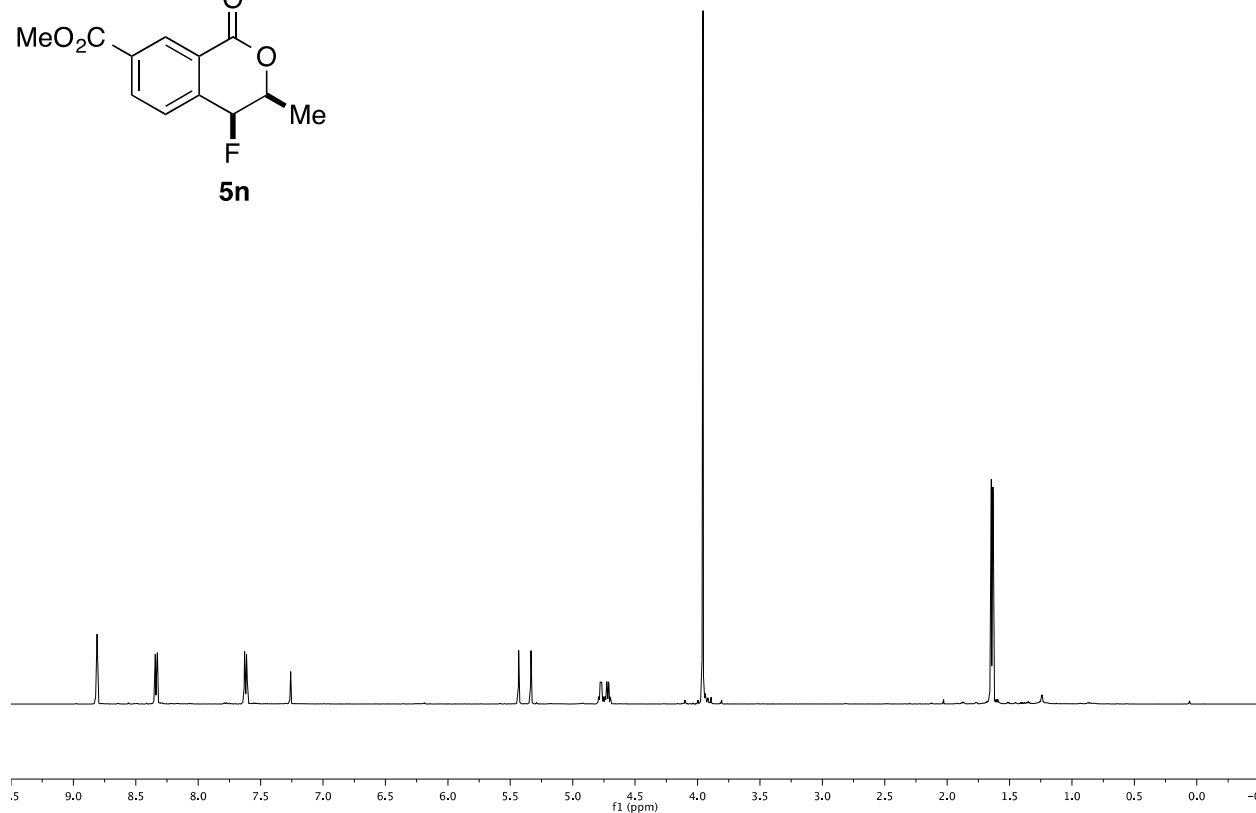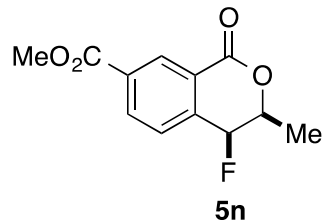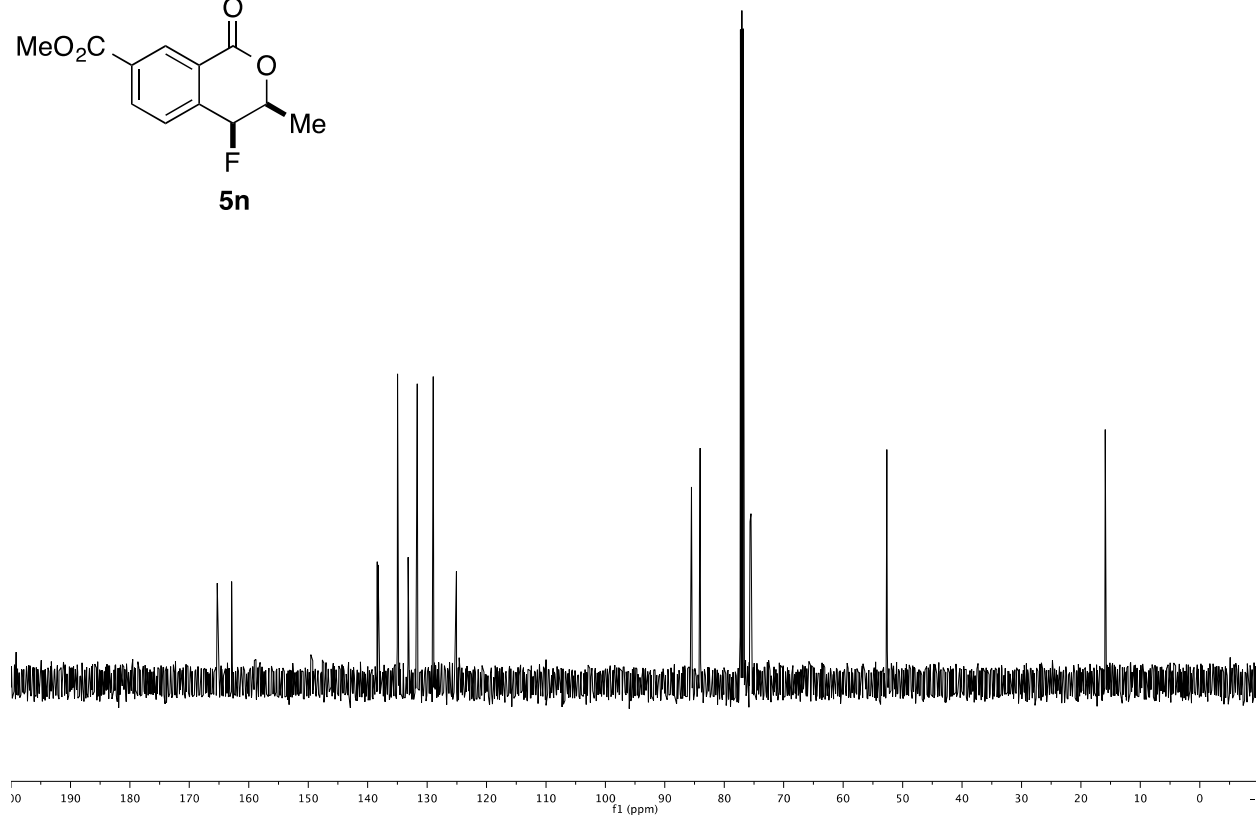

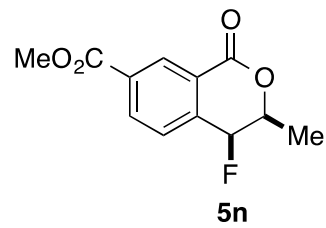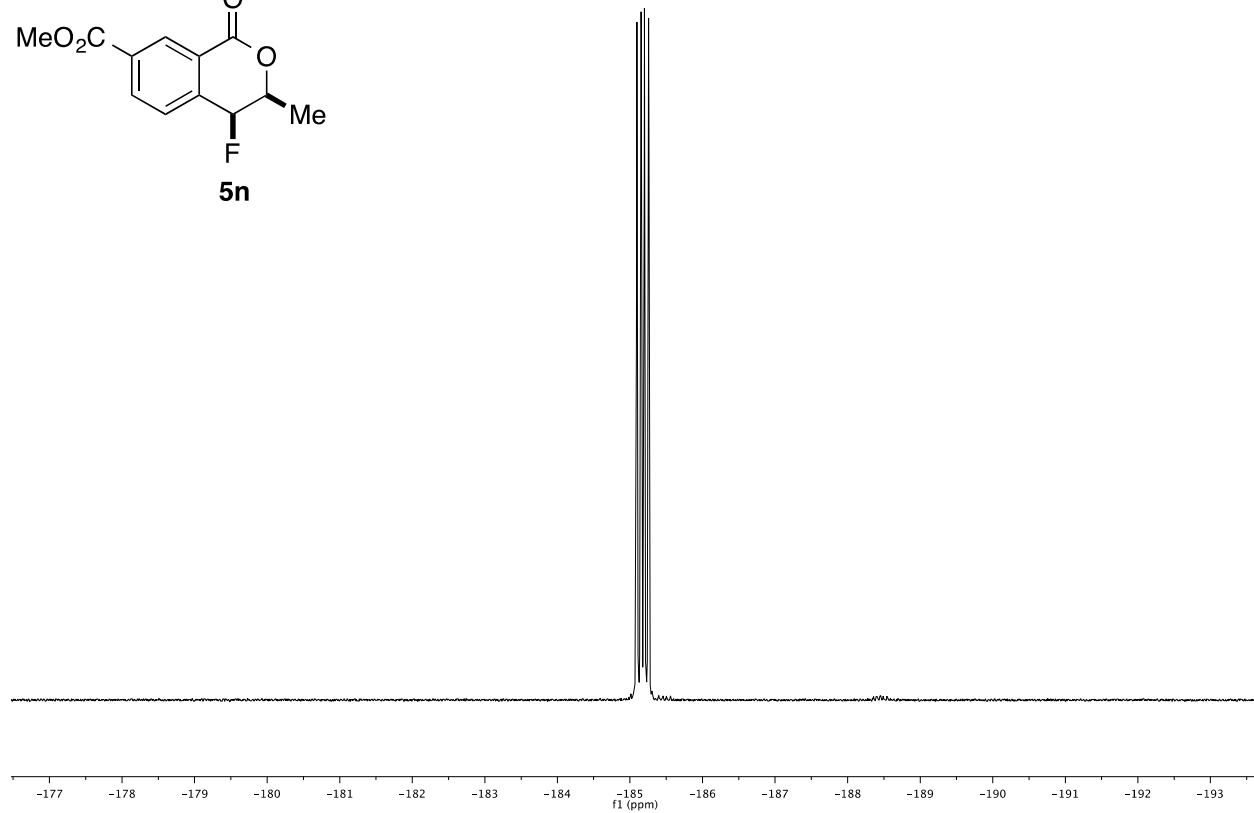

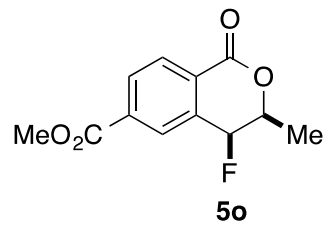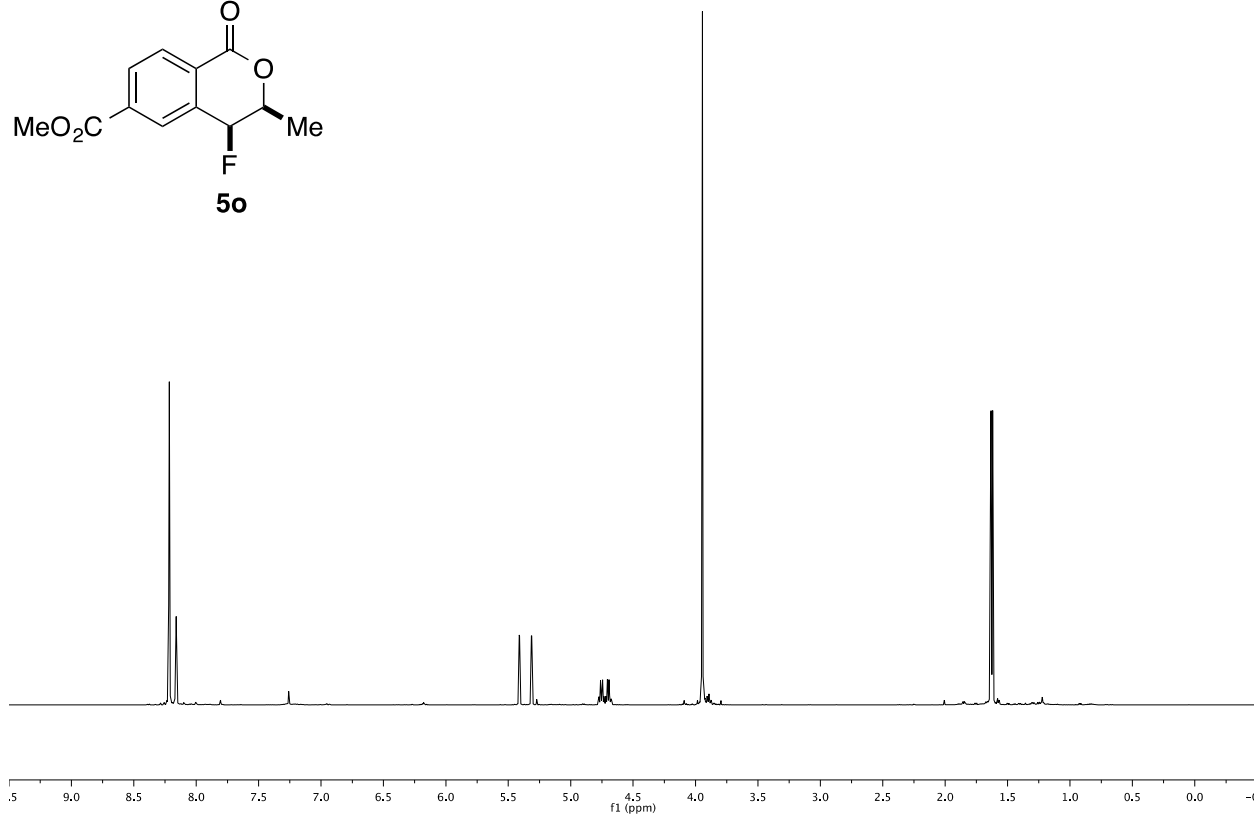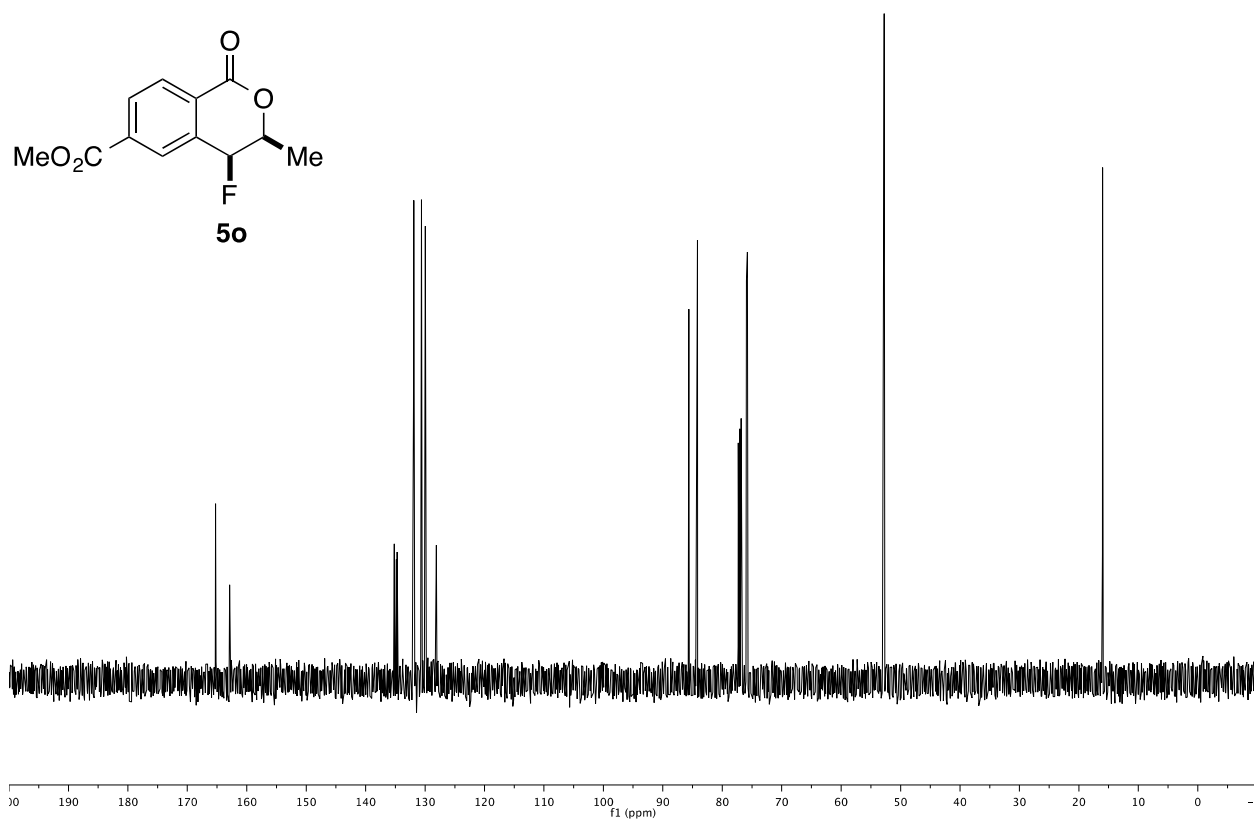

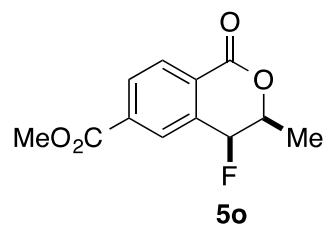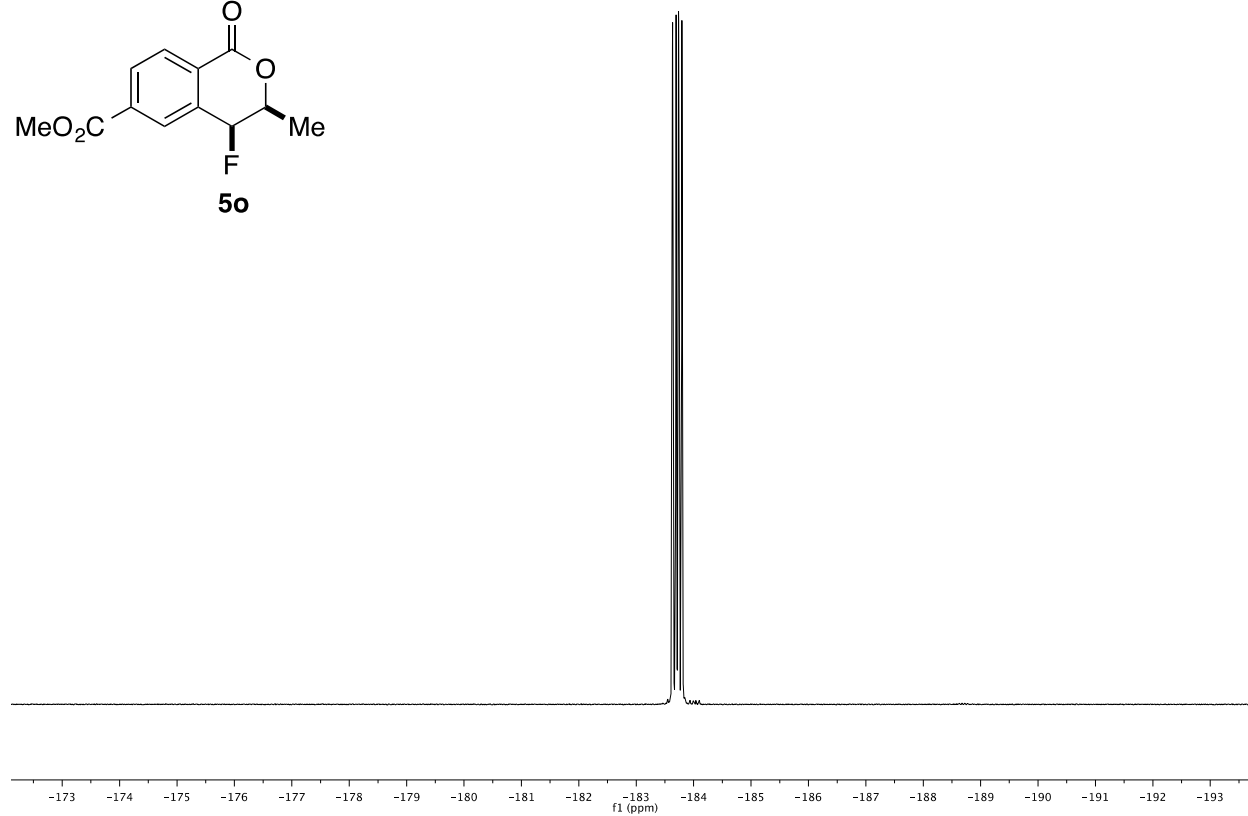

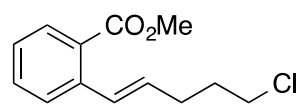

**6c**

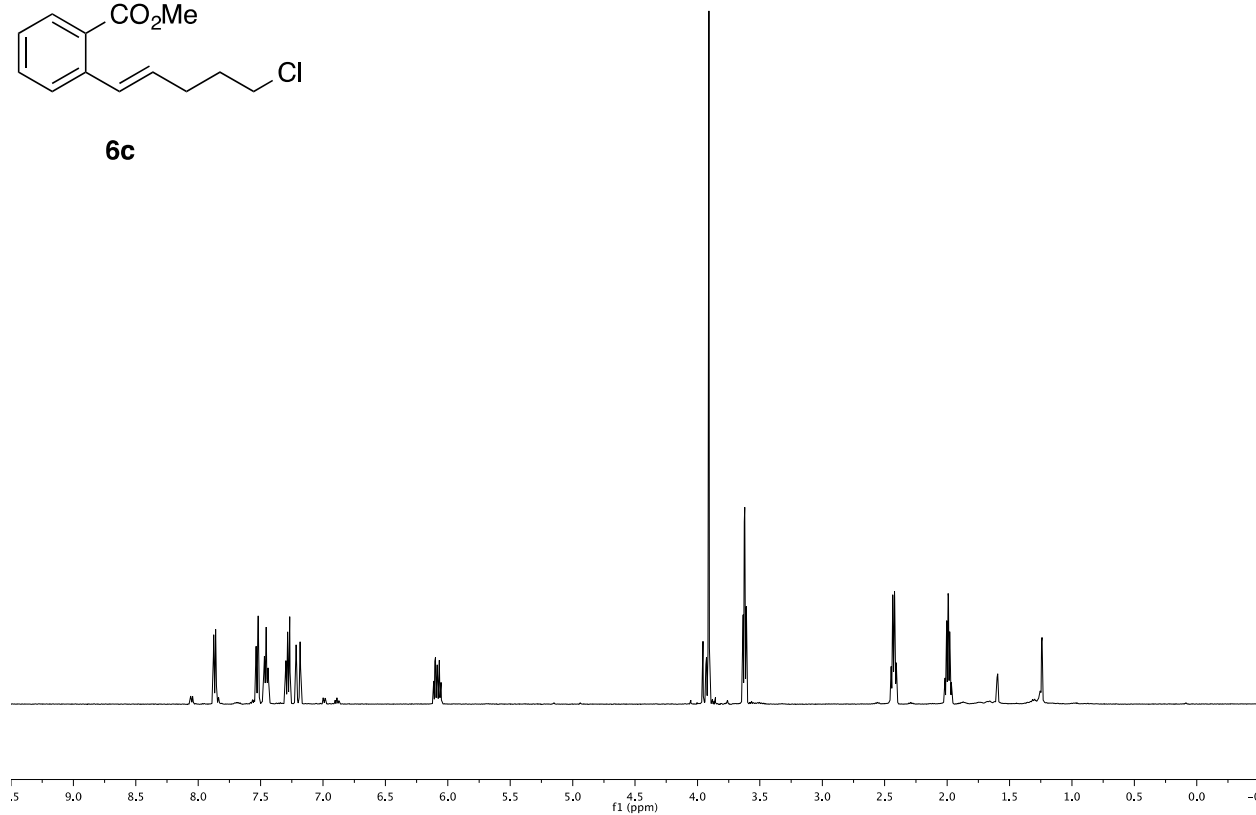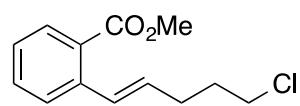

**6c**

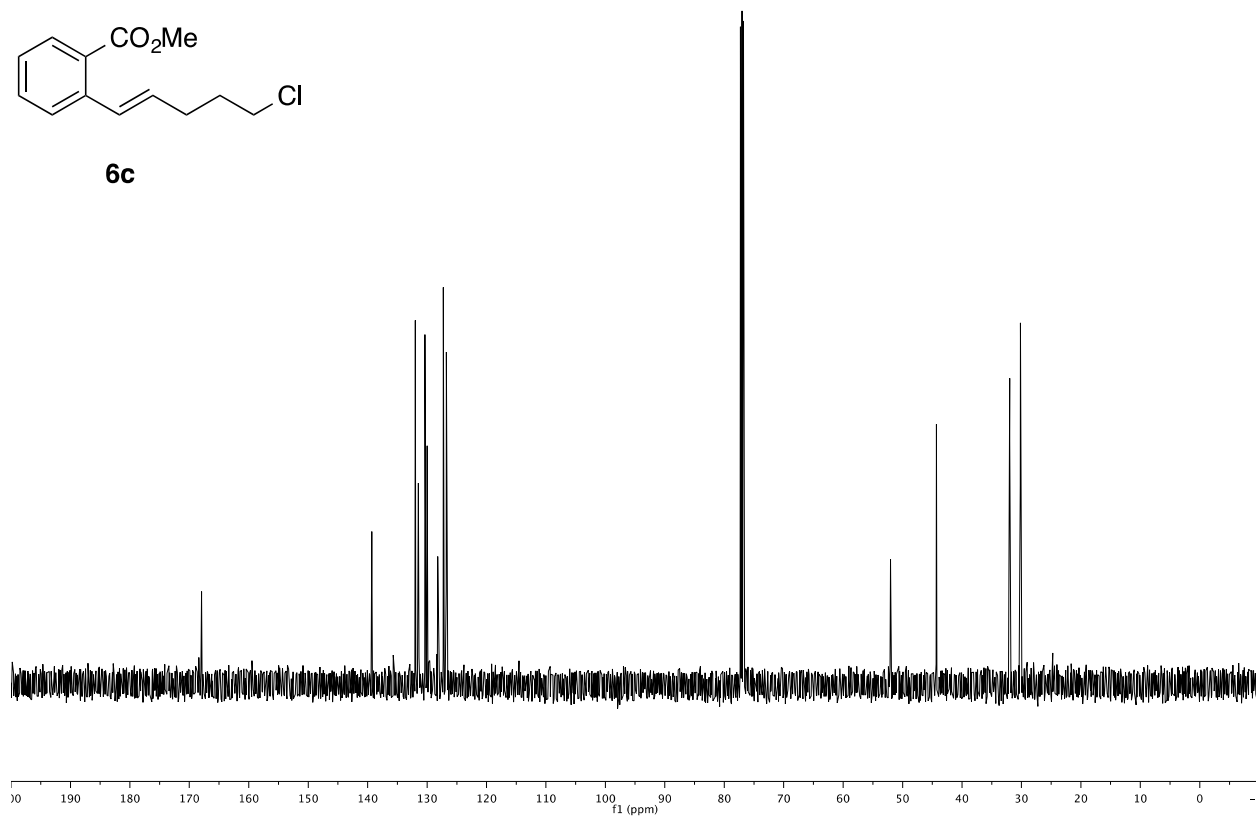

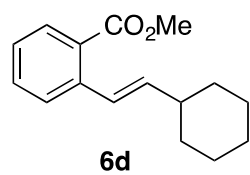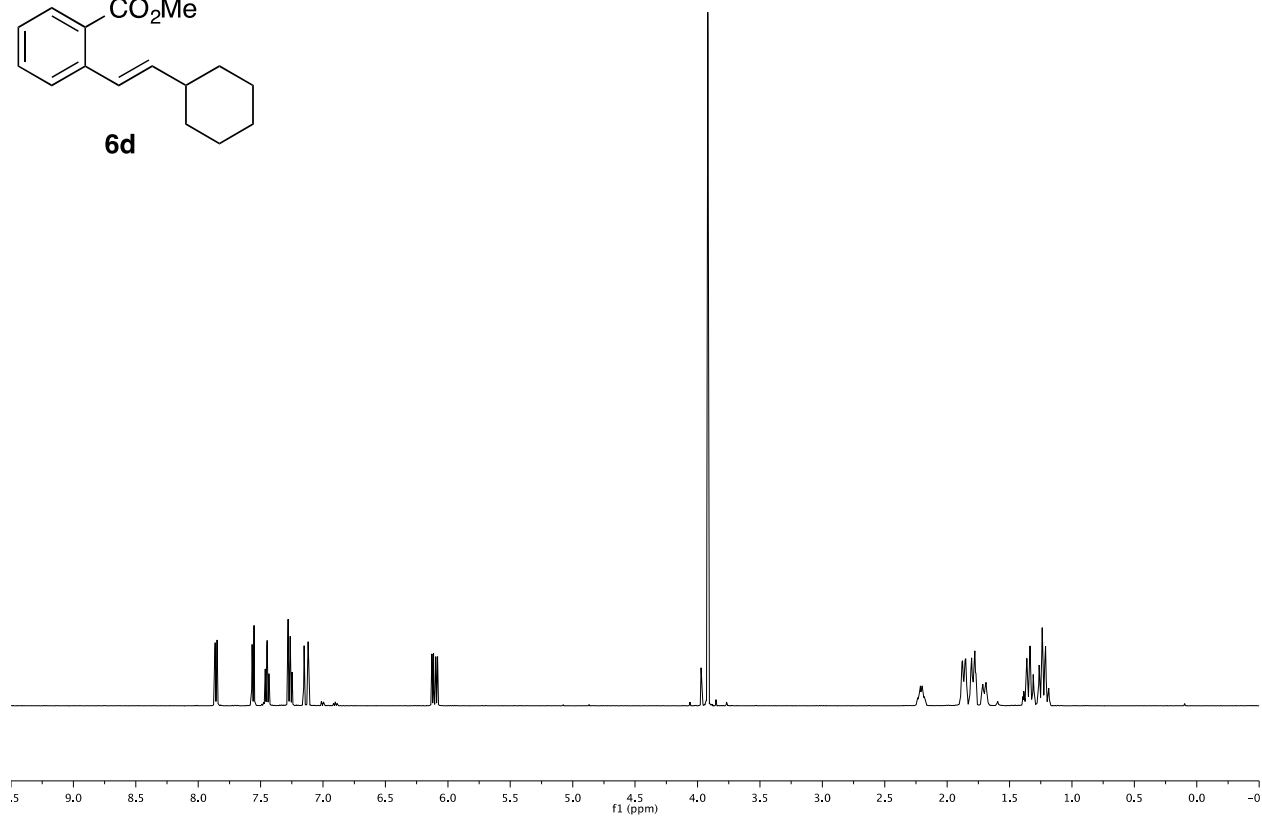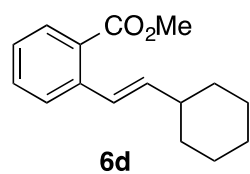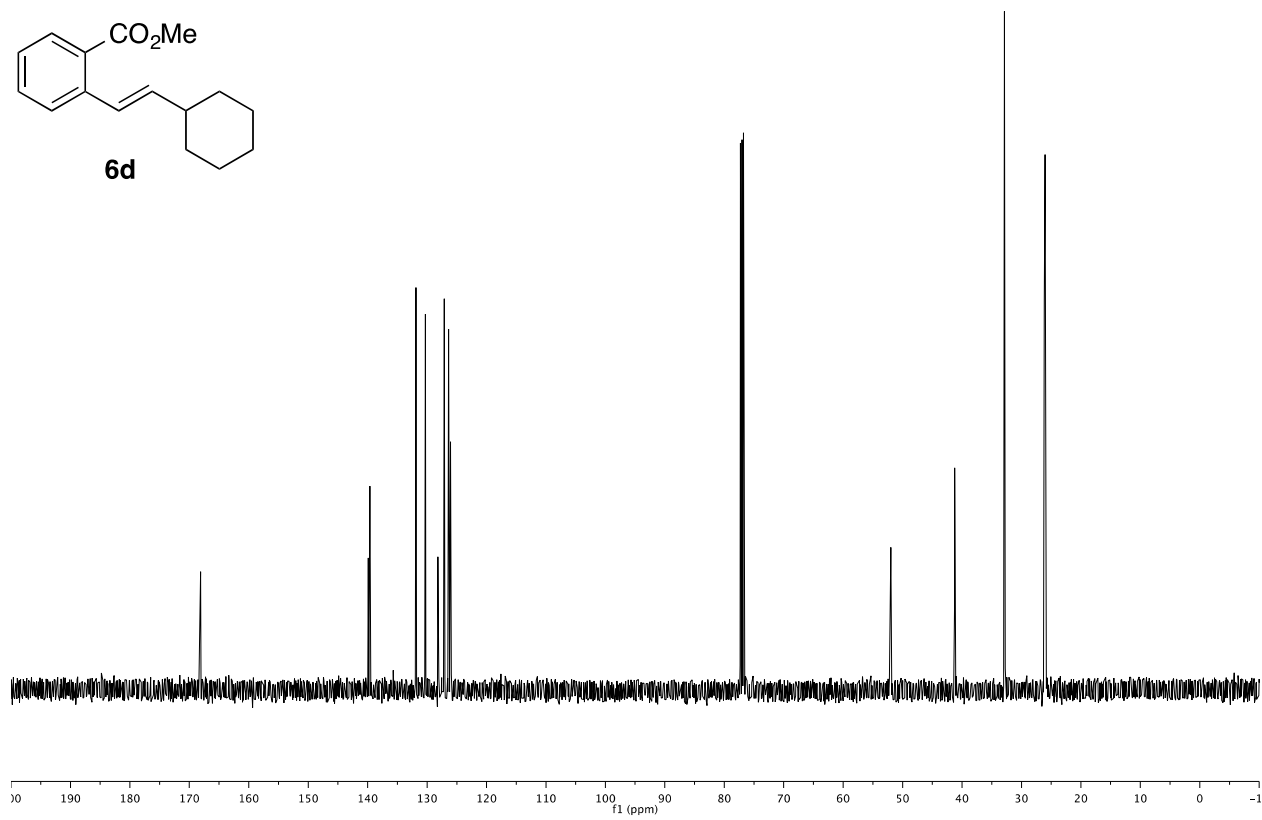

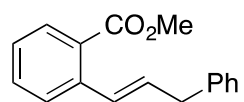

**6e**

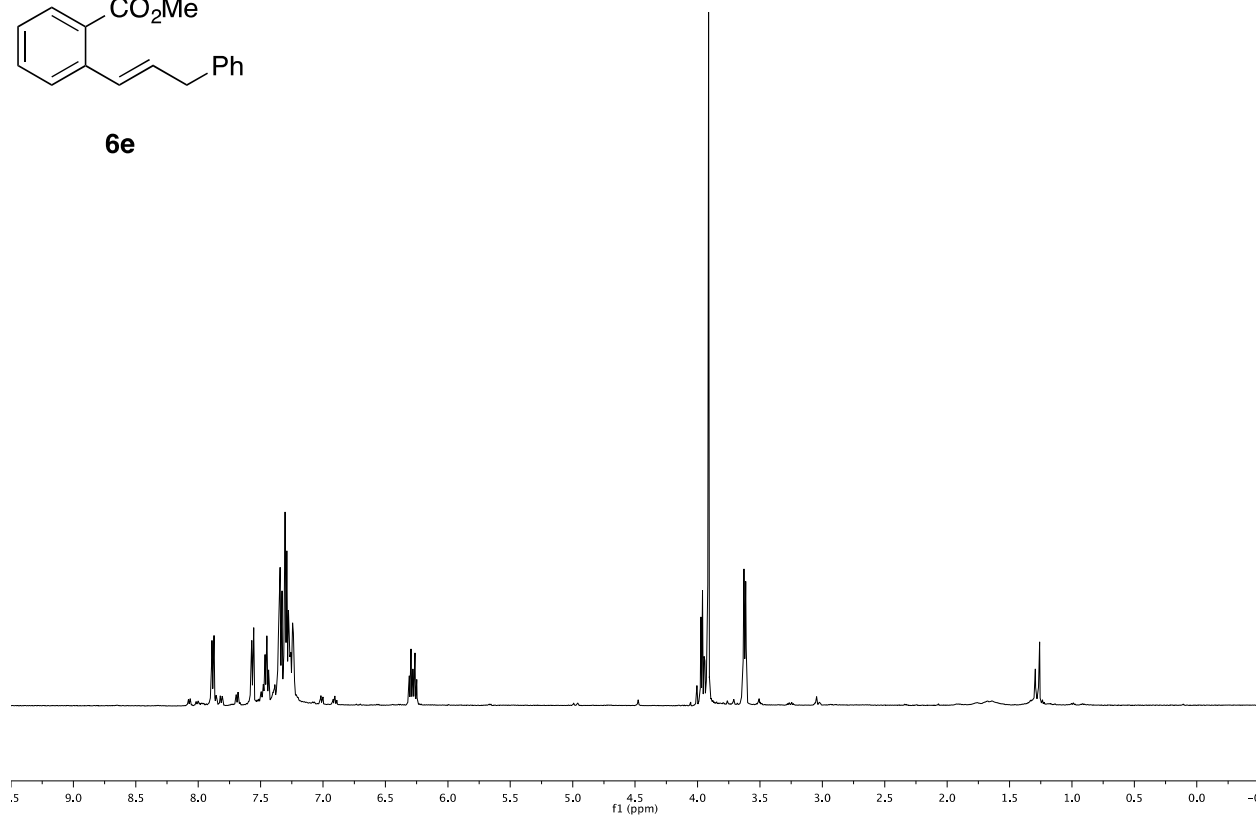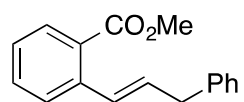

**6e**

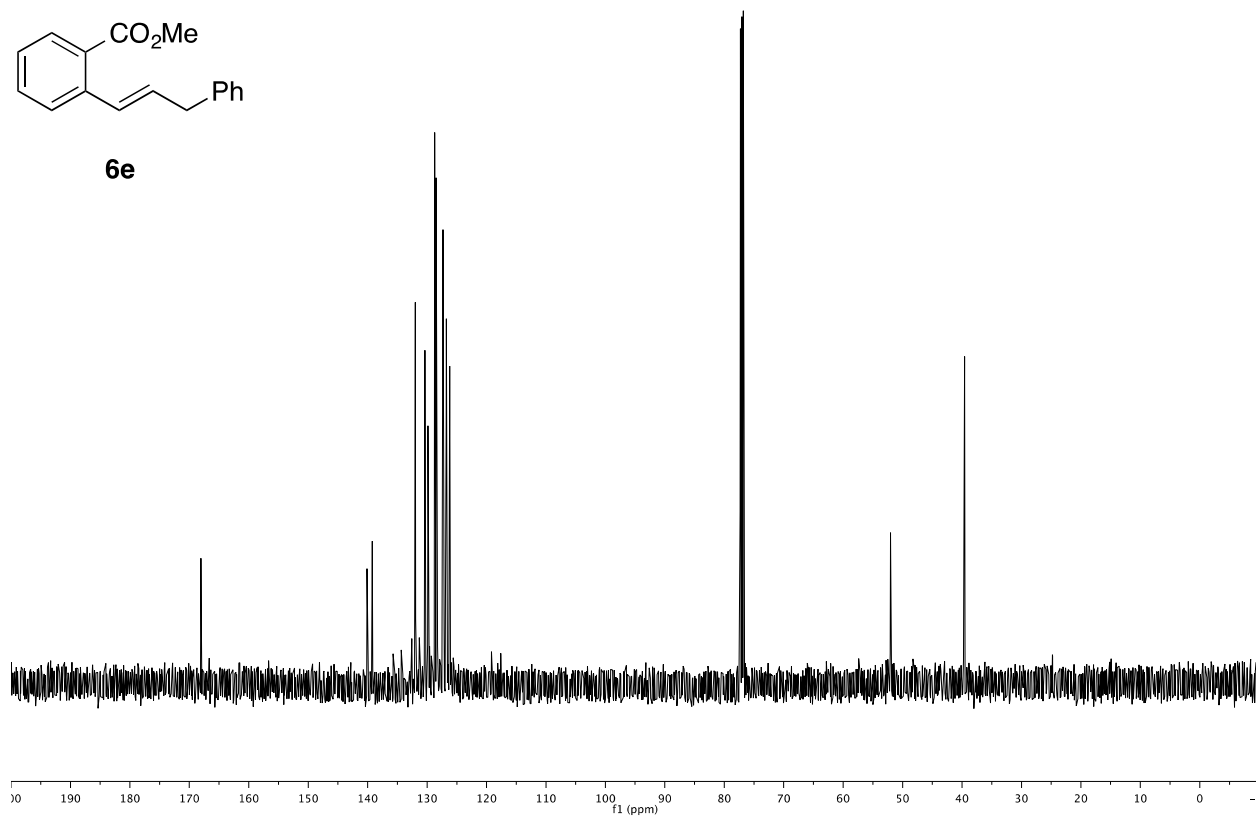



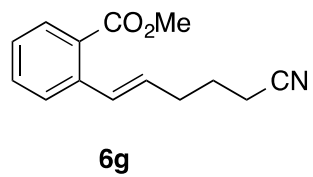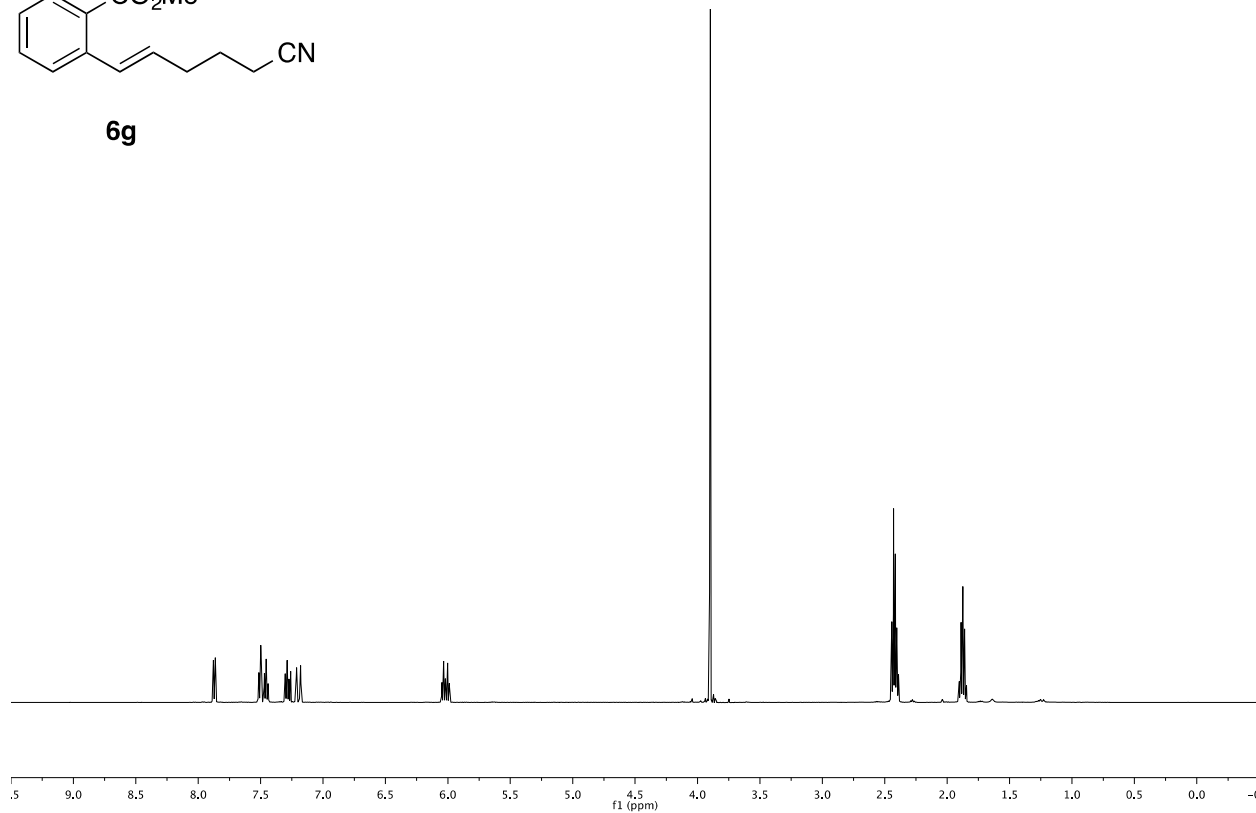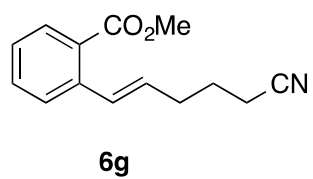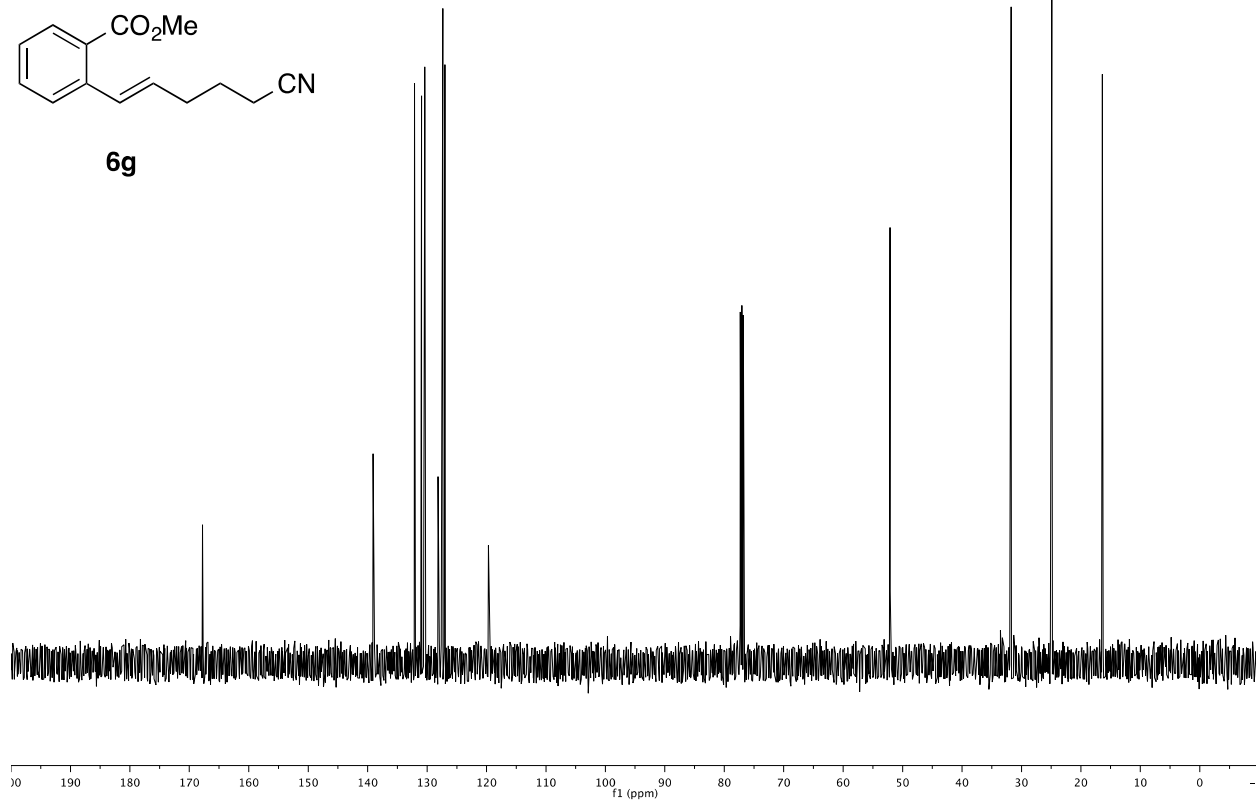

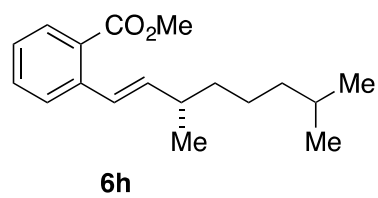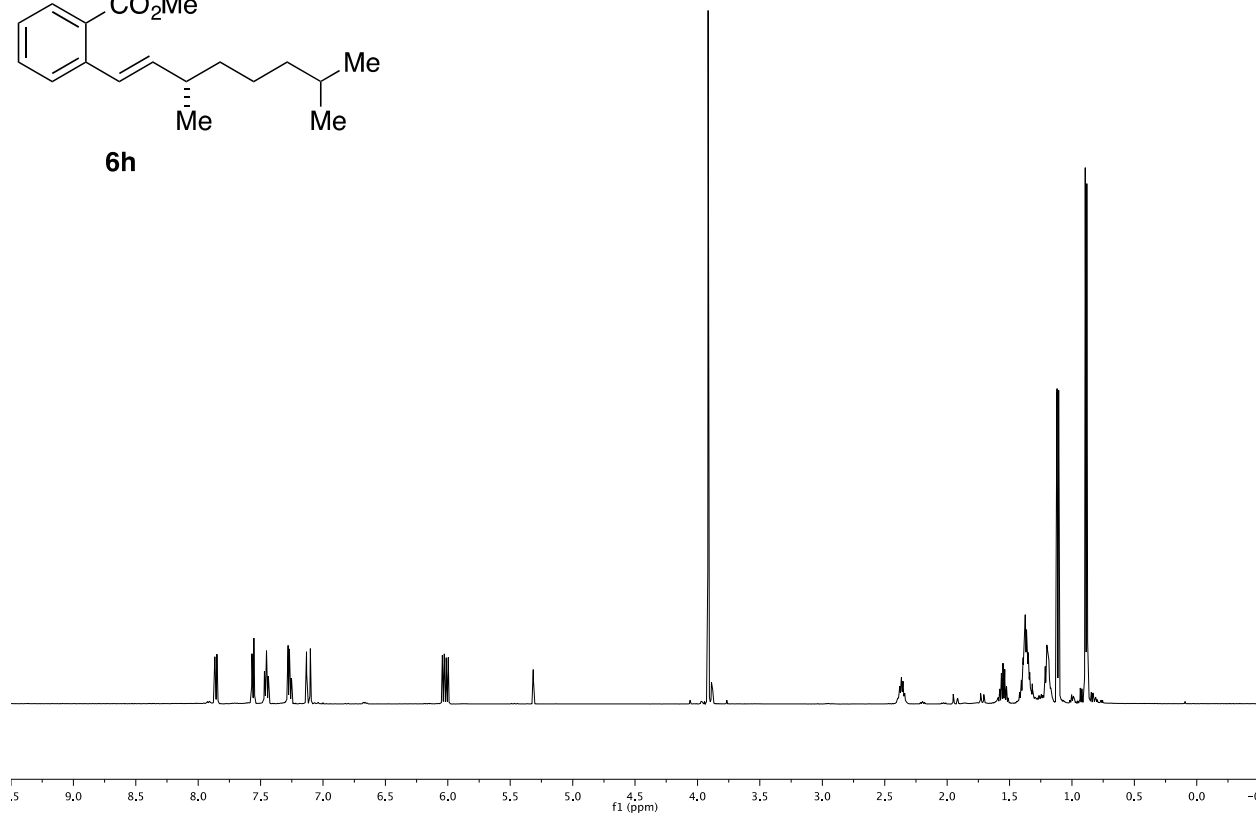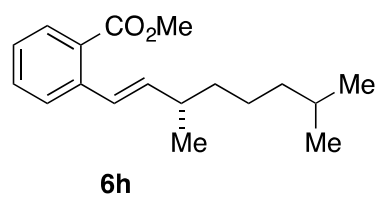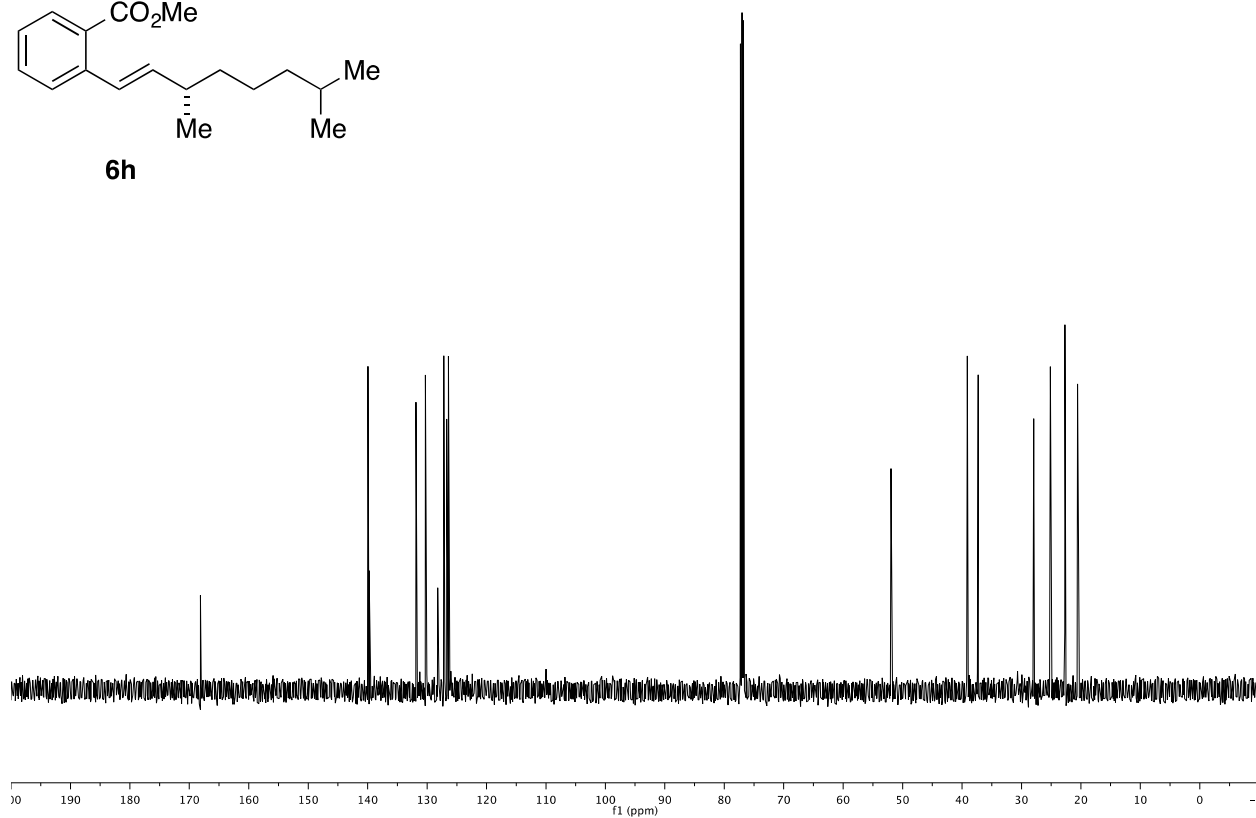

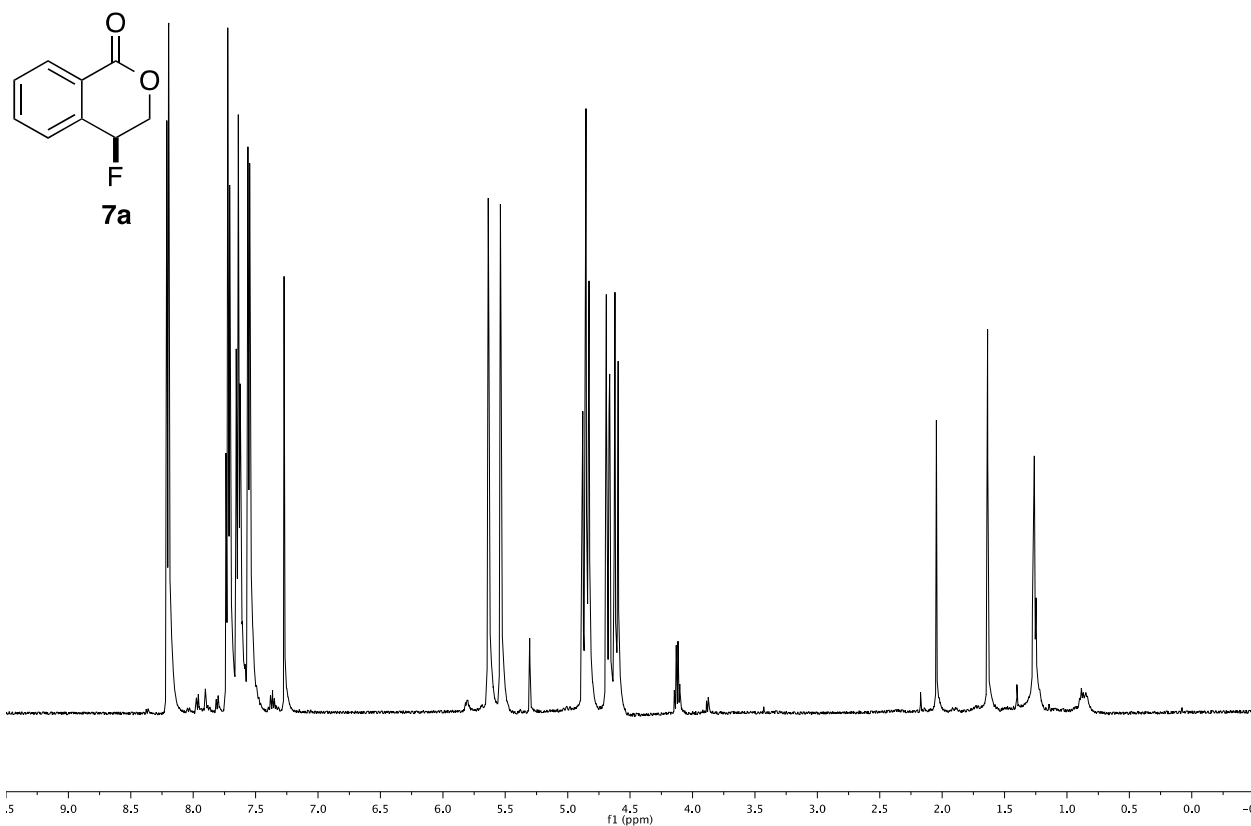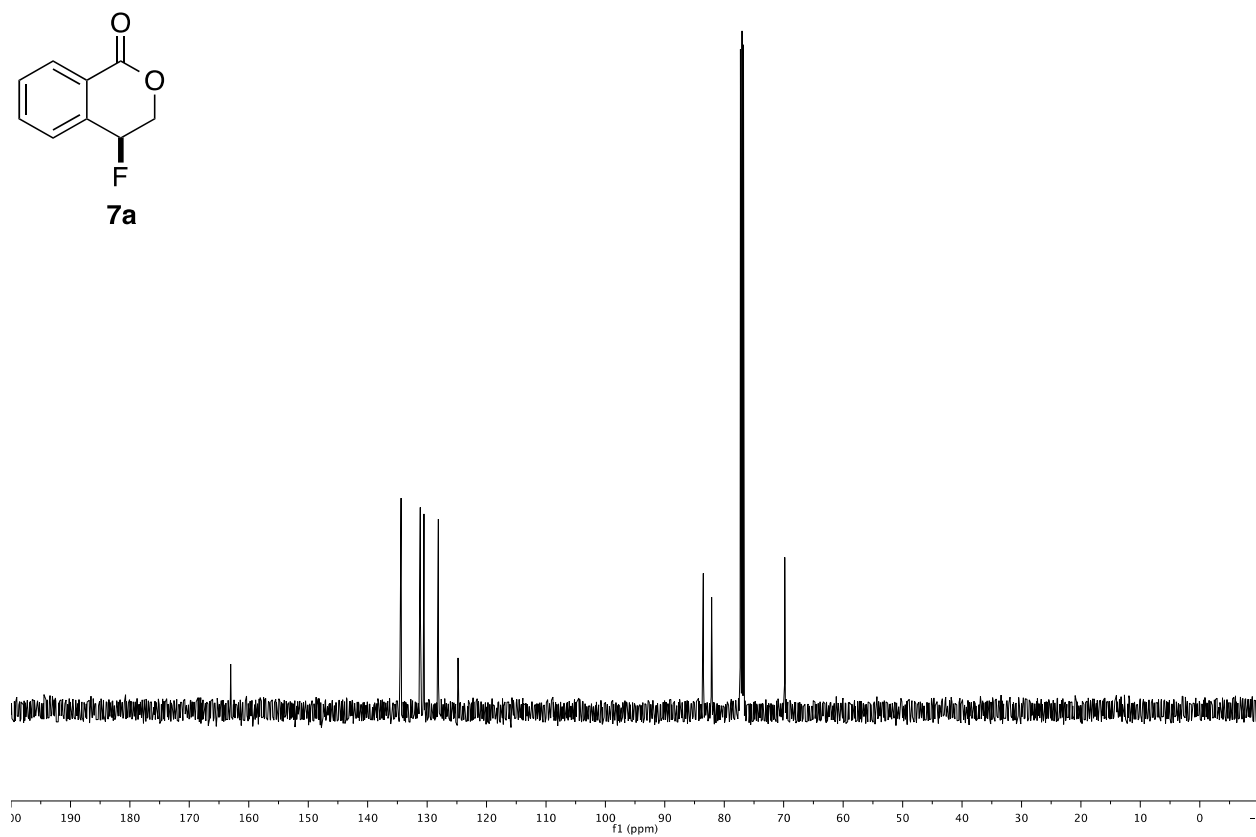

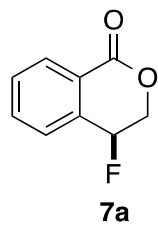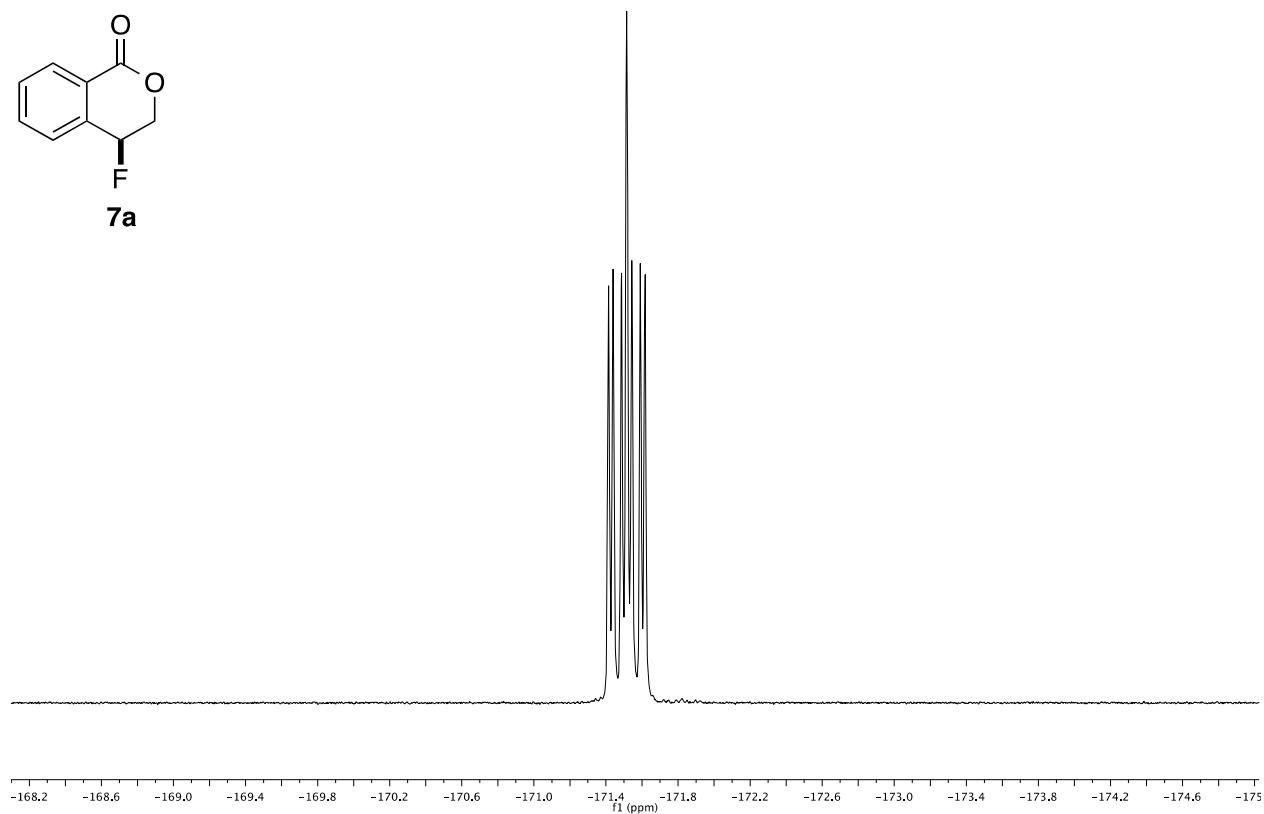

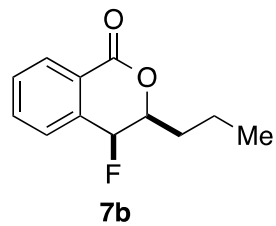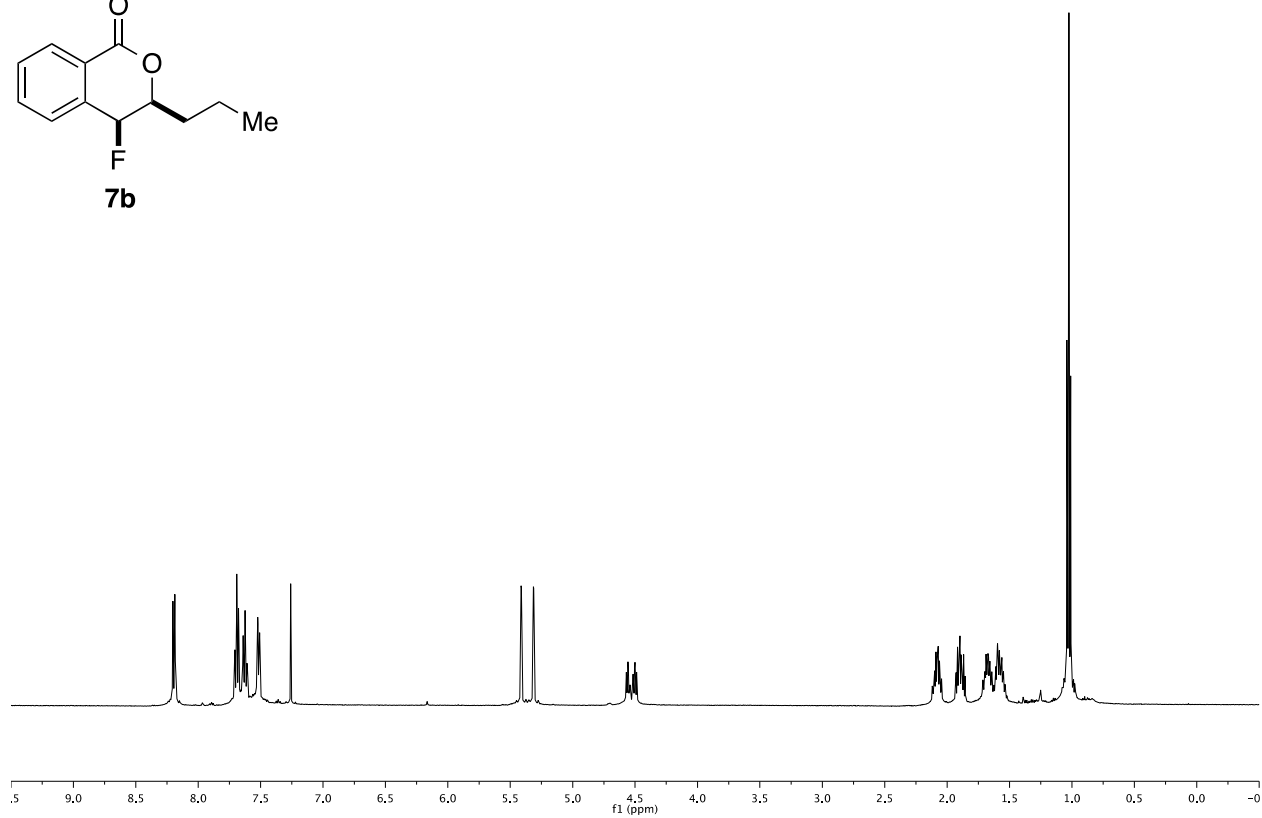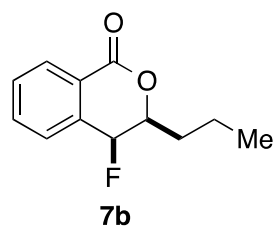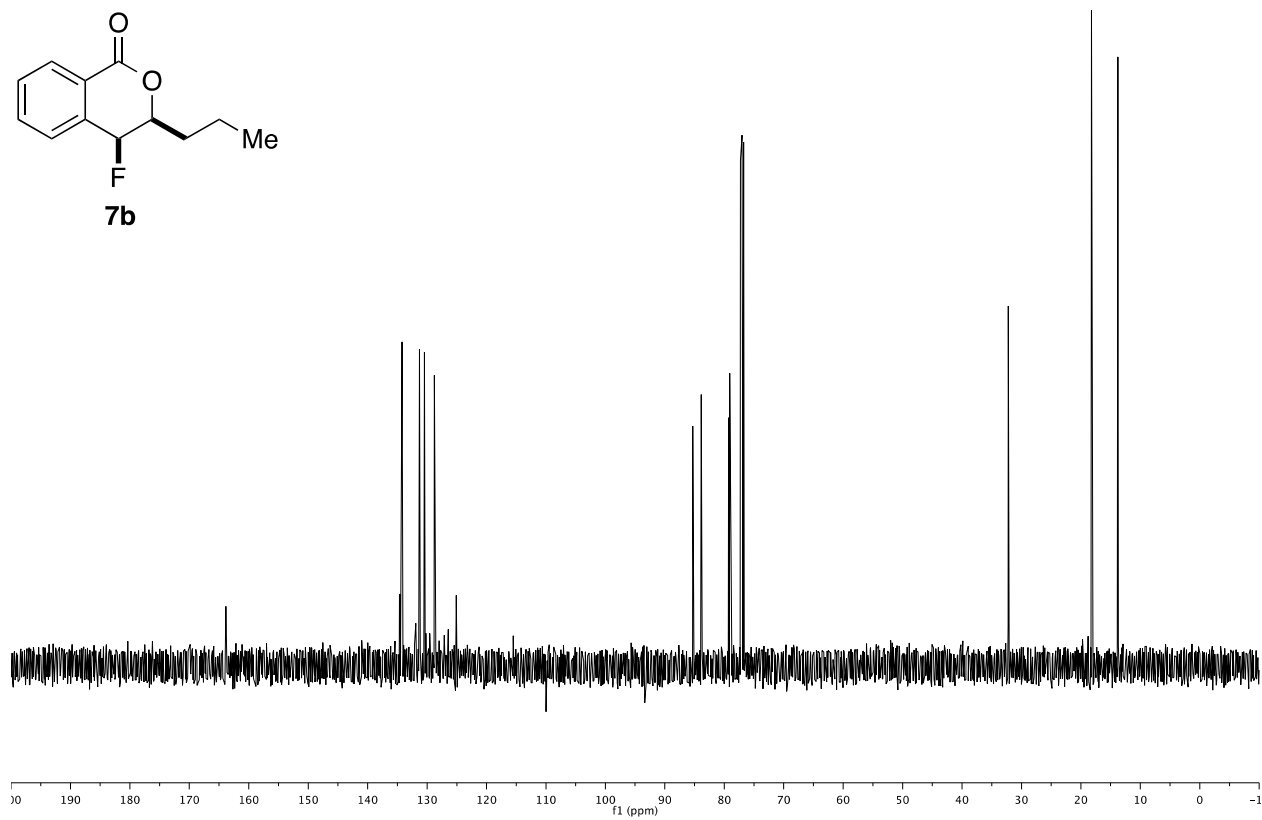

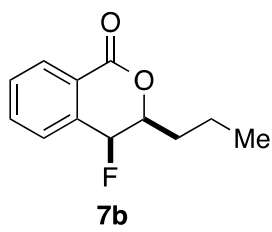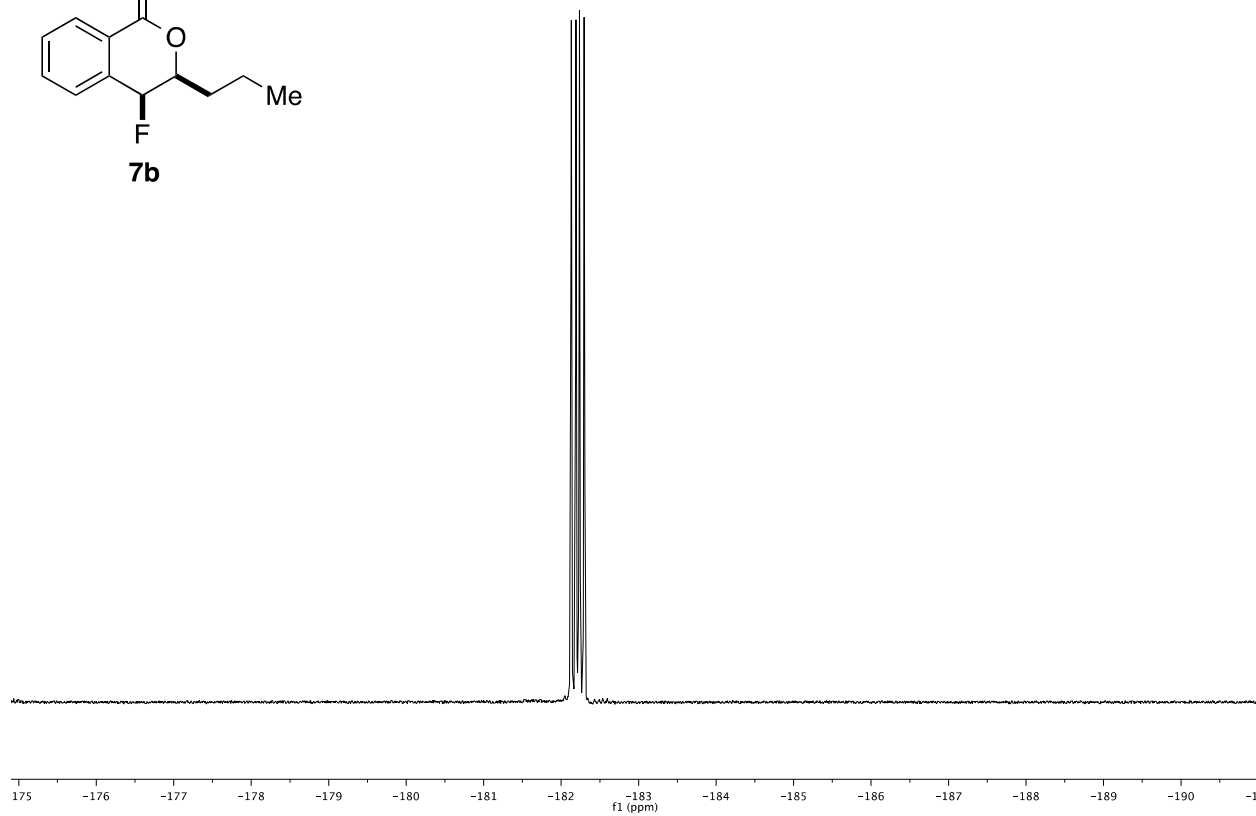

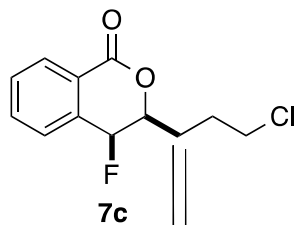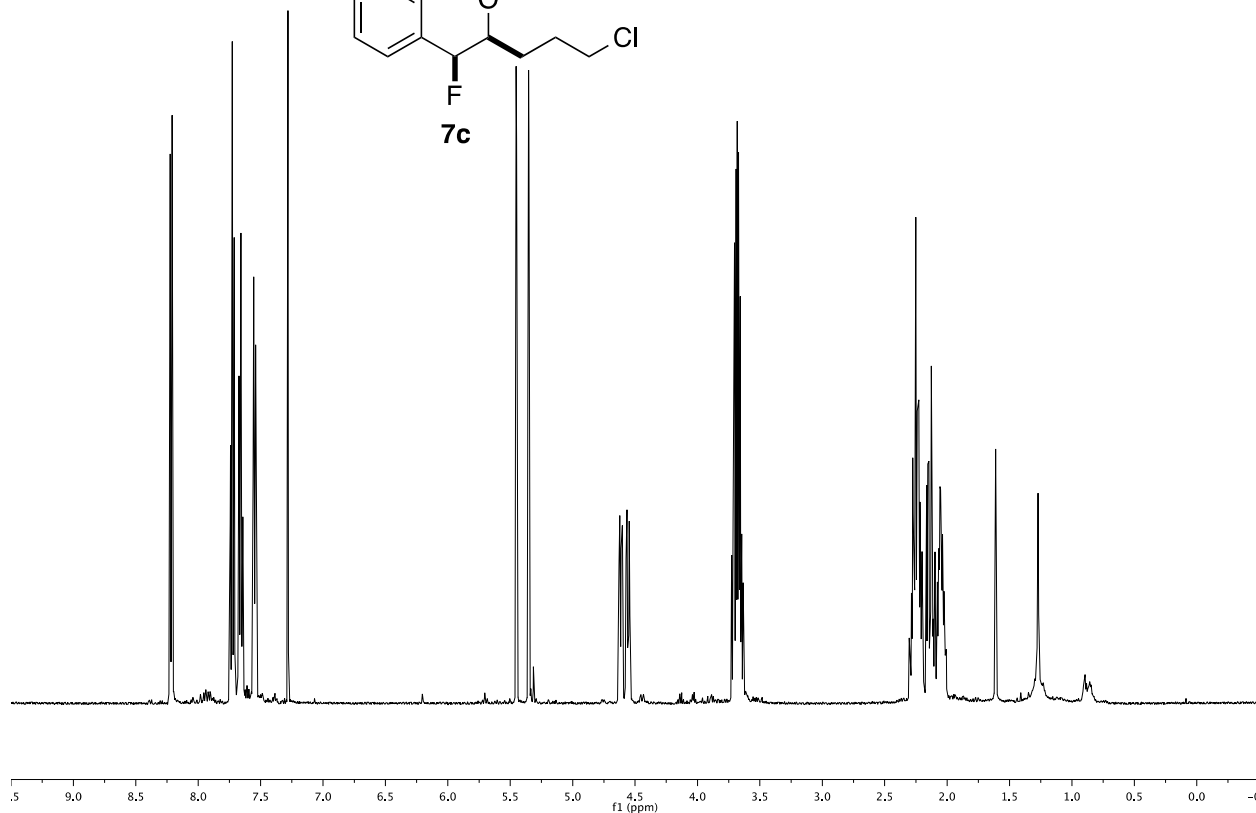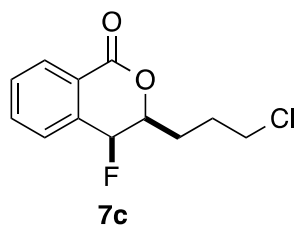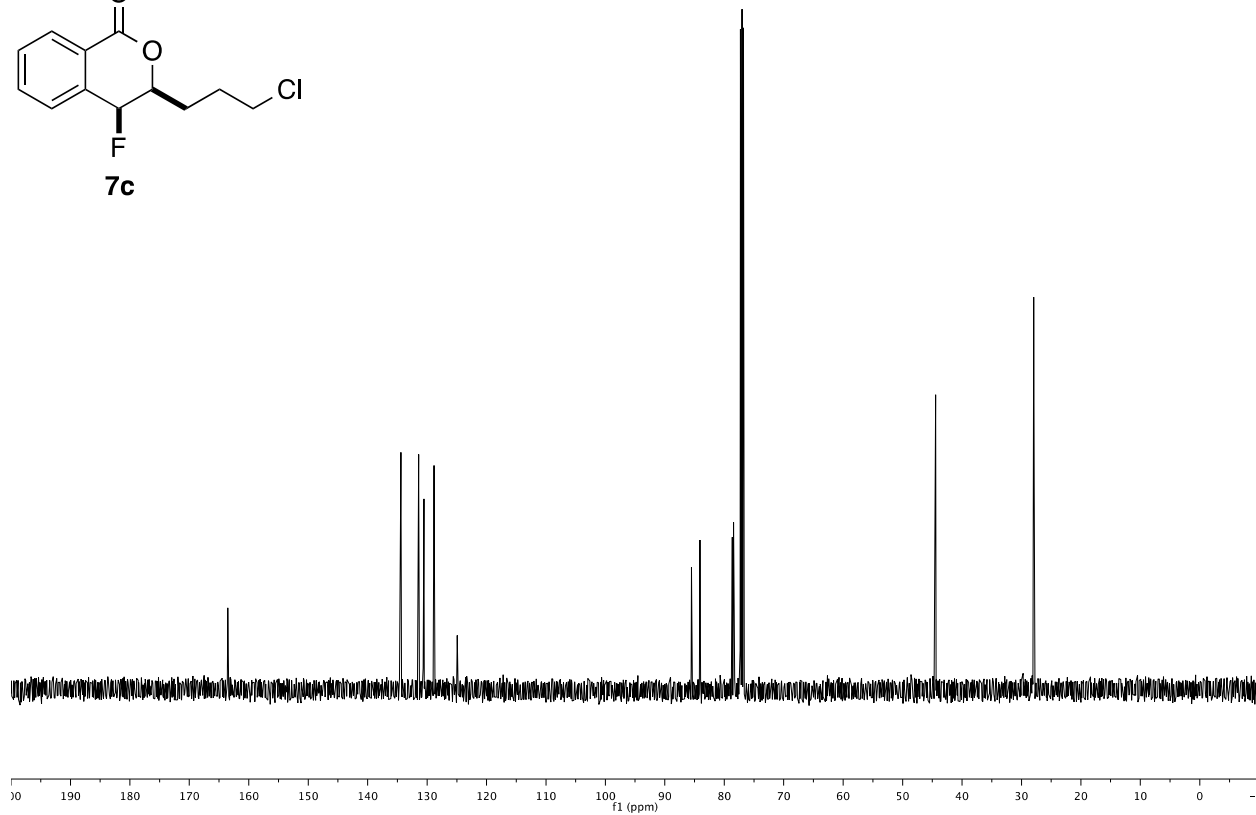

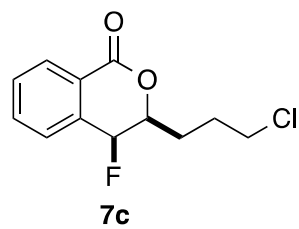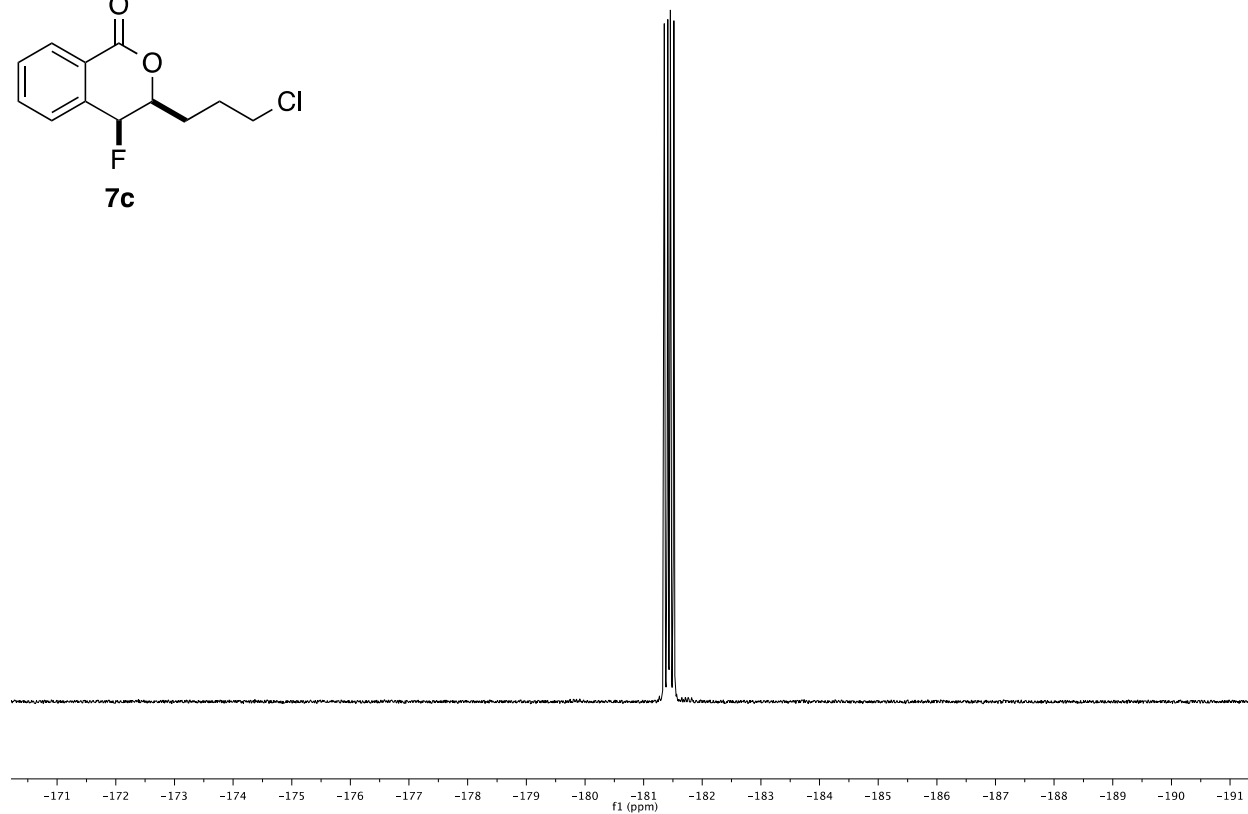



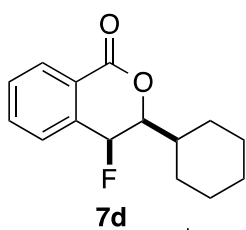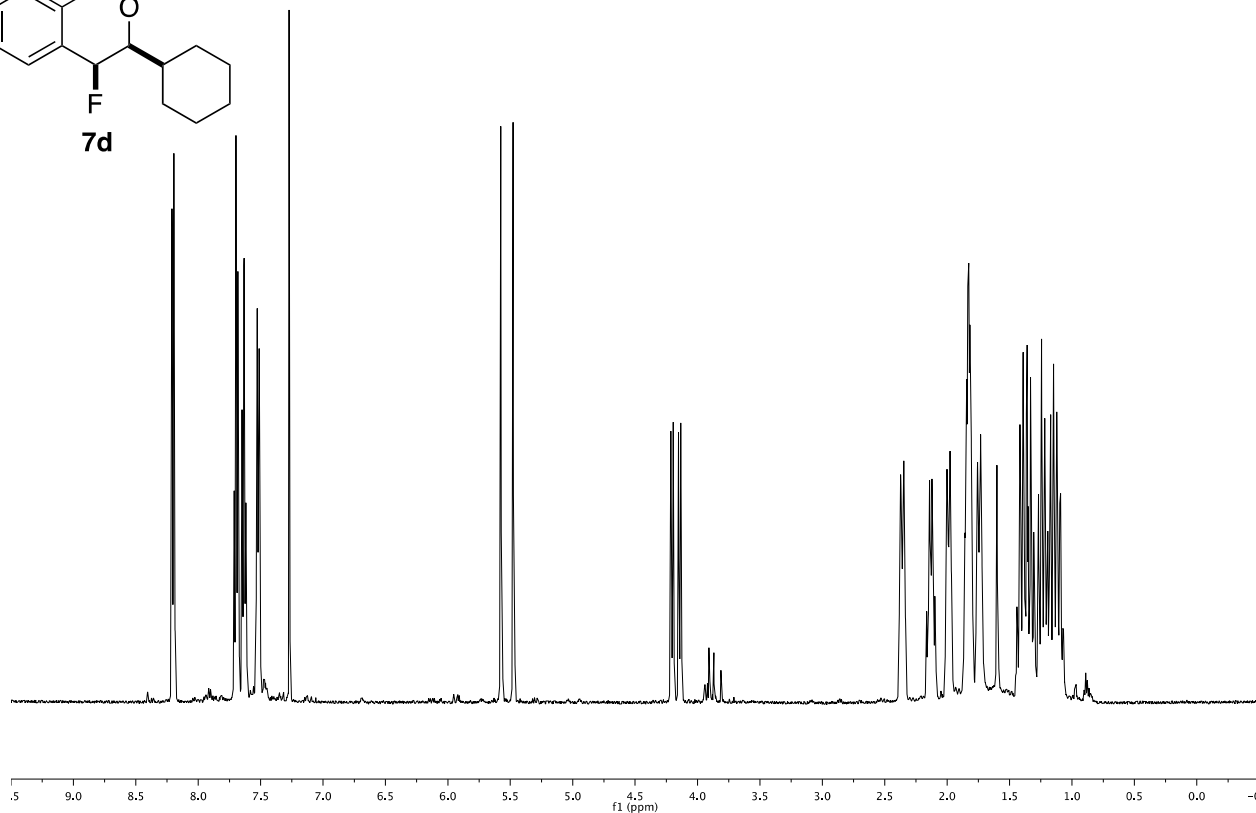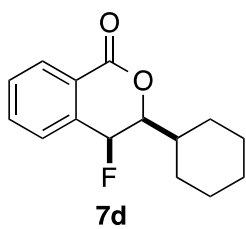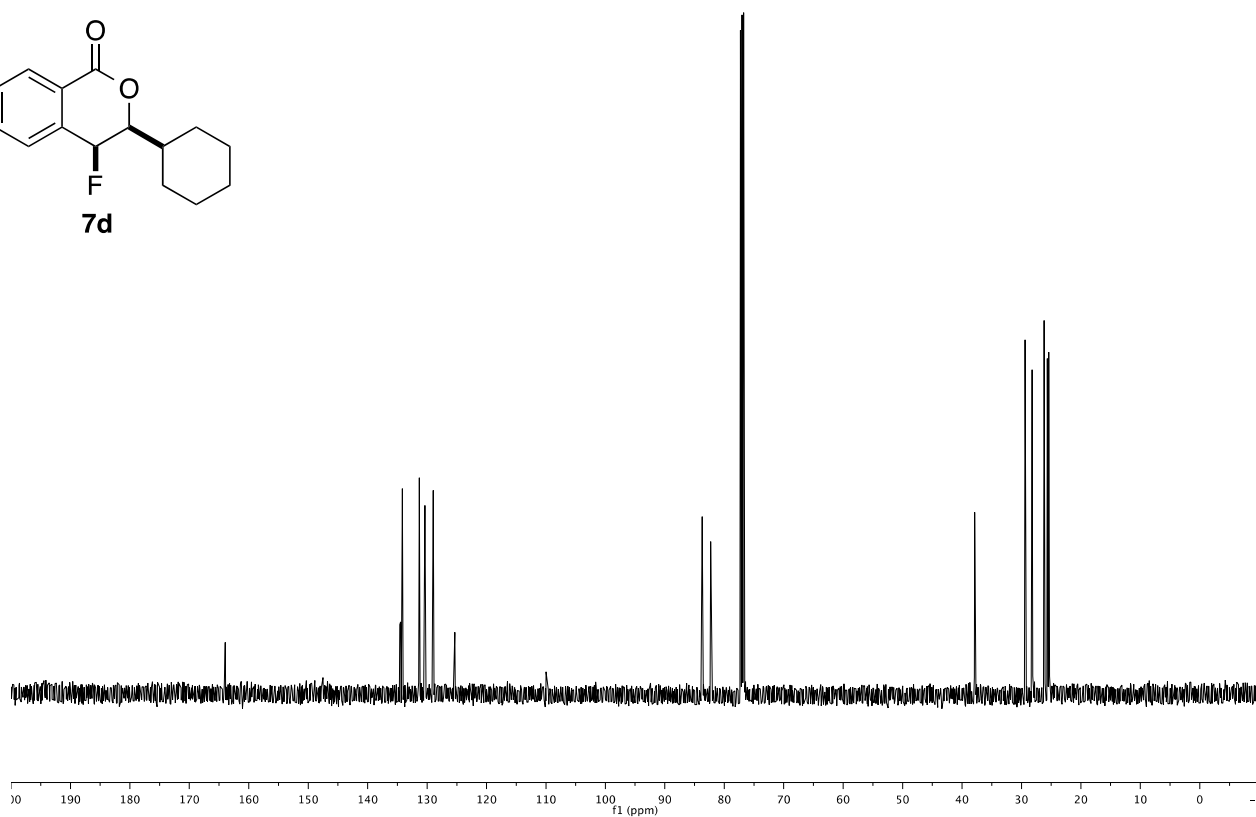

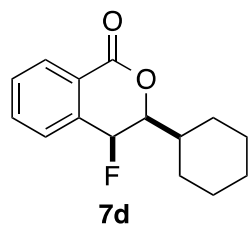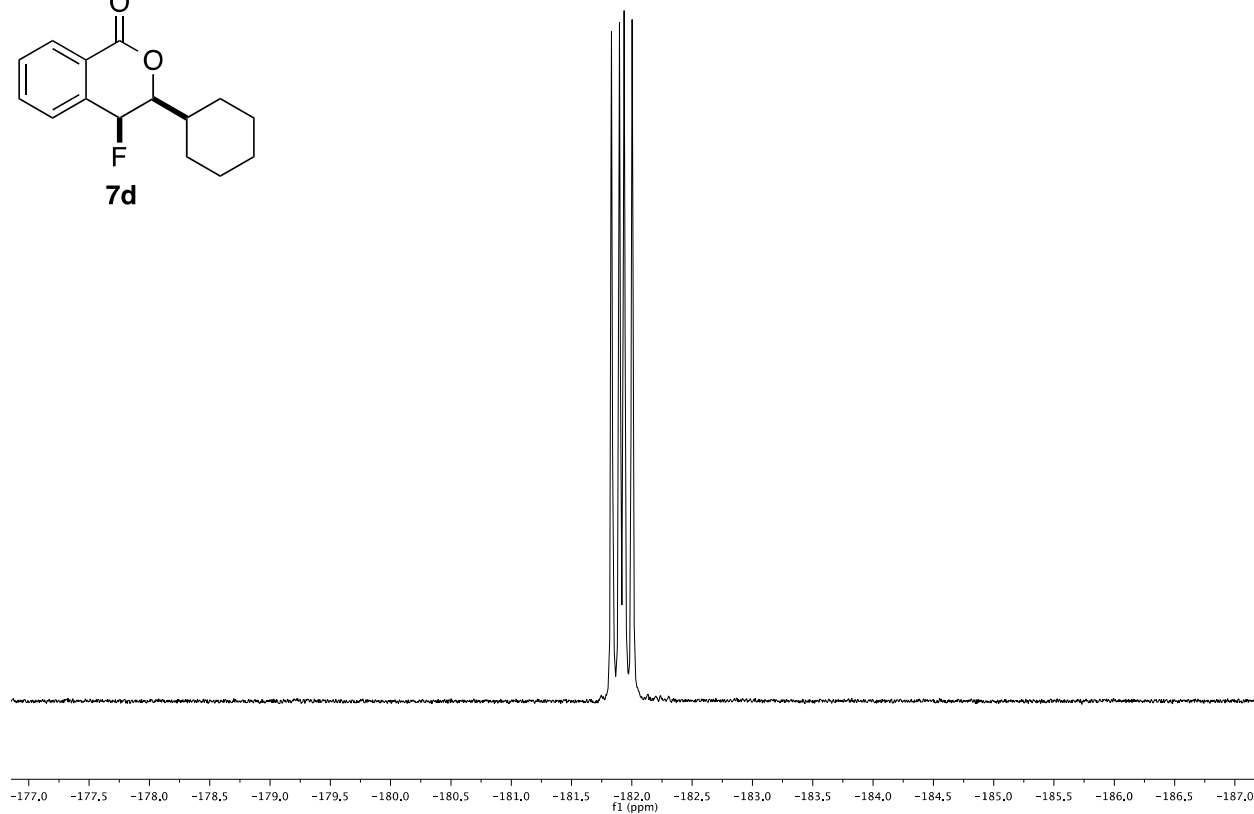

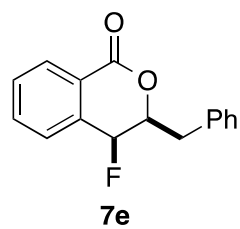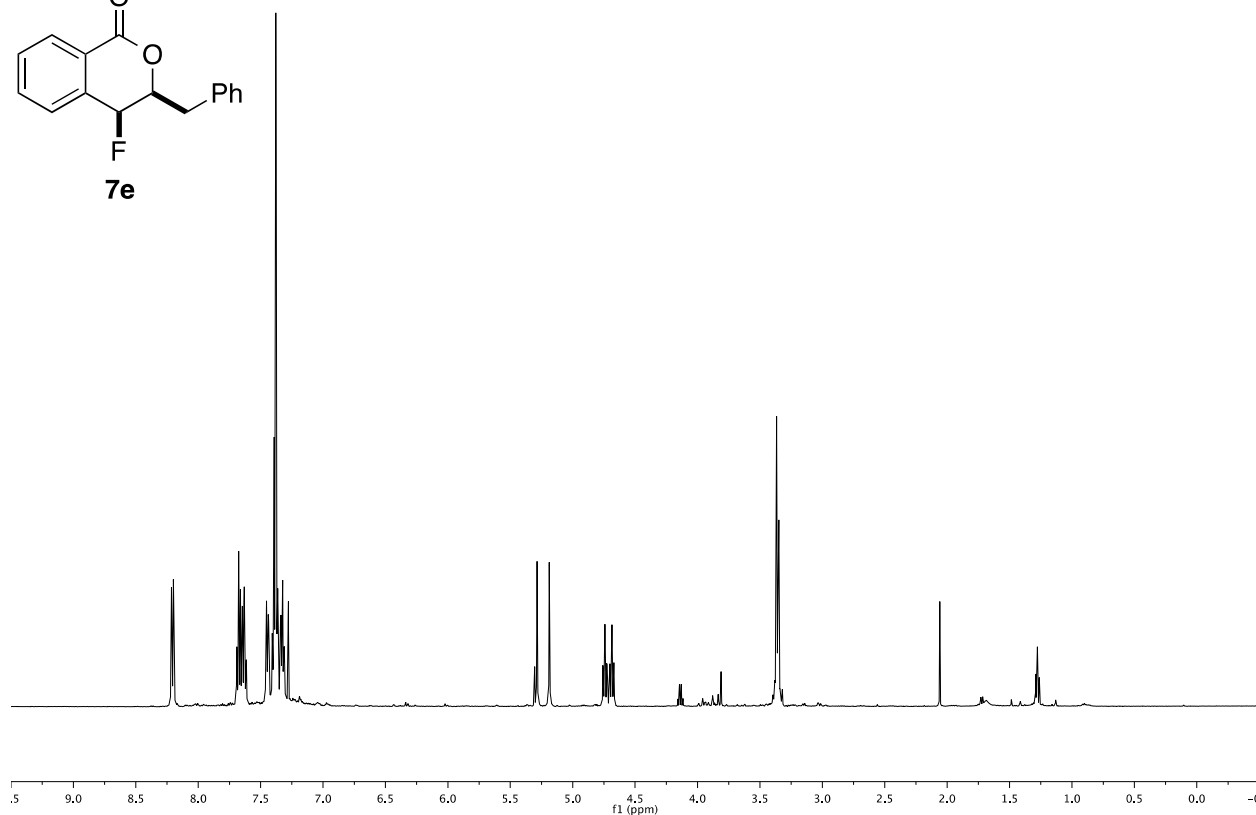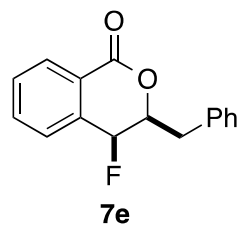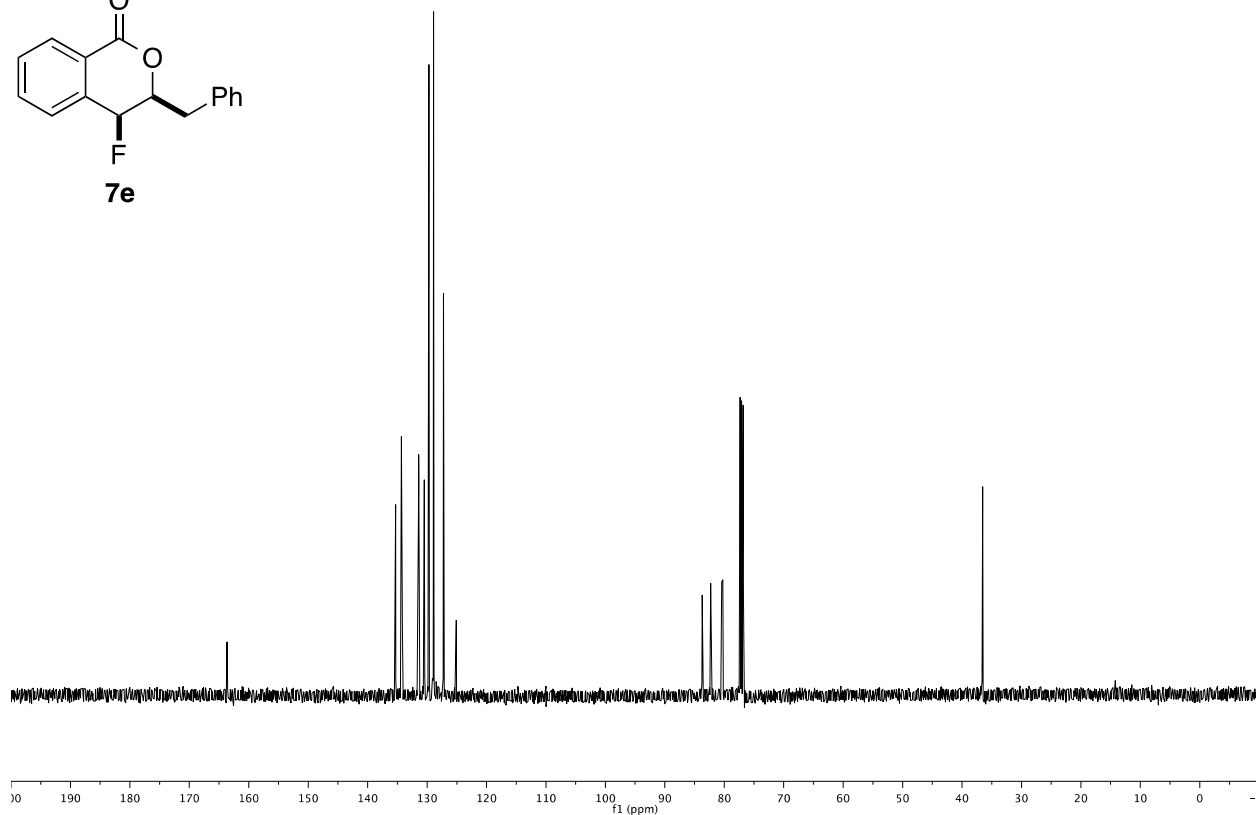

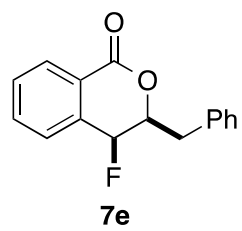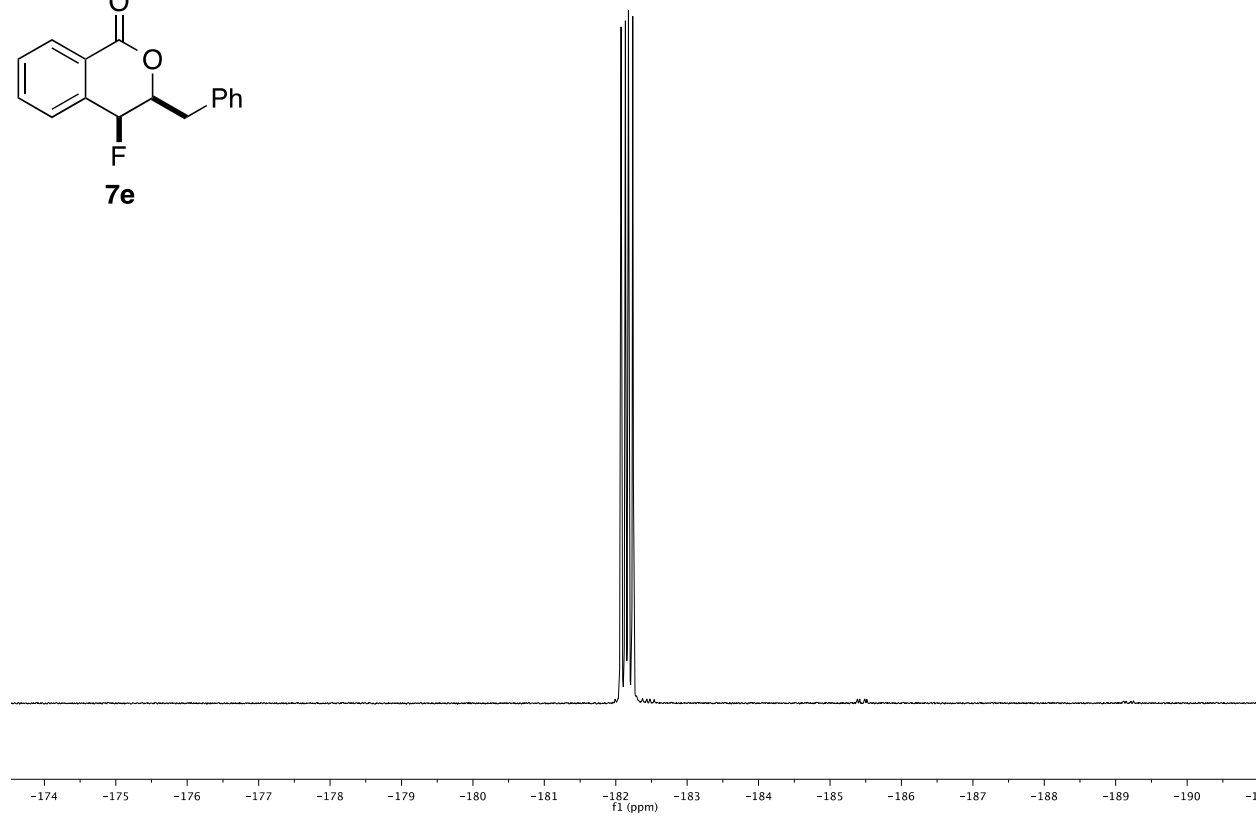

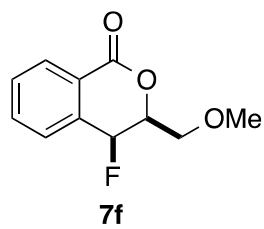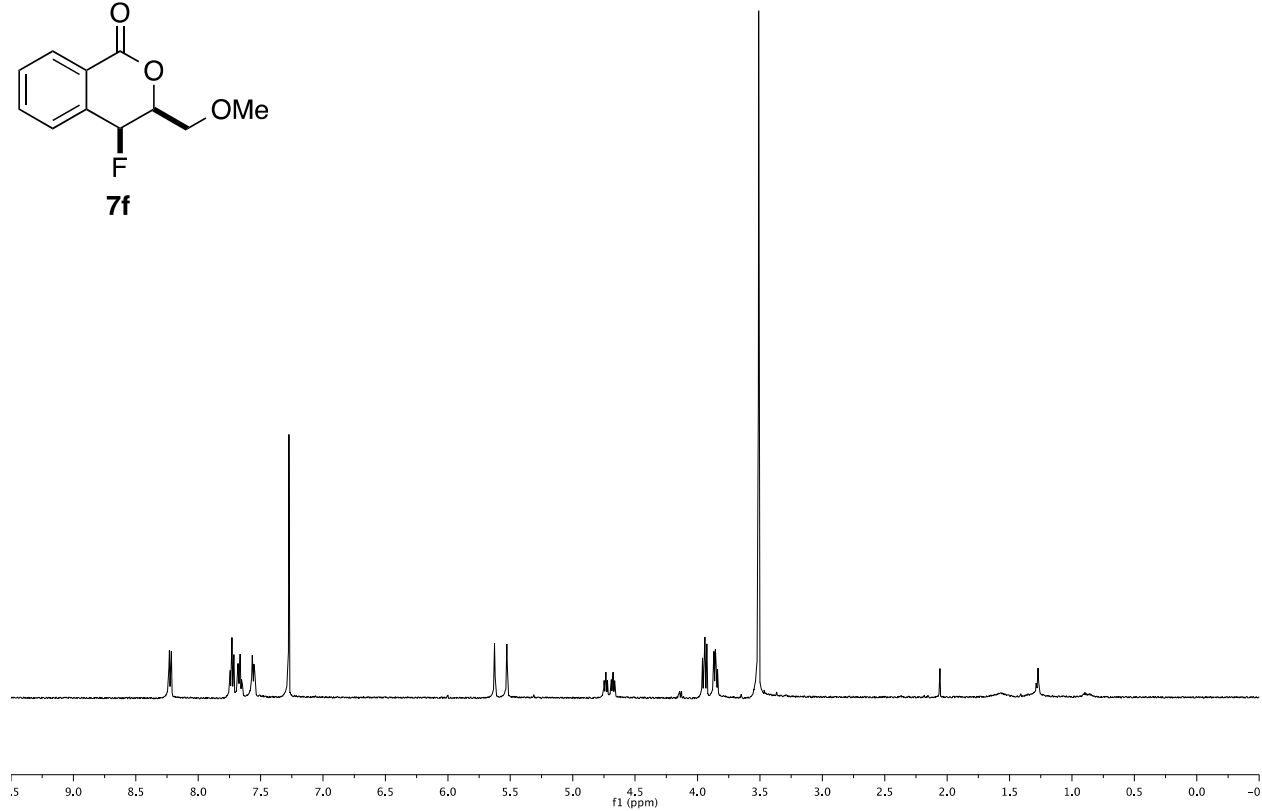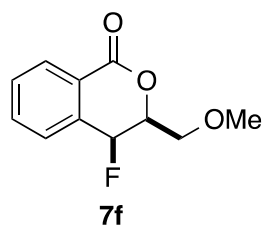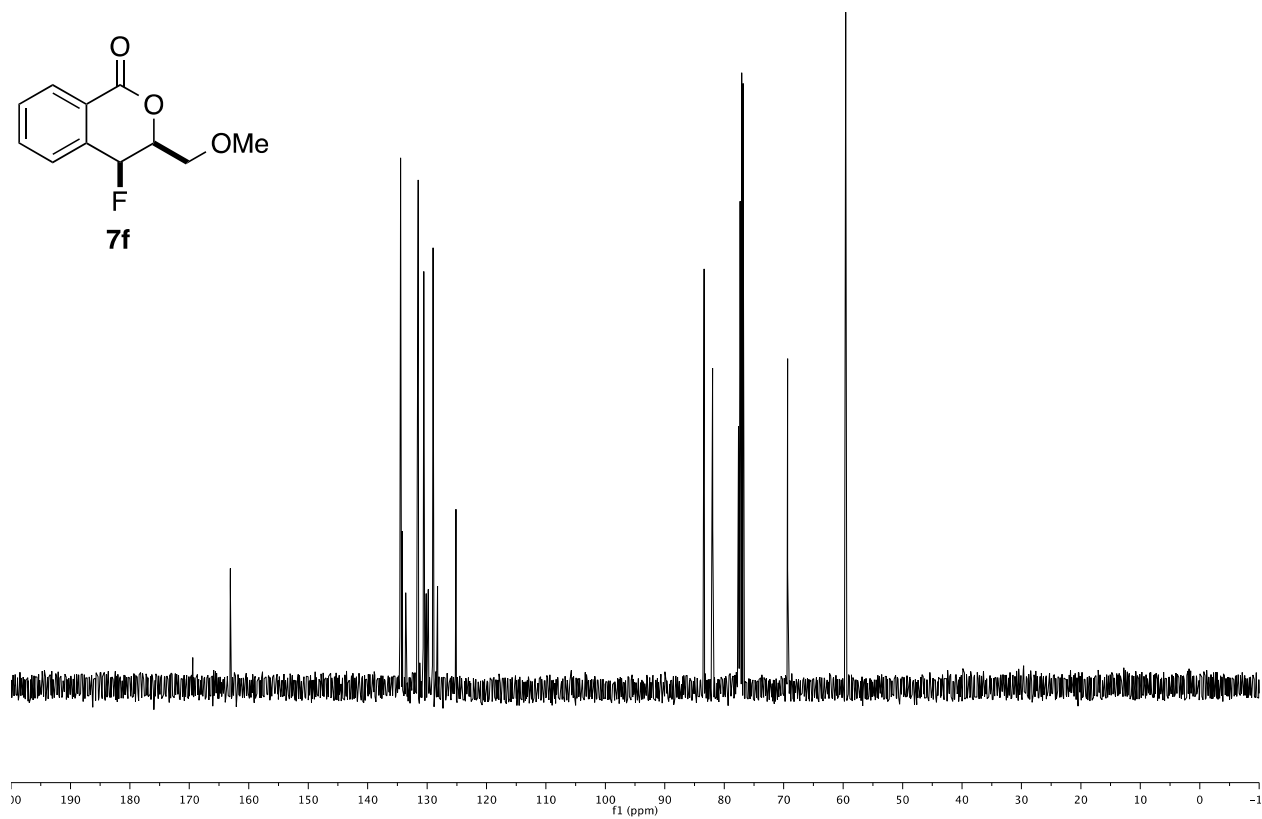

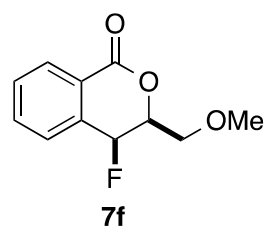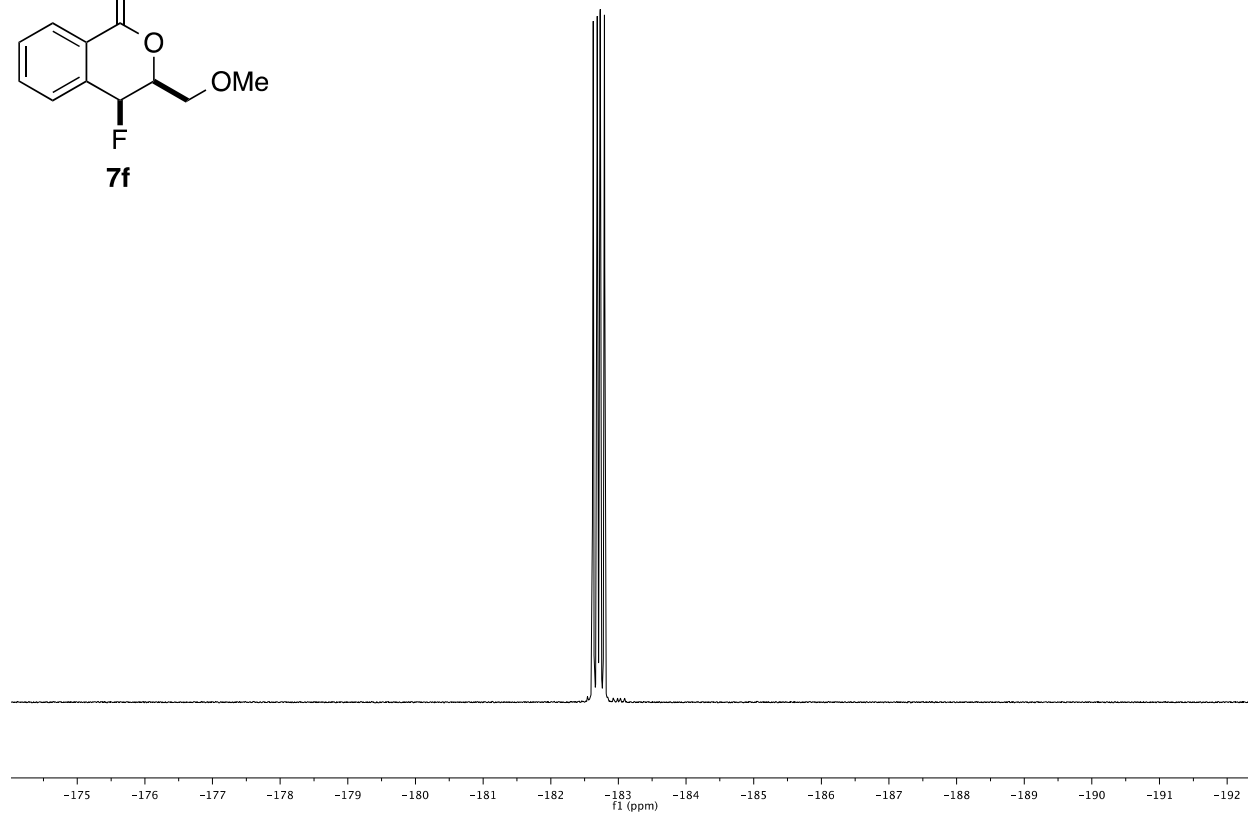

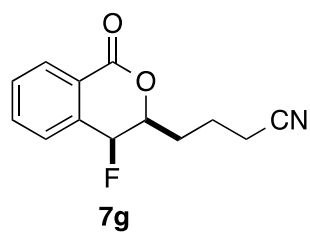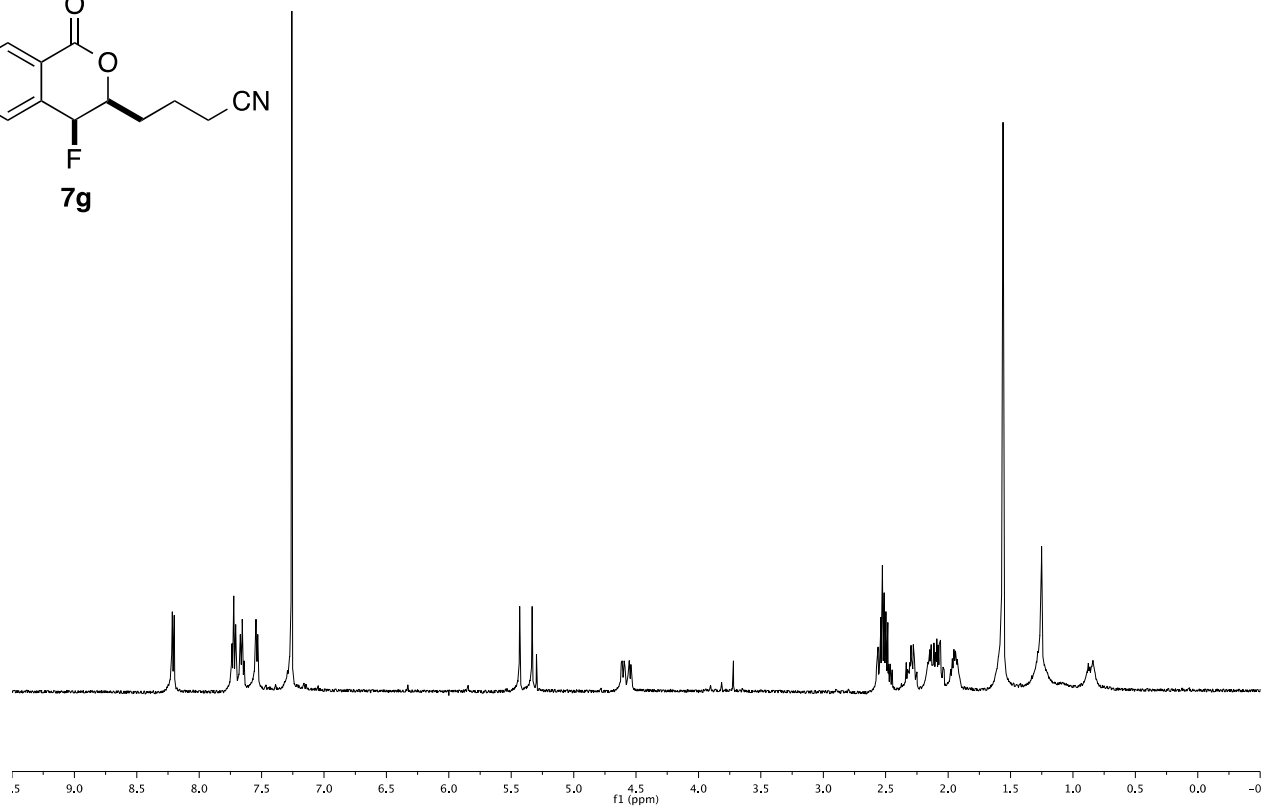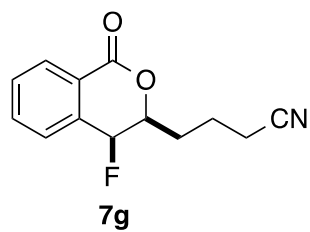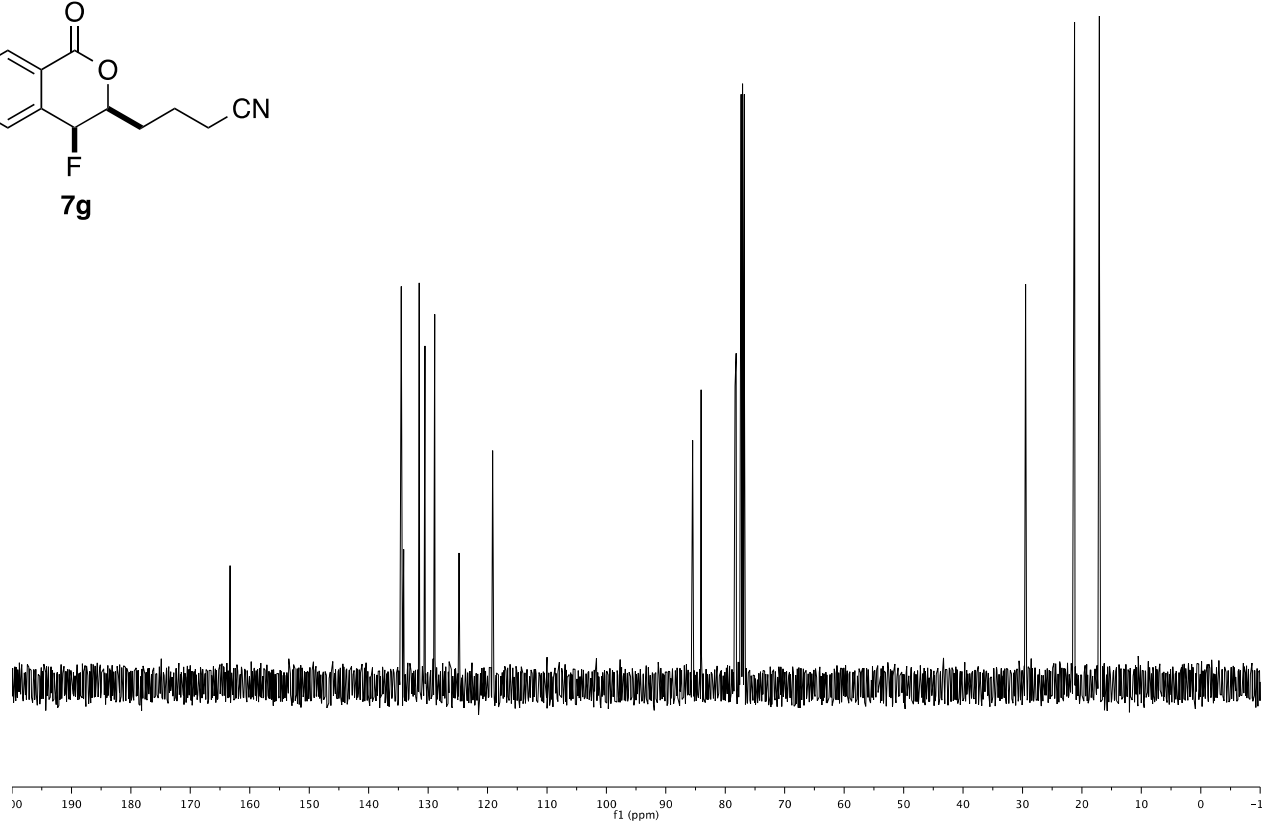

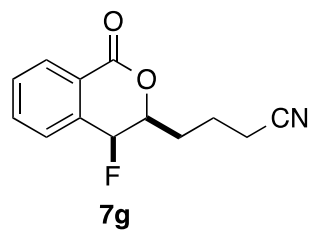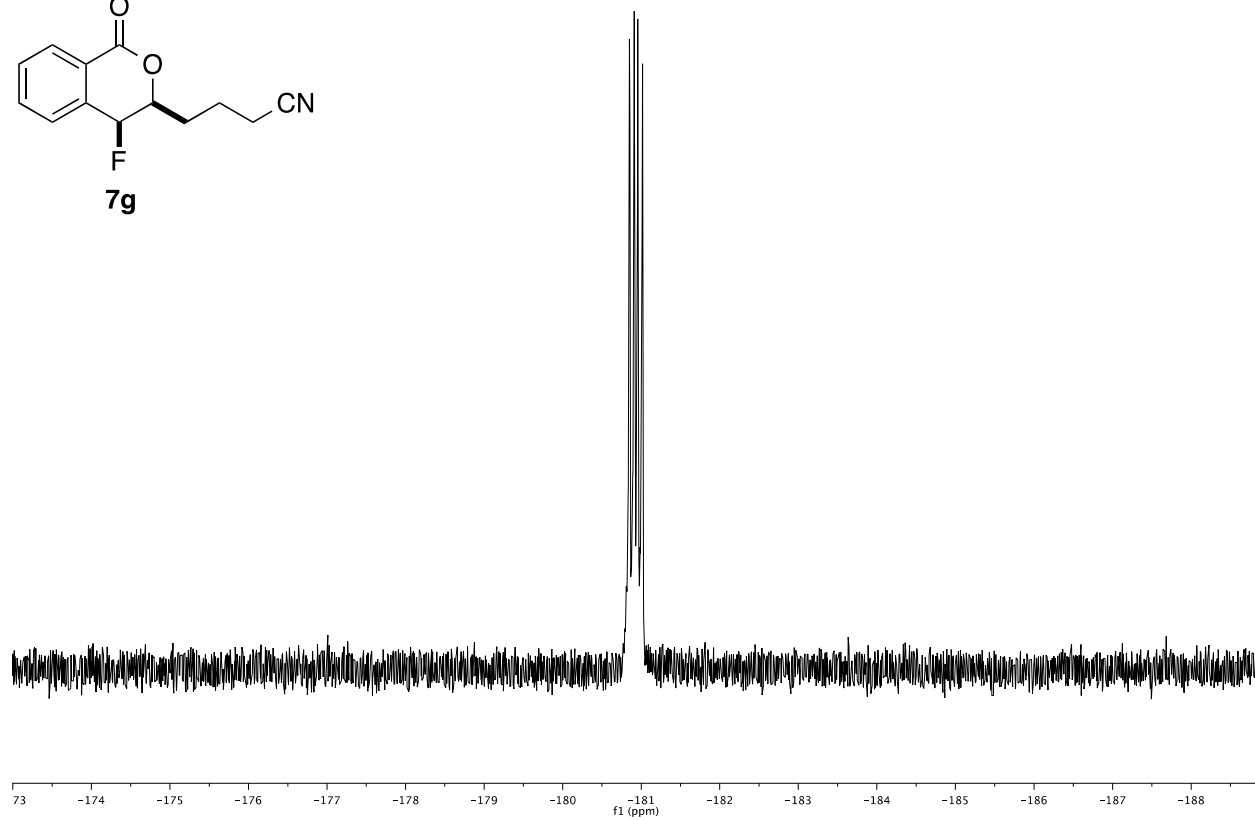



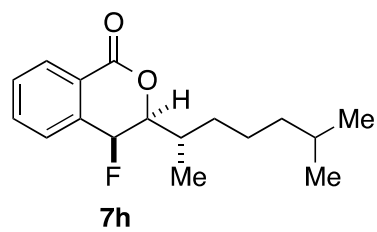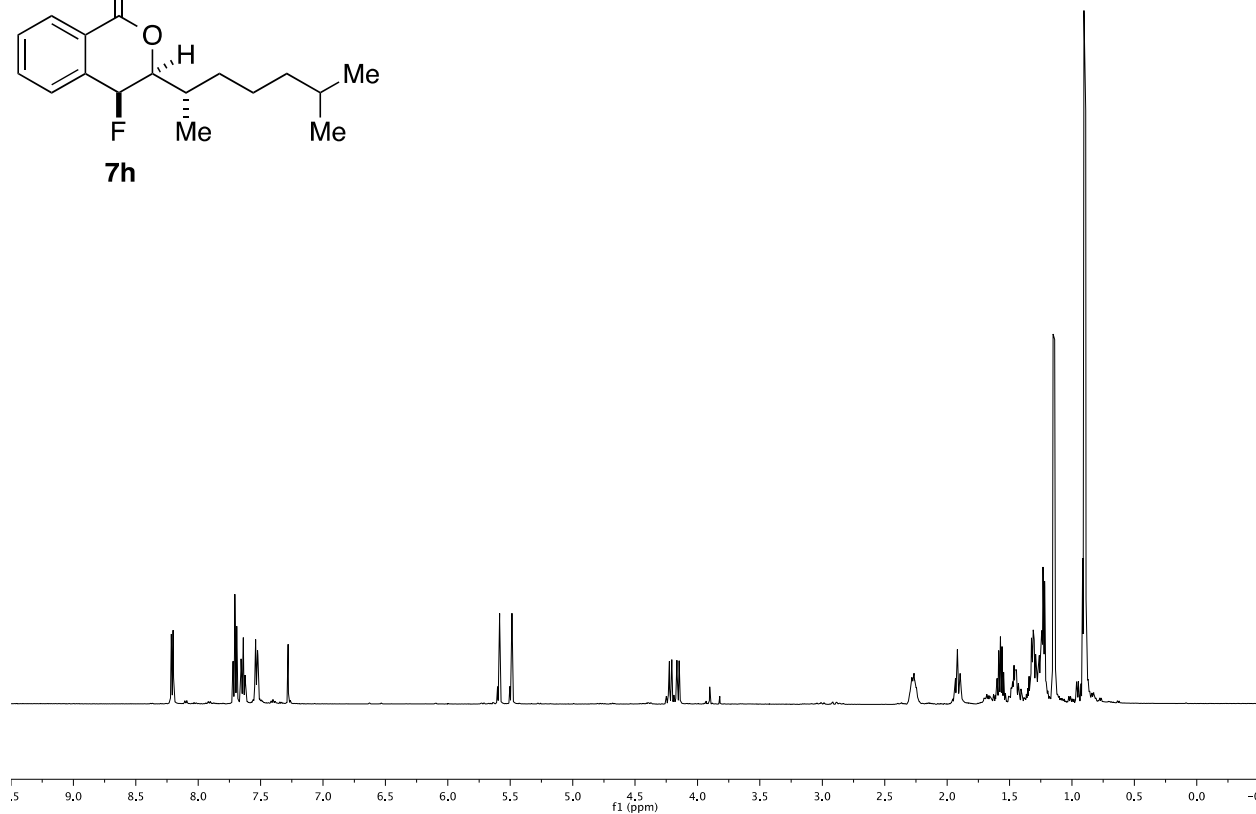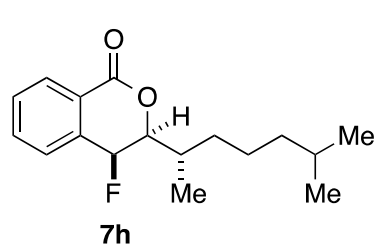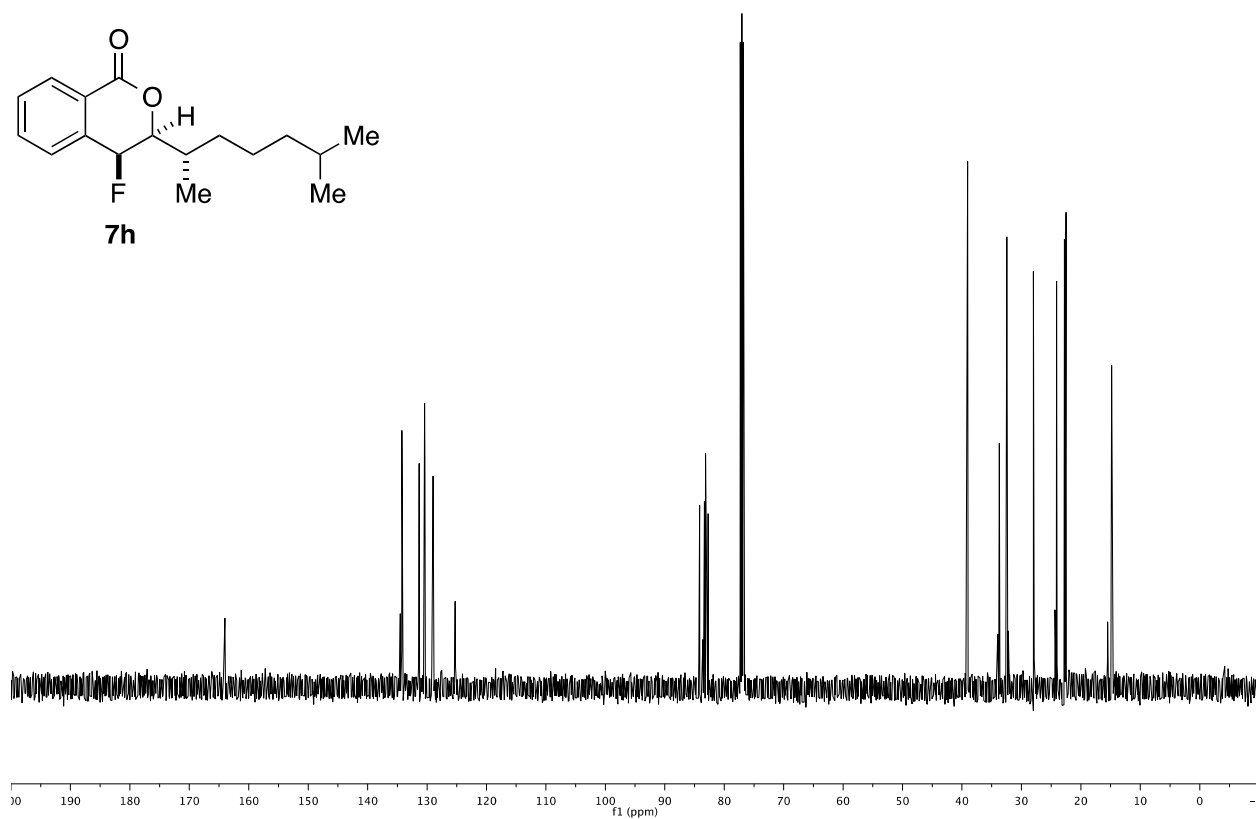

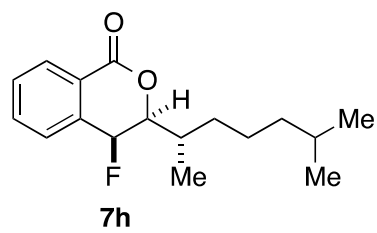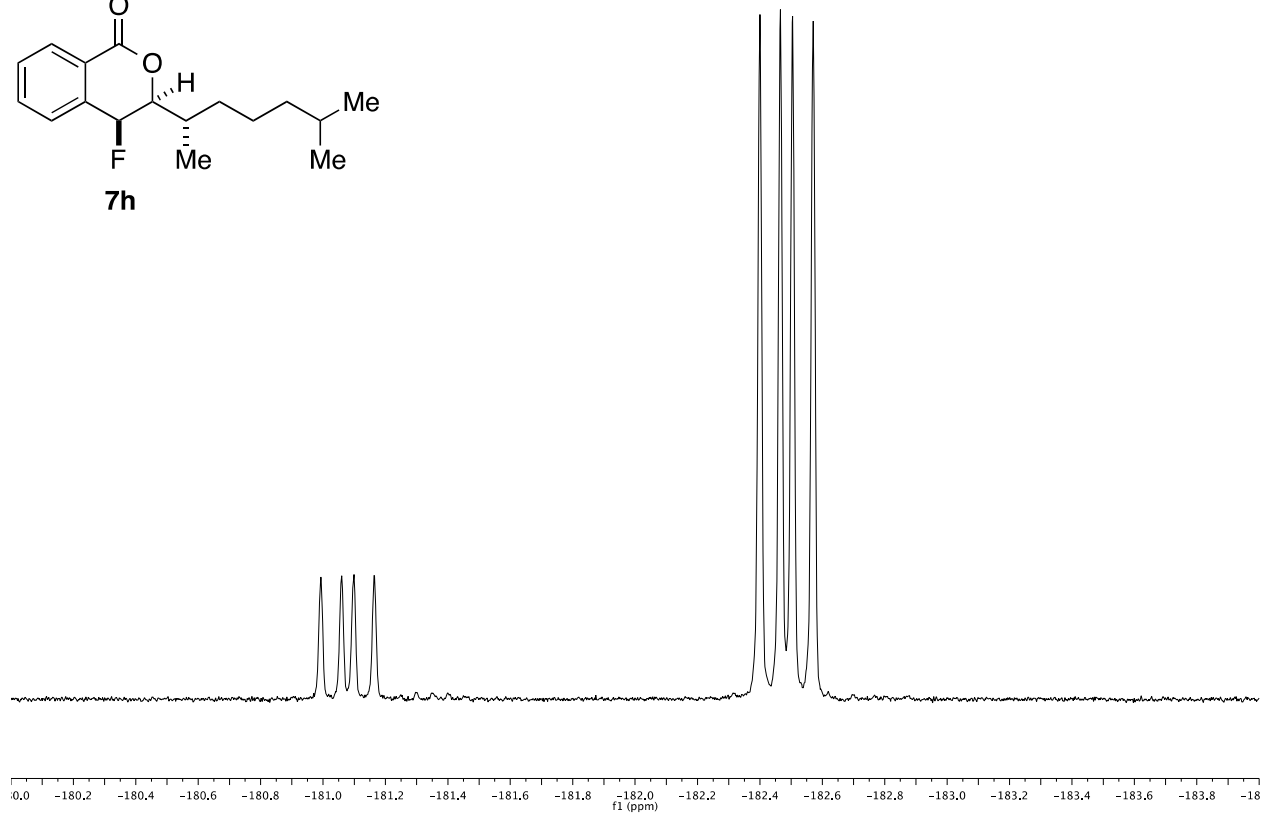

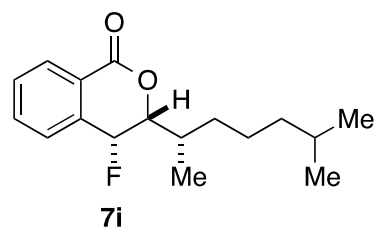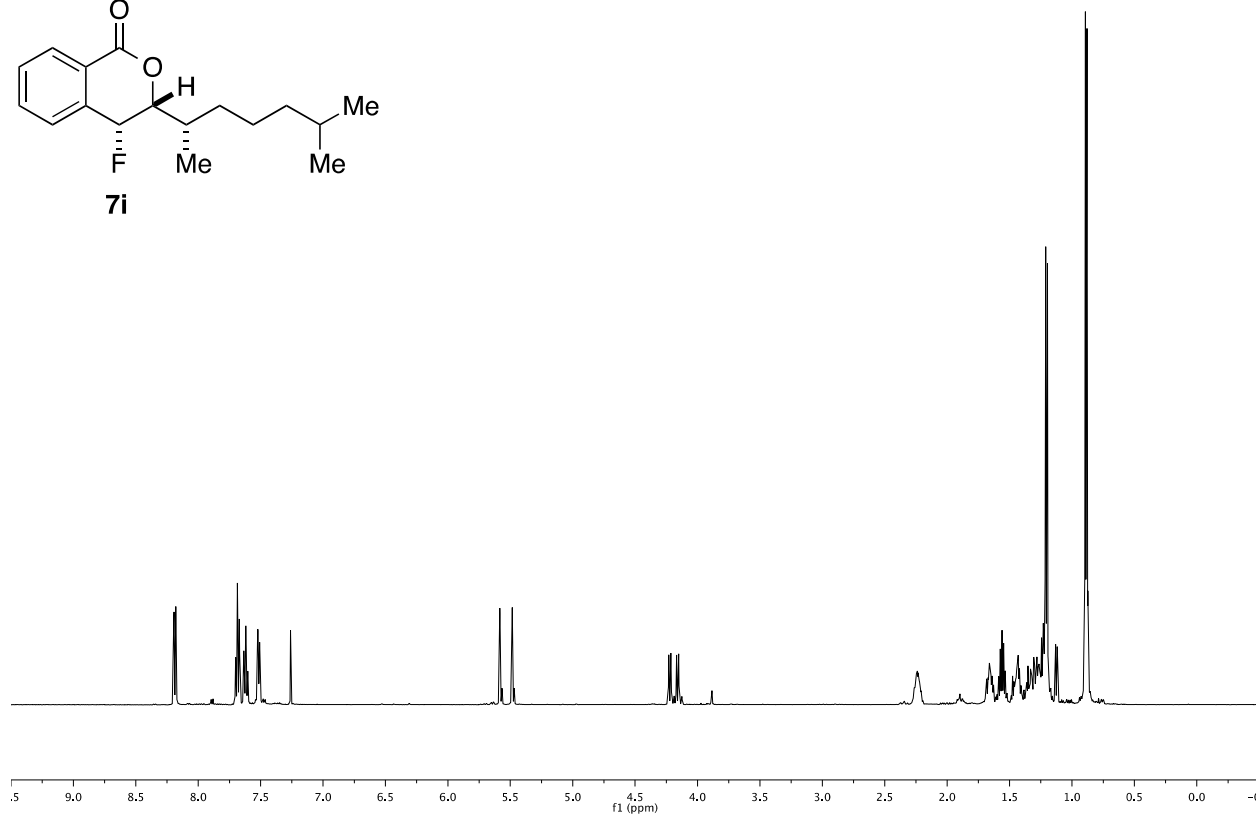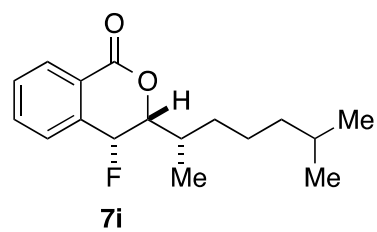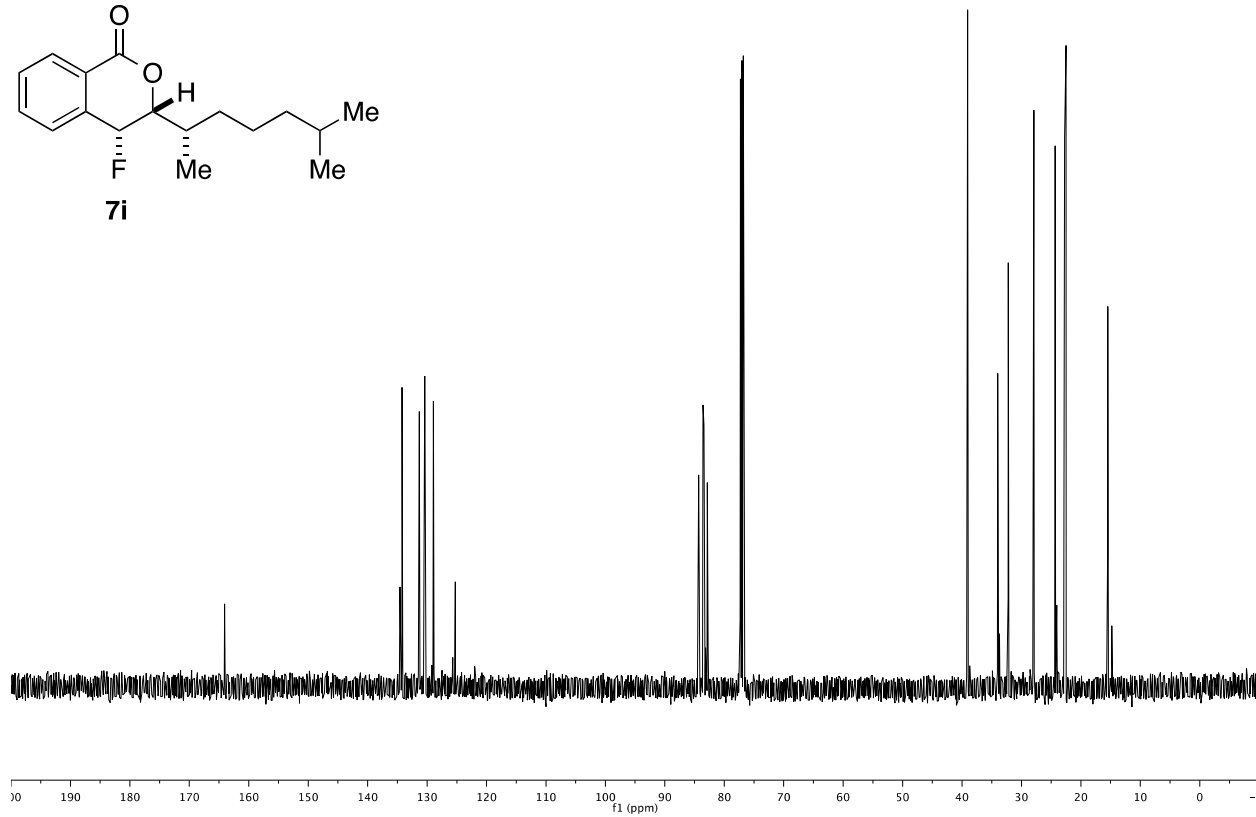

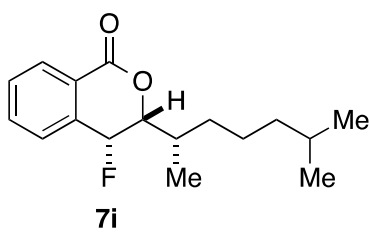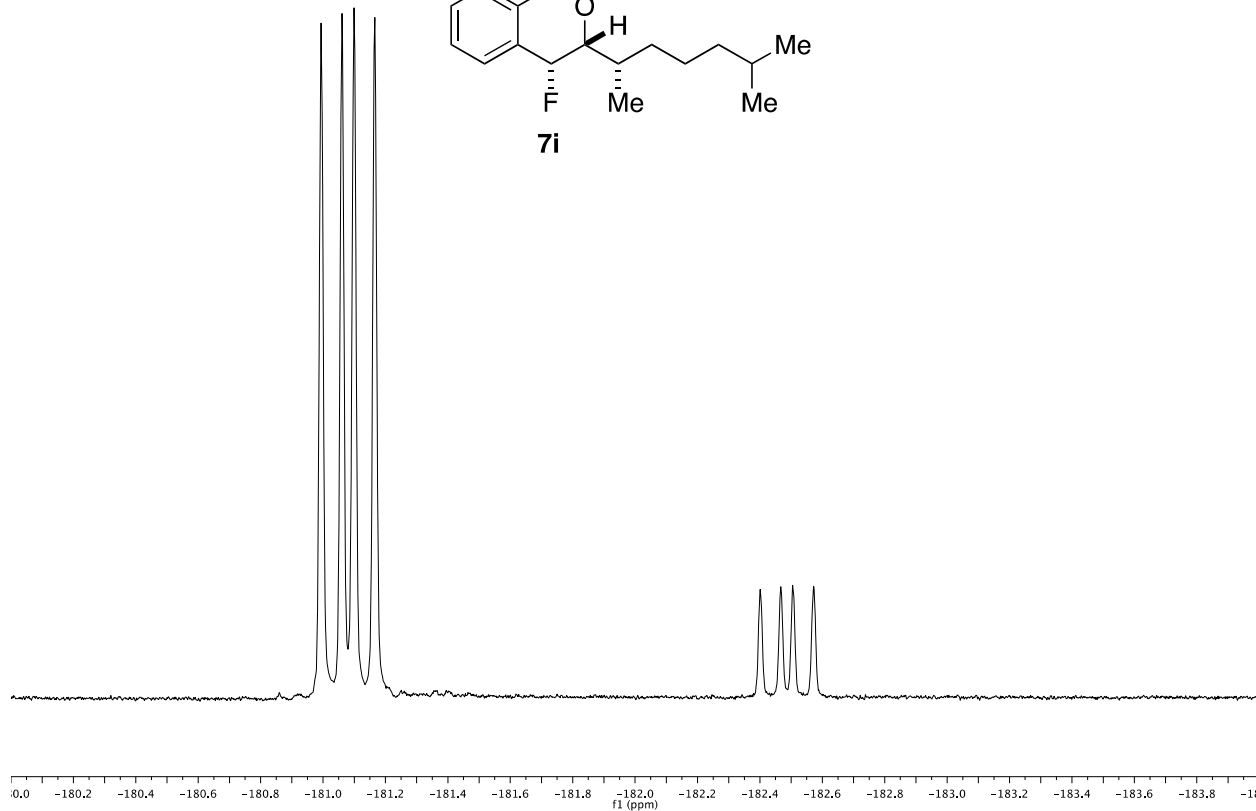

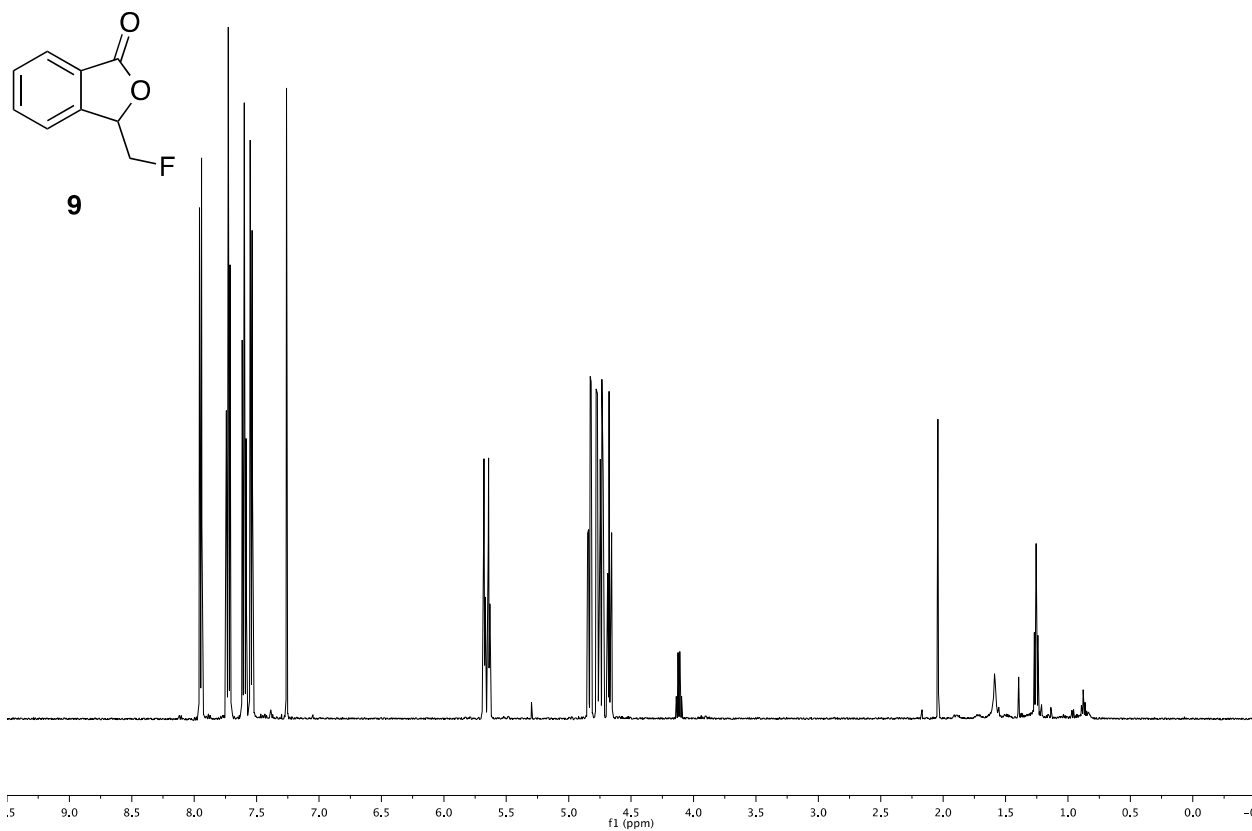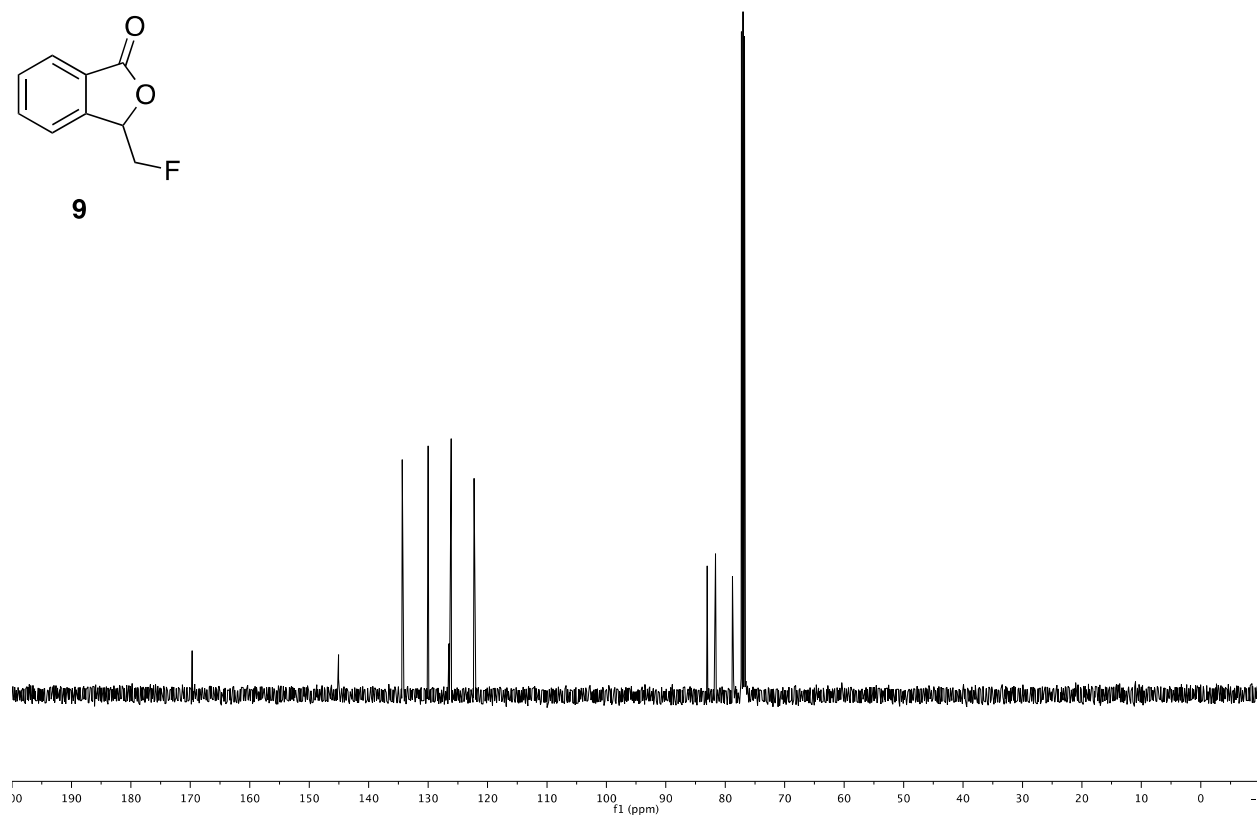

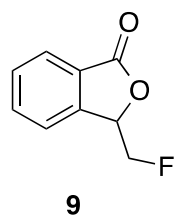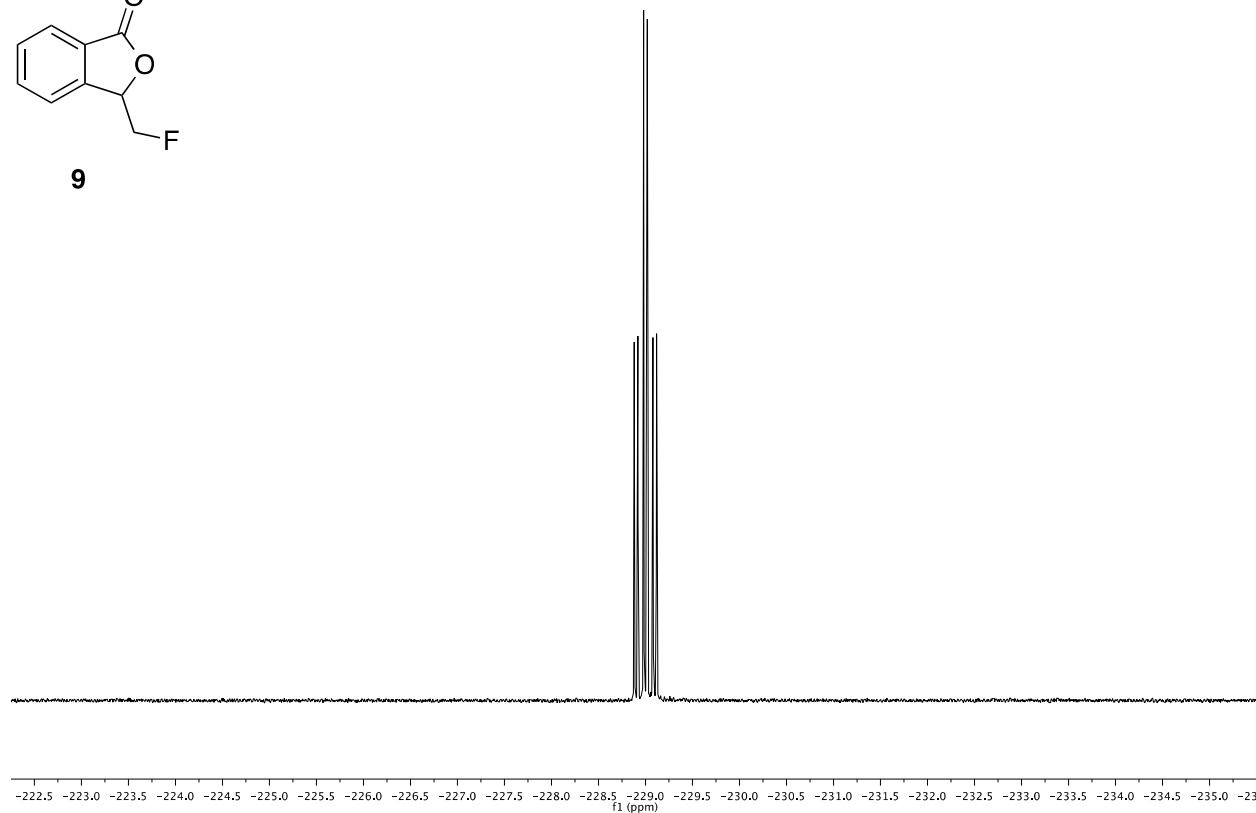

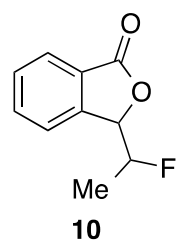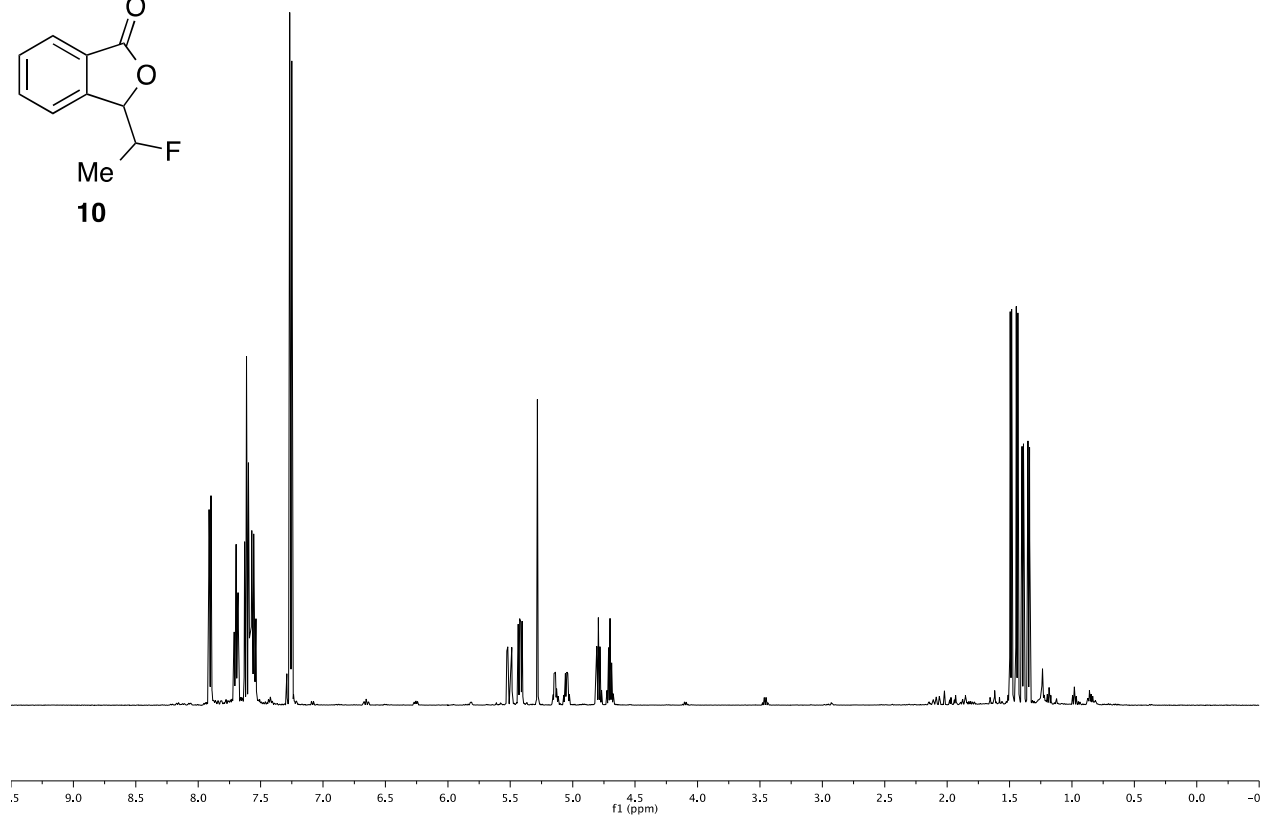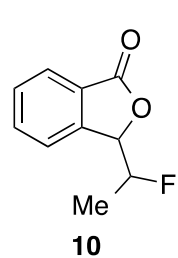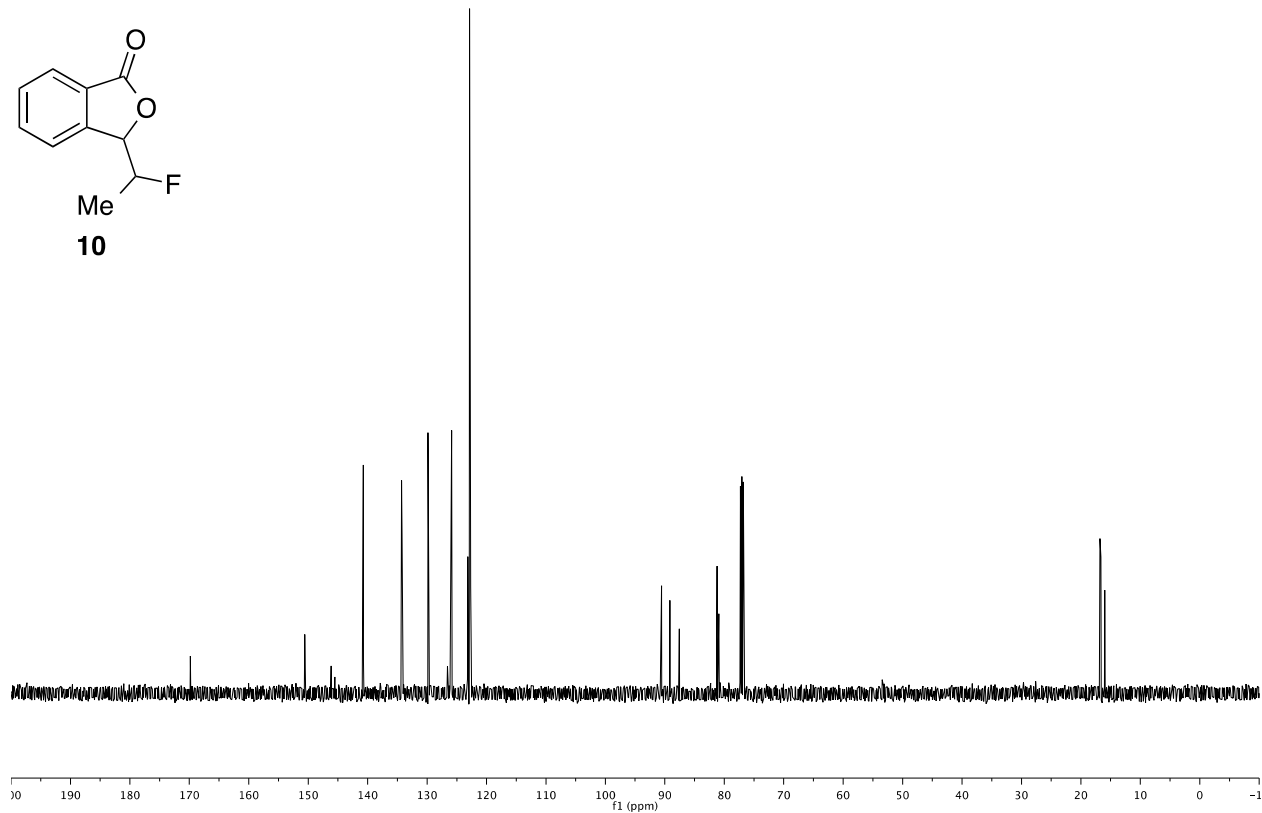

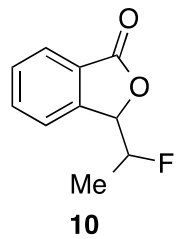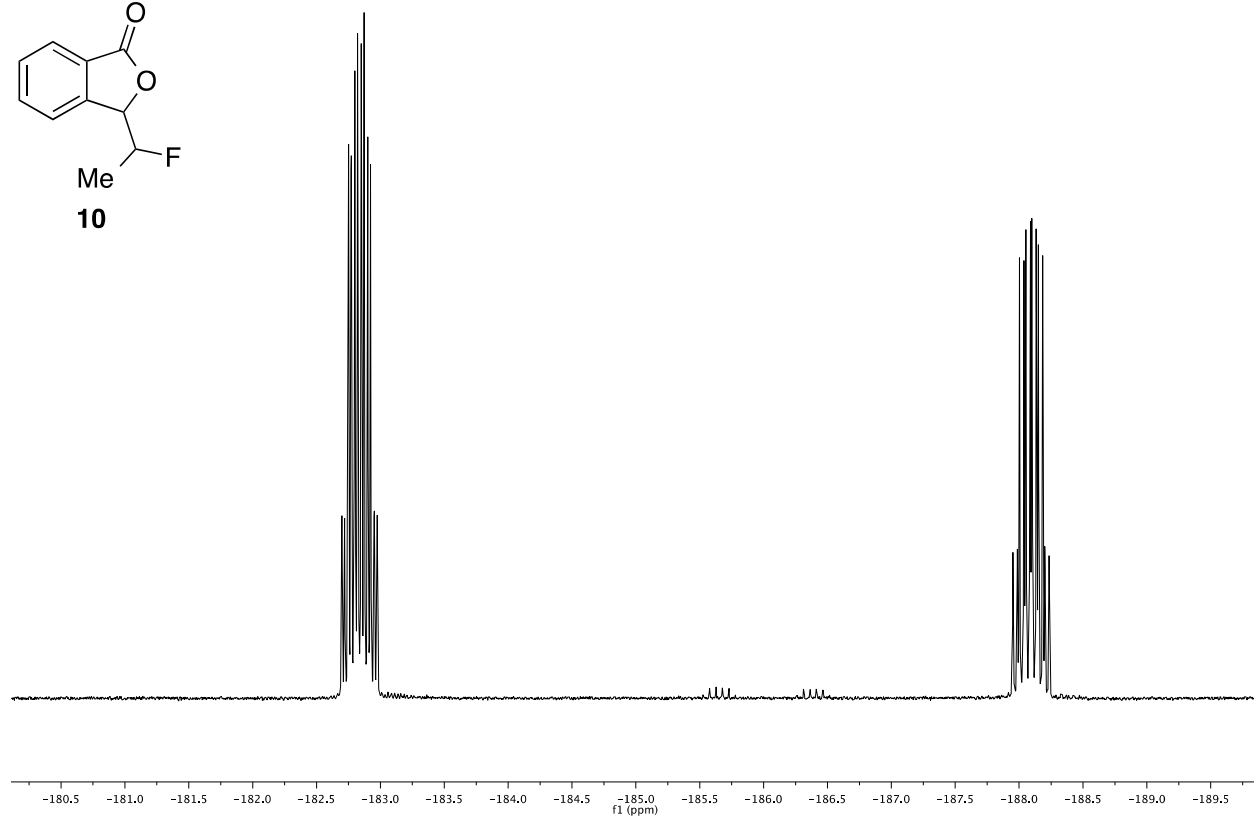



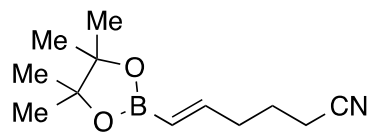

SI-11

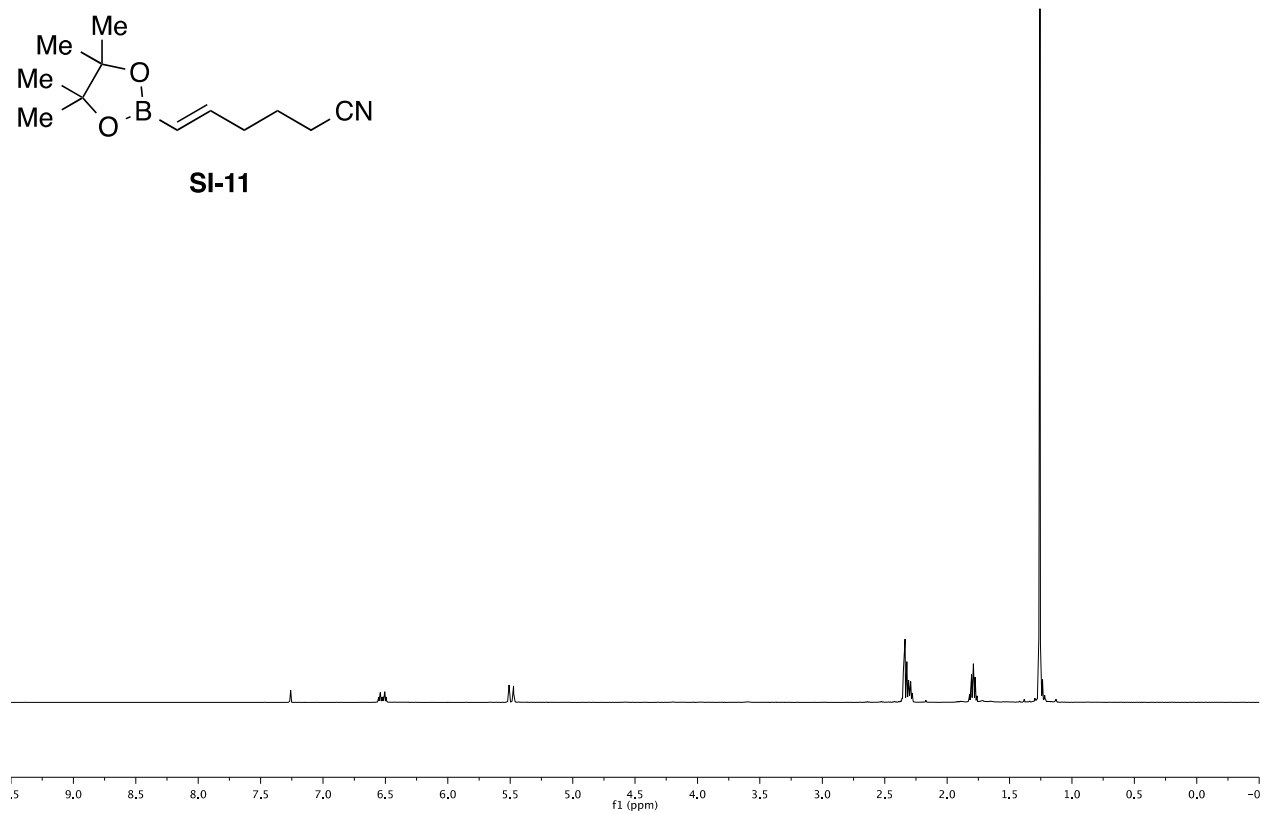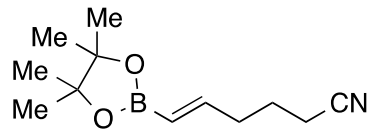

SI-11

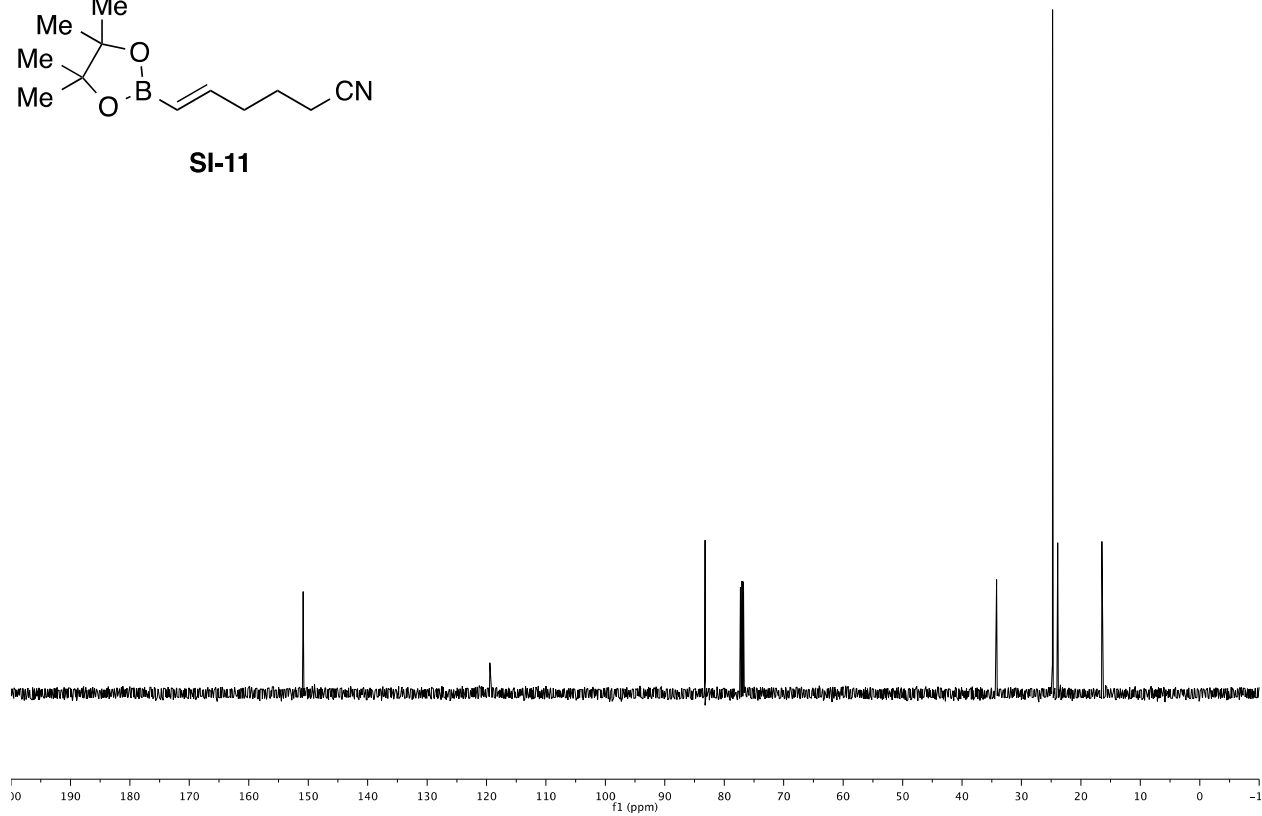

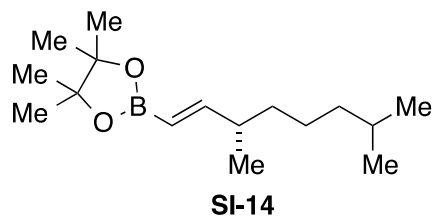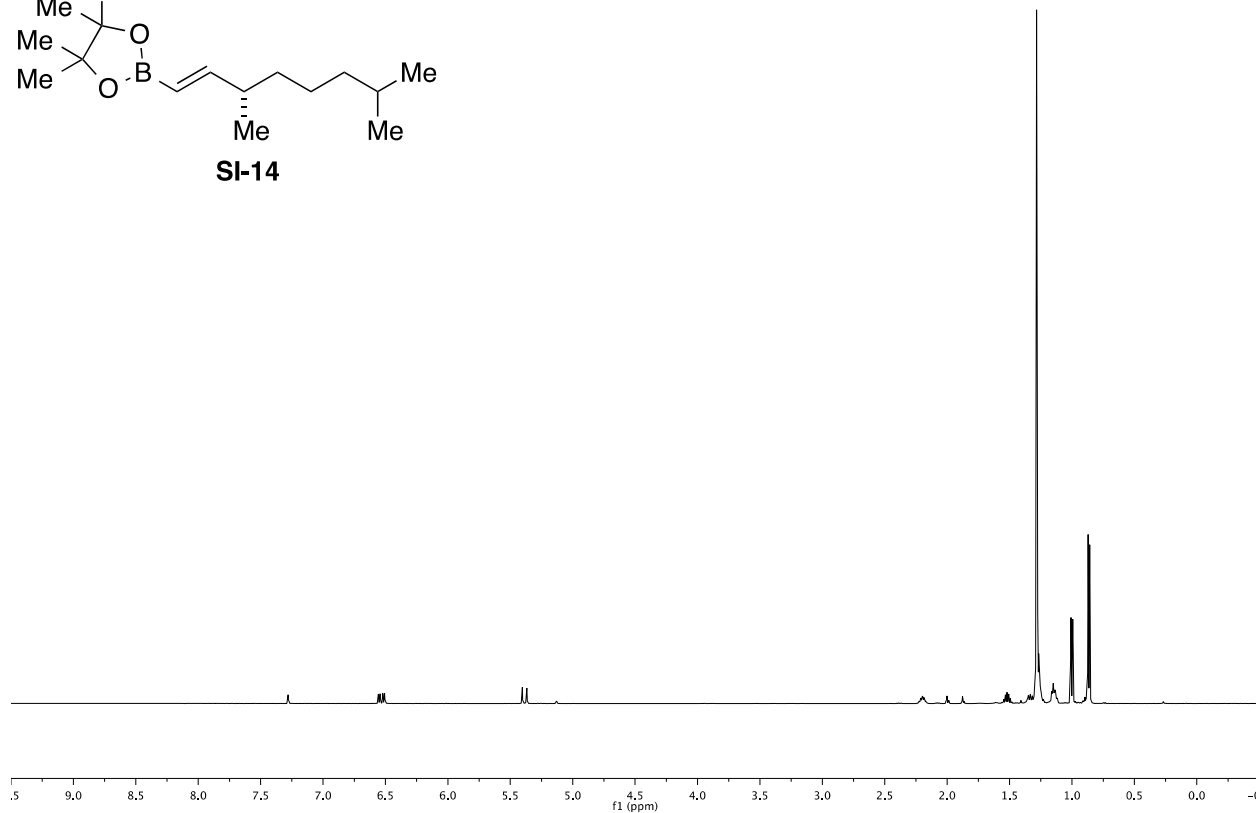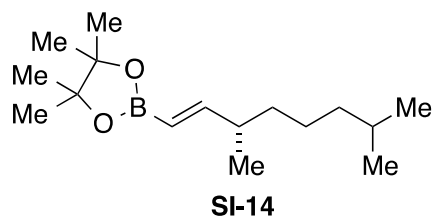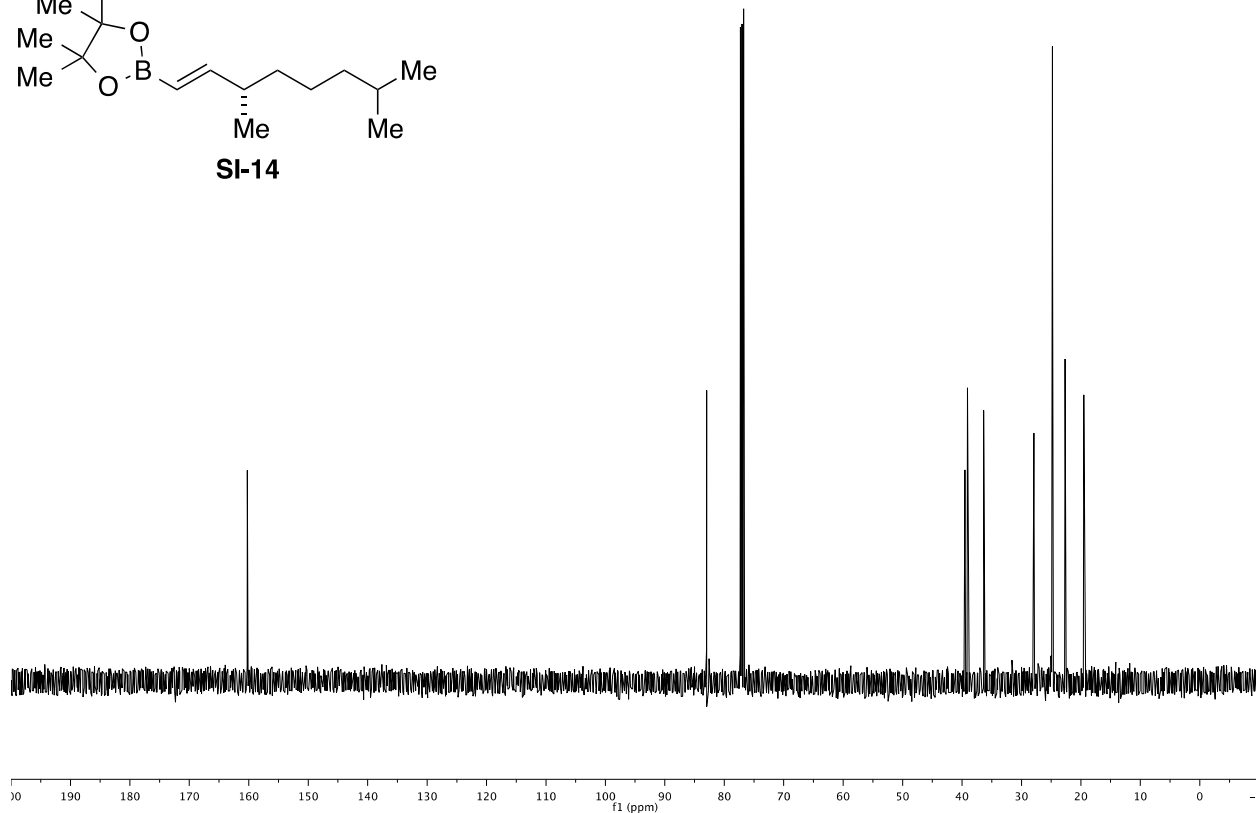

- 
- <sup>1</sup> Pangborn, A.B.; Giardello, M.A; Grubbs, R.H.; Rosen, R.K.; Timmers, F.J. *Organometallics* **1996**, *15*, 1518.
- <sup>2</sup> Still, W.C.; Kahn, M.; Mitra, A.; *J. Org. Chem.* **1978**, *43*, 2923.
- <sup>3</sup> Tsujiyama, S.; Suzuki, K. *Org. Synth.* **2007**, *84*, 272-284.
- <sup>4</sup> Fujita, M.; Mori, K.; Shimogaki, M.; Sugimura, T. *Org. Lett.* **2012**, *14*, 1294-1297.
- <sup>5</sup> Emer, E.; Pfeifer, L.; Brown, J. M.; Gouverneur, V. *Angew. Chem. Int. Ed.* **2014**, *53*, 4181-4185.
- <sup>6</sup> Mitra, P.; Shome, B.; De, S. R.; Sarkar, A.; Mal, D. *Org. Biomol. Chem.* **2012**, *10*, 2742-2752.
- <sup>7</sup> Fujita, M.; Yoshida, Y.; Miyata, K.; Wakisaka, A.; Sugimura, T. *Angew. Chem. Int. Ed.* **2010**, *49*, 7068-7071.
